# Supplementary material for: Site-Specific O-Glycosylation Analysis of SARS-CoV-2 Spike Protein Produced in Insect and Human Cells
Source: MDPI journal article supplement (doi:10.3390/v13040551), 2021-03-25

**Figure S3. Examples of ETD MS2 spectra representing the different O-glycosites identified using the Orbitrap Fusion Lumos mass spectrometer.** c and z product fragment ions are annotated in the peptide sequence. The source raw file is indicated in the top left corner (i1 – monomeric RBD expressed in insect cells, i3 – ectodomain expressed in insect cells, h3m – ectodomain expressed in HEK 293F cells).

**T63**

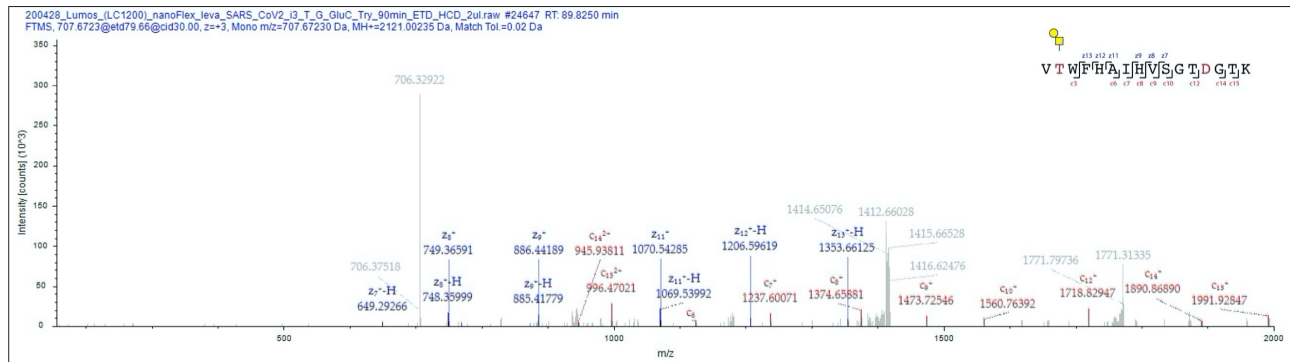

**S71, T73**

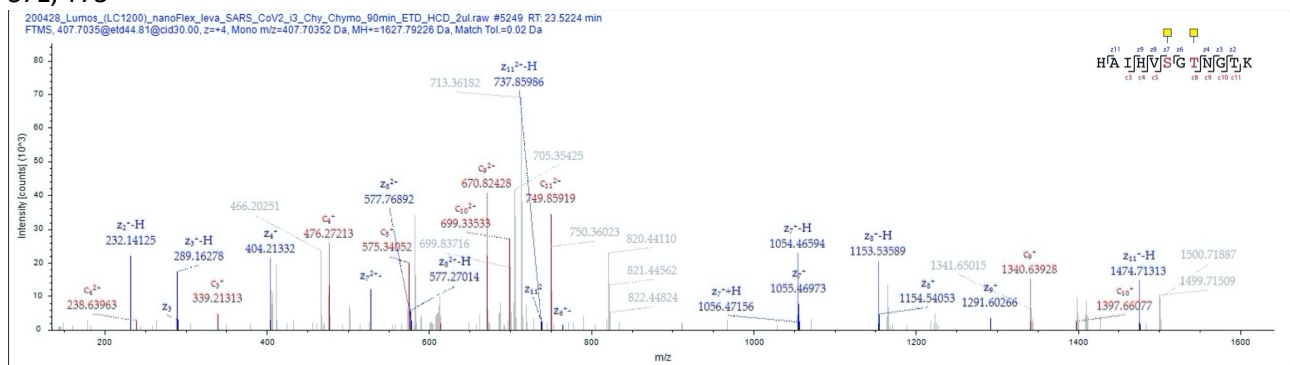

**T73, T76**

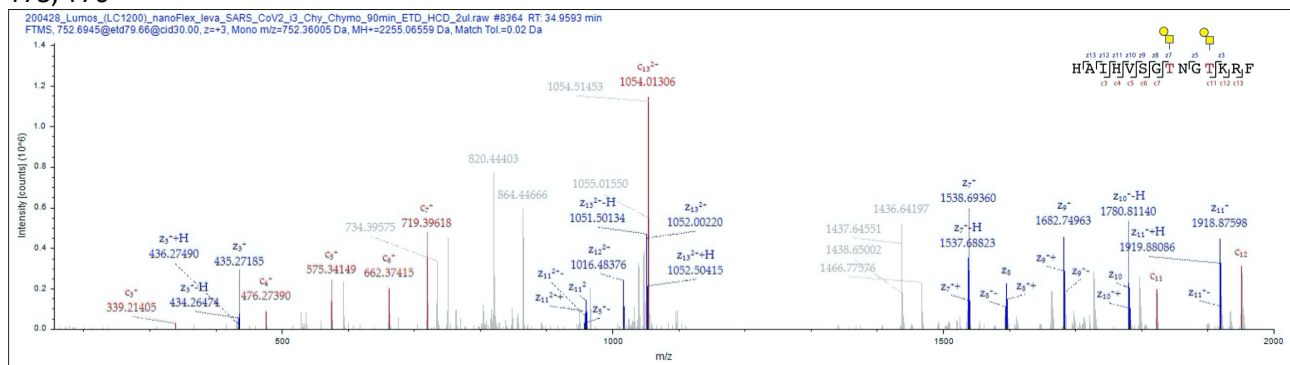

**94-95 (1x)**

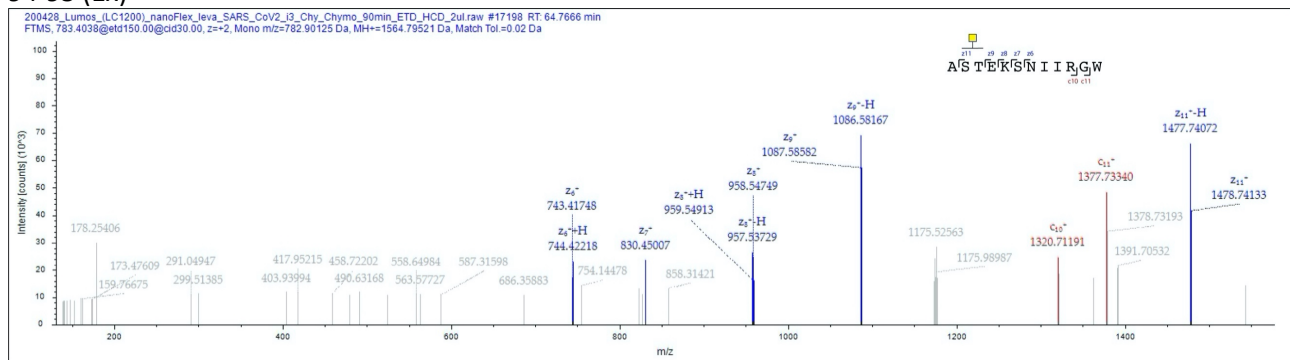

### T124

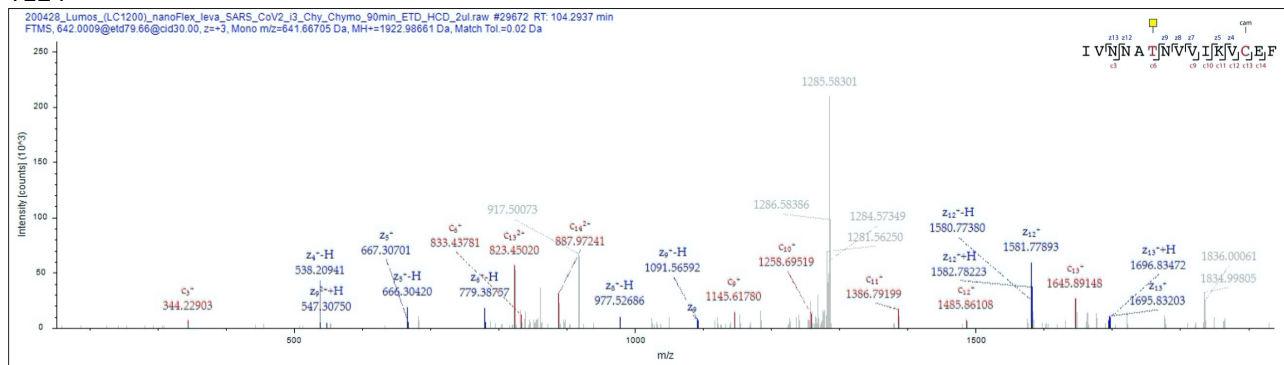

### S151

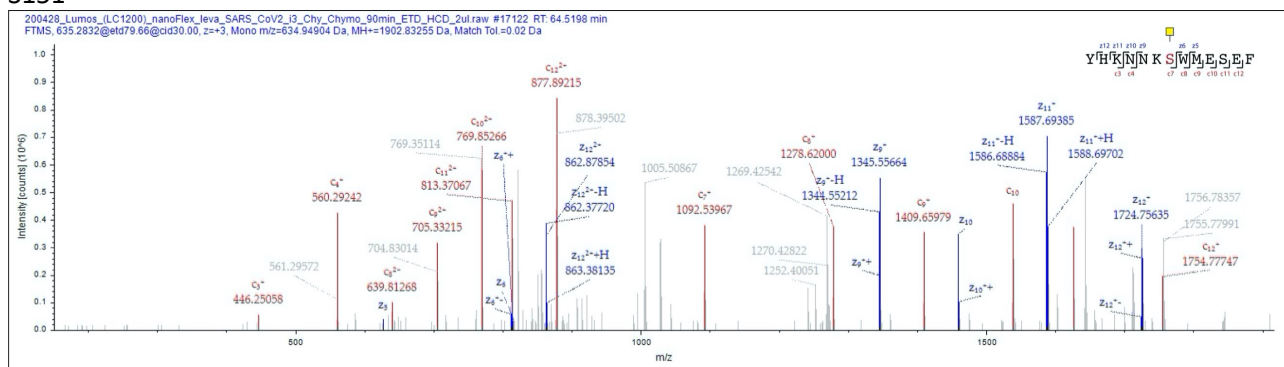

### T315

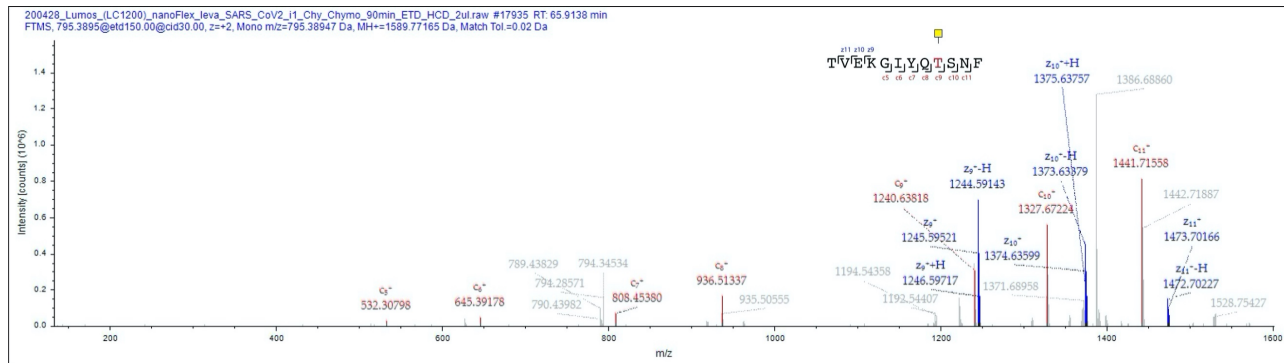

### T323

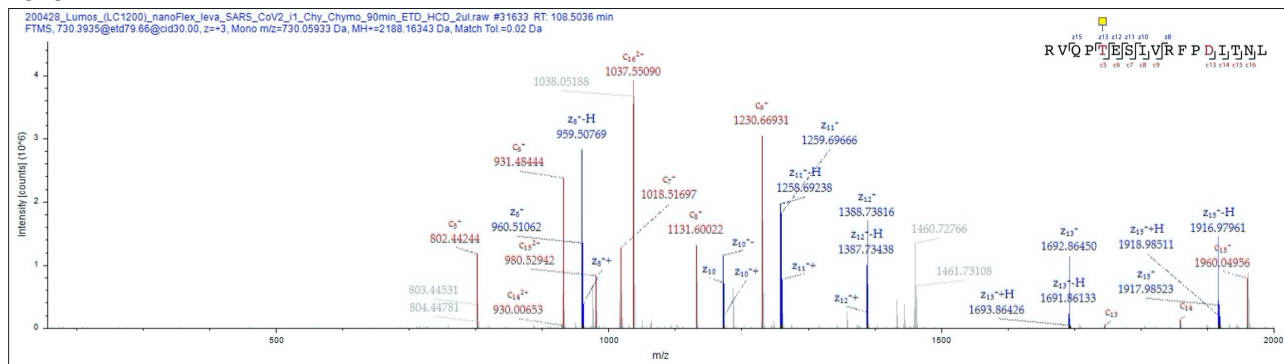

### T333

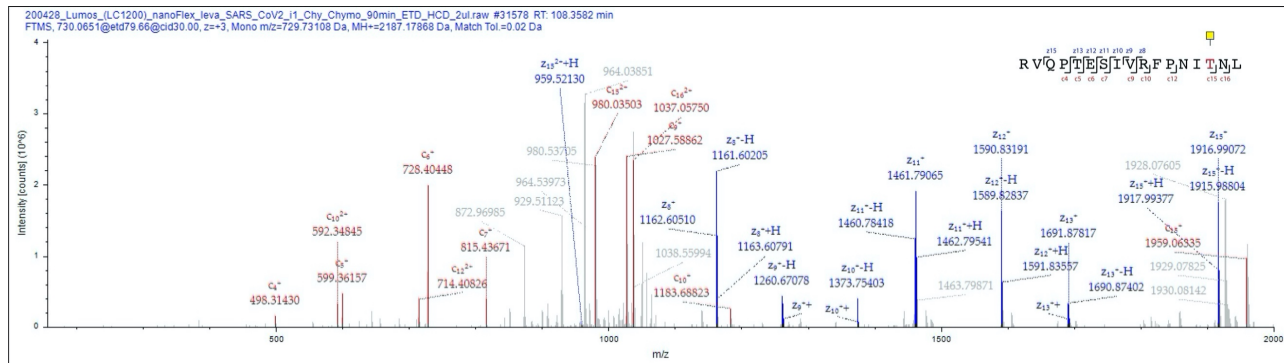

### T345

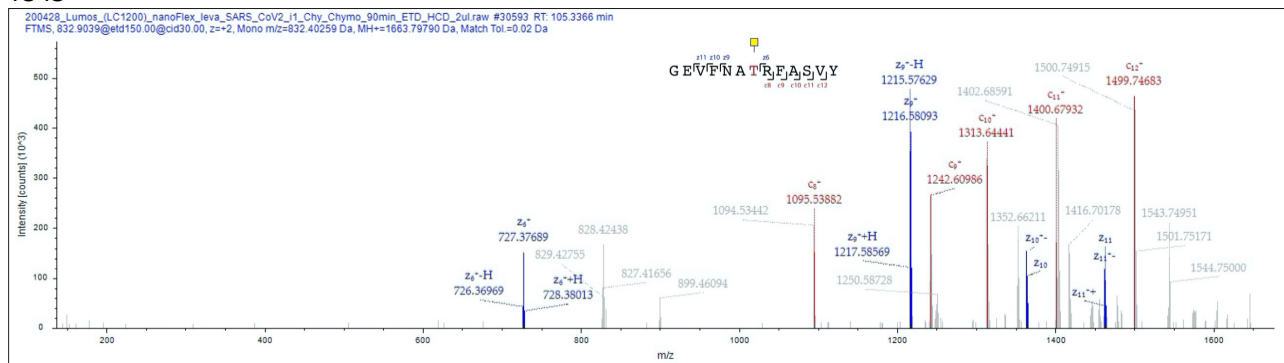

### T415

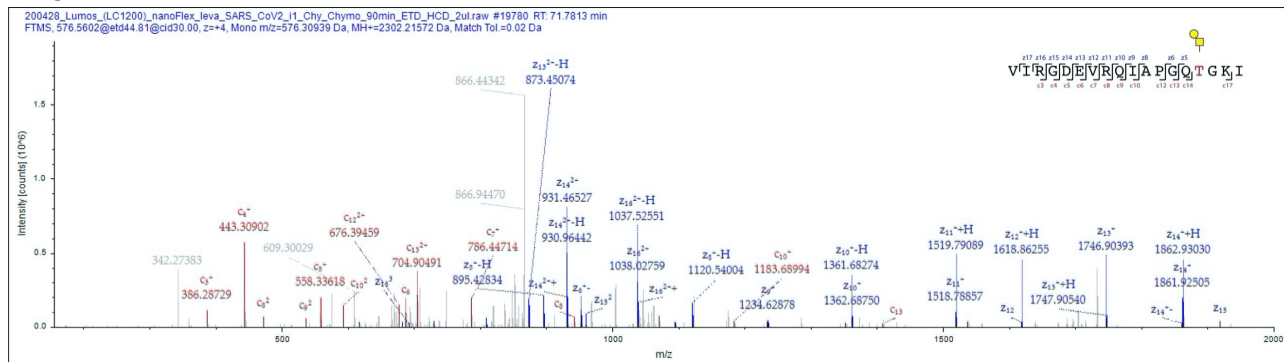

### T478

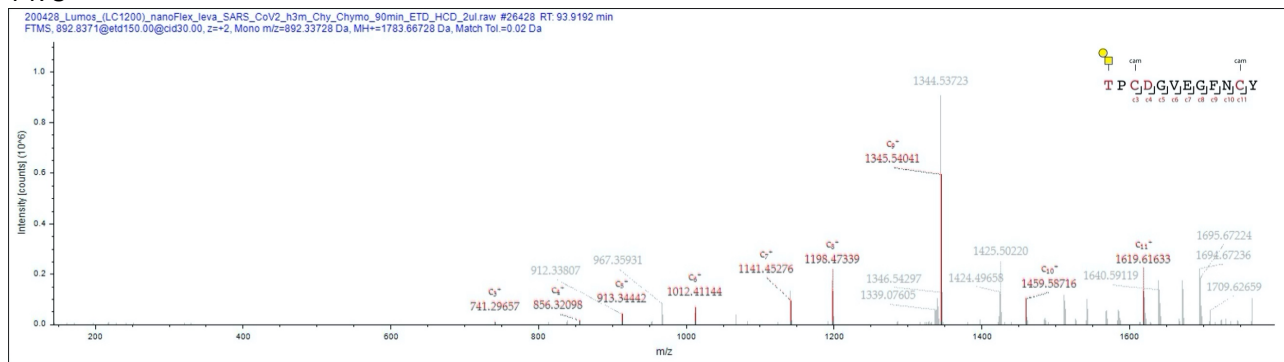

### T523

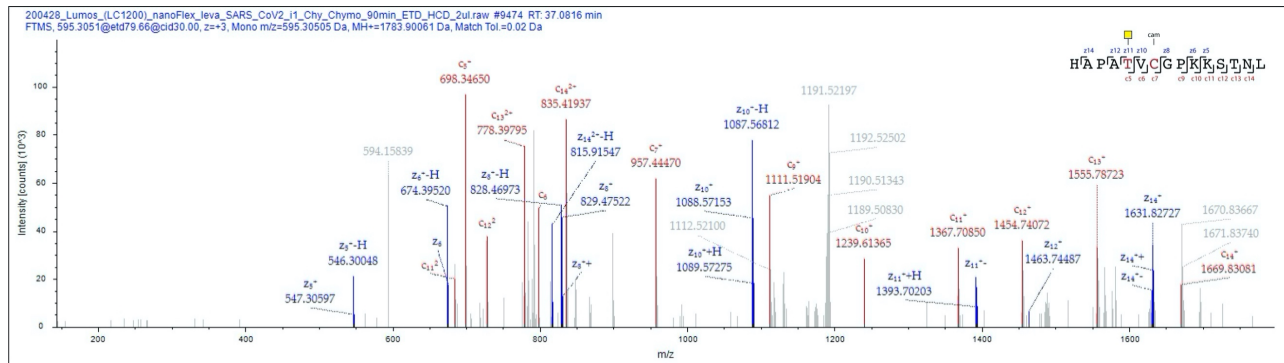

### T618

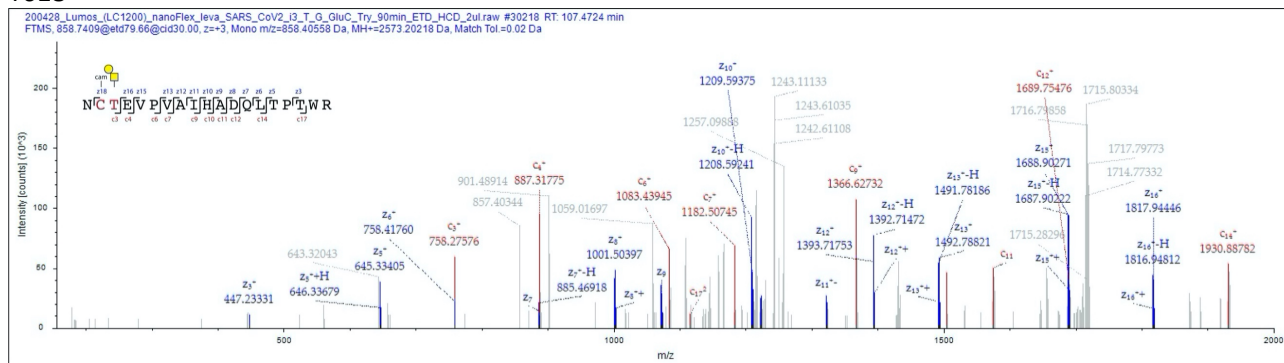

### T676, T678

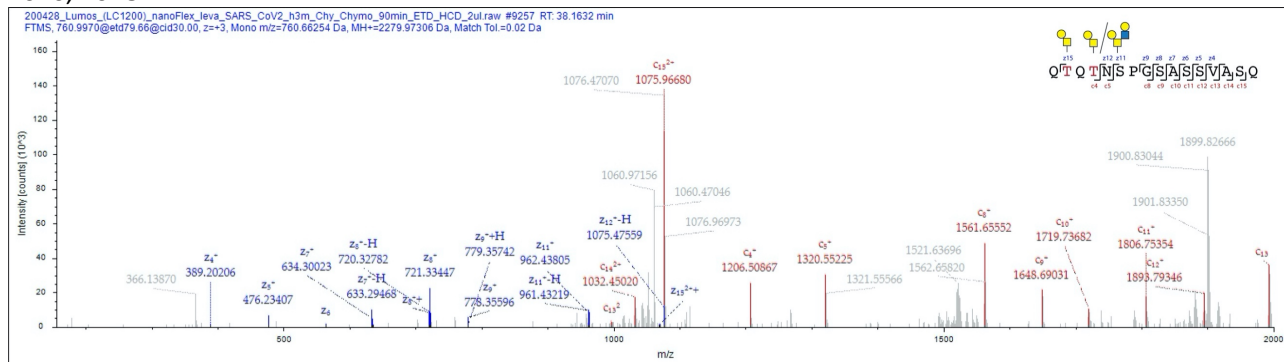

### S803

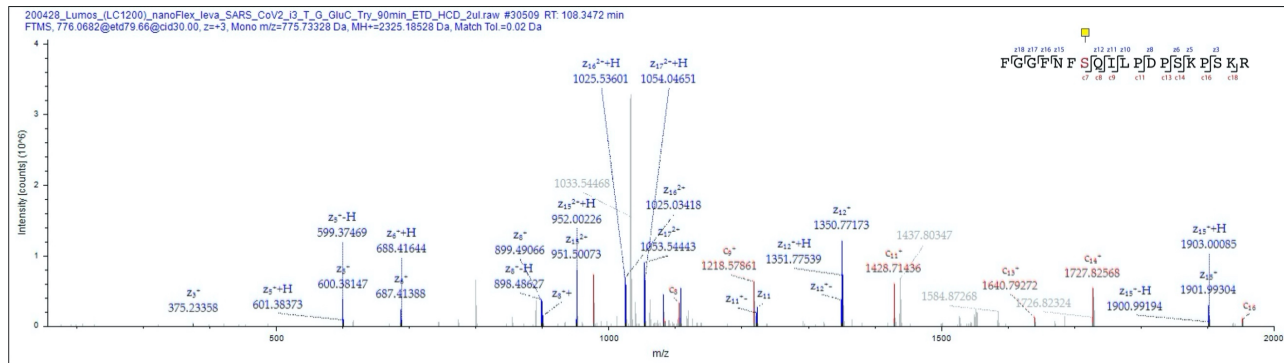

### T1076, T1077

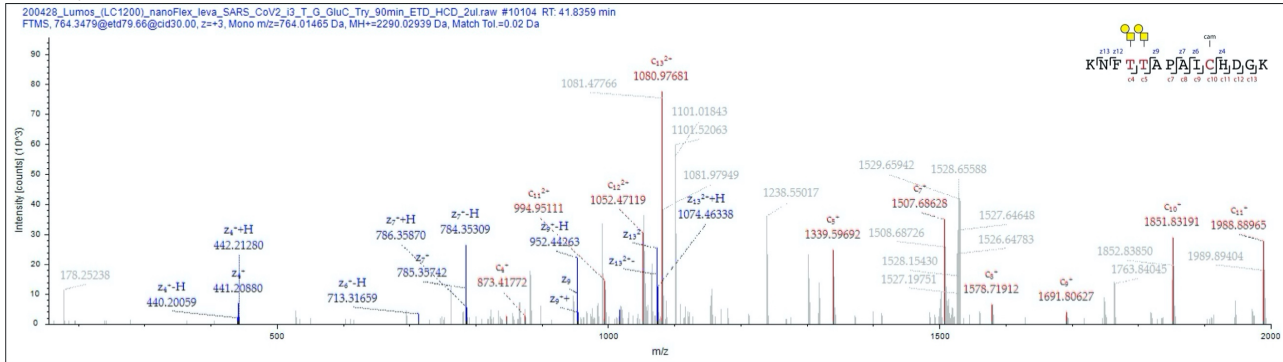

### T1097

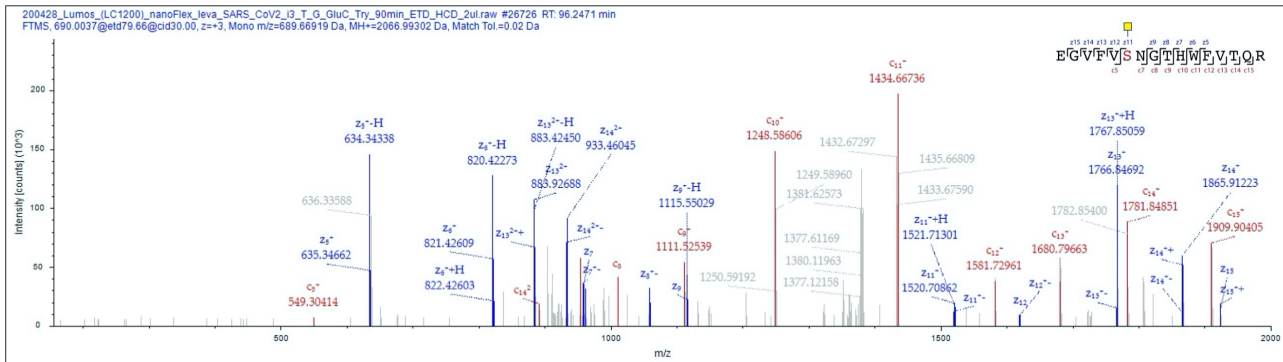

### T1097, T1100

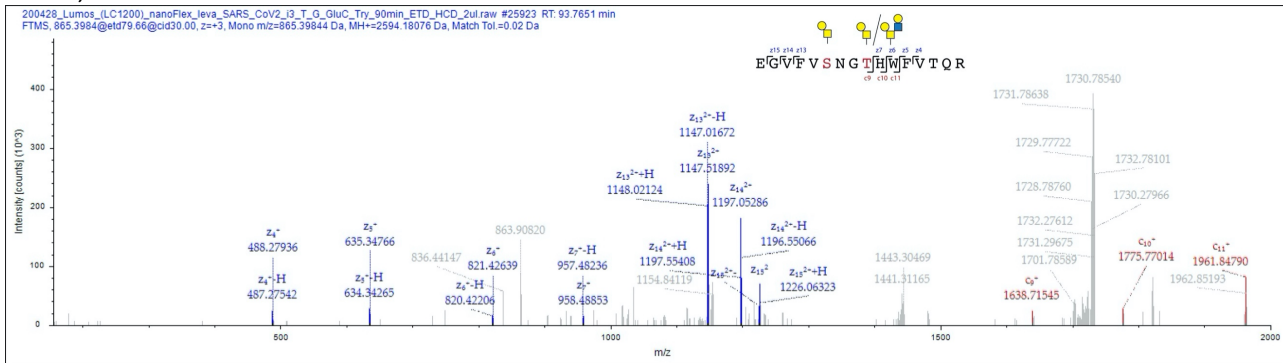

Supplement: s1 [file s1]
