# Supplementary material for: Site-Specific O-Glycosylation Analysis of SARS-CoV-2 Spike Protein Produced in Insect and Human Cells
Source: MDPI journal article supplement (doi:10.3390/v13040551), 2021-03-25

# Fragment Ion View

Project name: 20200330COV19  
Sample name: 20200416\_COV19-double\_1  
Created date: 2020-04-18 15:22:56.0  
Search name:  
Activation type: CID

Peptide sequence: K.DFGGFNFS(203.079373)QILPDPSK.P  
Scan number: 55714  
Calculated M+H: 1971.9335  
Measured M+H: 1971.9445  
Charge state: 2  
File name: 20200416\_COV19-double\_1  
search type: light

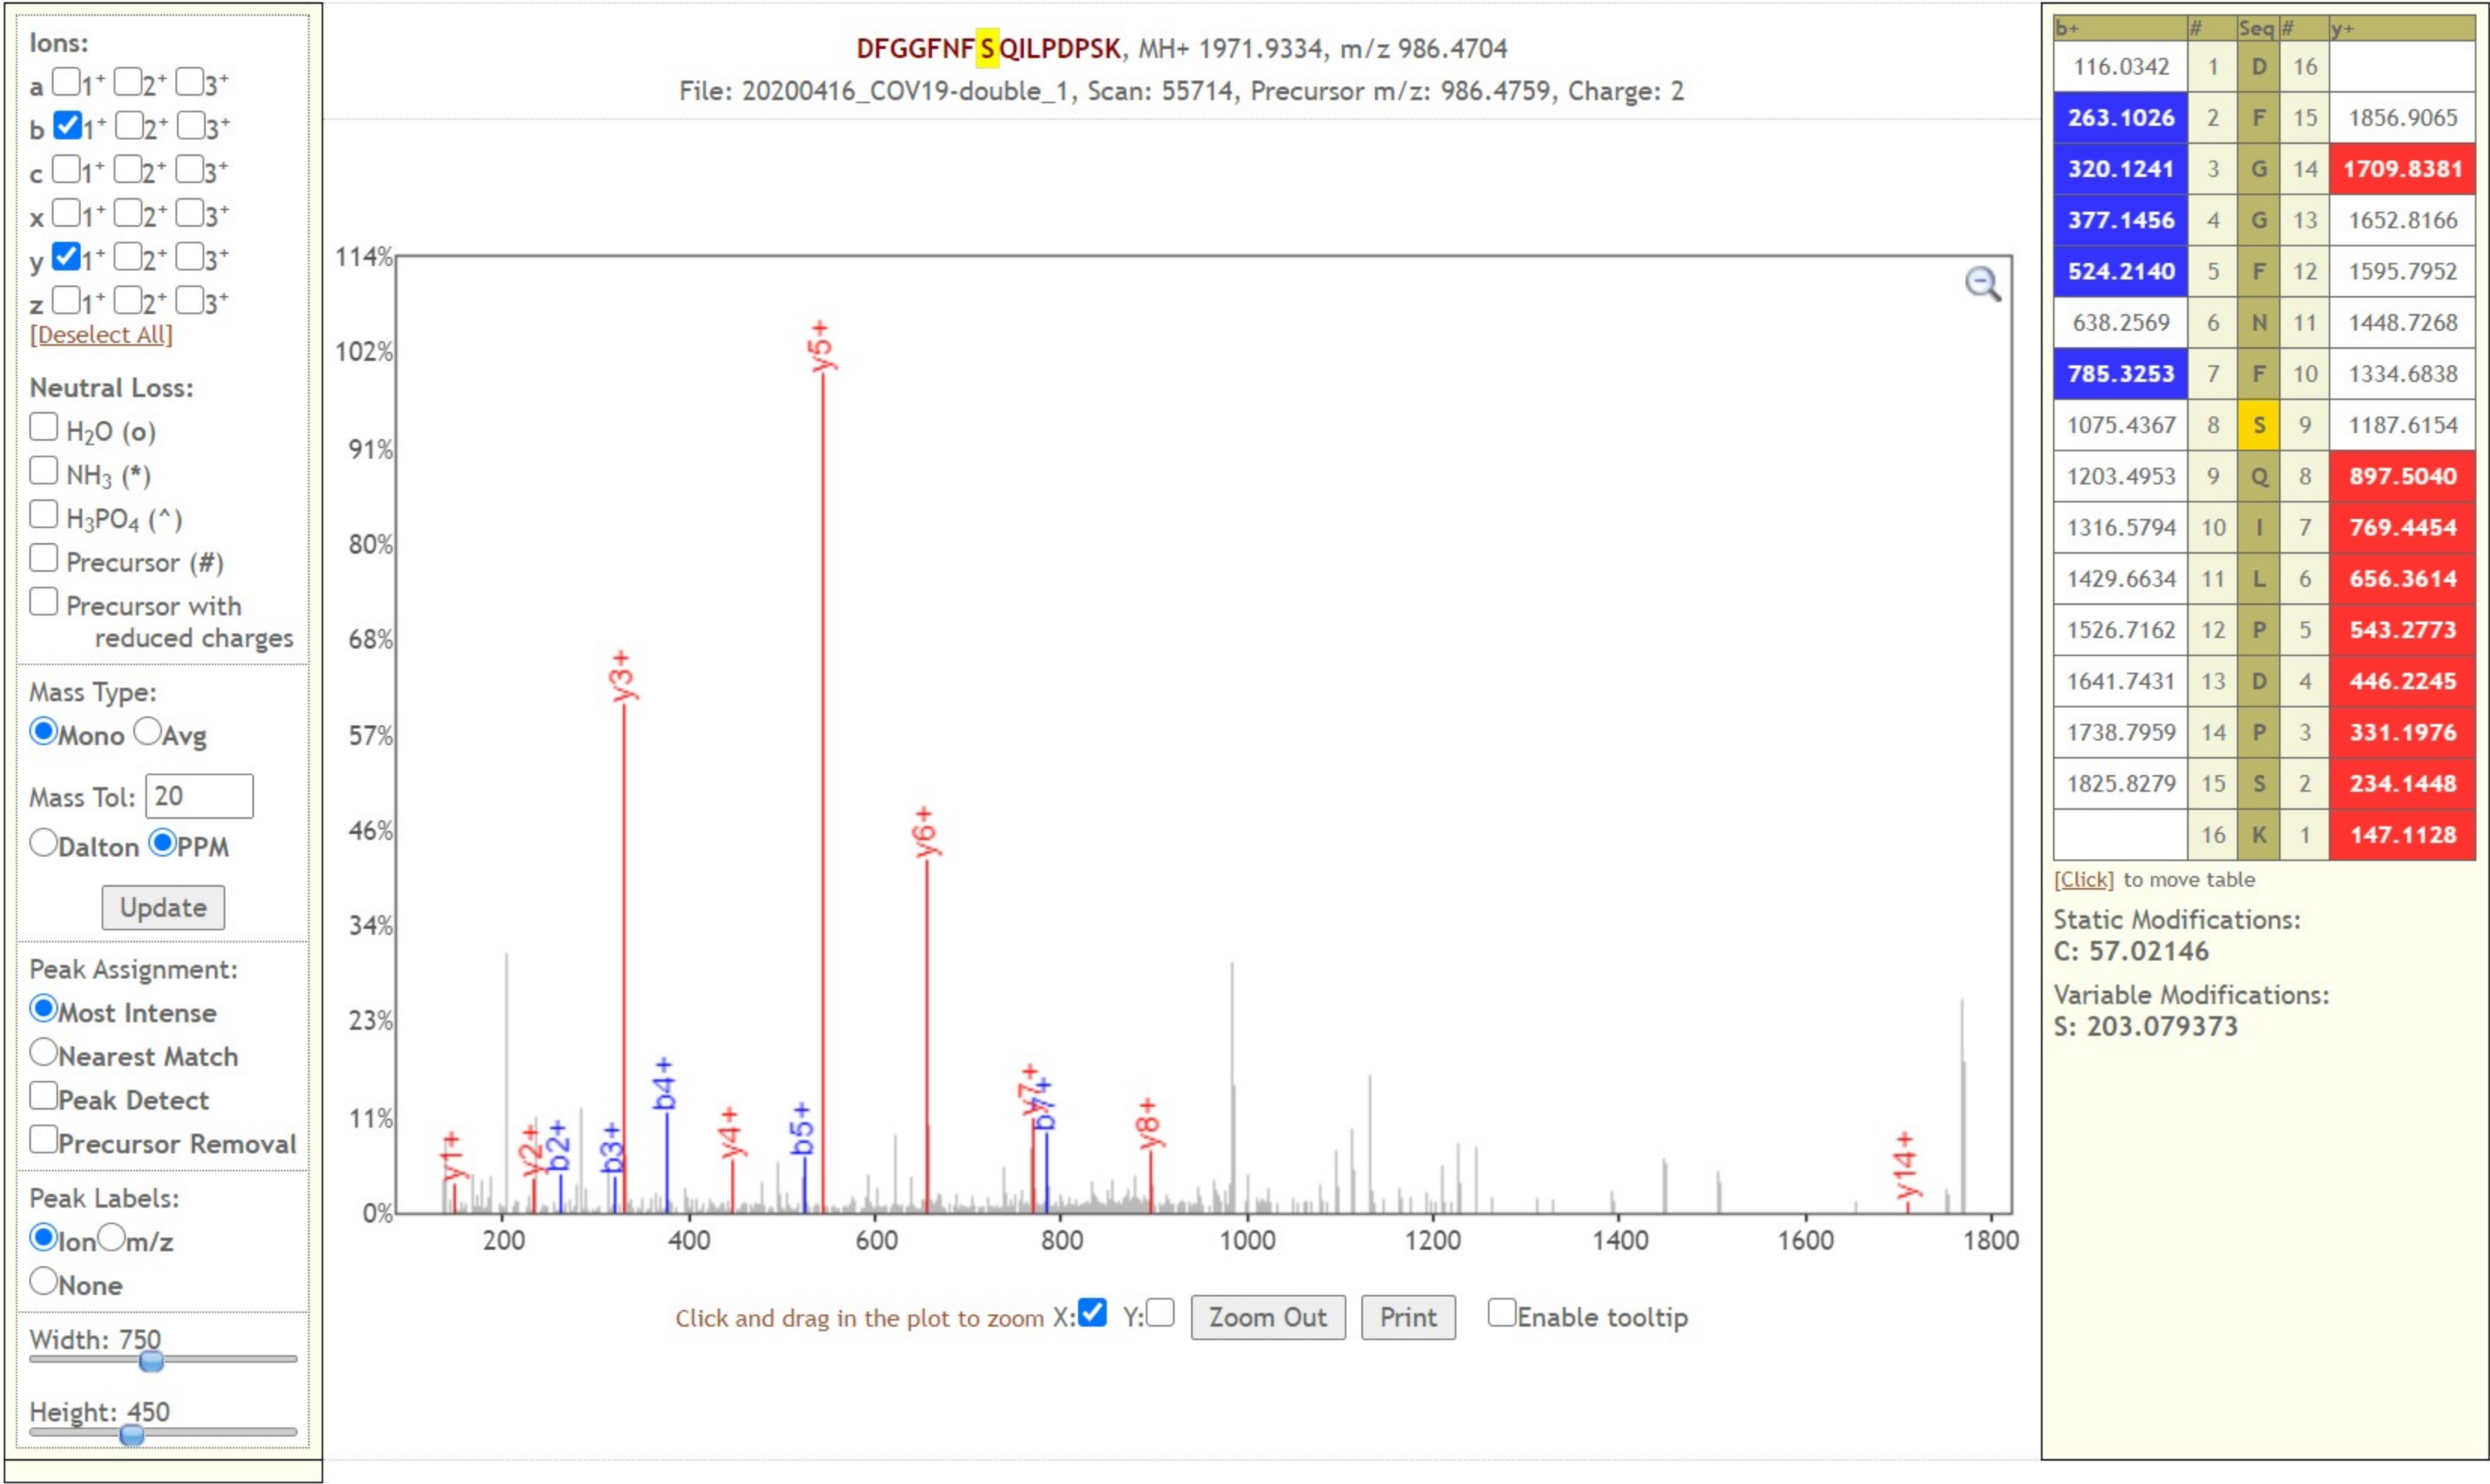

Supplement: s1 [file s1]
