# Supplementary material for: Site-Specific O-Glycosylation Analysis of SARS-CoV-2 Spike Protein Produced in Insect and Human Cells
Source: MDPI journal article supplement (doi:10.3390/v13040551), 2021-03-25
Supplement: s1 [file s1]

Fragment Ion View

Project name: 20200330COV19  
Sample name: 20200416\_COV19-double\_1  
Created date: 2020-04-18 15:22:56.0  
Search name:  
Activation type: CID

Peptide sequence: R.SSVLHSTQDLFLPFFSNVT(203.079373)W.F  
Scan number: 56688  
Calculated M+H: 2528.2344  
Measured M+H: 2528.2502  
Charge state: 2  
File name: 20200416\_COV19-double\_1  
search type: light

Ions:  
a ☐1+ ☐2+ ☐3+  
b ☒1+ ☐2+ ☐3+  
c ☐1+ ☐2+ ☐3+  
x ☐1+ ☐2+ ☐3+  
y ☒1+ ☐2+ ☐3+  
z ☐1+ ☐2+ ☐3+  
[\[Deselect All\]](#)

Neutral Loss:  
☐ H<sub>2</sub>O (o)  
☐ NH<sub>3</sub> (\*)  
☐ H<sub>3</sub>PO<sub>4</sub> (^)  
☐ Precursor (#)  
☐ Precursor with reduced charges

Mass Type:  
☒ Mono ☐ Avg  
Mass Tol:   
☐ Dalton ☒ PPM

Peak Assignment:  
☒ Most Intense  
☐ Nearest Match  
☐ Peak Detect  
☐ Precursor Removal

Peak Labels:  
☒ Ion ☐ m/z  
☐ None  
Width:   
Height:

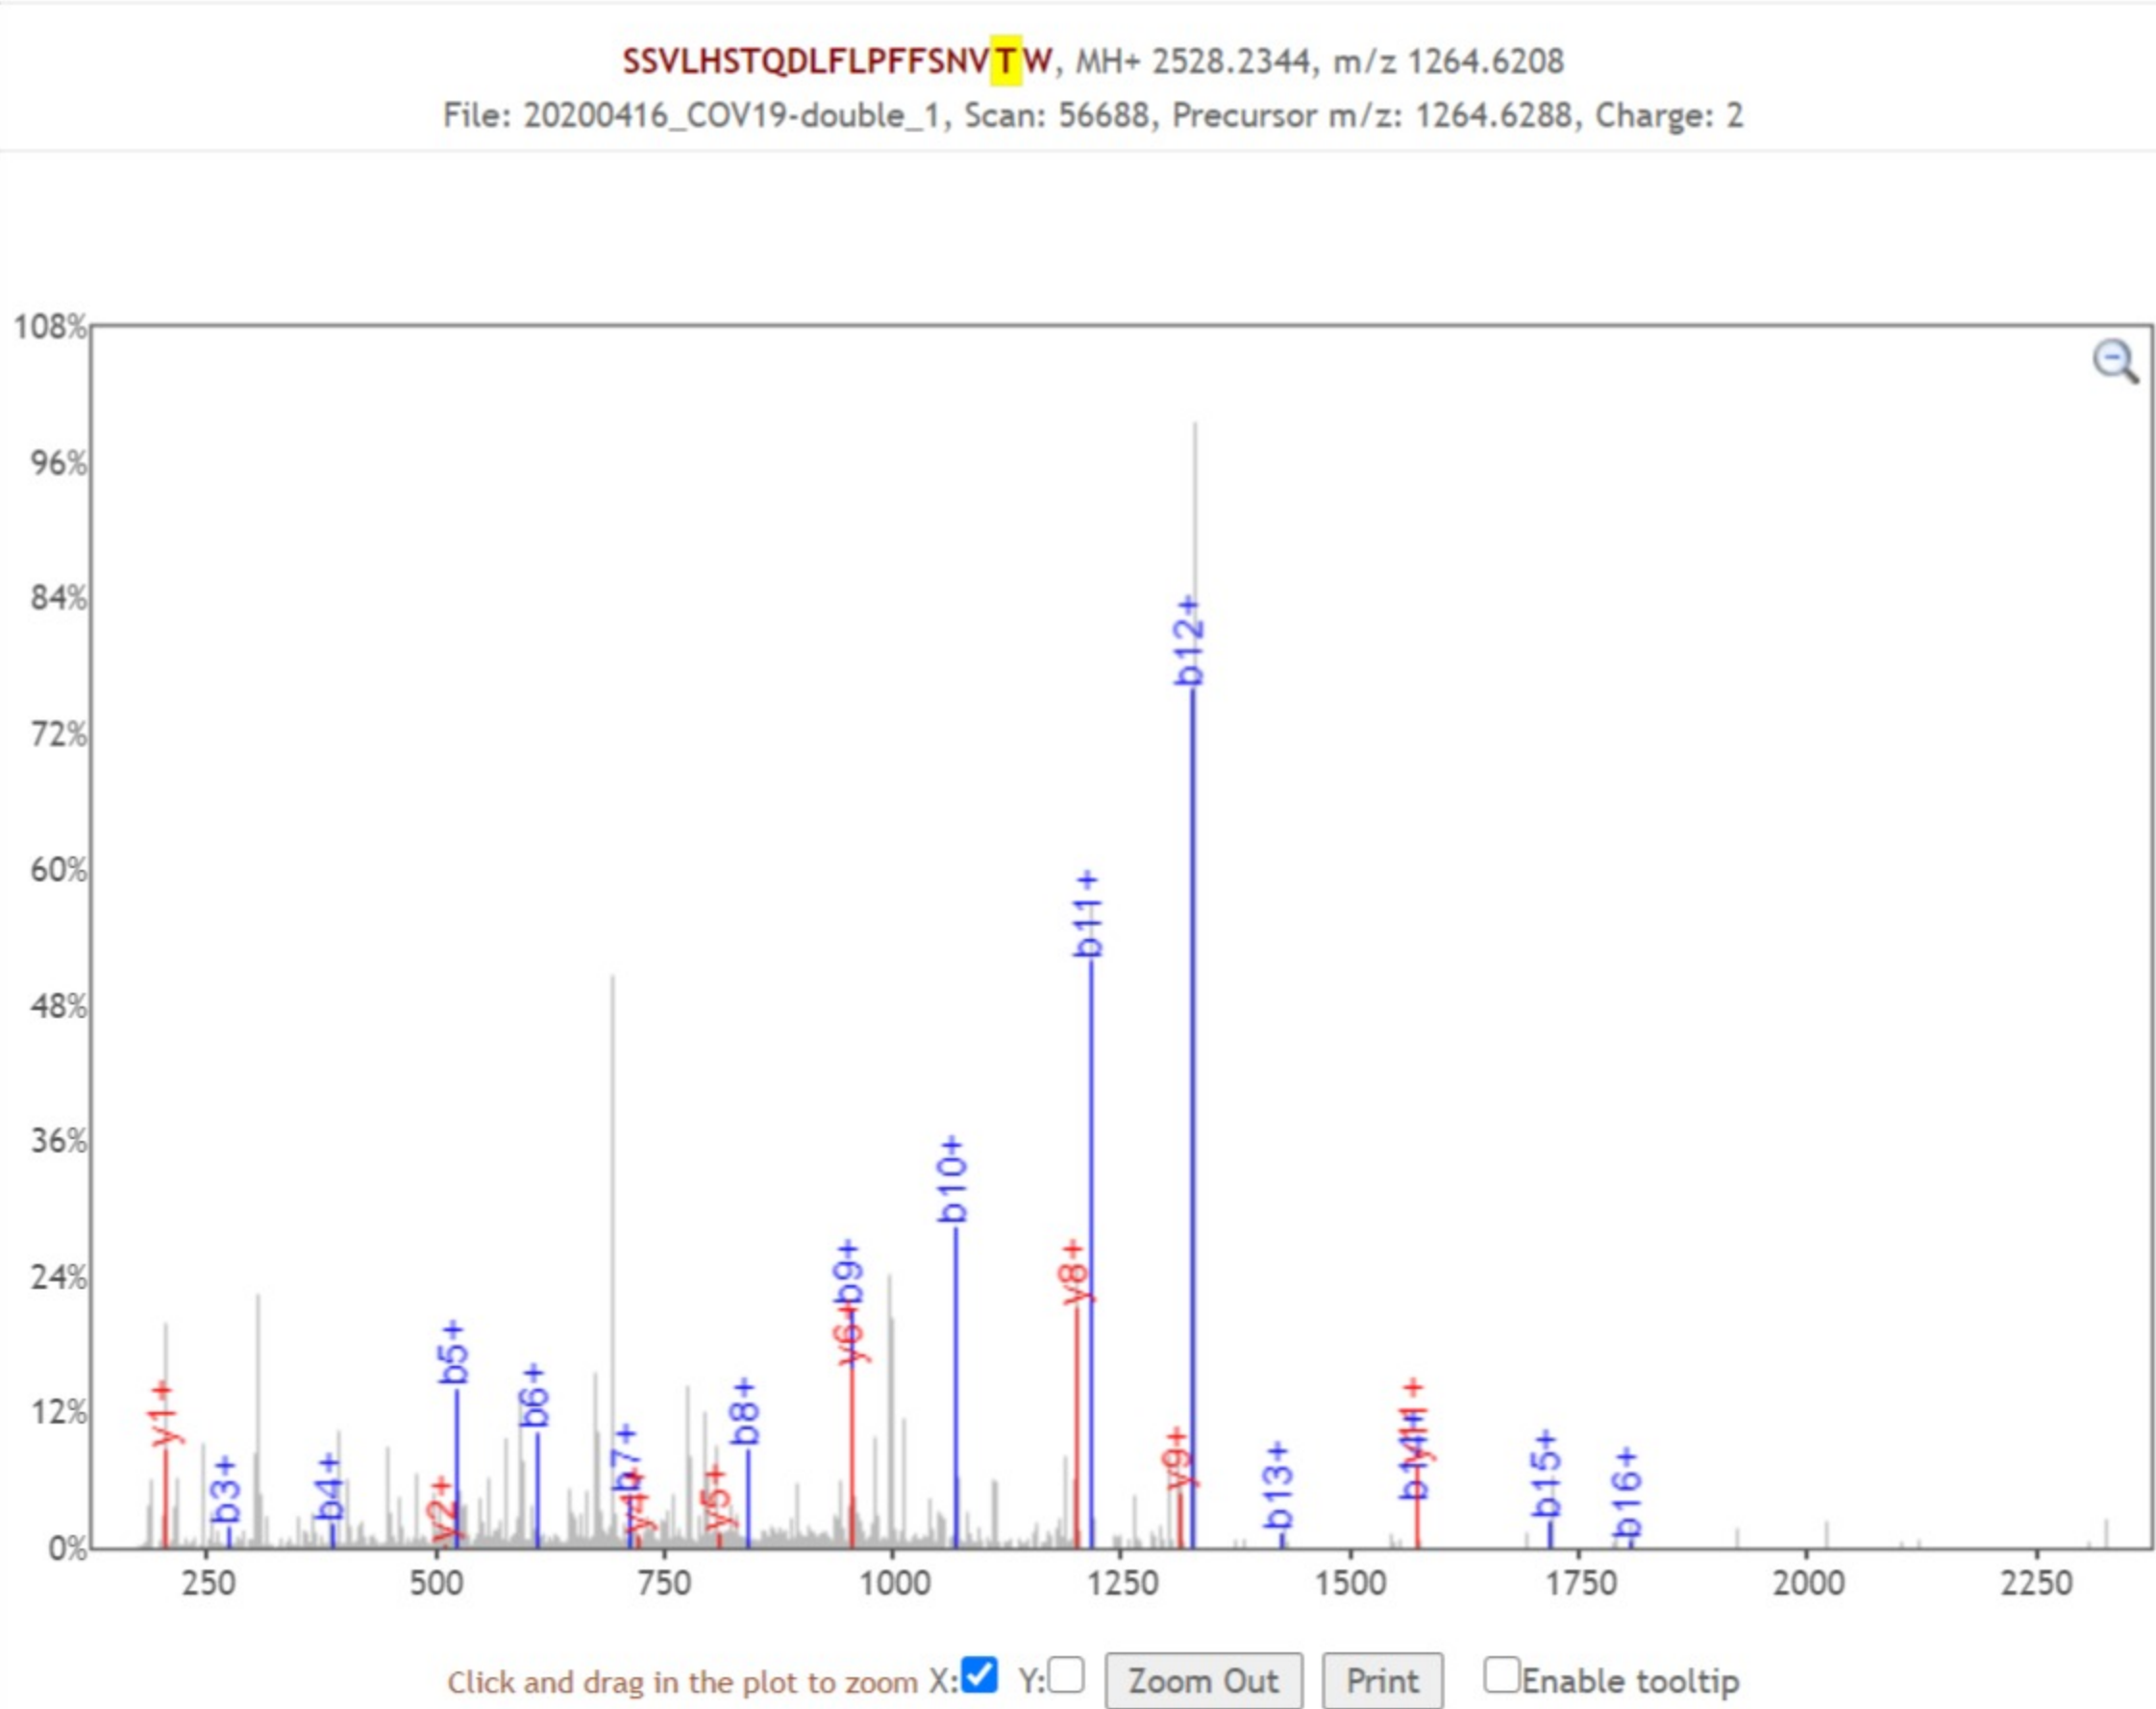

| b+        | #  | Seq | #  | y+        |
|-----------|----|-----|----|-----------|
| 88.0393   | 1  | S   | 20 |           |
| 175.0713  | 2  | S   | 19 | 2441.2024 |
| 274.1397  | 3  | V   | 18 | 2354.1703 |
| 387.2238  | 4  | L   | 17 | 2255.1019 |
| 524.2827  | 5  | H   | 16 | 2142.0178 |
| 611.3148  | 6  | S   | 15 | 2004.9589 |
| 712.3624  | 7  | T   | 14 | 1917.9269 |
| 840.4210  | 8  | Q   | 13 | 1816.8792 |
| 955.4480  | 9  | D   | 12 | 1688.8207 |
| 1068.5320 | 10 | L   | 11 | 1573.7937 |
| 1215.6004 | 11 | F   | 10 | 1460.7096 |
| 1328.6845 | 12 | L   | 9  | 1313.6412 |
| 1425.7373 | 13 | P   | 8  | 1200.5572 |
| 1572.8057 | 14 | F   | 7  | 1103.5044 |
| 1719.8741 | 15 | F   | 6  | 956.4360  |
| 1806.9061 | 16 | S   | 5  | 809.3676  |
| 1920.9490 | 17 | N   | 4  | 722.3355  |
| 2020.0175 | 18 | V   | 3  | 608.2926  |
| 2324.1445 | 19 | T   | 2  | 509.2242  |
|           | 20 | W   | 1  | 205.0972  |

[\[Click\]](#) to move table

Static Modifications:  
C: 57.02146

Variable Modifications:  
T: 203.079373
