# Supplementary material for: Site-Specific O-Glycosylation Analysis of SARS-CoV-2 Spike Protein Produced in Insect and Human Cells
Source: MDPI journal article supplement (doi:10.3390/v13040551), 2021-03-25
Supplement: s1 [file s1]

# Fragment Ion View

Project name: 20200330COV19  
Sample name: 20200416\_COV19-double\_2  
Created date: 2020-04-18 15:22:56.0  
Search name:  
Activation type: CID

Peptide sequence: F.SALEPLVDLPIGINIT(203.079373).R  
Scan number: 56315  
Calculated M+H: 1868.0262  
Measured M+H: 1868.0323  
Charge state: 2  
File name: 20200416\_COV19-double\_2  
search type: light

### Ions:

- a ☐ 1+ ☐ 2+ ☐ 3+  
b ☒ 1+ ☐ 2+ ☐ 3+  
c ☐ 1+ ☐ 2+ ☐ 3+  
x ☐ 1+ ☐ 2+ ☐ 3+  
y ☒ 1+ ☐ 2+ ☐ 3+  
z ☐ 1+ ☐ 2+ ☐ 3+

[\[Deselect All\]](#)

### Neutral Loss:

- ☐ H<sub>2</sub>O (o)  
☐ NH<sub>3</sub> (\*)  
☐ H<sub>3</sub>PO<sub>4</sub> (^)  
☐ Precursor (#)  
☐ Precursor with reduced charges

### Mass Type:

☒ Mono ☐ Avg

Mass Tol:

☐ Dalton ☒ PPM

### Peak Assignment:

- ☒ Most Intense  
☐ Nearest Match  
☐ Peak Detect  
☐ Precursor Removal

### Peak Labels:

☒ Ion ☐ m/z  
☐ None

Width:

Height:

SALEPLVDLPIGINIT, MH+ 1868.0263, m/z 934.5168

File: 20200416\_COV19-double\_2, Scan: 56315, Precursor m/z: 934.51984, Charge: 2

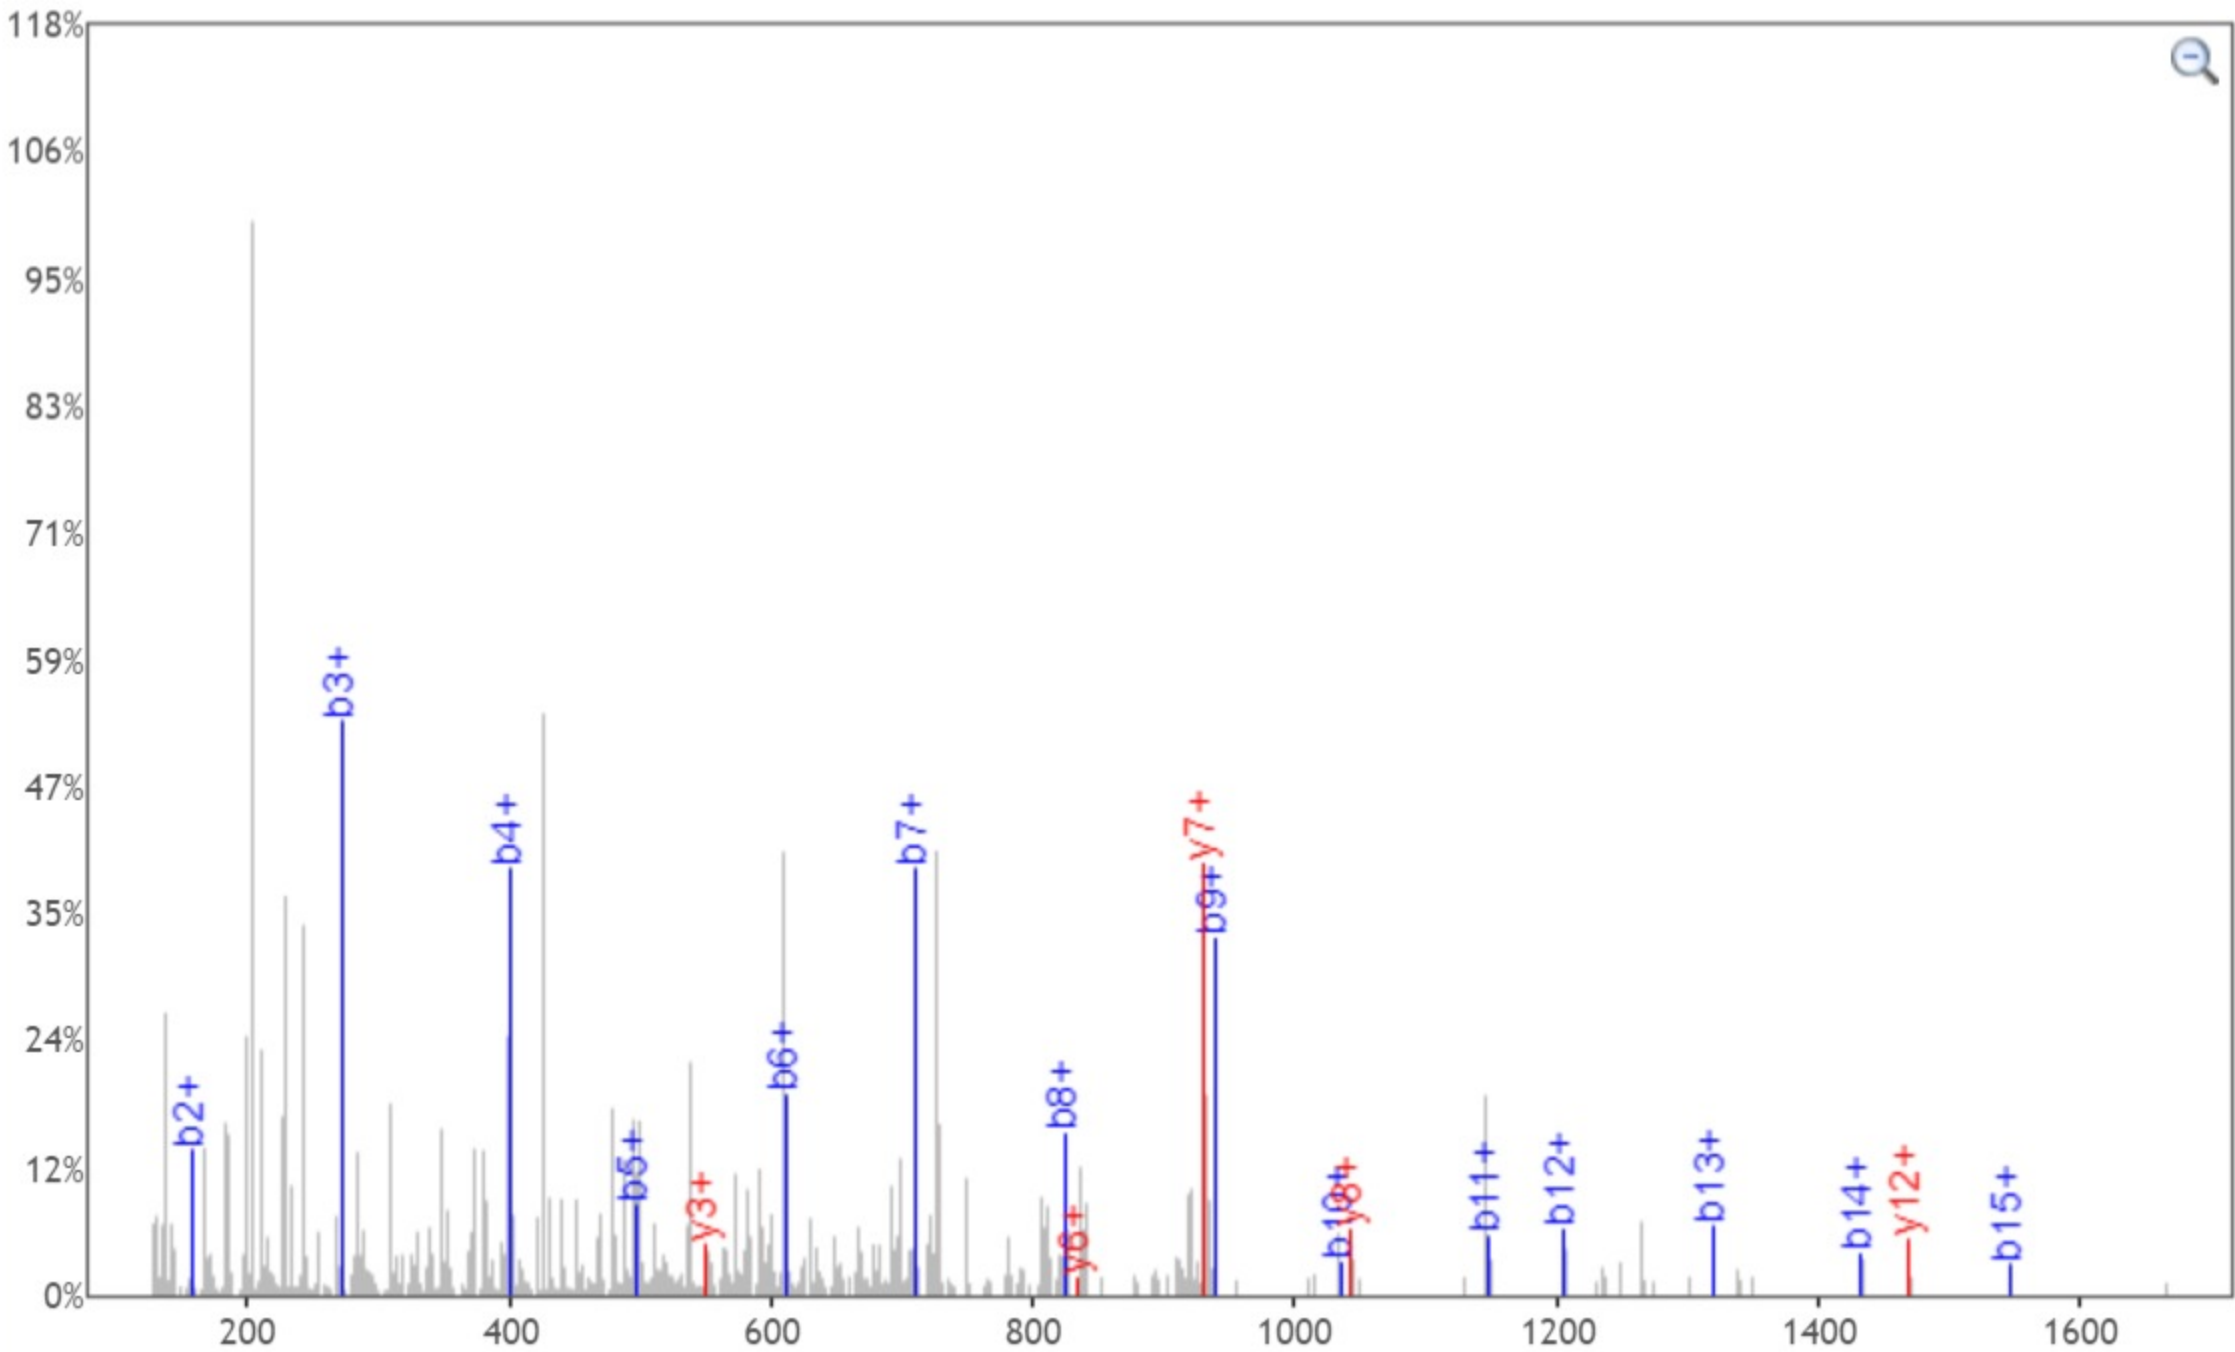

Click and drag in the plot to zoom X: ☒ Y: ☐

☐ Enable tooltip

| b+        | #  | Seq | #  | y+        |
|-----------|----|-----|----|-----------|
| 88.0393   | 1  | S   | 16 |           |
| 159.0764  | 2  | A   | 15 | 1780.9943 |
| 272.1605  | 3  | L   | 14 | 1709.9571 |
| 401.2031  | 4  | E   | 13 | 1596.8731 |
| 498.2558  | 5  | P   | 12 | 1467.8305 |
| 611.3399  | 6  | L   | 11 | 1370.7777 |
| 710.4083  | 7  | V   | 10 | 1257.6937 |
| 825.4353  | 8  | D   | 9  | 1158.6252 |
| 938.5193  | 9  | L   | 8  | 1043.5983 |
| 1035.5721 | 10 | P   | 7  | 930.5142  |
| 1148.6562 | 11 | I   | 6  | 833.4615  |
| 1205.6776 | 12 | G   | 5  | 720.3774  |
| 1318.7617 | 13 | I   | 4  | 663.3559  |
| 1432.8046 | 14 | N   | 3  | 550.2719  |
| 1545.8887 | 15 | I   | 2  | 436.2290  |
|           | 16 | T   | 1  | 323.1449  |

[\[Click\]](#) to move table

Static Modifications:

C: 57.02146

Variable Modifications:

T: 203.079373
