# Supplementary material for: Site-Specific O-Glycosylation Analysis of SARS-CoV-2 Spike Protein Produced in Insect and Human Cells
Source: MDPI journal article supplement (doi:10.3390/v13040551), 2021-03-25
Supplement: s1 [file s1]

Fragment Ion View

Project name: 20200330COV19  
Sample name: 20200416\_COV19-double\_1  
Created date: 2020-04-18 15:22:56.0  
Search name:  
Activation type: CID

Peptide sequence: R.VYSSANN(2.988261)CTFEYVSQPFLMDLEGK.Q  
Scan number: 56061  
Calculated M+H: 2802.2522  
Measured M+H: 2802.2622  
Charge state: 3  
File name: 20200416\_COV19-double\_1  
search type: light

Ions:  
a ☐1+ ☐2+ ☐3+  
b ☒1+ ☒2+ ☐3+  
c ☐1+ ☐2+ ☐3+  
x ☐1+ ☐2+ ☐3+  
y ☒1+ ☒2+ ☐3+  
z ☐1+ ☐2+ ☐3+  
[\[Deselect All\]](#)

Neutral Loss:  
☐ H<sub>2</sub>O (o)  
☐ NH<sub>3</sub> (\*)  
☐ H<sub>3</sub>PO<sub>4</sub> (^)  
☐ Precursor (#)  
☐ Precursor with reduced charges

Mass Type:  
☒ Mono ☐ Avg  
Mass Tol:   
☐ Dalton ☒ PPM  

Update

Peak Assignment:  
☒ Most Intense  
☐ Nearest Match  
☐ Peak Detect  
☐ Precursor Removal

Peak Labels:  
☒ Ion ☐ m/z  
☐ None

Width:   
Height:

VYSSANNCTFEYVSQPFLMDLEGK, MH+ 2802.2523, m/z 934.7556  
File: 20200416\_COV19-double\_1, Scan: 56061, Precursor m/z: 934.7589, Charge: 3

Click and drag in the plot to zoom X: ☒ Y: ☐

Zoom Out

Print

☐ Enable tooltip

| b+        | b2+       | #  | Seq | #  | y+        | y2+       |
|-----------|-----------|----|-----|----|-----------|-----------|
| 100.0757  | 50.5415   | 1  | V   | 24 |           |           |
| 263.1390  | 132.0731  | 2  | Y   | 23 | 2703.1839 | 1352.0956 |
| 350.1710  | 175.5892  | 3  | S   | 22 | 2540.1206 | 1270.5639 |
| 437.2031  | 219.1052  | 4  | S   | 21 | 2453.0885 | 1227.0479 |
| 508.2402  | 254.6237  | 5  | A   | 20 | 2366.0565 | 1183.5319 |
| 622.2831  | 311.6452  | 6  | N   | 19 | 2295.0194 | 1148.0133 |
| 739.3143  | 370.1608  | 7  | N   | 18 | 2180.9765 | 1090.9919 |
| 899.3449  | 450.1761  | 8  | C   | 17 | 2063.9453 | 1032.4763 |
| 1000.3926 | 500.7000  | 9  | T   | 16 | 1903.9146 | 952.4610  |
| 1147.4610 | 574.2342  | 10 | F   | 15 | 1802.8669 | 901.9371  |
| 1276.5036 | 638.7555  | 11 | E   | 14 | 1655.7985 | 828.4029  |
| 1439.5670 | 720.2871  | 12 | Y   | 13 | 1526.7559 | 763.8816  |
| 1538.6354 | 769.8213  | 13 | V   | 12 | 1363.6926 | 682.3499  |
| 1625.6674 | 813.3373  | 14 | S   | 11 | 1264.6242 | 632.8157  |
| 1753.7260 | 877.3666  | 15 | Q   | 10 | 1177.5922 | 589.2997  |
| 1850.7787 | 925.8930  | 16 | P   | 9  | 1049.5336 | 525.2704  |
| 1997.8472 | 999.4272  | 17 | F   | 8  | 952.4808  | 476.7441  |
| 2110.9312 | 1055.9693 | 18 | L   | 7  | 805.4124  | 403.2098  |
| 2241.9717 | 1121.4895 | 19 | M   | 6  | 692.3284  | 346.6678  |
| 2356.9987 | 1179.0030 | 20 | D   | 5  | 561.2879  | 281.1476  |
| 2470.0827 | 1235.5450 | 21 | L   | 4  | 446.2609  | 223.6341  |
| 2599.1253 | 1300.0663 | 22 | E   | 3  | 333.1769  | 167.0921  |
| 2656.1468 | 1328.5770 | 23 | G   | 2  | 204.1343  | 102.5708  |
|           |           | 24 | K   | 1  | 147.1128  | 74.0600   |

Static Modifications:  
C: 57.02146

Variable Modifications:  
N: 2.988261
