# Supplementary material for: Site-Specific O-Glycosylation Analysis of SARS-CoV-2 Spike Protein Produced in Insect and Human Cells
Source: MDPI journal article supplement (doi:10.3390/v13040551), 2021-03-25
Supplement: s1 [file s1]

Fragment Ion View

Project name: 20200330COV19  
Sample name: 20200416\_COV19-double\_2  
Created date: 2020-04-18 15:22:56.0  
Search name:  
Activation type: CID

Peptide sequence: F.FSN(2.988261)VTWFHAIHVSGTN(2.988261)GTK.R  
Scan number: 49970  
Calculated M+H: 2109.017  
Measured M+H: 2109.0225  
Charge state: 3  
File name: 20200416\_COV19-double\_2  
search type: light

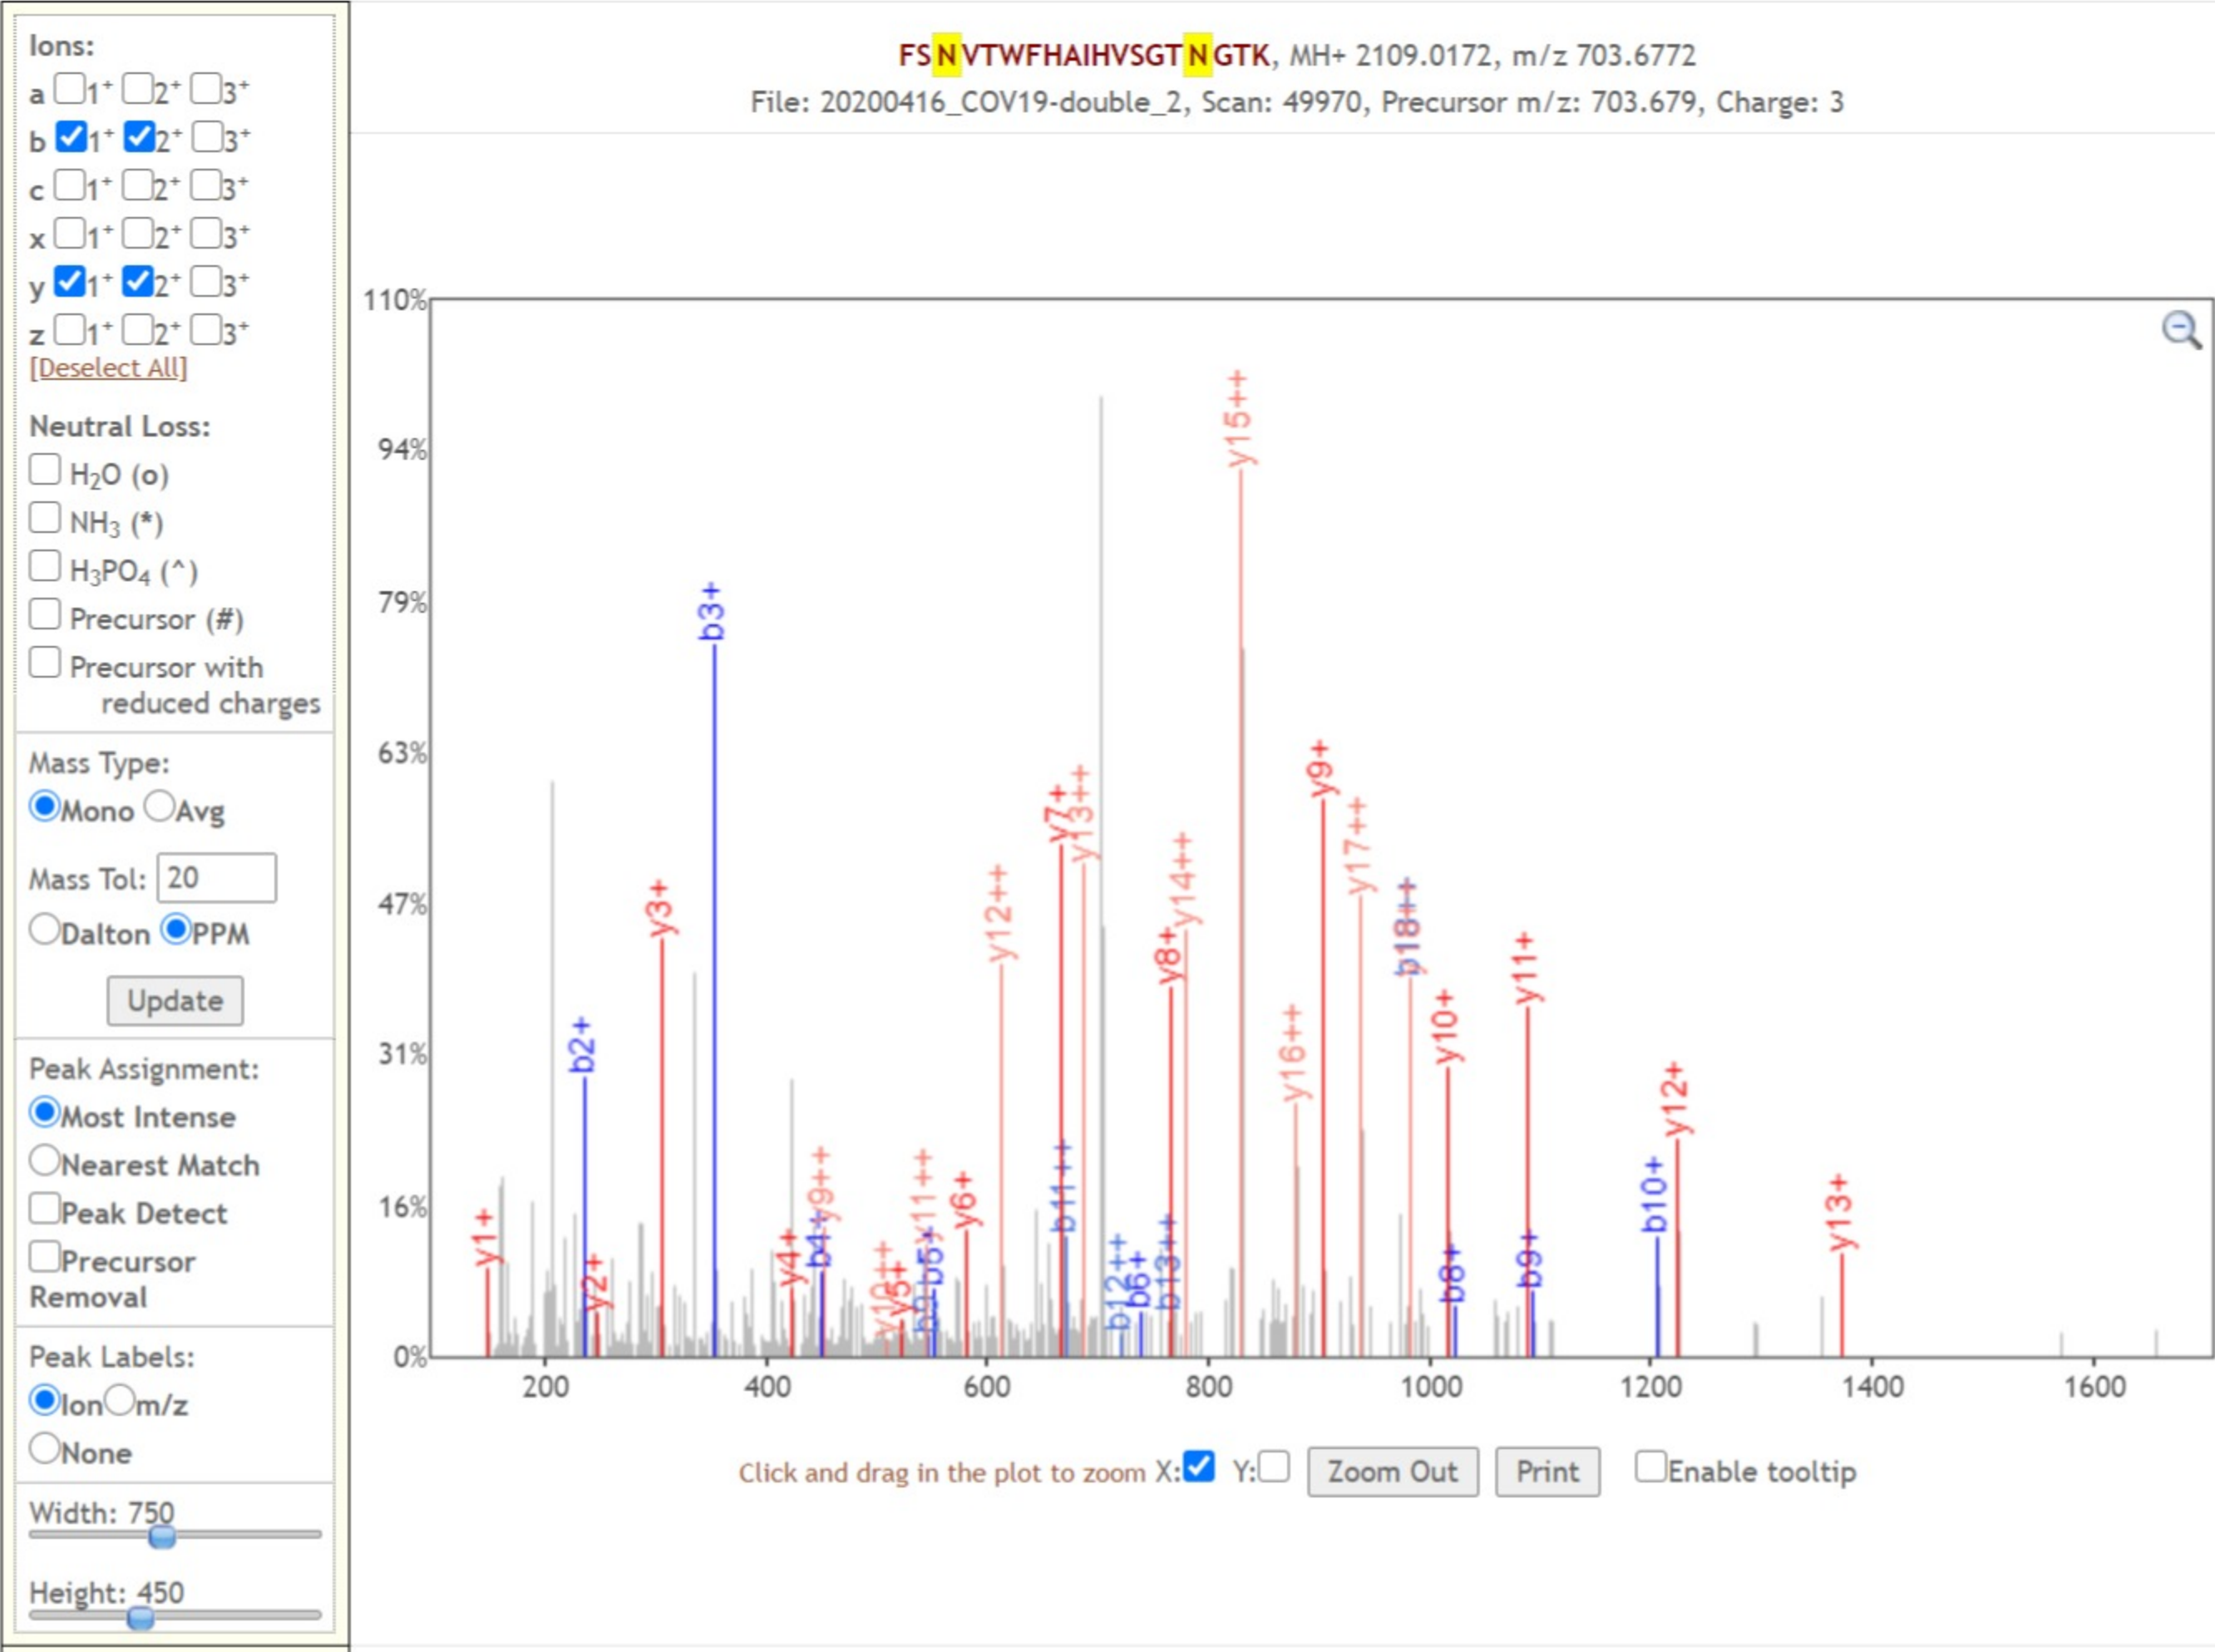

| b+        | b2+      | #  | Seq | #  | y+        | y2+      |
|-----------|----------|----|-----|----|-----------|----------|
| 148.0757  | 74.5415  | 1  | F   | 19 |           |          |
| 235.1077  | 118.0575 | 2  | S   | 18 | 1961.9488 | 981.4780 |
| 352.1389  | 176.5731 | 3  | N   | 17 | 1874.9167 | 937.9620 |
| 451.2073  | 226.1073 | 4  | V   | 16 | 1757.8855 | 879.4464 |
| 552.2550  | 276.6311 | 5  | T   | 15 | 1658.8171 | 829.9122 |
| 738.3343  | 369.6708 | 6  | W   | 14 | 1557.7694 | 779.3884 |
| 885.4027  | 443.2050 | 7  | F   | 13 | 1371.6901 | 686.3487 |
| 1022.4616 | 511.7345 | 8  | H   | 12 | 1224.6217 | 612.8145 |
| 1093.4988 | 547.2530 | 9  | A   | 11 | 1087.5628 | 544.2850 |
| 1206.5828 | 603.7950 | 10 | I   | 10 | 1016.5257 | 508.7665 |
| 1343.6417 | 672.3245 | 11 | H   | 9  | 903.4416  | 452.2245 |
| 1442.7101 | 721.8587 | 12 | V   | 8  | 766.3827  | 383.6950 |
| 1529.7422 | 765.3747 | 13 | S   | 7  | 667.3143  | 334.1608 |
| 1586.7636 | 793.8855 | 14 | G   | 6  | 580.2823  | 290.6448 |
| 1687.8113 | 844.4093 | 15 | T   | 5  | 523.2608  | 262.1340 |
| 1804.8425 | 902.9249 | 16 | N   | 4  | 422.2131  | 211.6102 |
| 1861.8640 | 931.4356 | 17 | G   | 3  | 305.1819  | 153.0946 |
| 1962.9116 | 981.9595 | 18 | T   | 2  | 248.1605  | 124.5839 |
|           |          | 19 | K   | 1  | 147.1128  | 74.0600  |

[\[Click\]](#) to move table

Static Modifications:  
C: 57.02146

Variable Modifications:  
N: 2.988261
