# Supplementary material for: Site-Specific O-Glycosylation Analysis of SARS-CoV-2 Spike Protein Produced in Insect and Human Cells
Source: MDPI journal article supplement (doi:10.3390/v13040551), 2021-03-25
Supplement: s1 [file s1]

Fragment Ion View

Project name: 20200330COV19  
Sample name: 20200416\_COV19-double\_1  
Created date: 2020-04-18 15:22:56.0  
Search name:  
Activation type: CID

Peptide sequence: F.HAIHVSGTN(2.988261)GTK.R  
Scan number: 8144  
Calculated M+H: 1224.6217  
Measured M+H: 1224.6255  
Charge state: 3  
File name: 20200416\_COV19-double\_1  
search type: light

Ions:  
a ☐1+ ☐2+ ☐3+  
b ☒1+ ☒2+ ☐3+  
c ☐1+ ☐2+ ☐3+  
x ☐1+ ☐2+ ☐3+  
y ☒1+ ☒2+ ☐3+  
z ☐1+ ☐2+ ☐3+  
[\[Deselect All\]](#)

Neutral Loss:  
☐ H<sub>2</sub>O (o)  
☐ NH<sub>3</sub> (\*)  
☐ H<sub>3</sub>PO<sub>4</sub> (^)  
☐ Precursor (#)  
☐ Precursor with reduced charges

Mass Type:  
☒ Mono ☐ Avg  
Mass Tol:   
☐ Dalton ☒ PPM  

Update

Peak Assignment:  
☒ Most Intense  
☐ Nearest Match  
☐ Peak Detect  
☐ Precursor Removal

Peak Labels:  
☒ Ion ☐ m/z  
☐ None

Width:   
Height:

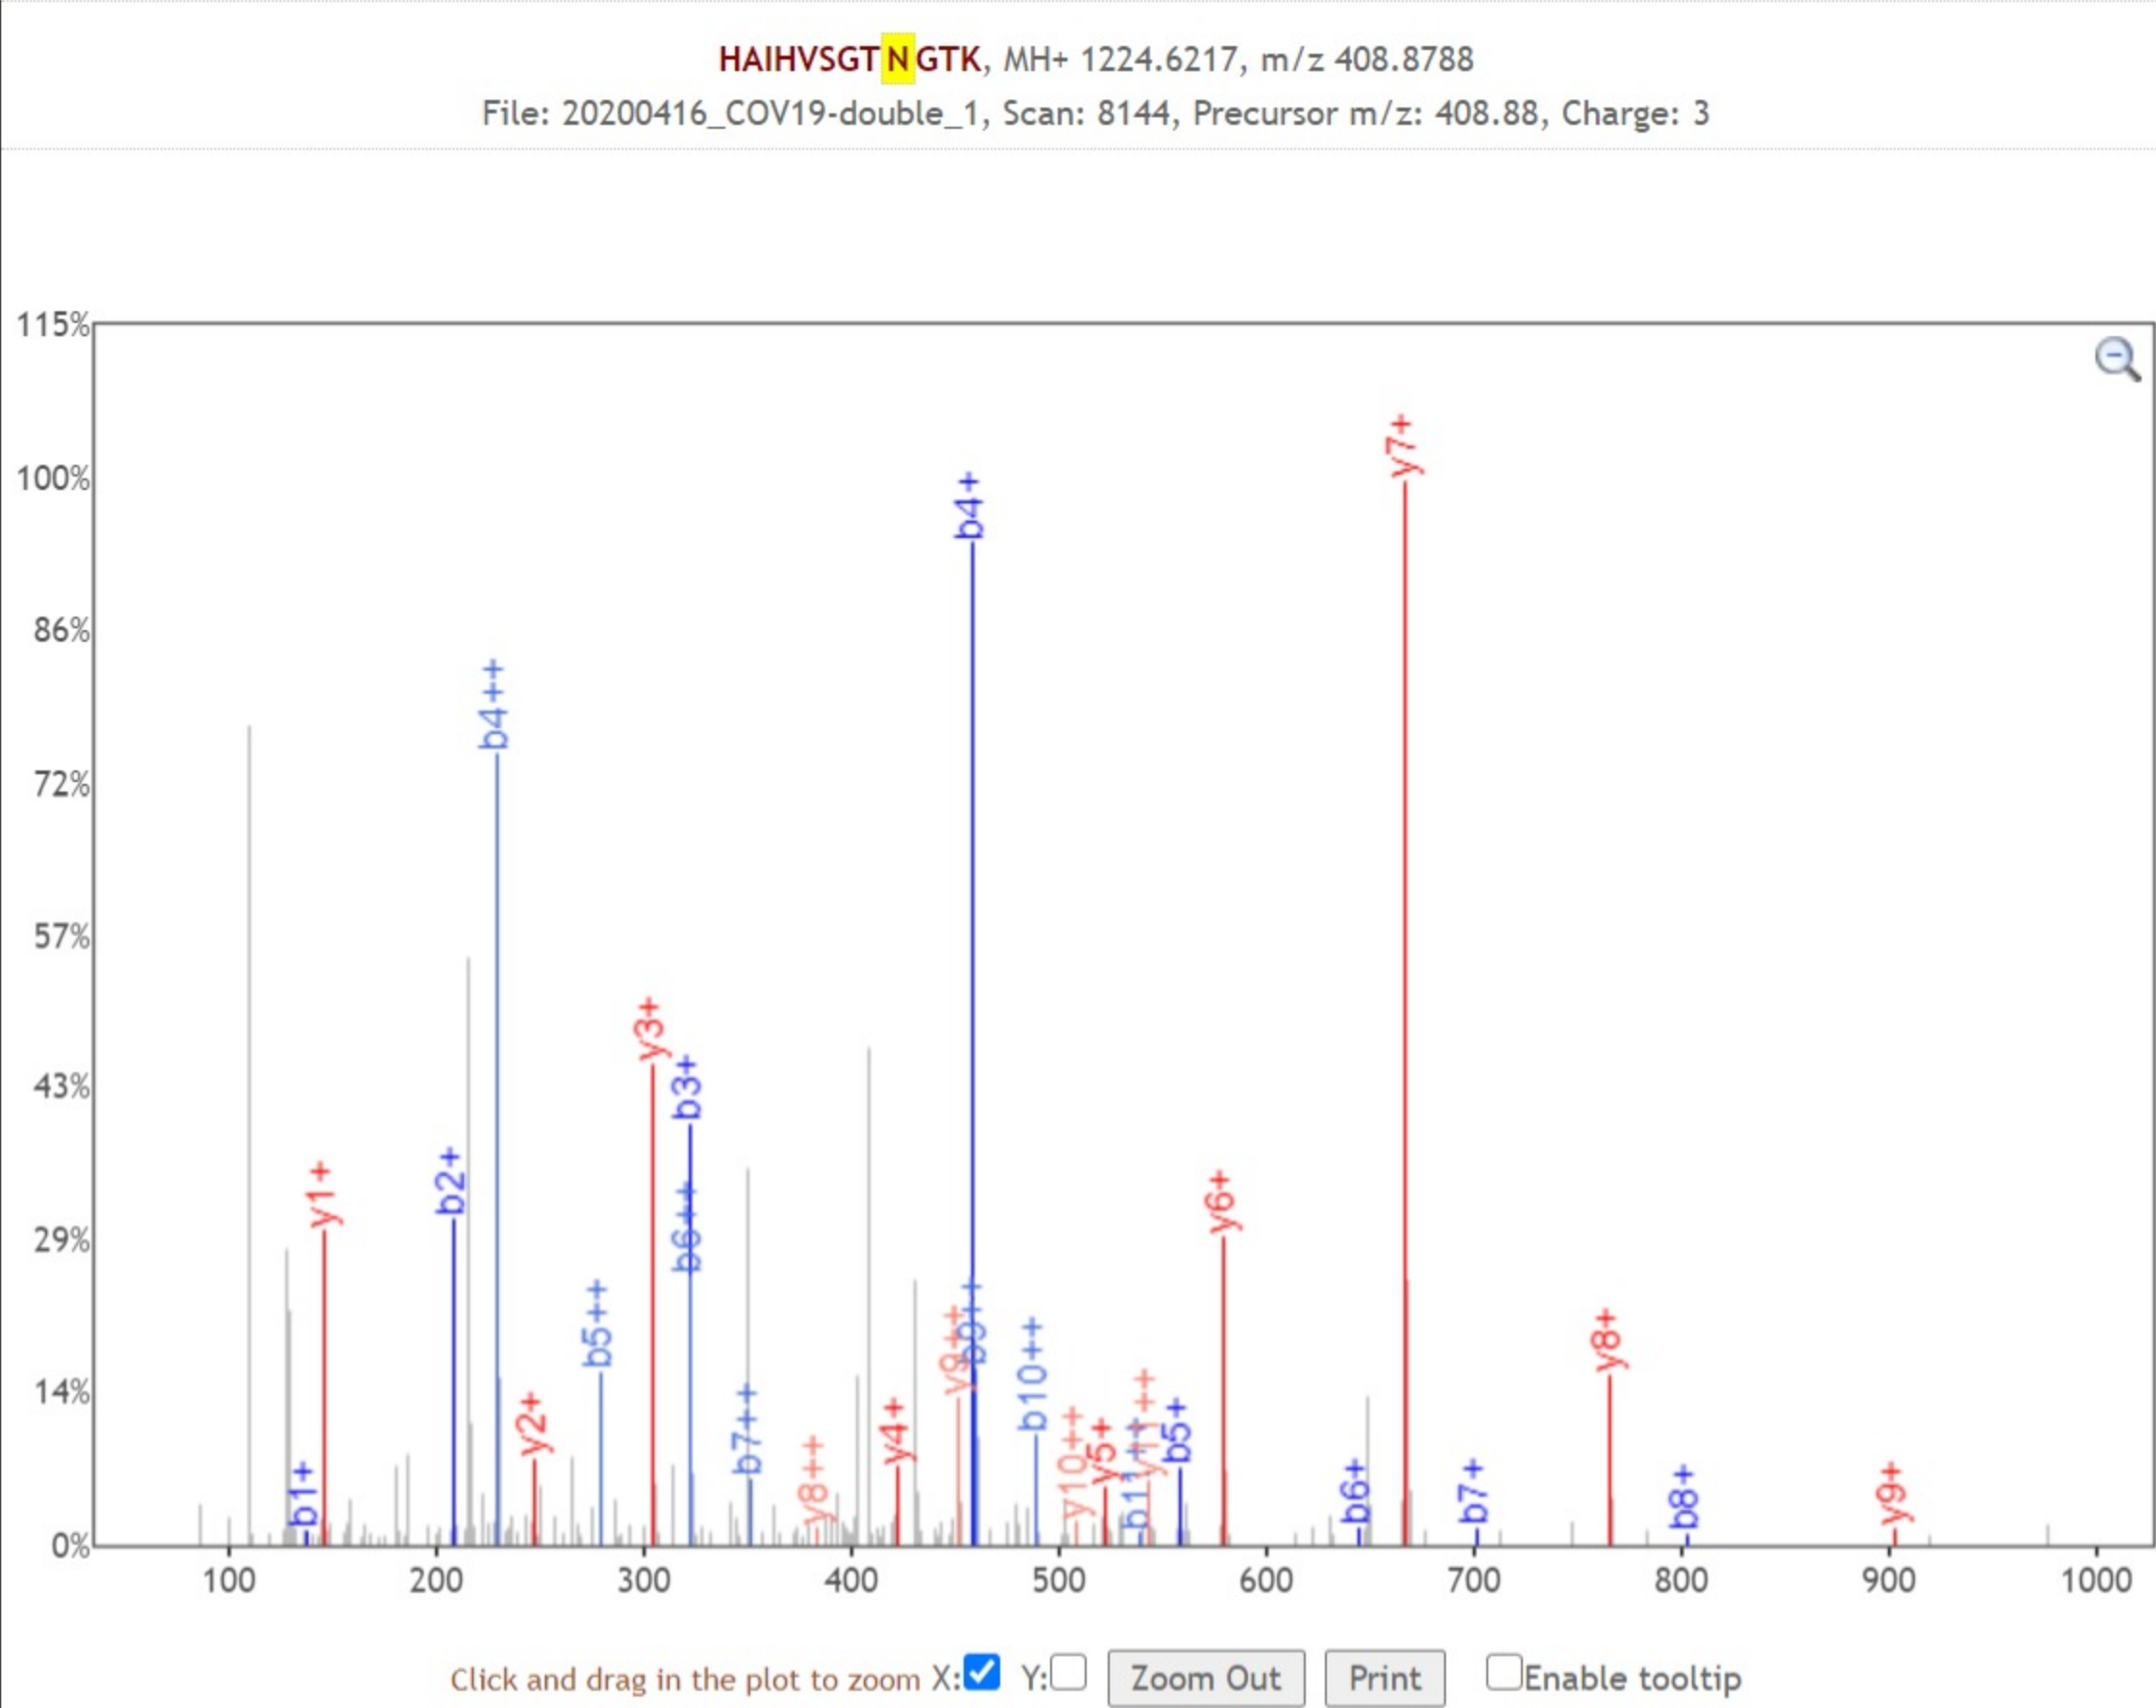

| b+        | b2+      | #  | Seq | #  | y+        | y2+      |
|-----------|----------|----|-----|----|-----------|----------|
| 138.0662  | 69.5367  | 1  | H   | 12 |           |          |
| 209.1033  | 105.0553 | 2  | A   | 11 | 1087.5628 | 544.2850 |
| 322.1874  | 161.5973 | 3  | I   | 10 | 1016.5257 | 508.7665 |
| 459.2463  | 230.1268 | 4  | H   | 9  | 903.4416  | 452.2245 |
| 558.3147  | 279.6610 | 5  | V   | 8  | 766.3827  | 383.6950 |
| 645.3467  | 323.1770 | 6  | S   | 7  | 667.3143  | 334.1608 |
| 702.3682  | 351.6877 | 7  | G   | 6  | 580.2823  | 290.6448 |
| 803.4159  | 402.2116 | 8  | T   | 5  | 523.2608  | 262.1340 |
| 920.4471  | 460.7272 | 9  | N   | 4  | 422.2131  | 211.6102 |
| 977.4685  | 489.2379 | 10 | G   | 3  | 305.1819  | 153.0946 |
| 1078.5162 | 539.7617 | 11 | T   | 2  | 248.1605  | 124.5839 |
|           |          | 12 | K   | 1  | 147.1128  | 74.0600  |

[\[Click\]](#) to move table  
Static Modifications:  
C: 57.02146  
Variable Modifications:  
N: 2.988261
