# Supplementary material for: Site-Specific O-Glycosylation Analysis of SARS-CoV-2 Spike Protein Produced in Insect and Human Cells
Source: MDPI journal article supplement (doi:10.3390/v13040551), 2021-03-25
Supplement: s1 [file s1]

# Fragment Ion View

Project name: 20200330COV19  
Sample name: 20200416\_COV19-double\_1  
Created date: 2020-04-18 15:22:56.0  
Search name:  
Activation type: CID

Peptide sequence: R.EGVFVSN(2.988261)GTHW.F  
Scan number: 47225  
Calculated M+H: 1235.5577  
Measured M+H: 1235.5635  
Charge state: 2  
File name: 20200416\_COV19-double\_1  
search type: light

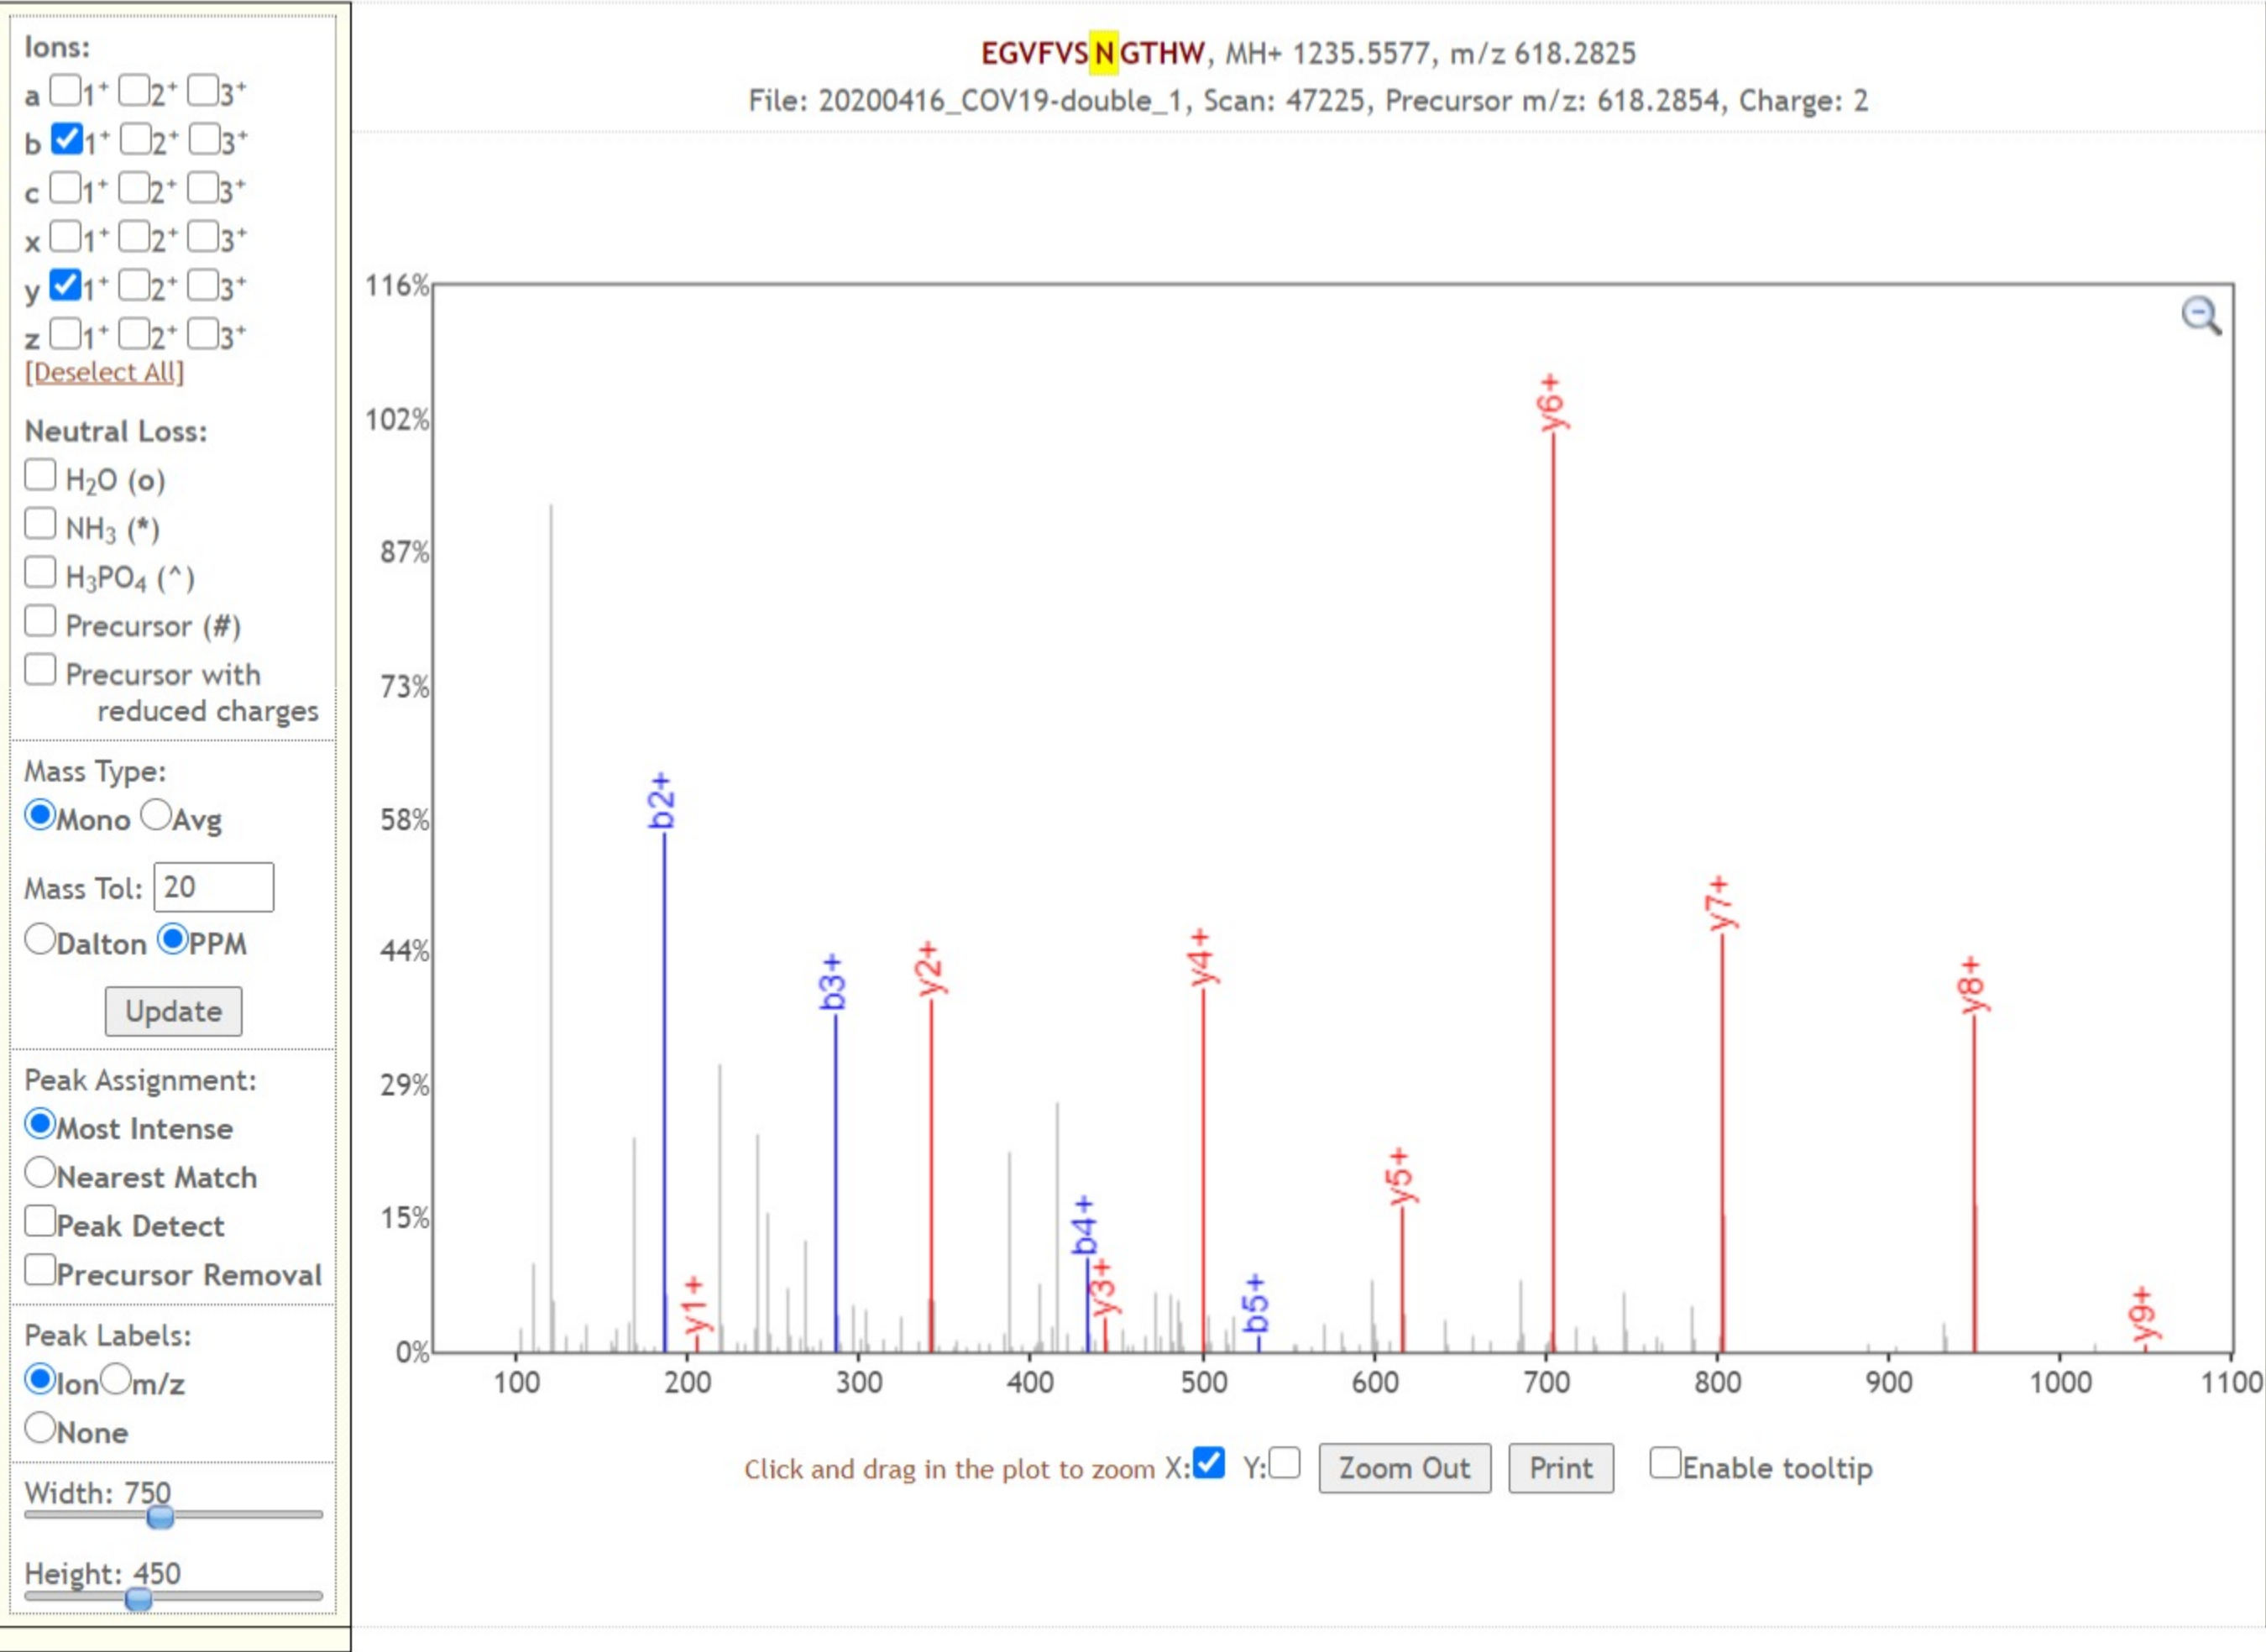

| b+        | #  | Seq | #  | y+        |
|-----------|----|-----|----|-----------|
| 130.0499  | 1  | E   | 11 |           |
| 187.0713  | 2  | G   | 10 | 1106.5151 |
| 286.1397  | 3  | V   | 9  | 1049.4937 |
| 433.2082  | 4  | F   | 8  | 950.4253  |
| 532.2766  | 5  | V   | 7  | 803.3568  |
| 619.3086  | 6  | S   | 6  | 704.2884  |
| 736.3398  | 7  | N   | 5  | 617.2564  |
| 793.3613  | 8  | G   | 4  | 500.2252  |
| 894.4089  | 9  | T   | 3  | 443.2037  |
| 1031.4678 | 10 | H   | 2  | 342.1561  |
|           | 11 | W   | 1  | 205.0972  |

[Click] to move table

Static Modifications:  
C: 57.02146

Variable Modifications:  
N: 2.988261
