# Supplementary material for: Site-Specific O-Glycosylation Analysis of SARS-CoV-2 Spike Protein Produced in Insect and Human Cells
Source: MDPI journal article supplement (doi:10.3390/v13040551), 2021-03-25
Supplement: s1 [file s1]

## Fragment Ion View

Project name: 20200330COV19

Sample name: 20200416\_COV19-double\_1

Created date: 2020-04-18 15:22:56.0

Search name:

Activation type: CID

Peptide sequence: R.EGVFVSN(2.988261)GTHWF.V

Scan number: 53387

Calculated M+H: 1382.6261

Measured M+H: 1382.631

Charge state: 2

File name: 20200416\_COV19-double\_1

search type: light

**Ions:**

a ☐ 1<sup>+</sup> ☐ 2<sup>+</sup> ☐ 3<sup>+</sup>

b ☒ 1<sup>+</sup> ☐ 2<sup>+</sup> ☐ 3<sup>+</sup>

c ☐ 1<sup>+</sup> ☐ 2<sup>+</sup> ☐ 3<sup>+</sup>

x ☐ 1<sup>+</sup> ☐ 2<sup>+</sup> ☐ 3<sup>+</sup>

y ☒ 1<sup>+</sup> ☐ 2<sup>+</sup> ☐ 3<sup>+</sup>

z ☐ 1<sup>+</sup> ☐ 2<sup>+</sup> ☐ 3<sup>+</sup>

[\[Deselect All\]](#)

**Neutral Loss:**

☐ H<sub>2</sub>O (o)

☐ NH<sub>3</sub> (\*)

☐ H<sub>3</sub>PO<sub>4</sub> (^)

☐ Precursor (#)

☐ Precursor with reduced charges

**Mass Type:**

☒ Mono ☐ Avg

Mass Tol:

☐ Dalton ☒ PPM

**Peak Assignment:**

☒ Most Intense

☐ Nearest Match

☐ Peak Detect

☐ Precursor Removal

**Peak Labels:**

☒ Ion ☐ m/z

☐ None

Width:

Height:

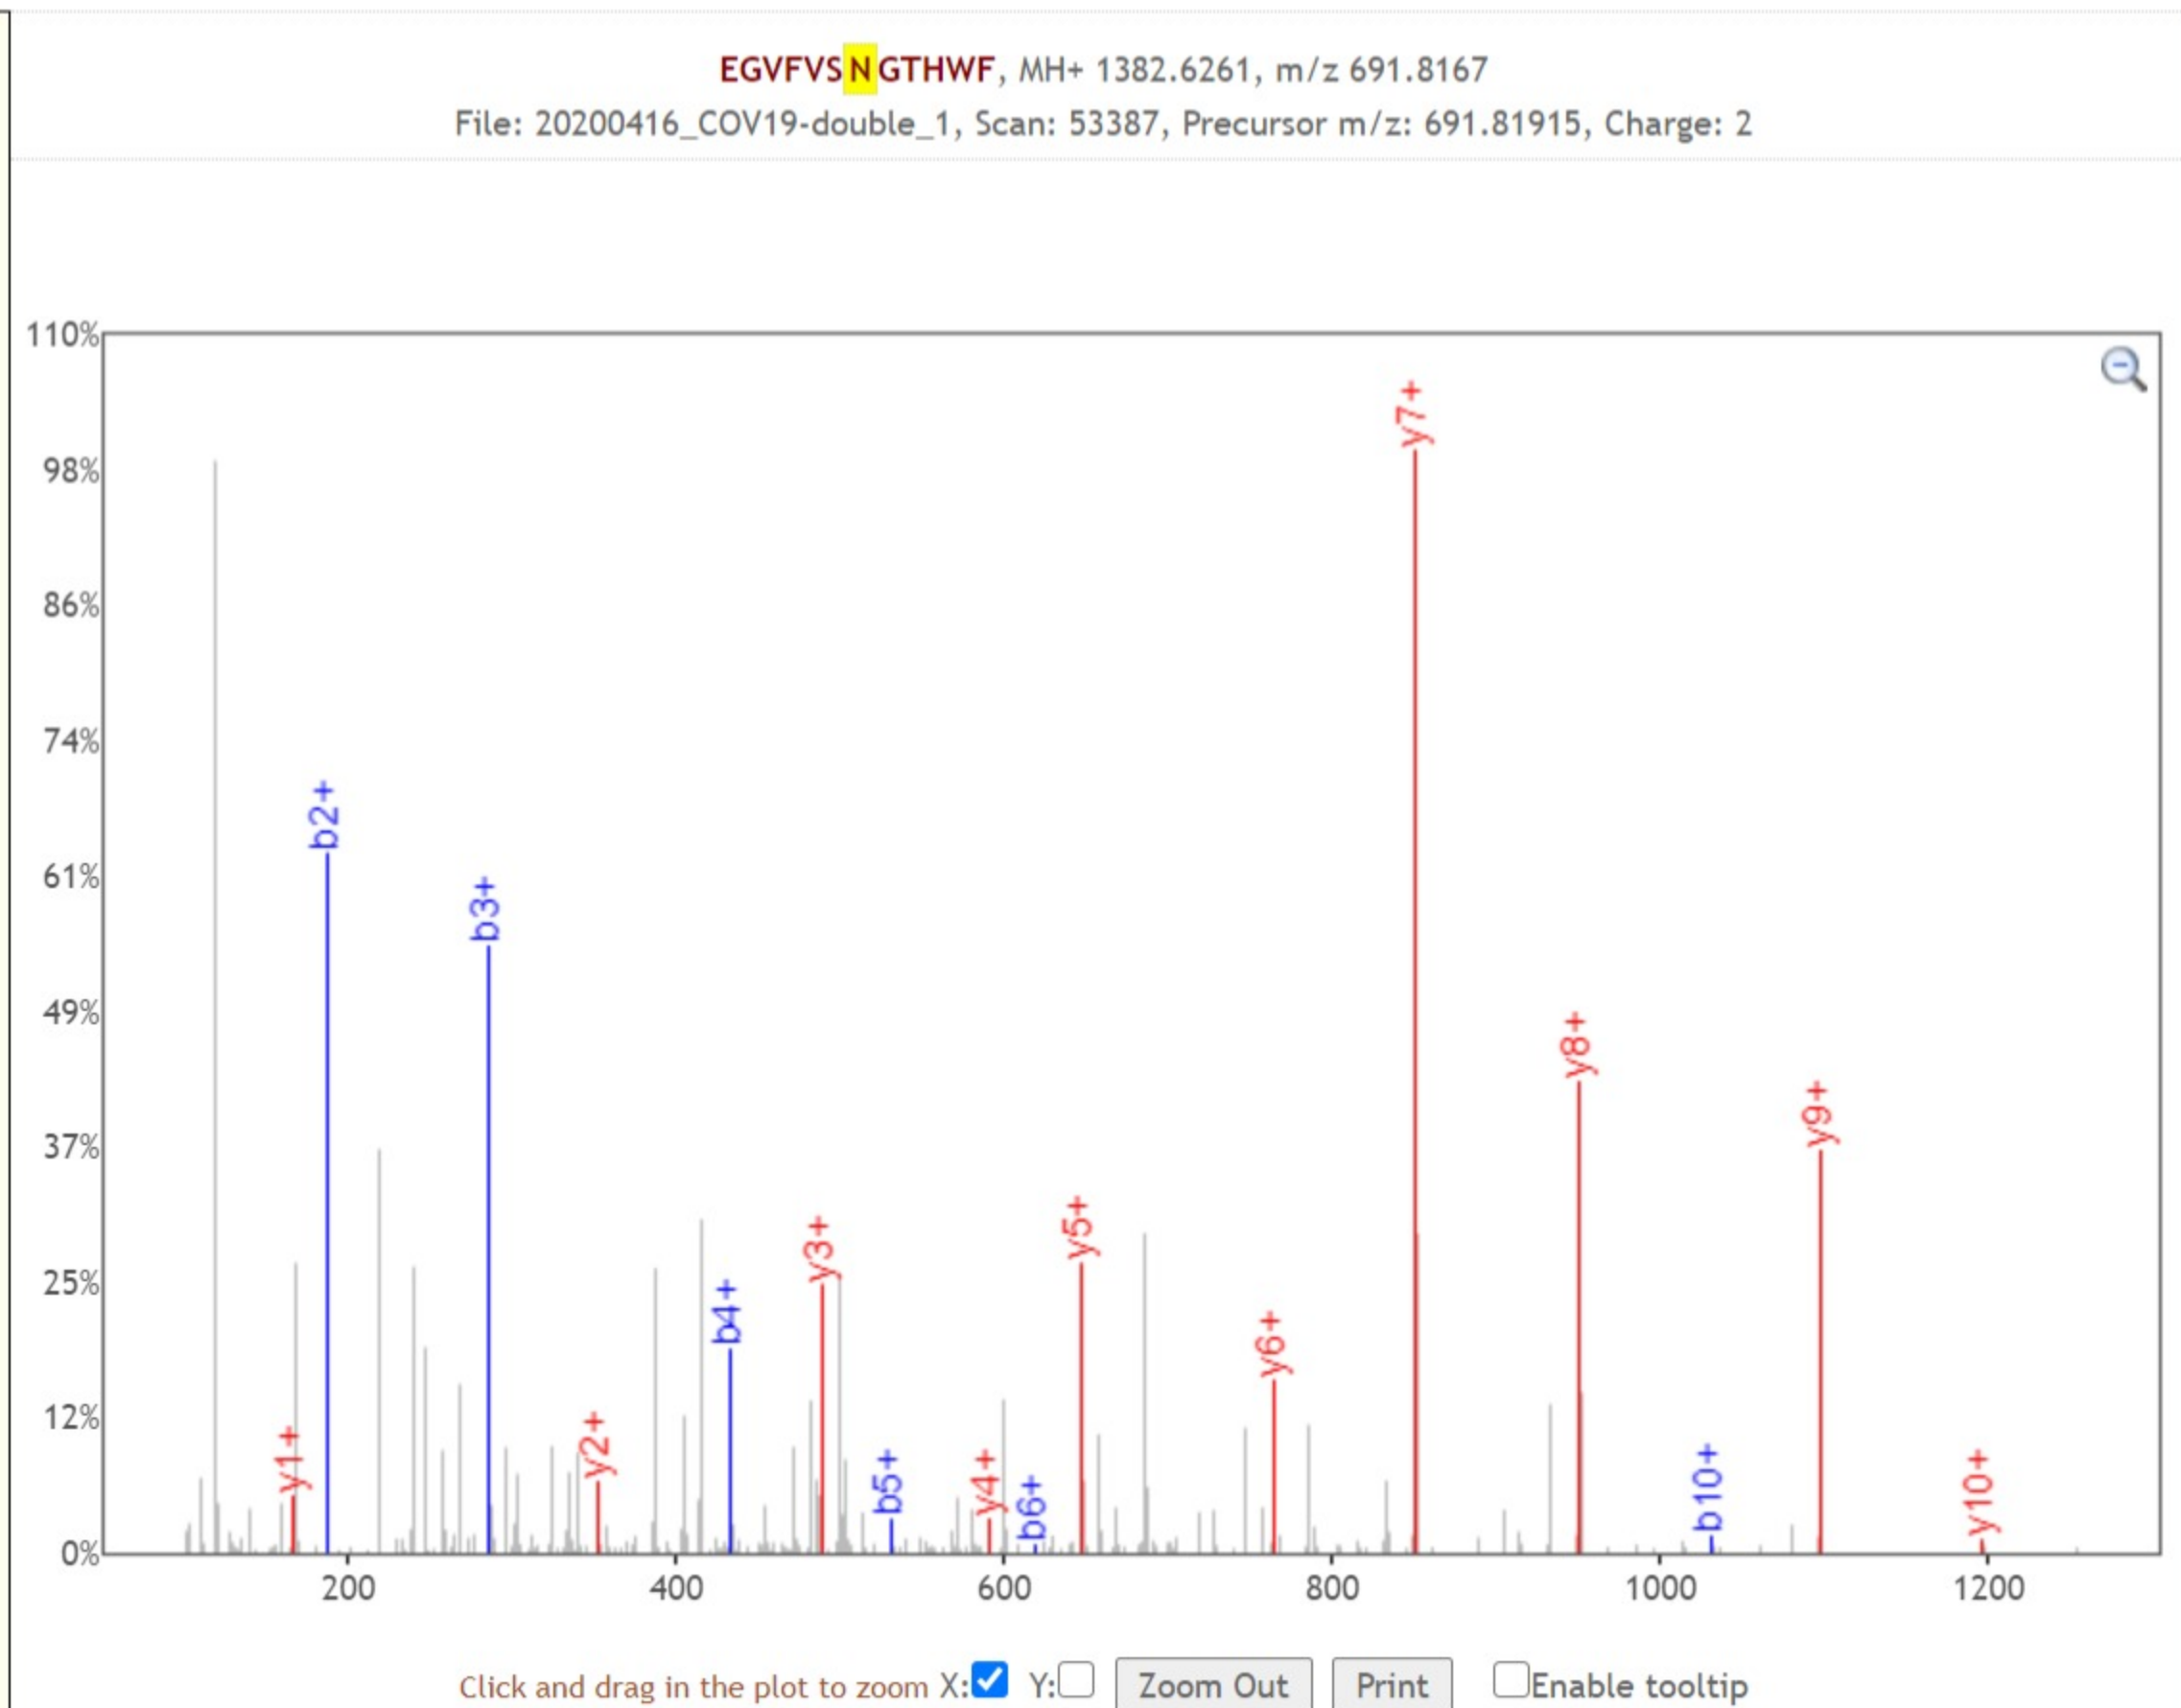

| b <sup>+</sup>   | #  | Seq | #  | y <sup>+</sup>   |
|------------------|----|-----|----|------------------|
| 130.0499         | 1  | E   | 12 |                  |
| <b>187.0713</b>  | 2  | G   | 11 | 1253.5835        |
| <b>286.1397</b>  | 3  | V   | 10 | <b>1196.5621</b> |
| <b>433.2082</b>  | 4  | F   | 9  | <b>1097.4937</b> |
| <b>532.2766</b>  | 5  | V   | 8  | <b>950.4253</b>  |
| <b>619.3086</b>  | 6  | S   | 7  | <b>851.3568</b>  |
| 736.3398         | 7  | N   | 6  | <b>764.3248</b>  |
| 793.3613         | 8  | G   | 5  | <b>647.2936</b>  |
| 894.4089         | 9  | T   | 4  | <b>590.2722</b>  |
| <b>1031.4678</b> | 10 | H   | 3  | <b>489.2245</b>  |
| 1217.5472        | 11 | W   | 2  | <b>352.1656</b>  |
|                  | 12 | F   | 1  | <b>166.0863</b>  |

[Click] to move table

### Static Modifications:

C: 57.02146

**Variable Modifications:**

N: 2.988261
