# Supplementary material for: Site-Specific O-Glycosylation Analysis of SARS-CoV-2 Spike Protein Produced in Insect and Human Cells
Source: MDPI journal article supplement (doi:10.3390/v13040551), 2021-03-25
Supplement: s1 [file s1]

Fragment Ion View

Project name: 20200330COV19  
Sample name: 20200416\_COV19-double\_1  
Created date: 2020-04-18 15:22:56.0  
Search name:  
Activation type: CID

Peptide sequence: F.HAIHVSGTNGT(203.079373)K.R  
Scan number: 7068  
Calculated M+H: 1424.7129  
Measured M+H: 1424.7184  
Charge state: 2  
File name: 20200416\_COV19-double\_1  
search type: light

Ions:  
a ☐1+ ☐2+ ☐3+  
b ☒1+ ☐2+ ☐3+  
c ☐1+ ☐2+ ☐3+  
x ☐1+ ☐2+ ☐3+  
y ☒1+ ☐2+ ☐3+  
z ☐1+ ☐2+ ☐3+  
[\[Deselect All\]](#)

Neutral Loss:  
☐ H<sub>2</sub>O (o)  
☐ NH<sub>3</sub> (\*)  
☐ H<sub>3</sub>PO<sub>4</sub> (^)  
☐ Precursor (#)  
☐ Precursor with reduced charges

Mass Type:  
☒ Mono ☐ Avg  
Mass Tol:   
☐ Dalton ☒ PPM  

Update

Peak Assignment:  
☒ Most Intense  
☐ Nearest Match  
☐ Peak Detect  
☐ Precursor Removal

Peak Labels:  
☒ Ion ☐ m/z  
☐ None  
Width:   
Height:

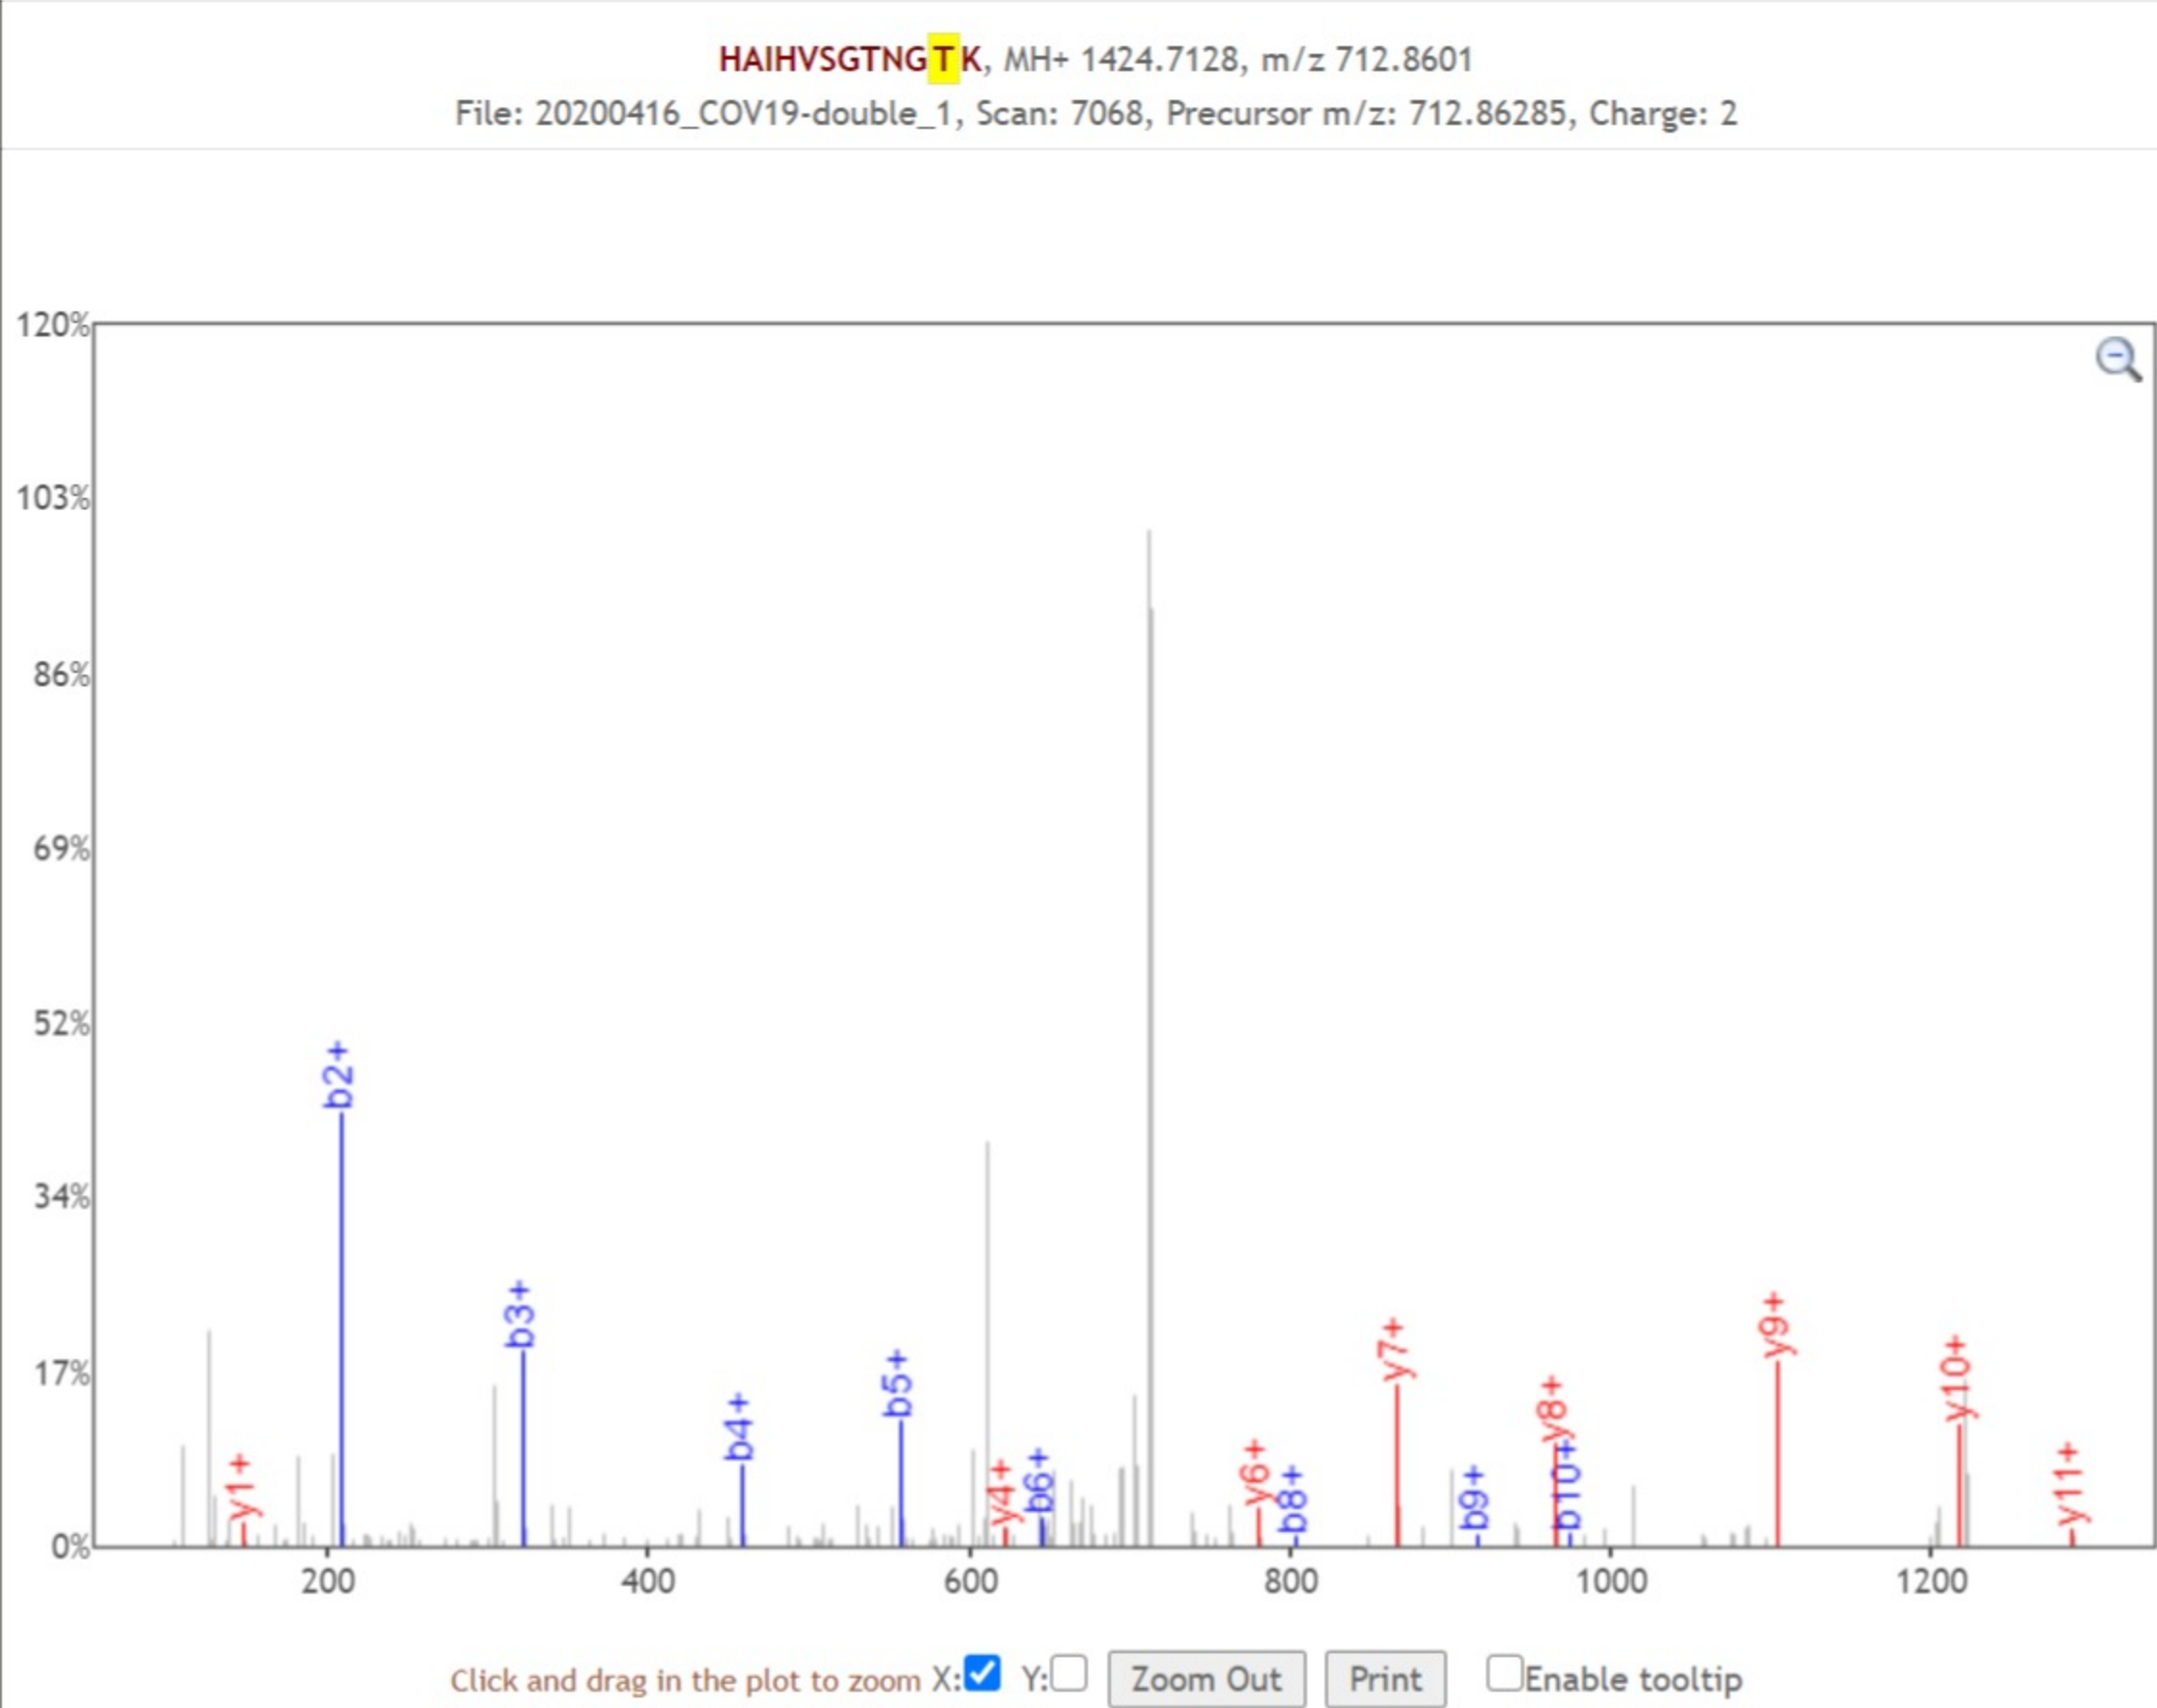

| b+        | #  | Seq | #  | y+        |
|-----------|----|-----|----|-----------|
| 138.0662  | 1  | H   | 12 |           |
| 209.1033  | 2  | A   | 11 | 1287.6539 |
| 322.1874  | 3  | I   | 10 | 1216.6168 |
| 459.2463  | 4  | H   | 9  | 1103.5327 |
| 558.3147  | 5  | V   | 8  | 966.4738  |
| 645.3467  | 6  | S   | 7  | 867.4054  |
| 702.3682  | 7  | G   | 6  | 780.3734  |
| 803.4159  | 8  | T   | 5  | 723.3519  |
| 917.4588  | 9  | N   | 4  | 622.3042  |
| 974.4803  | 10 | G   | 3  | 508.2613  |
| 1278.6073 | 11 | T   | 2  | 451.2399  |
|           | 12 | K   | 1  | 147.1128  |

[\[Click\]](#) to move table

Static Modifications:  
C: 57.02146

Variable Modifications:  
T: 203.079373
