# Supplementary material for: Site-Specific O-Glycosylation Analysis of SARS-CoV-2 Spike Protein Produced in Insect and Human Cells
Source: MDPI journal article supplement (doi:10.3390/v13040551), 2021-03-25
Supplement: s1 [file s1]

Fragment Ion View

Project name: 20200330COV19  
Sample name: 20200416\_COV19-double\_2  
Created date: 2020-04-18 15:22:56.0  
Search name:  
Activation type: CID

Peptide sequence: R.EGVFVS(203.079373)NGTHW.F  
Scan number: 44068  
Calculated M+H: 1435.6488  
Measured M+H: 1435.6523  
Charge state: 2  
File name: 20200416\_COV19-double\_2  
search type: light

**Ions:**

a ☐1+ ☐2+ ☐3+

b ☒1+ ☐2+ ☐3+

c ☐1+ ☐2+ ☐3+

x ☐1+ ☐2+ ☐3+

y ☒1+ ☐2+ ☐3+

z ☐1+ ☐2+ ☐3+

[\[Deselect All\]](#)

**Neutral Loss:**

☐ H<sub>2</sub>O (o)

☐ NH<sub>3</sub> (\*)

☐ H<sub>3</sub>PO<sub>4</sub> (^)

☐ Precursor (#)

☐ Precursor with reduced charges

**Mass Type:**

☒ Mono ☐ Avg

Mass Tol:

☐ Dalton ☒ PPM

**Peak Assignment:**

☒ Most Intense

☐ Nearest Match

☐ Peak Detect

☐ Precursor Removal

**Peak Labels:**

☒ Ion ☐ m/z

☐ None

Width:

Height:

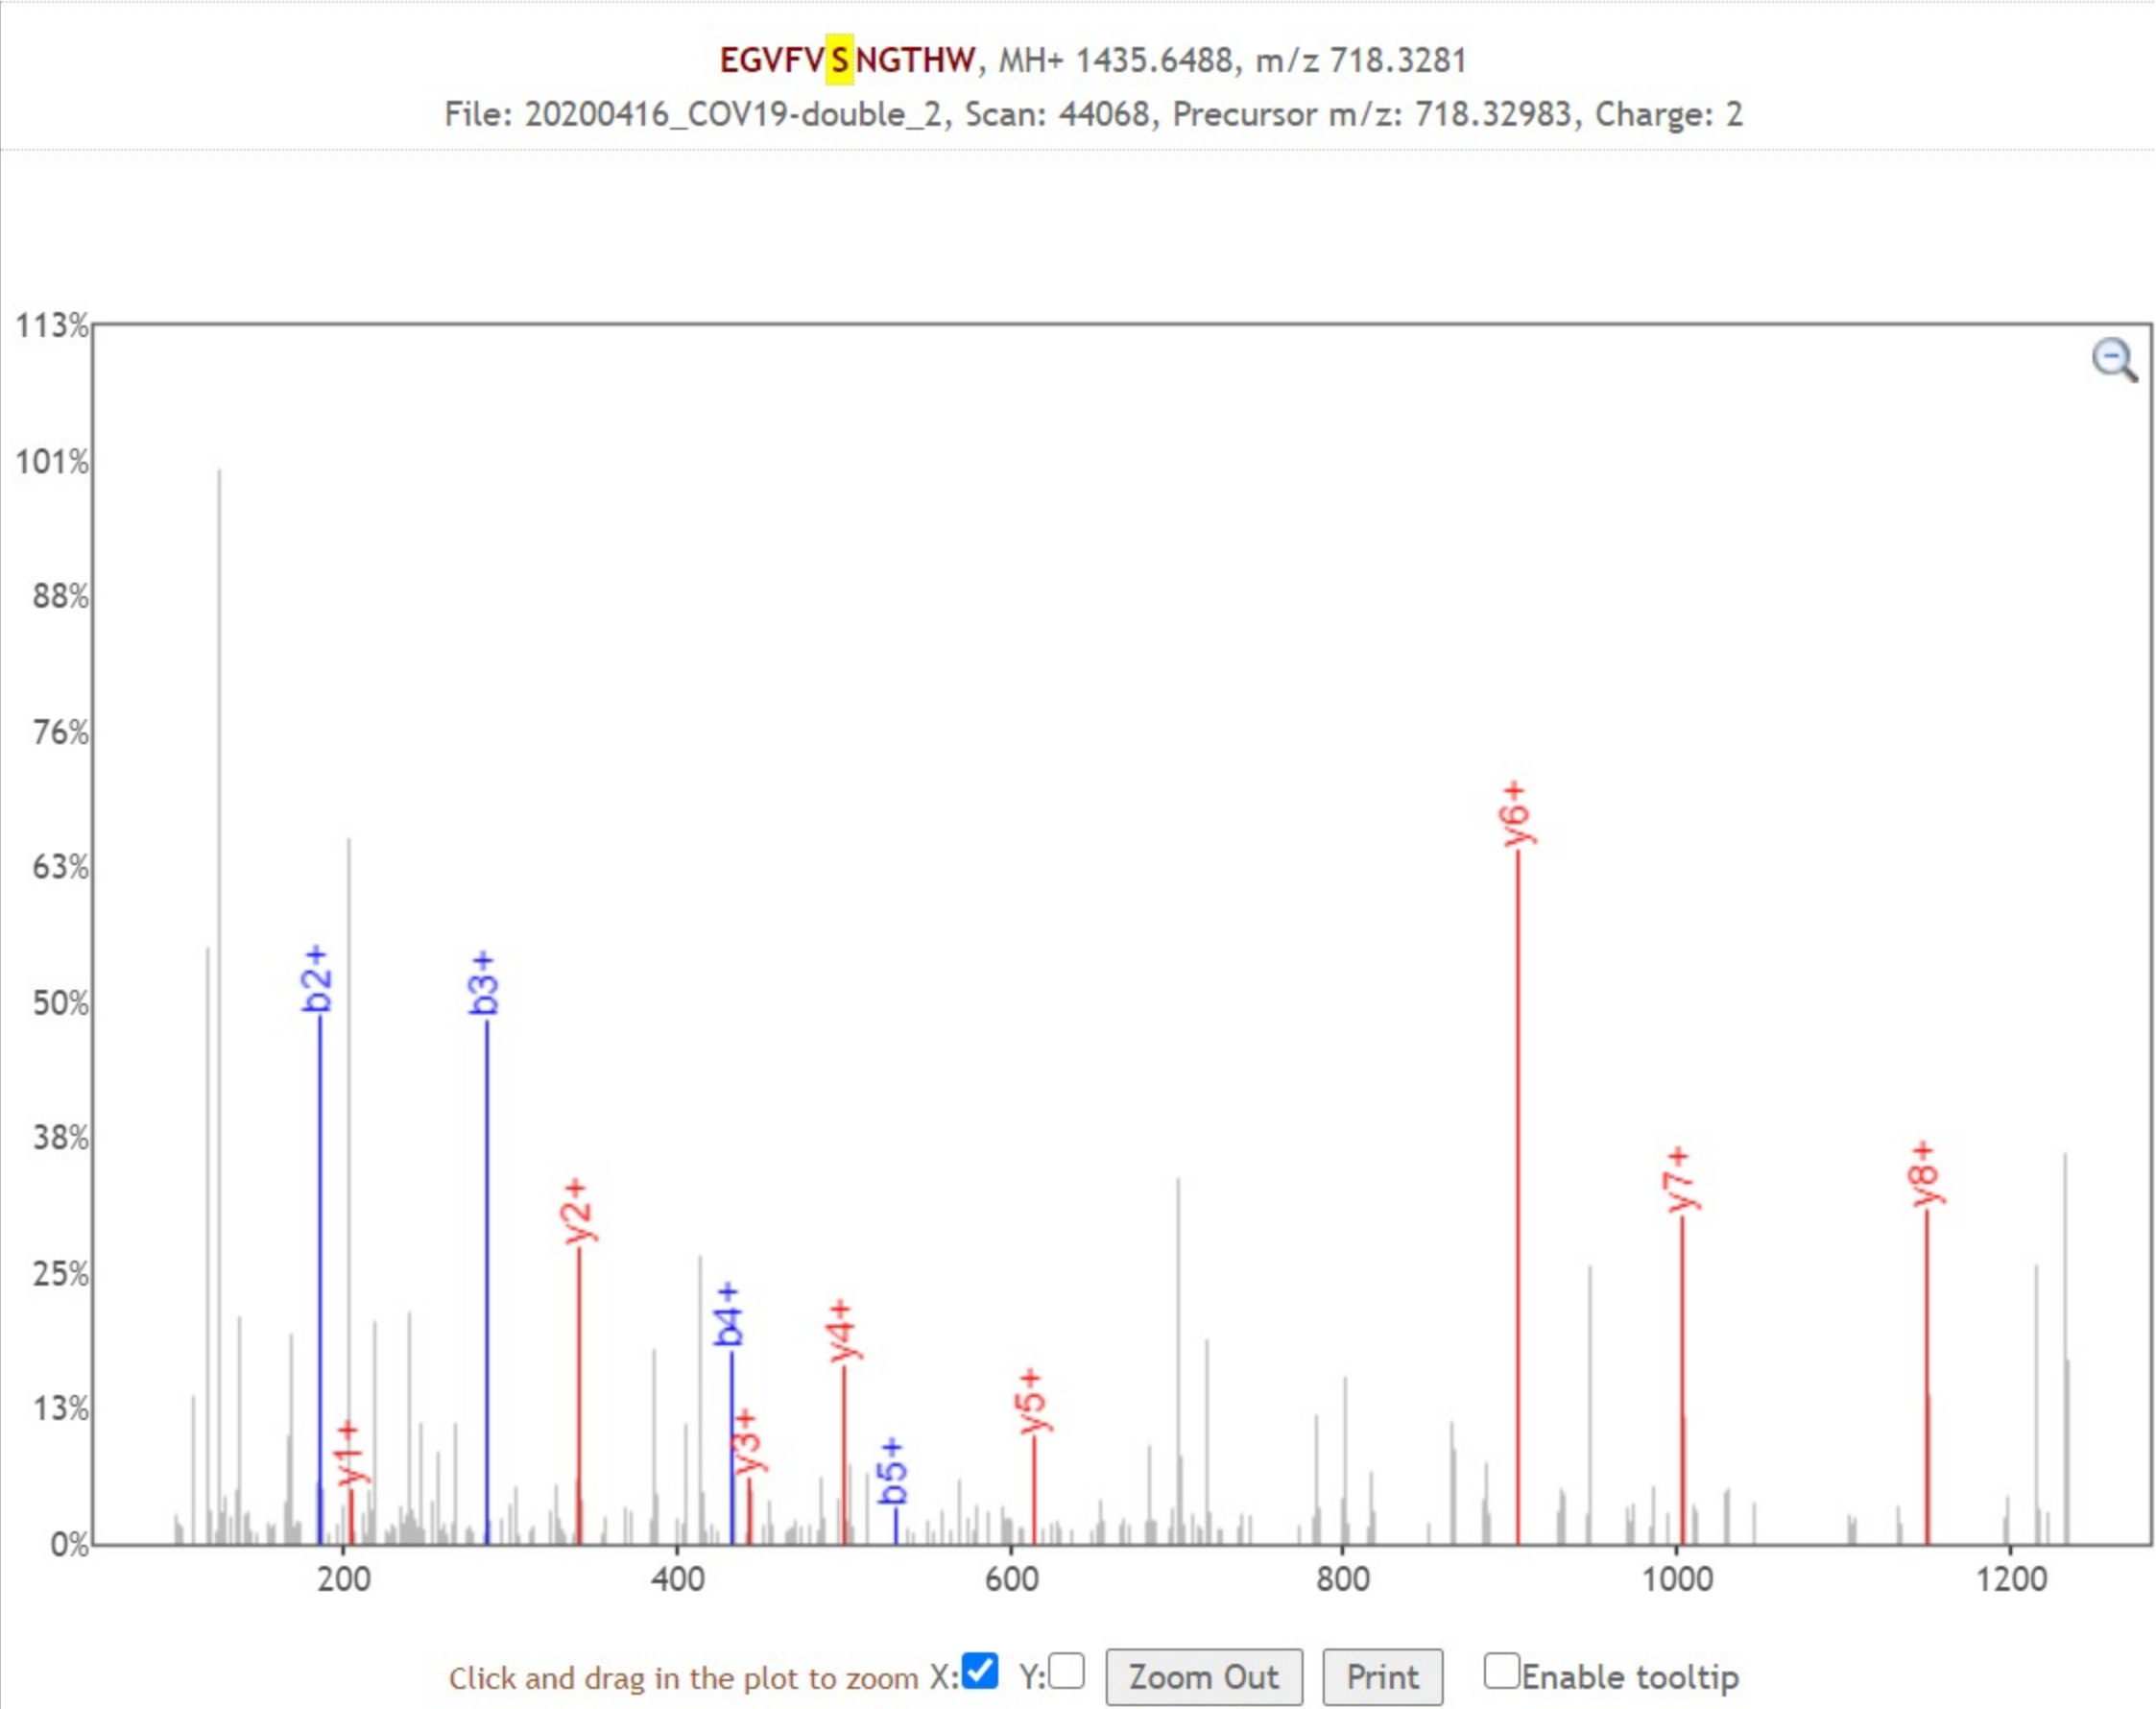

| b+        | #  | Seq | #  | y+        |
|-----------|----|-----|----|-----------|
| 130.0499  | 1  | E   | 11 |           |
| 187.0713  | 2  | G   | 10 | 1306.6062 |
| 286.1397  | 3  | V   | 9  | 1249.5848 |
| 433.2082  | 4  | F   | 8  | 1150.5164 |
| 532.2766  | 5  | V   | 7  | 1003.4480 |
| 822.3880  | 6  | S   | 6  | 904.3795  |
| 936.4309  | 7  | N   | 5  | 614.2681  |
| 993.4524  | 8  | G   | 4  | 500.2252  |
| 1094.5000 | 9  | T   | 3  | 443.2037  |
| 1231.5590 | 10 | H   | 2  | 342.1561  |
|           | 11 | W   | 1  | 205.0972  |

[\[Click\]](#) to move table

Static Modifications:  
C: 57.02146

Variable Modifications:  
S: 203.079373
