# Supplementary material for: Site-Specific O-Glycosylation Analysis of SARS-CoV-2 Spike Protein Produced in Insect and Human Cells
Source: MDPI journal article supplement (doi:10.3390/v13040551), 2021-03-25
Supplement: s1 [file s1]

# Fragment Ion View

Project name: 20200330COV19  
Sample name: 20200416\_COV19-double\_2  
Created date: 2020-04-18 15:22:56.0  
Search name:  
Activation type: CID

Peptide sequence: K.DFGGFN(2.988261)FSQILPDPSK.P  
Scan number: 55962  
Calculated M+H: 1771.8424  
Measured M+H: 1771.85  
Charge state: 2  
File name: 20200416\_COV19-double\_2  
search type: light

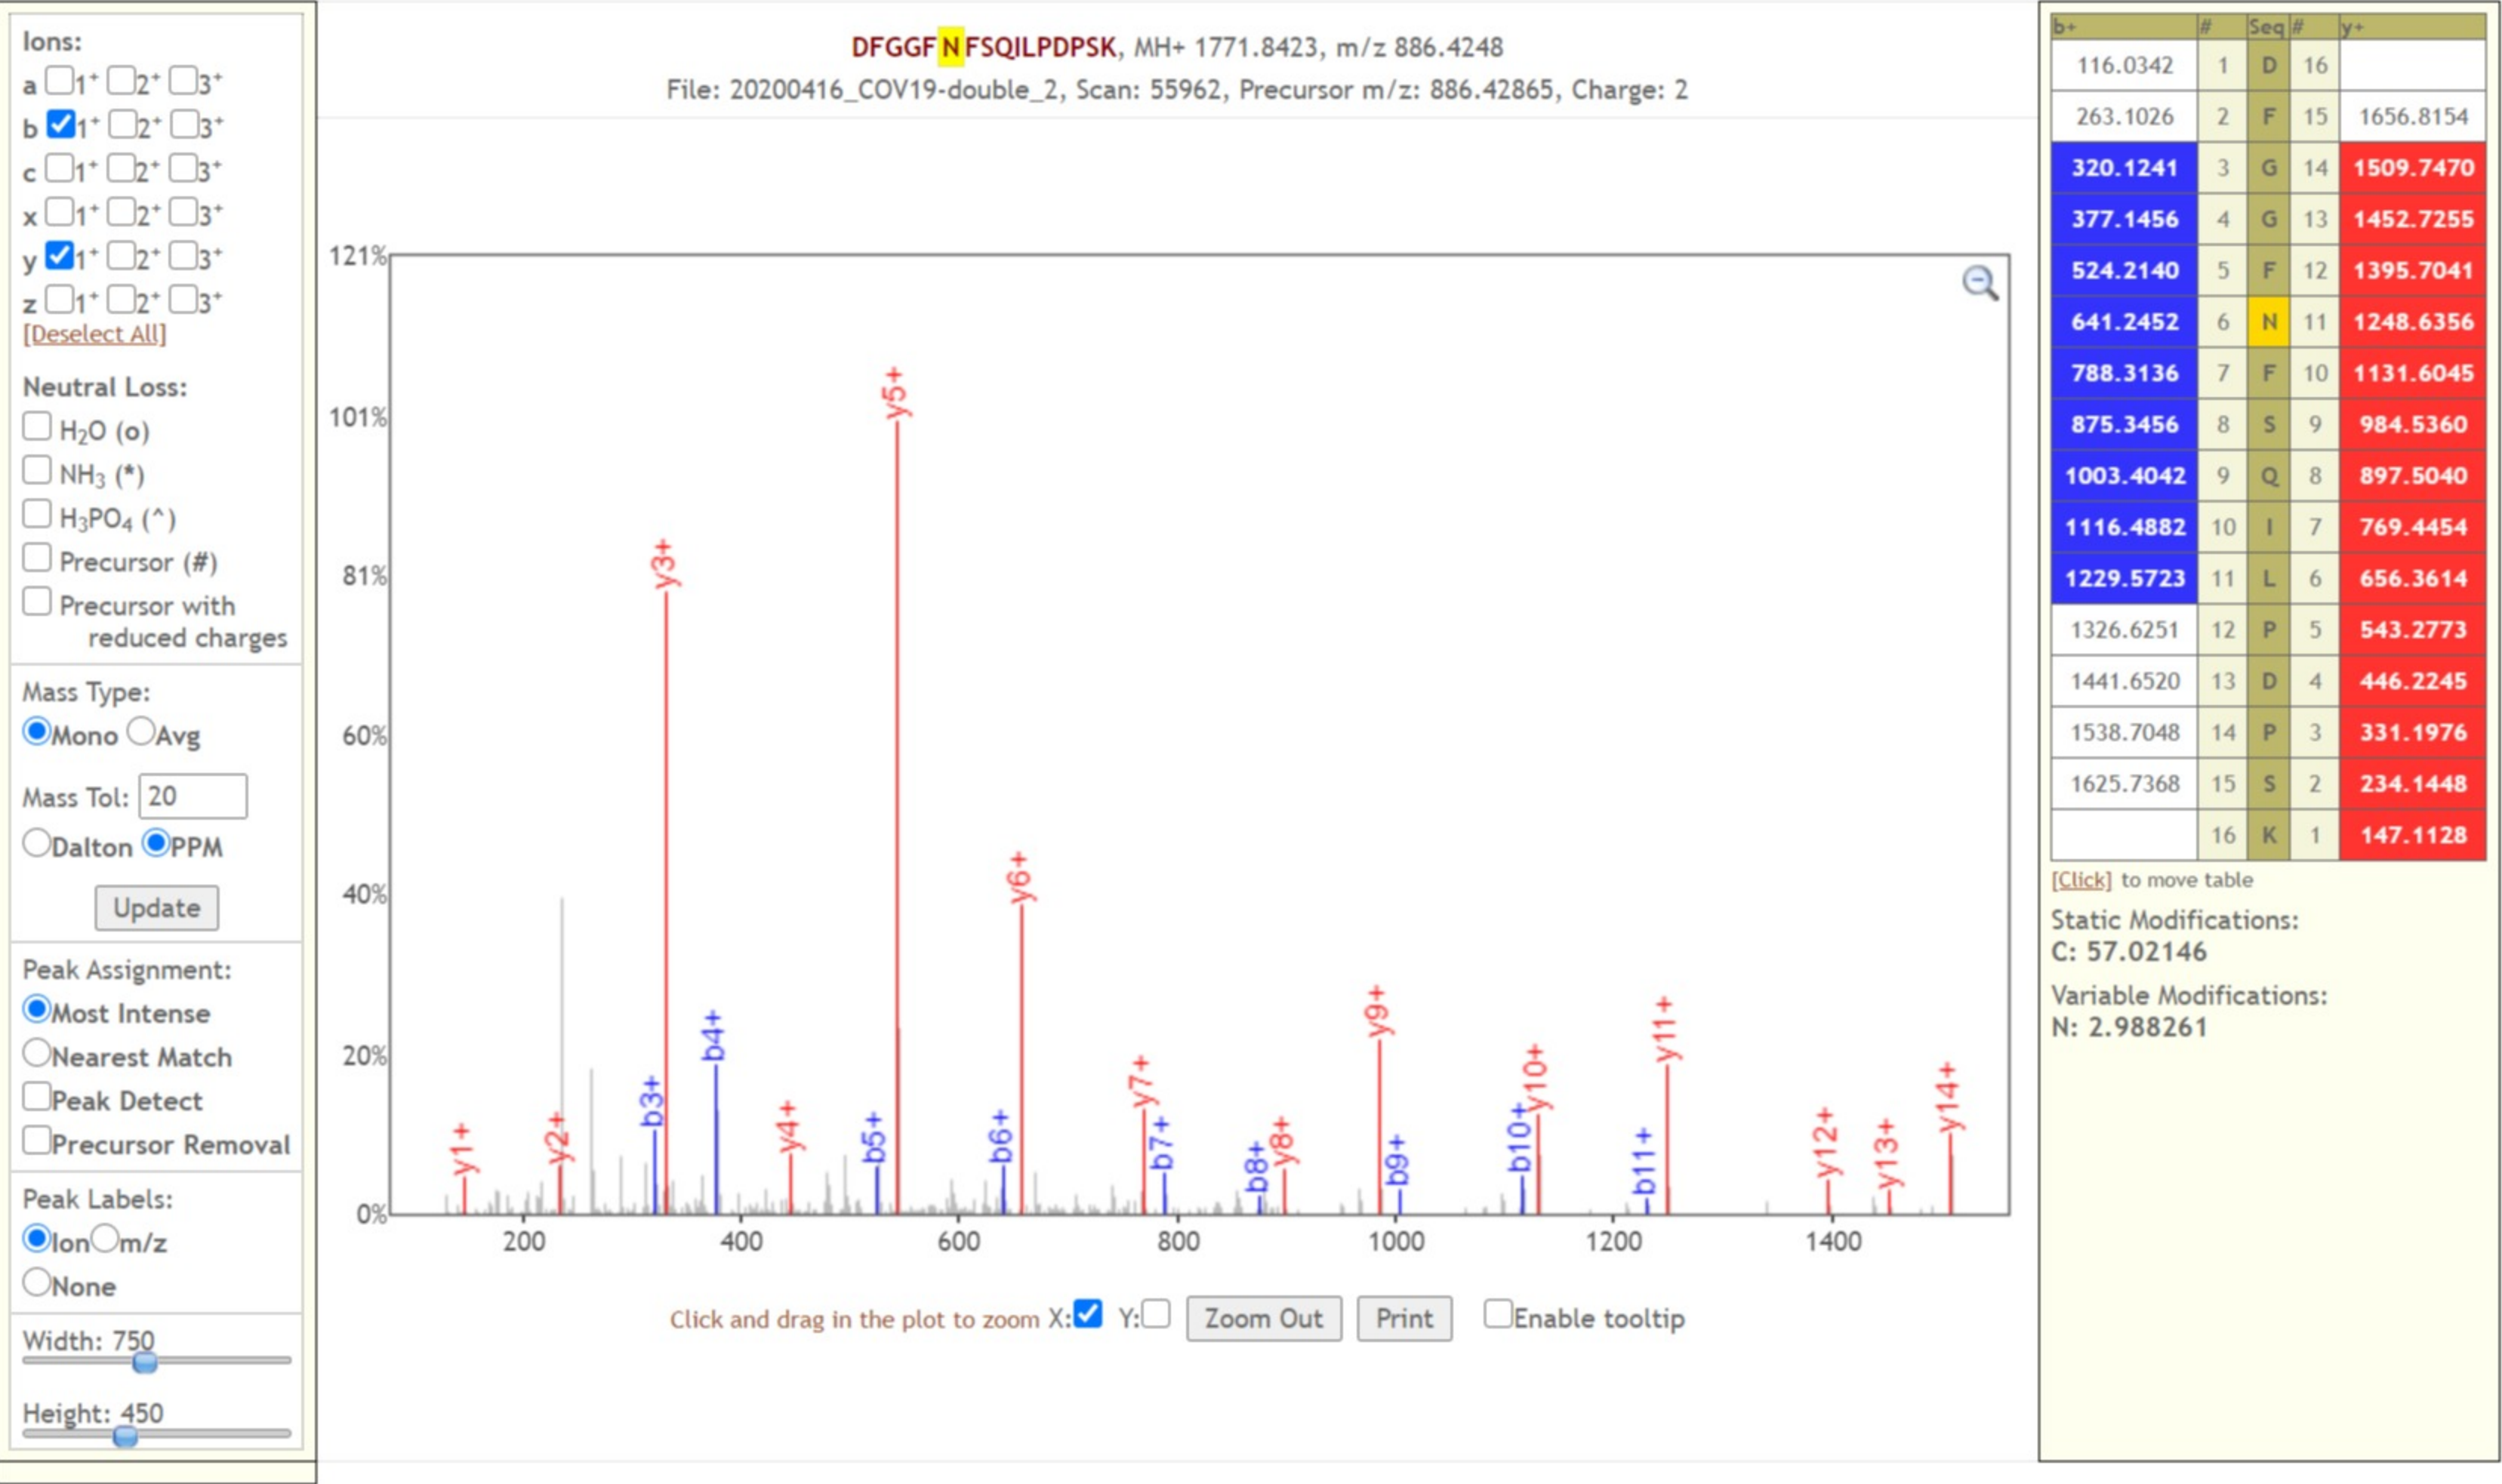

z

☐

1<sup>+</sup>

☐

2<sup>+</sup>

☐

3<sup>+</sup>

[Deselect All]

Neutral Loss:

☐ H<sub>2</sub>O (o)

☐ NH<sub>3</sub> (\*)

☐ H<sub>3</sub>PO<sub>4</sub> (^)

☐ Precursor (#)

☐ Precursor with reduced charges

Mass Type:

☒ Mono

☐ Avg

Mass Tol:

20

☐ Dalton

☒ PPM

Update

Peak Assignment:

☒ Most Intense

☐ Nearest Match

☐ Peak Detect

☐ Precursor Removal

Peak Labels:

☒ Ion

☐ m/z

☐ None

Width: 750

Height: 450

DFGGF**N**FSQILPDPSK, MH+ 1771.8423, m/z 886.4248

File: 20200416\_COV19-double\_2, Scan: 55962, Precursor m/z: 886.42865, Charge: 2

Click and drag in the plot to zoom X: ☒ Y: ☐

Zoom Out

Print

☐ Enable tooltip

| b+        | #  | Seq | #  | y+        |
|-----------|----|-----|----|-----------|
| 116.0342  | 1  | D   | 16 |           |
| 263.1026  | 2  | F   | 15 | 1656.8154 |
| 320.1241  | 3  | G   | 14 | 1509.7470 |
| 377.1456  | 4  | G   | 13 | 1452.7255 |
| 524.2140  | 5  | F   | 12 | 1395.7041 |
| 641.2452  | 6  | N   | 11 | 1248.6356 |
| 788.3136  | 7  | F   | 10 | 1131.6045 |
| 875.3456  | 8  | S   | 9  | 984.5360  |
| 1003.4042 | 9  | Q   | 8  | 897.5040  |
| 1116.4882 | 10 | I   | 7  | 769.4454  |
| 1229.5723 | 11 | L   | 6  | 656.3614  |
| 1326.6251 | 12 | P   | 5  | 543.2773  |
| 1441.6520 | 13 | D   | 4  | 446.2245  |
| 1538.7048 | 14 | P   | 3  | 331.1976  |
| 1625.7368 | 15 | S   | 2  | 234.1448  |
|           | 16 | K   | 1  | 147.1128  |

[Click] to move table

Static Modifications:  
C: 57.02146

Variable Modifications:  
N: 2.988261
