# Supplementary material for: Site-Specific O-Glycosylation Analysis of SARS-CoV-2 Spike Protein Produced in Insect and Human Cells
Source: MDPI journal article supplement (doi:10.3390/v13040551), 2021-03-25
Supplement: s1 [file s1]

Sample name: 20200416\_COV19-double\_2

Search name:

Scan number: 49970

Measured M+H: 2109.0225

File name: 20200416\_COV19-double 2

$$a \square_1^+ \square_2^+ \square_3^+$$

☐ 1 ☒ 2 ☐ 3  
☐ 4 ☐ 5 ☐ 6

$$x \square 1^+ \square 2^+ \square 3^+$$
$$z = \square_1 + \square_2 + \square_3$$

Neutral Loss:

☐  $\text{H}_2\text{O} (\text{g})$ ☐  $\text{H}_3\text{PO}_4$ ☐ Precursor

Mass Type:

☒ Mono ☐ Stereo☐ D ☒ E

Update

☒ Most Intense

☐ Round Trip

☐ Precursor

Peak Labels:

☐ None

Width: 750

Height: 450

\_\_\_\_\_

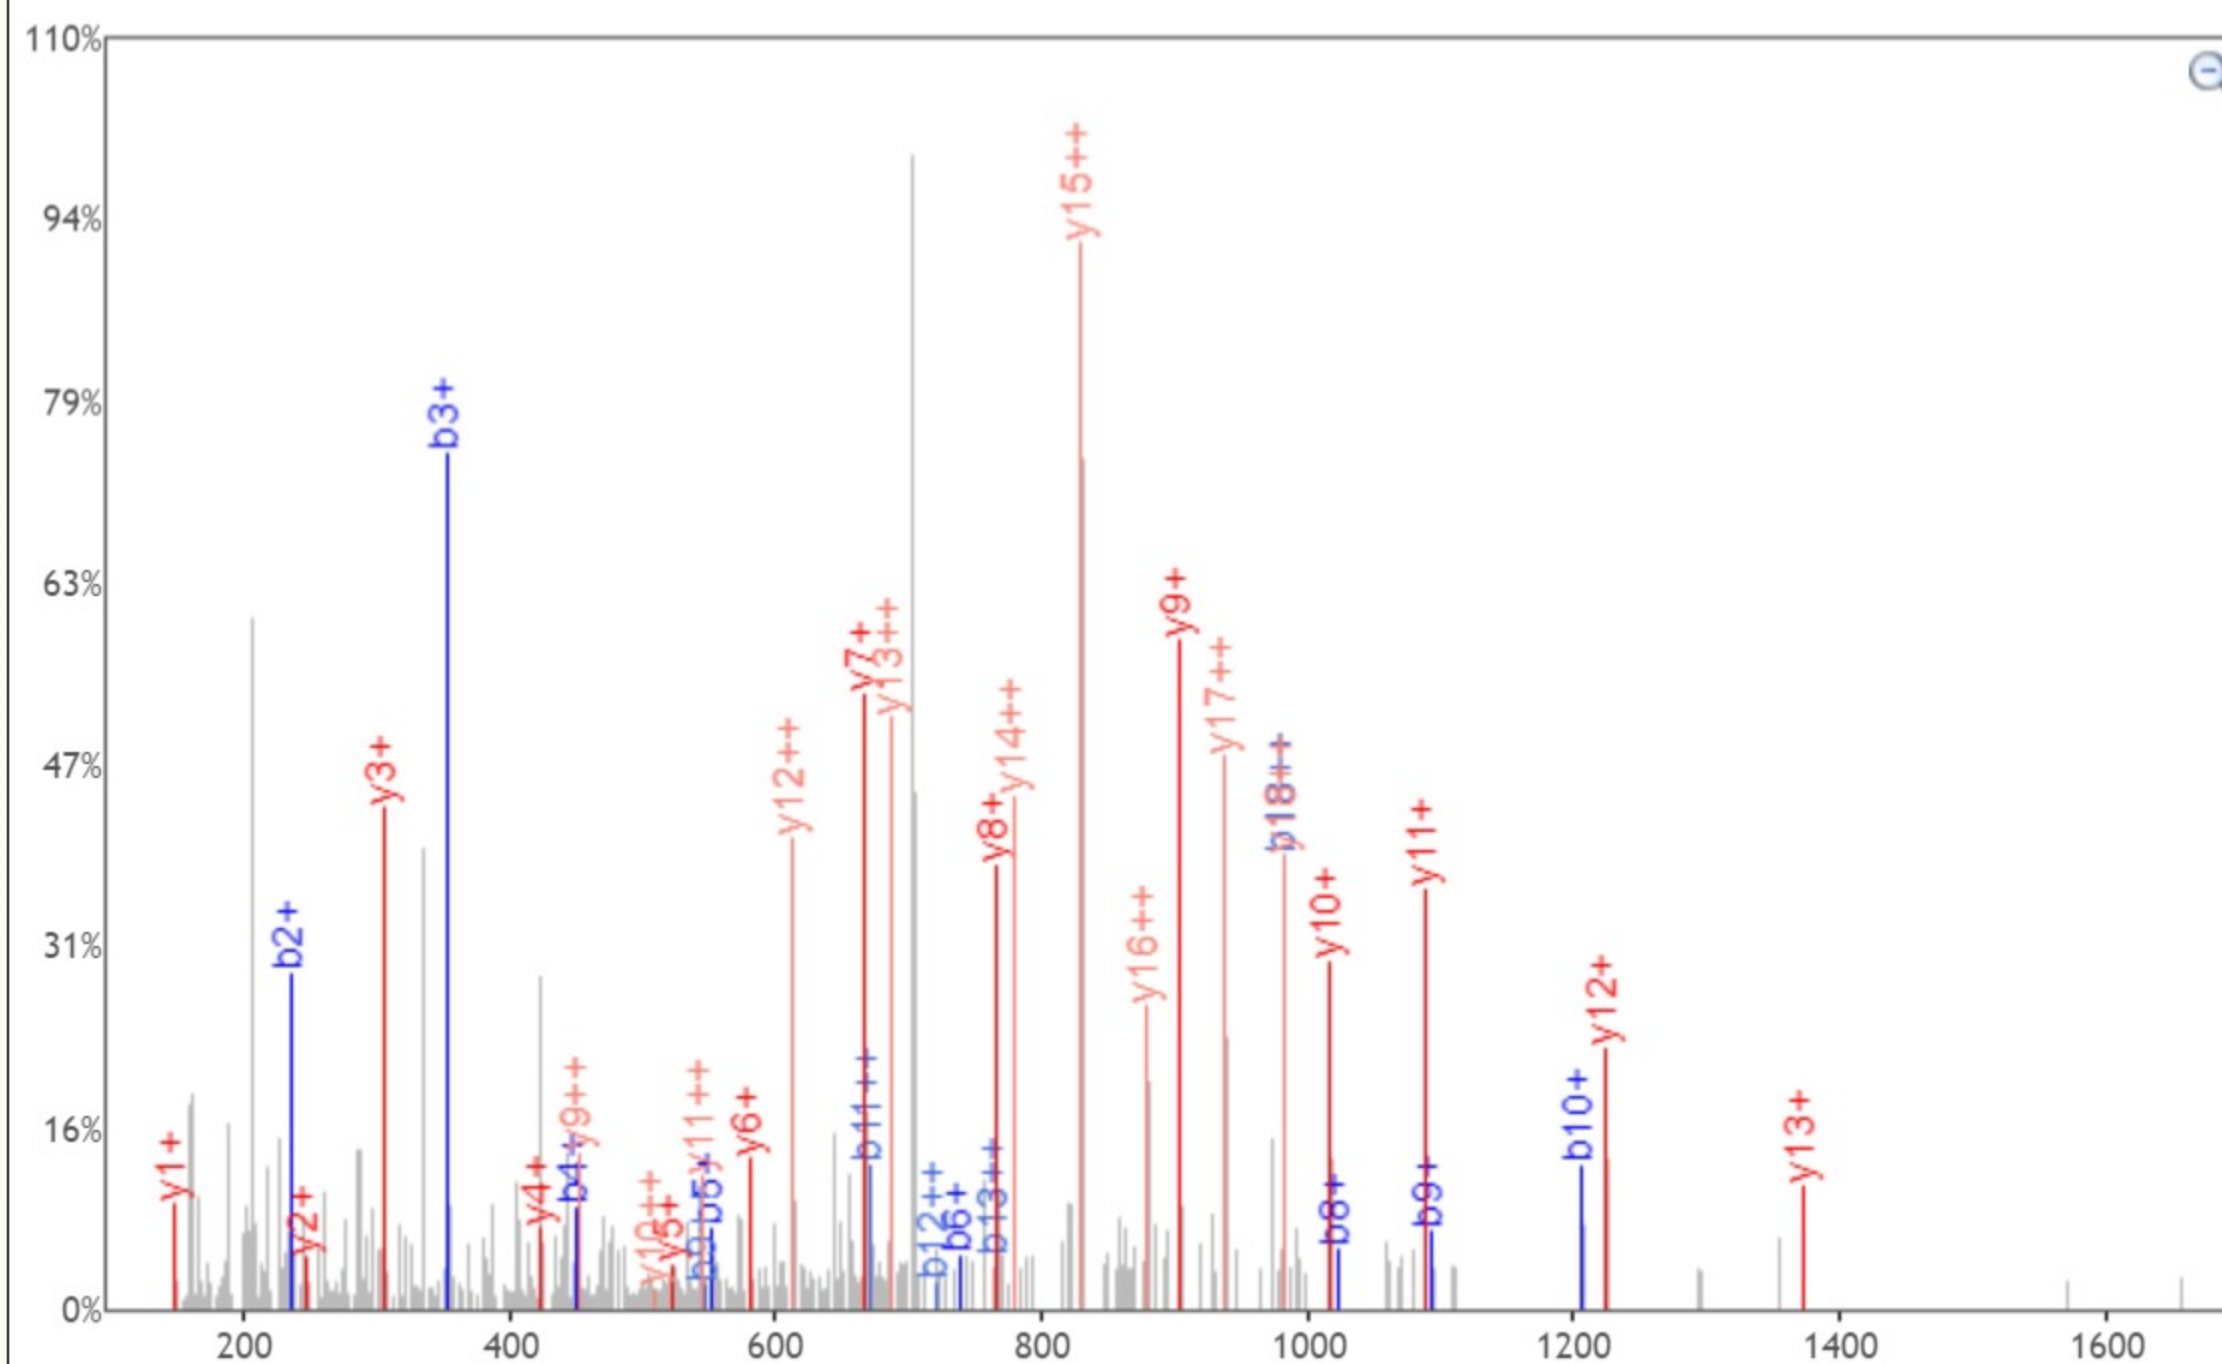

Click and drag in the plot to zoom X: ☒ Y: ☐   ☐ Enable tooltip

| b+               | b2+             | #  | Seq | #  | y+               | y2+             |
|------------------|-----------------|----|-----|----|------------------|-----------------|
| 148.0757         | 74.5415         | 1  | F   | 19 |                  |                 |
| <b>235.1077</b>  | 118.0575        | 2  | S   | 18 | 1961.9488        | <b>981.4780</b> |
| <b>352.1389</b>  | 176.5731        | 3  | N   | 17 | 1874.9167        | <b>937.9620</b> |
| <b>451.2073</b>  | 226.1073        | 4  | V   | 16 | 1757.8855        | <b>879.4464</b> |
| <b>552.2550</b>  | 276.6311        | 5  | T   | 15 | 1658.8171        | <b>829.9122</b> |
| <b>738.3343</b>  | 369.6708        | 6  | W   | 14 | 1557.7694        | <b>779.3884</b> |
| 885.4027         | 443.2050        | 7  | F   | 13 | <b>1371.6901</b> | <b>686.3487</b> |
| <b>1022.4616</b> | 511.7345        | 8  | H   | 12 | <b>1224.6217</b> | <b>612.8145</b> |
| <b>1093.4988</b> | <b>547.2530</b> | 9  | A   | 11 | <b>1087.5628</b> | <b>544.2850</b> |
| <b>1206.5828</b> | 603.7950        | 10 | I   | 10 | <b>1016.5257</b> | <b>508.7665</b> |
| 1343.6417        | <b>672.3245</b> | 11 | H   | 9  | <b>903.4416</b>  | <b>452.2245</b> |
| 1442.7101        | <b>721.8587</b> | 12 | V   | 8  | <b>766.3827</b>  | 383.6950        |
| 1529.7422        | <b>765.3747</b> | 13 | S   | 7  | <b>667.3143</b>  | 334.1608        |
| 1586.7636        | 793.8855        | 14 | G   | 6  | <b>580.2823</b>  | 290.6448        |
| 1687.8113        | 844.4093        | 15 | T   | 5  | <b>523.2608</b>  | 262.1340        |
| 1804.8425        | 902.9249        | 16 | N   | 4  | <b>422.2131</b>  | 211.6102        |
| 1861.8640        | 931.4356        | 17 | G   | 3  | <b>305.1819</b>  | 153.0946        |
| 1962.9116        | <b>981.9595</b> | 18 | T   | 2  | <b>248.1605</b>  | 124.5839        |
|                  |                 | 19 | K   | 1  | <b>147.1128</b>  | 74.0600         |
