# Supplementary material for: Site-Specific O-Glycosylation Analysis of SARS-CoV-2 Spike Protein Produced in Insect and Human Cells
Source: MDPI journal article supplement (doi:10.3390/v13040551), 2021-03-25
Supplement: s1 [file s1]

# Fragment Ion View

Project name: 20200330COV19  
Sample name: 20200416\_COV19-double\_1  
Created date: 2020-04-18 15:22:56.0  
Search name:  
Activation type: CID

Peptide sequence: L.VDLPIGINIT(203.079373).R  
Scan number: 53501  
Calculated M+H: 1257.6936  
Measured M+H: 1257.6973  
Charge state: 2  
File name: 20200416\_COV19-double\_1  
search type: light

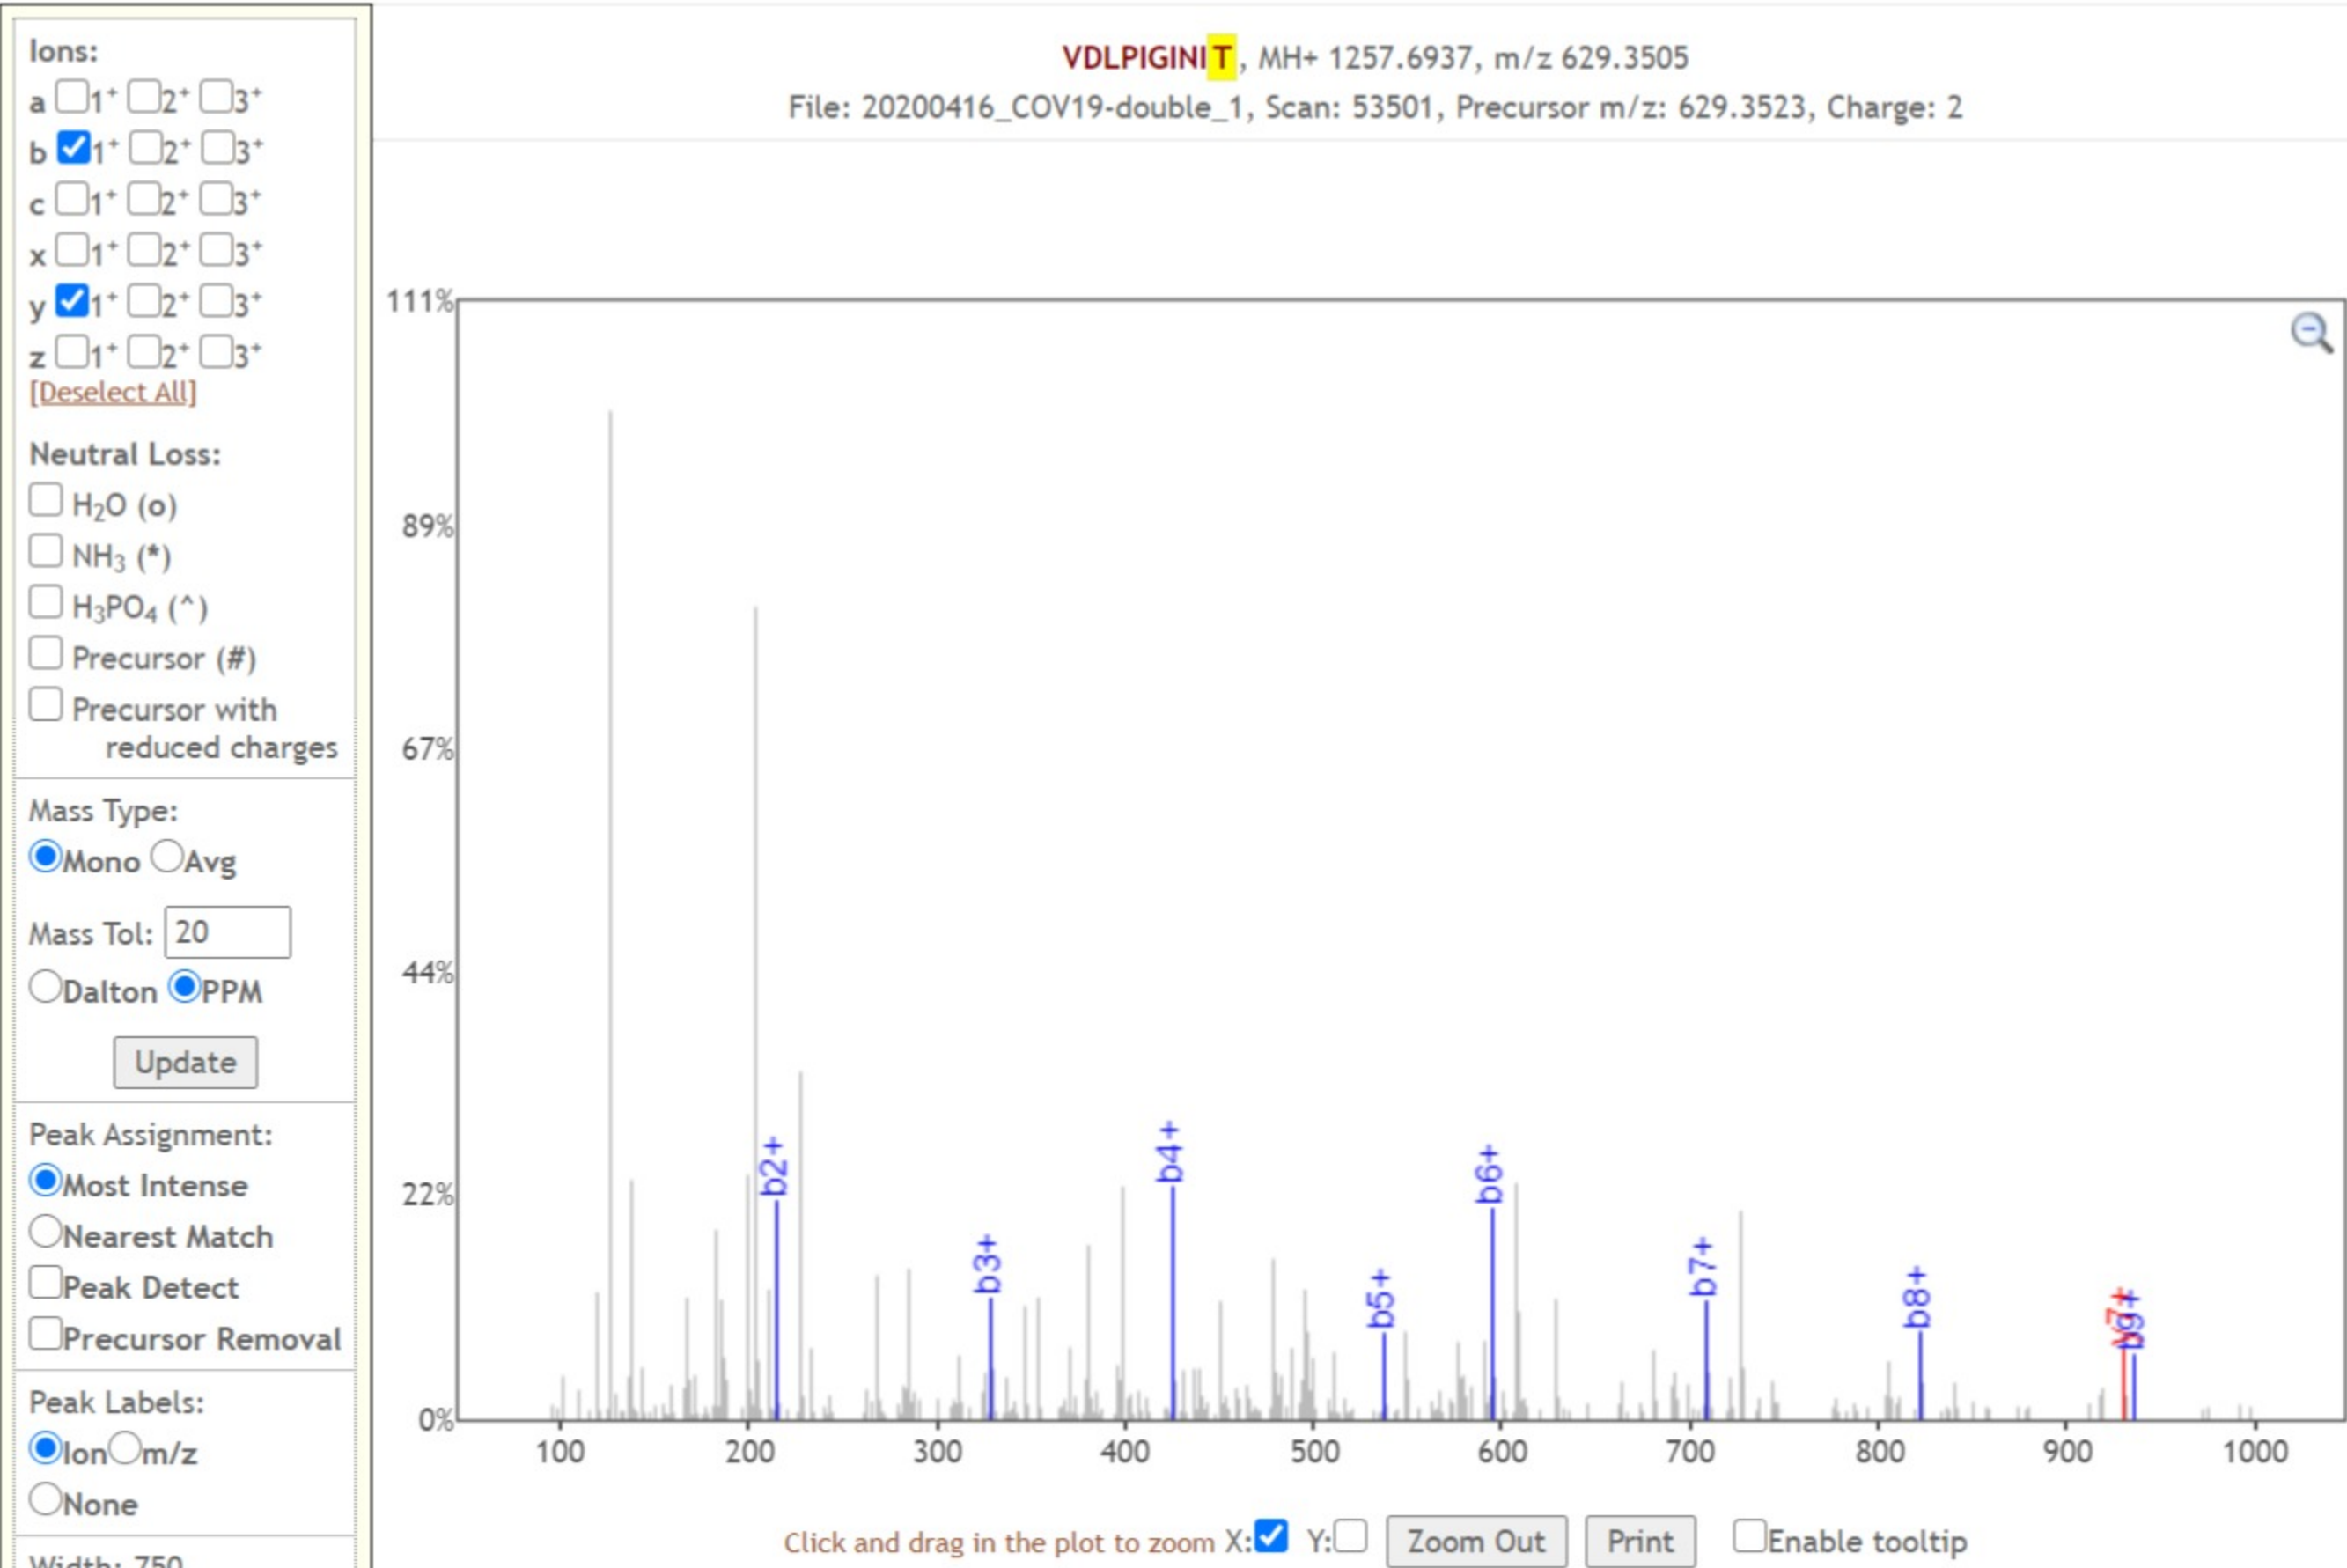

| b+       | #  | Seq | #  | y+        |
|----------|----|-----|----|-----------|
| 100.0757 | 1  | V   | 10 |           |
| 215.1026 | 2  | D   | 9  | 1158.6252 |
| 328.1867 | 3  | L   | 8  | 1043.5983 |
| 425.2395 | 4  | P   | 7  | 930.5142  |
| 538.3235 | 5  | I   | 6  | 833.4615  |
| 595.3450 | 6  | G   | 5  | 720.3774  |
| 708.4291 | 7  | I   | 4  | 663.3559  |
| 822.4720 | 8  | N   | 3  | 550.2719  |
| 935.5560 | 9  | I   | 2  | 436.2290  |
|          | 10 | T   | 1  | 323.1449  |

[\[Click\]](#) to move table

Static Modifications:  
C: 57.02146

Variable Modifications:  
T: 203.079373
