# Supplementary material for: Site-Specific O-Glycosylation Analysis of SARS-CoV-2 Spike Protein Produced in Insect and Human Cells
Source: MDPI journal article supplement (doi:10.3390/v13040551), 2021-03-25
Supplement: s1 [file s1]

# Fragment Ion View

Project name: 20200330COV19  
Sample name: 20200416\_COV19-double\_1  
Created date: 2020-04-18 15:22:56.0  
Search name:  
Activation type: CID

Peptide sequence: R.EGVFVSN(2.988261)GTHWF.V  
Scan number: 53387  
Calculated M+H: 1382.6261  
Measured M+H: 1382.631  
Charge state: 2  
File name: 20200416\_COV19-double\_1  
search type: light

Ions:

a☐1<sup>+</sup>☐2<sup>+</sup>☐3<sup>+</sup>

b☒1<sup>+</sup>☐2<sup>+</sup>☐3<sup>+</sup>

c☐1<sup>+</sup>☐2<sup>+</sup>☐3<sup>+</sup>

x☐1<sup>+</sup>☐2<sup>+</sup>☐3<sup>+</sup>

y☒1<sup>+</sup>☐2<sup>+</sup>☐3<sup>+</sup>

z☐1<sup>+</sup>☐2<sup>+</sup>☐3<sup>+</sup>

[Deselect All]

Neutral Loss:

☐H<sub>2</sub>O (o)

☐NH<sub>3</sub> (\*)

☐H<sub>3</sub>PO<sub>4</sub> (^)

☐Precursor (#)

☐Precursor with reduced charges

Mass Type:

☒Mono☐Avg

Mass Tol:

☐Dalton☒PPM

Update

Peak Assignment:

☒Most Intense

☐Nearest Match

☐Peak Detect

☐Precursor Removal

Peak Labels:

☒Ion☐m/z

☐None

Width: 750

Height: 450

EGVFVS**N**GTHWF, MH+ 1382.6261, m/z 691.8167

File: 20200416\_COV19-double\_1, Scan: 53387, Precursor m/z: 691.81915, Charge: 2

| b <sup>+</sup> | #  | Seq | #  | y <sup>+</sup> |
|----------------|----|-----|----|----------------|
| 130.0499       | 1  | E   | 12 |                |
| 187.0713       | 2  | G   | 11 | 1253.5835      |
| 286.1397       | 3  | V   | 10 | 1196.5621      |
| 433.2082       | 4  | F   | 9  | 1097.4937      |
| 532.2766       | 5  | V   | 8  | 950.4253       |
| 619.3086       | 6  | S   | 7  | 851.3568       |
| 736.3398       | 7  | N   | 6  | 764.3248       |
| 793.3613       | 8  | G   | 5  | 647.2936       |
| 894.4089       | 9  | T   | 4  | 590.2722       |
| 1031.4678      | 10 | H   | 3  | 489.2245       |
| 1217.5472      | 11 | W   | 2  | 352.1656       |
|                | 12 | F   | 1  | 166.0863       |

[Click] to move table

Static Modifications:  
C: 57.02146

Variable Modifications:  
N: 2.988261
