# Supplementary material for: Site-Specific O-Glycosylation Analysis of SARS-CoV-2 Spike Protein Produced in Insect and Human Cells
Source: MDPI journal article supplement (doi:10.3390/v13040551), 2021-03-25
Supplement: s1 [file s1]

# Fragment Ion View

Project name: 20200330COV19  
Sample name: 20200416\_COV19-double\_2  
Created date: 2020-04-18 15:22:56.0  
Search name:  
Activation type: CID  
  
Peptide sequence: K.TQSLLIVN(203.079373)NATNVVVIK.V  
Scan number: 49009  
Calculated M+H: 1930.0856  
Measured M+H: 1930.0911  
Charge state: 2  
File name: 20200416\_COV19-double\_2  
search type: light

Ions:  
c ☐ 1+ ☐ 2+ ☐ 3+  
x ☐ 1+ ☐ 2+ ☐ 3+  
y ☒ 1+ ☐ 2+ ☐ 3+  
z ☐ 1+ ☐ 2+ ☐ 3+  
[\[Deselect All\]](#)

Neutral Loss:  
☐ H<sub>2</sub>O (o)  
☐ NH<sub>3</sub> (\*)  
☐ H<sub>3</sub>PO<sub>4</sub> (^)  
☐ Precursor (#)  
☐ Precursor with reduced charges

Mass Type:  
☒ Mono ☐ Avg  
Mass Tol:   
☐ Dalton ☒ PPM  

Update

Peak Assignment:  
☒ Most Intense  
☐ Nearest Match  
☐ Peak Detect  
☐ Precursor Removal

Peak Labels:  
☒ Ion ☐ m/z  
☐ None

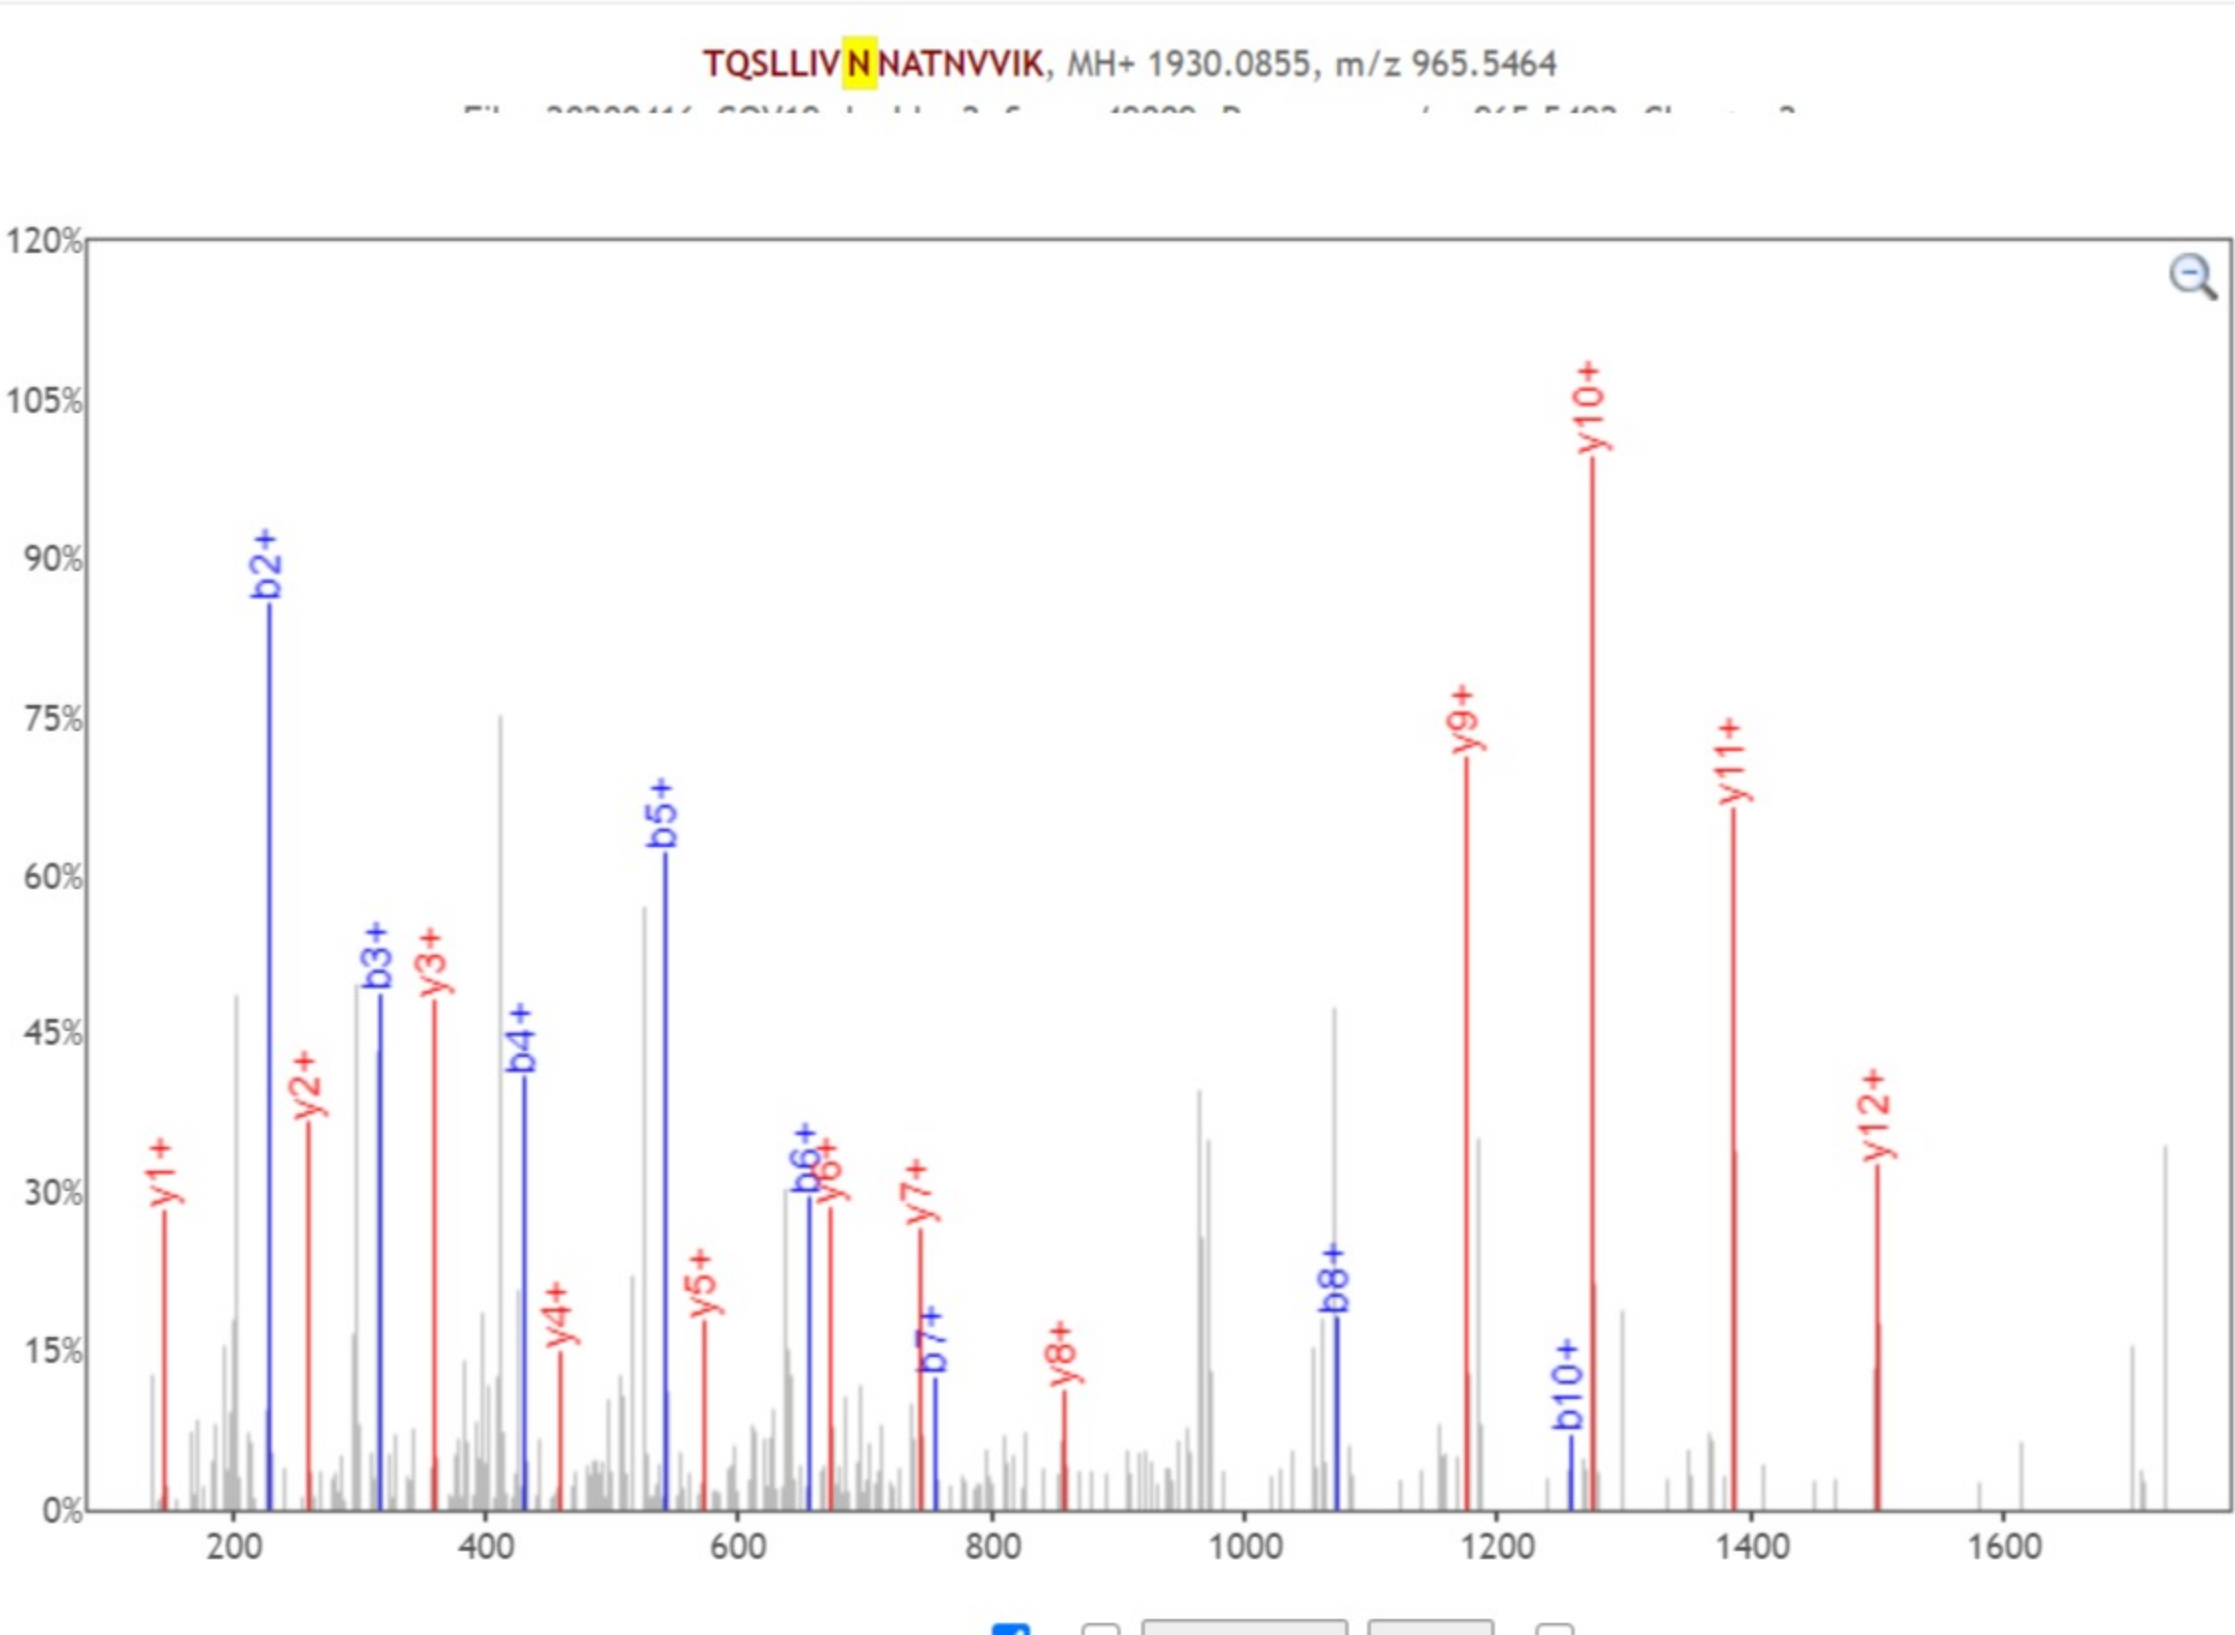

| b+        | #  | Seq | #  | y+        |
|-----------|----|-----|----|-----------|
| 102.0550  | 1  | T   | 16 |           |
| 317.1456  | 3  | S   | 14 | 1700.9793 |
| 430.2296  | 4  | L   | 13 | 1613.9472 |
| 543.3137  | 5  | L   | 12 | 1500.8632 |
| 656.3978  | 6  | I   | 11 | 1387.7791 |
| 755.4662  | 7  | V   | 10 | 1274.6951 |
| 1072.5885 | 8  | N   | 9  | 1175.6266 |
| 1186.6314 | 9  | N   | 8  | 858.5043  |
| 1257.6685 | 10 | A   | 7  | 744.4614  |
| 1358.7162 | 11 | T   | 6  | 673.4243  |
| 1472.7591 | 12 | N   | 5  | 572.3766  |
| 1571.8275 | 13 | V   | 4  | 458.3337  |
| 1670.8959 | 14 | V   | 3  | 359.2653  |
| 1783.9800 | 15 | I   | 2  | 260.1969  |
|           | 16 | K   | 1  | 147.1128  |

[\[Click\]](#) to move table

Static Modifications:  
C: 57.02146

Variable Modifications:  
N: 203.079373
