# Supplementary material for: Site-Specific O-Glycosylation Analysis of SARS-CoV-2 Spike Protein Produced in Insect and Human Cells
Source: MDPI journal article supplement (doi:10.3390/v13040551), 2021-03-25
Supplement: s1 [file s1]

Fragment Ion View

Project name: 20200330COV19  
Sample name: 20200416\_COV19-double\_2  
Created date: 2020-04-18 15:22:56.0  
Search name:  
Activation type: CID

Peptide sequence: R.SSVLHSTQDLFLPFFSNVT(203.079373)WF.H  
Scan number: 56810  
Calculated M+H: 2675.3027  
Measured M+H: 2675.3083  
Charge state: 2  
File name: 20200416\_COV19-double\_2  
search type: light

Ions:  
a ☐1+ ☐2+ ☐3+  
b ☒1+ ☐2+ ☐3+  
c ☐1+ ☐2+ ☐3+  
x ☐1+ ☐2+ ☐3+  
y ☒1+ ☐2+ ☐3+  
z ☐1+ ☐2+ ☐3+  
[\[Deselect All\]](#)

Neutral Loss:  
☐ H<sub>2</sub>O (o)  
☐ NH<sub>3</sub> (\*)  
☐ H<sub>3</sub>PO<sub>4</sub> (^)  
☐ Precursor (#)  
☐ Precursor with reduced charges

Mass Type:  
☒ Mono ☐ Avg  
Mass Tol:   
☐ Dalton ☒ PPM  

Update

Peak Assignment:  
☒ Most Intense  
☐ Nearest Match  
☐ Peak Detect  
☐ Precursor Removal

Peak Labels:  
☒ Ion ☐ m/z  
☐ None

Width: 750  
  
Height: 450

SSVLHSTQDLFLPFFSNVTWF, MH+ 2675.3028, m/z 1338.1550  
File: 20200416\_COV19-double\_2, Scan: 56810, Precursor m/z: 1338.1578, Charge: 2

Click and drag in the plot to zoom X: ☒ Y: ☐

Zoom Out

Print

☐ Enable tooltip

| b+        | #  | Seq | #  | y+        |
|-----------|----|-----|----|-----------|
| 88.0393   | 1  | S   | 21 |           |
| 175.0713  | 2  | S   | 20 | 2588.2708 |
| 274.1397  | 3  | V   | 19 | 2501.2387 |
| 387.2238  | 4  | L   | 18 | 2402.1703 |
| 524.2827  | 5  | H   | 17 | 2289.0863 |
| 611.3148  | 6  | S   | 16 | 2152.0274 |
| 712.3624  | 7  | T   | 15 | 2064.9953 |
| 840.4210  | 8  | Q   | 14 | 1963.9476 |
| 955.4480  | 9  | D   | 13 | 1835.8891 |
| 1068.5320 | 10 | L   | 12 | 1720.8621 |
| 1215.6004 | 11 | F   | 11 | 1607.7781 |
| 1328.6845 | 12 | L   | 10 | 1460.7096 |
| 1425.7373 | 13 | P   | 9  | 1347.6256 |
| 1572.8057 | 14 | F   | 8  | 1250.5728 |
| 1719.8741 | 15 | F   | 7  | 1103.5044 |
| 1806.9061 | 16 | S   | 6  | 956.4360  |
| 1920.9490 | 17 | N   | 5  | 869.4040  |
| 2020.0175 | 18 | V   | 4  | 755.3610  |
| 2324.1445 | 19 | T   | 3  | 656.2926  |
| 2510.2238 | 20 | W   | 2  | 352.1656  |
|           | 21 | F   | 1  | 166.0863  |

[\[Click\]](#) to move table  
Static Modifications:  
C: 57.02146  
Variable Modifications:  
T: 203.079373
