# Supplementary material for: Site-Specific O-Glycosylation Analysis of SARS-CoV-2 Spike Protein Produced in Insect and Human Cells
Source: MDPI journal article supplement (doi:10.3390/v13040551), 2021-03-25
Supplement: s1 [file s1]

Fragment Ion View

Project name: 20200330COV19  
Sample name: 20200416\_COV19-double\_2  
Created date: 2020-04-18 15:22:56.0  
Search name:  
Activation type: CID

Peptide sequence: R.EGVFVSN(2.988261)GTHWF.V  
Scan number: 53355  
Calculated M+H: 1382.6261  
Measured M+H: 1382.6302  
Charge state: 2  
File name: 20200416\_COV19-double\_2  
search type: light

Ions:  
a ☐1+ ☐2+ ☐3+  
b ☒1+ ☐2+ ☐3+  
c ☐1+ ☐2+ ☐3+  
x ☐1+ ☐2+ ☐3+  
y ☒1+ ☐2+ ☐3+  
z ☐1+ ☐2+ ☐3+  
[\[Deselect All\]](#)

Neutral Loss:  
☐ H<sub>2</sub>O (o)  
☐ NH<sub>3</sub> (\*)  
☐ H<sub>3</sub>PO<sub>4</sub> (^)  
☐ Precursor (#)  
☐ Precursor with reduced charges

Mass Type:  
☒ Mono ☐ Avg  
Mass Tol:   
☐ Dalton ☒ PPM  

Update

Peak Assignment:  
☒ Most Intense  
☐ Nearest Match  
☐ Peak Detect  
☐ Precursor Removal

Peak Labels:  
☒ Ion ☐ m/z  
☐ None

Width:   
Height:

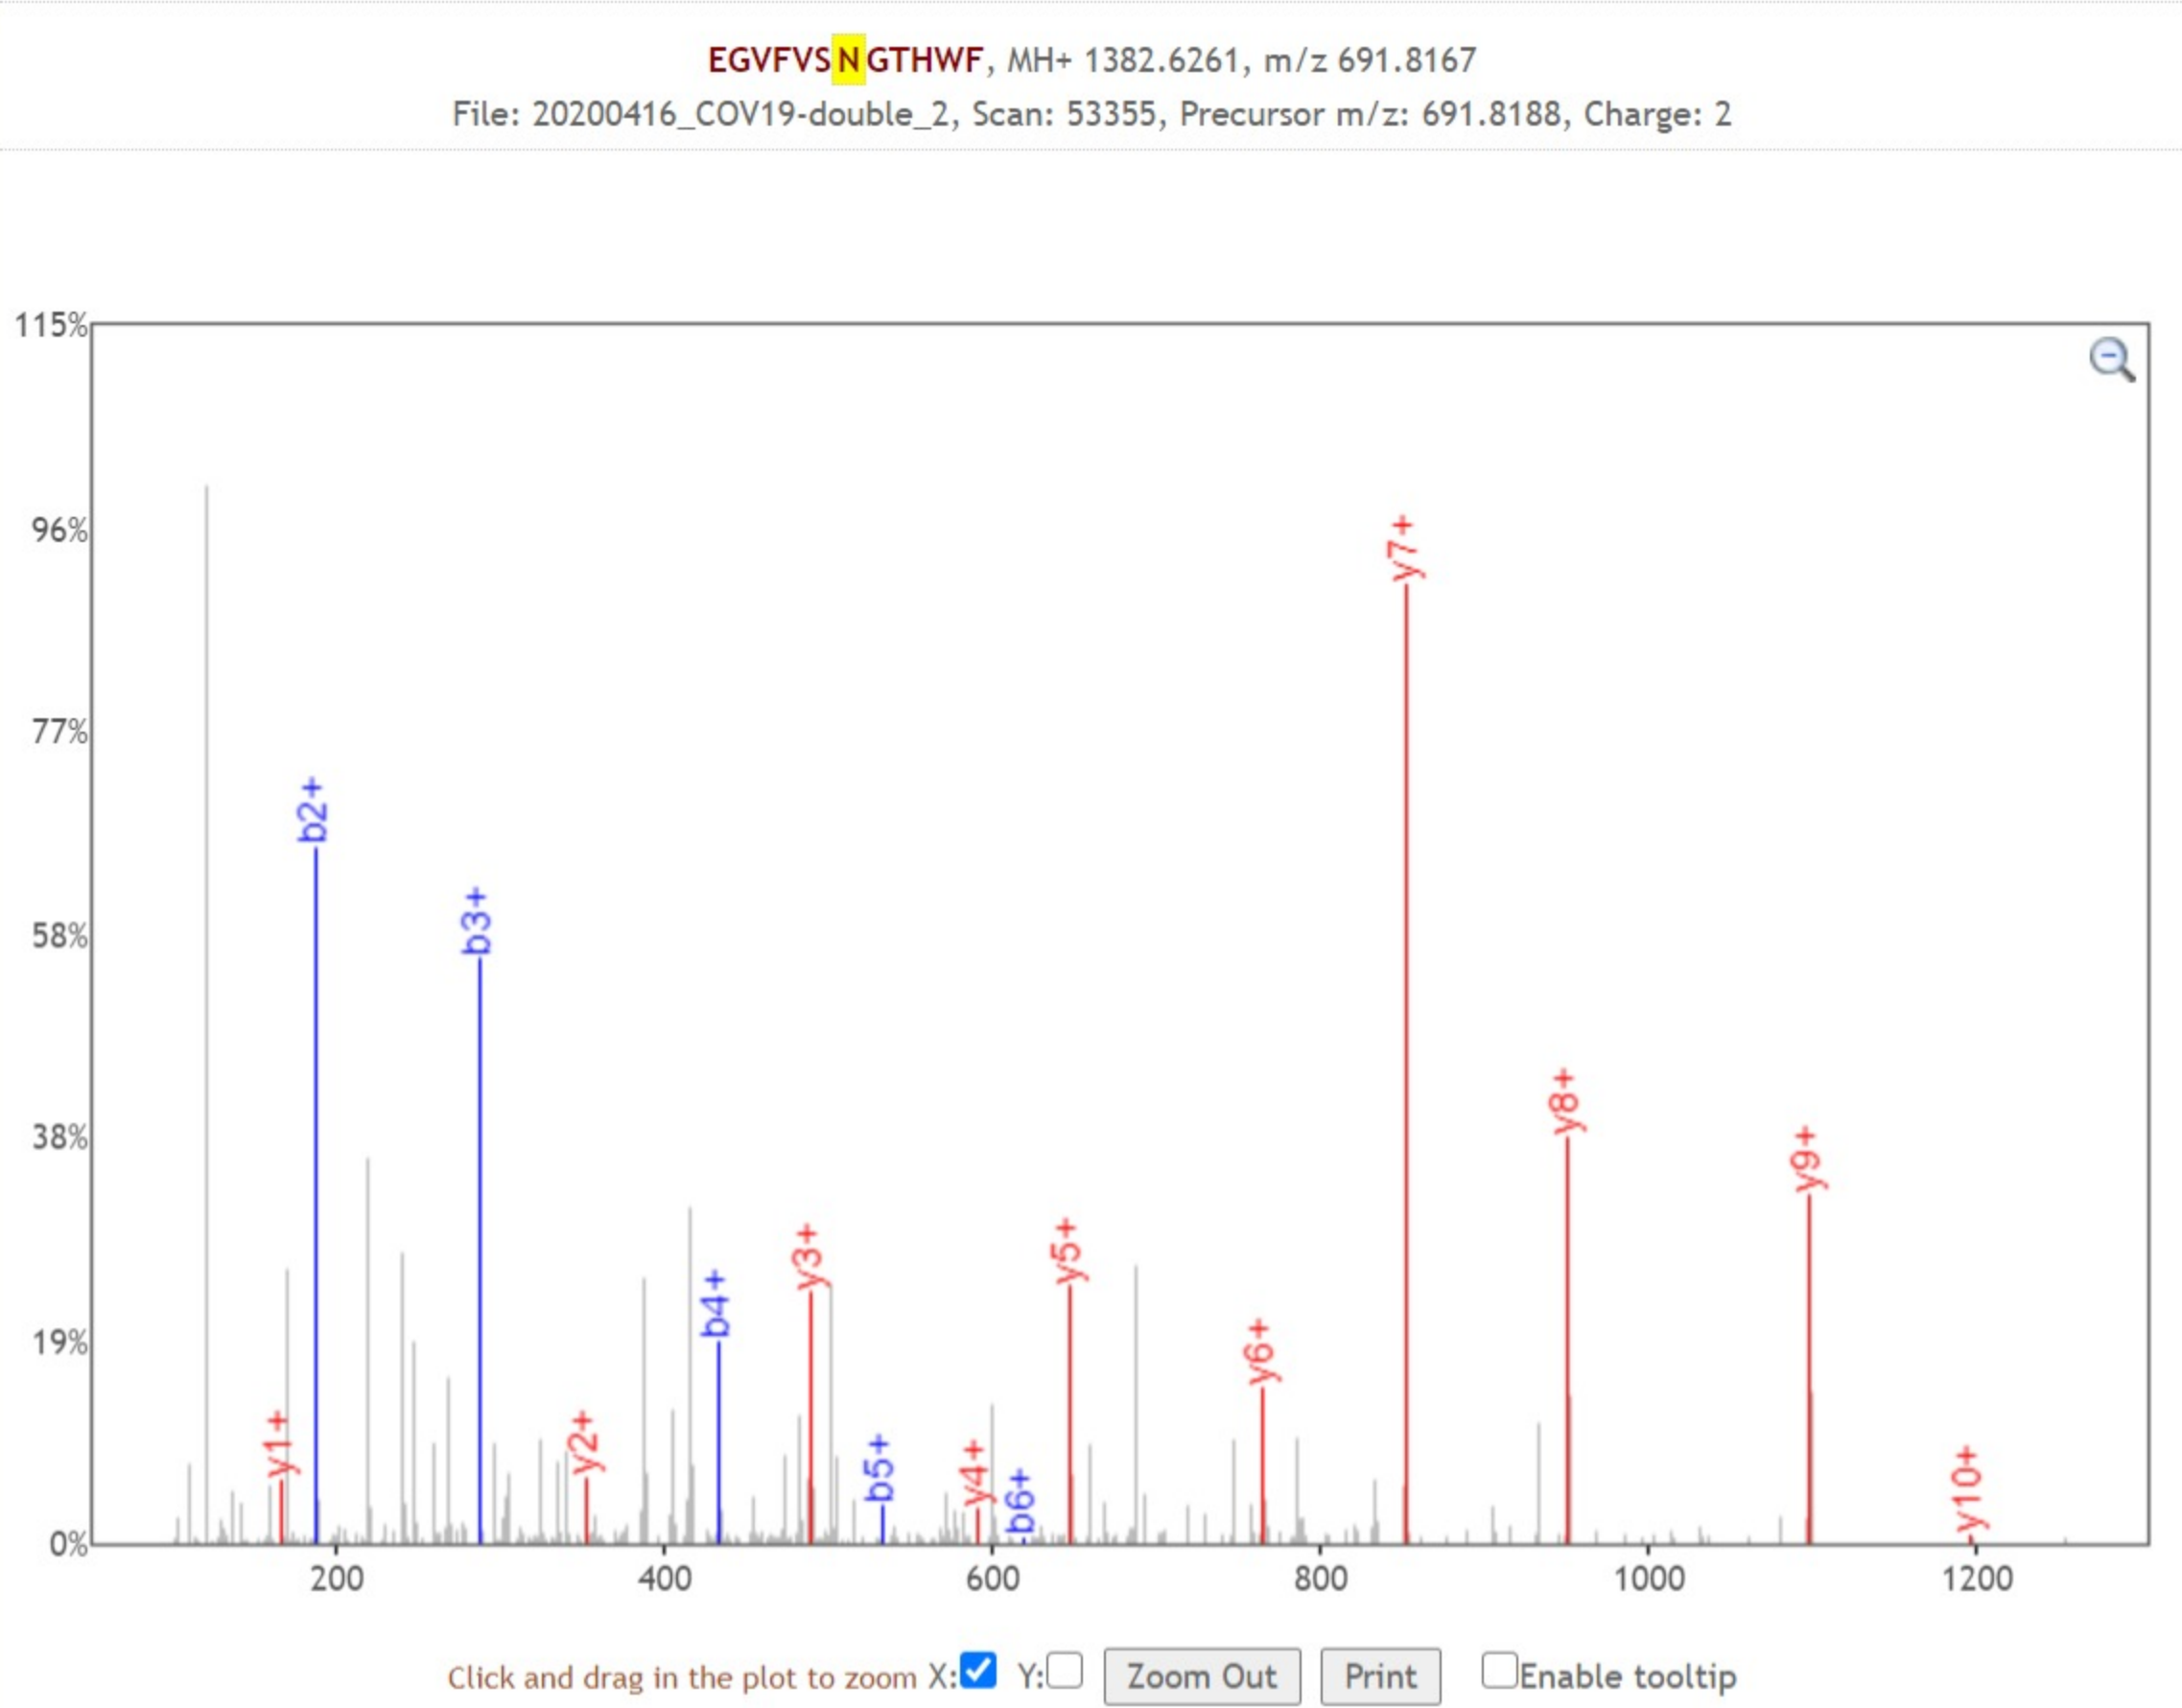

| b+        | #  | Seq | #  | y+        |
|-----------|----|-----|----|-----------|
| 130.0499  | 1  | E   | 12 |           |
| 187.0713  | 2  | G   | 11 | 1253.5835 |
| 286.1397  | 3  | V   | 10 | 1196.5621 |
| 433.2082  | 4  | F   | 9  | 1097.4937 |
| 532.2766  | 5  | V   | 8  | 950.4253  |
| 619.3086  | 6  | S   | 7  | 851.3568  |
| 736.3398  | 7  | N   | 6  | 764.3248  |
| 793.3613  | 8  | G   | 5  | 647.2936  |
| 894.4089  | 9  | T   | 4  | 590.2722  |
| 1031.4678 | 10 | H   | 3  | 489.2245  |
| 1217.5472 | 11 | W   | 2  | 352.1656  |
|           | 12 | F   | 1  | 166.0863  |

[\[Click\]](#) to move table  
Static Modifications:  
C: 57.02146  
Variable Modifications:  
N: 2.988261
