# Supplementary material for: Site-Specific O-Glycosylation Analysis of SARS-CoV-2 Spike Protein Produced in Insect and Human Cells
Source: MDPI journal article supplement (doi:10.3390/v13040551), 2021-03-25
Supplement: s1 [file s1]

search type: light

FSNV TWFHAIHVS GT N GTK, MH+ 2309.1083, m/z 578.0325  
File: 20200416\_COV19-double\_2, Scan: 47985, Precursor m/z: 578.0349, Charge: 4

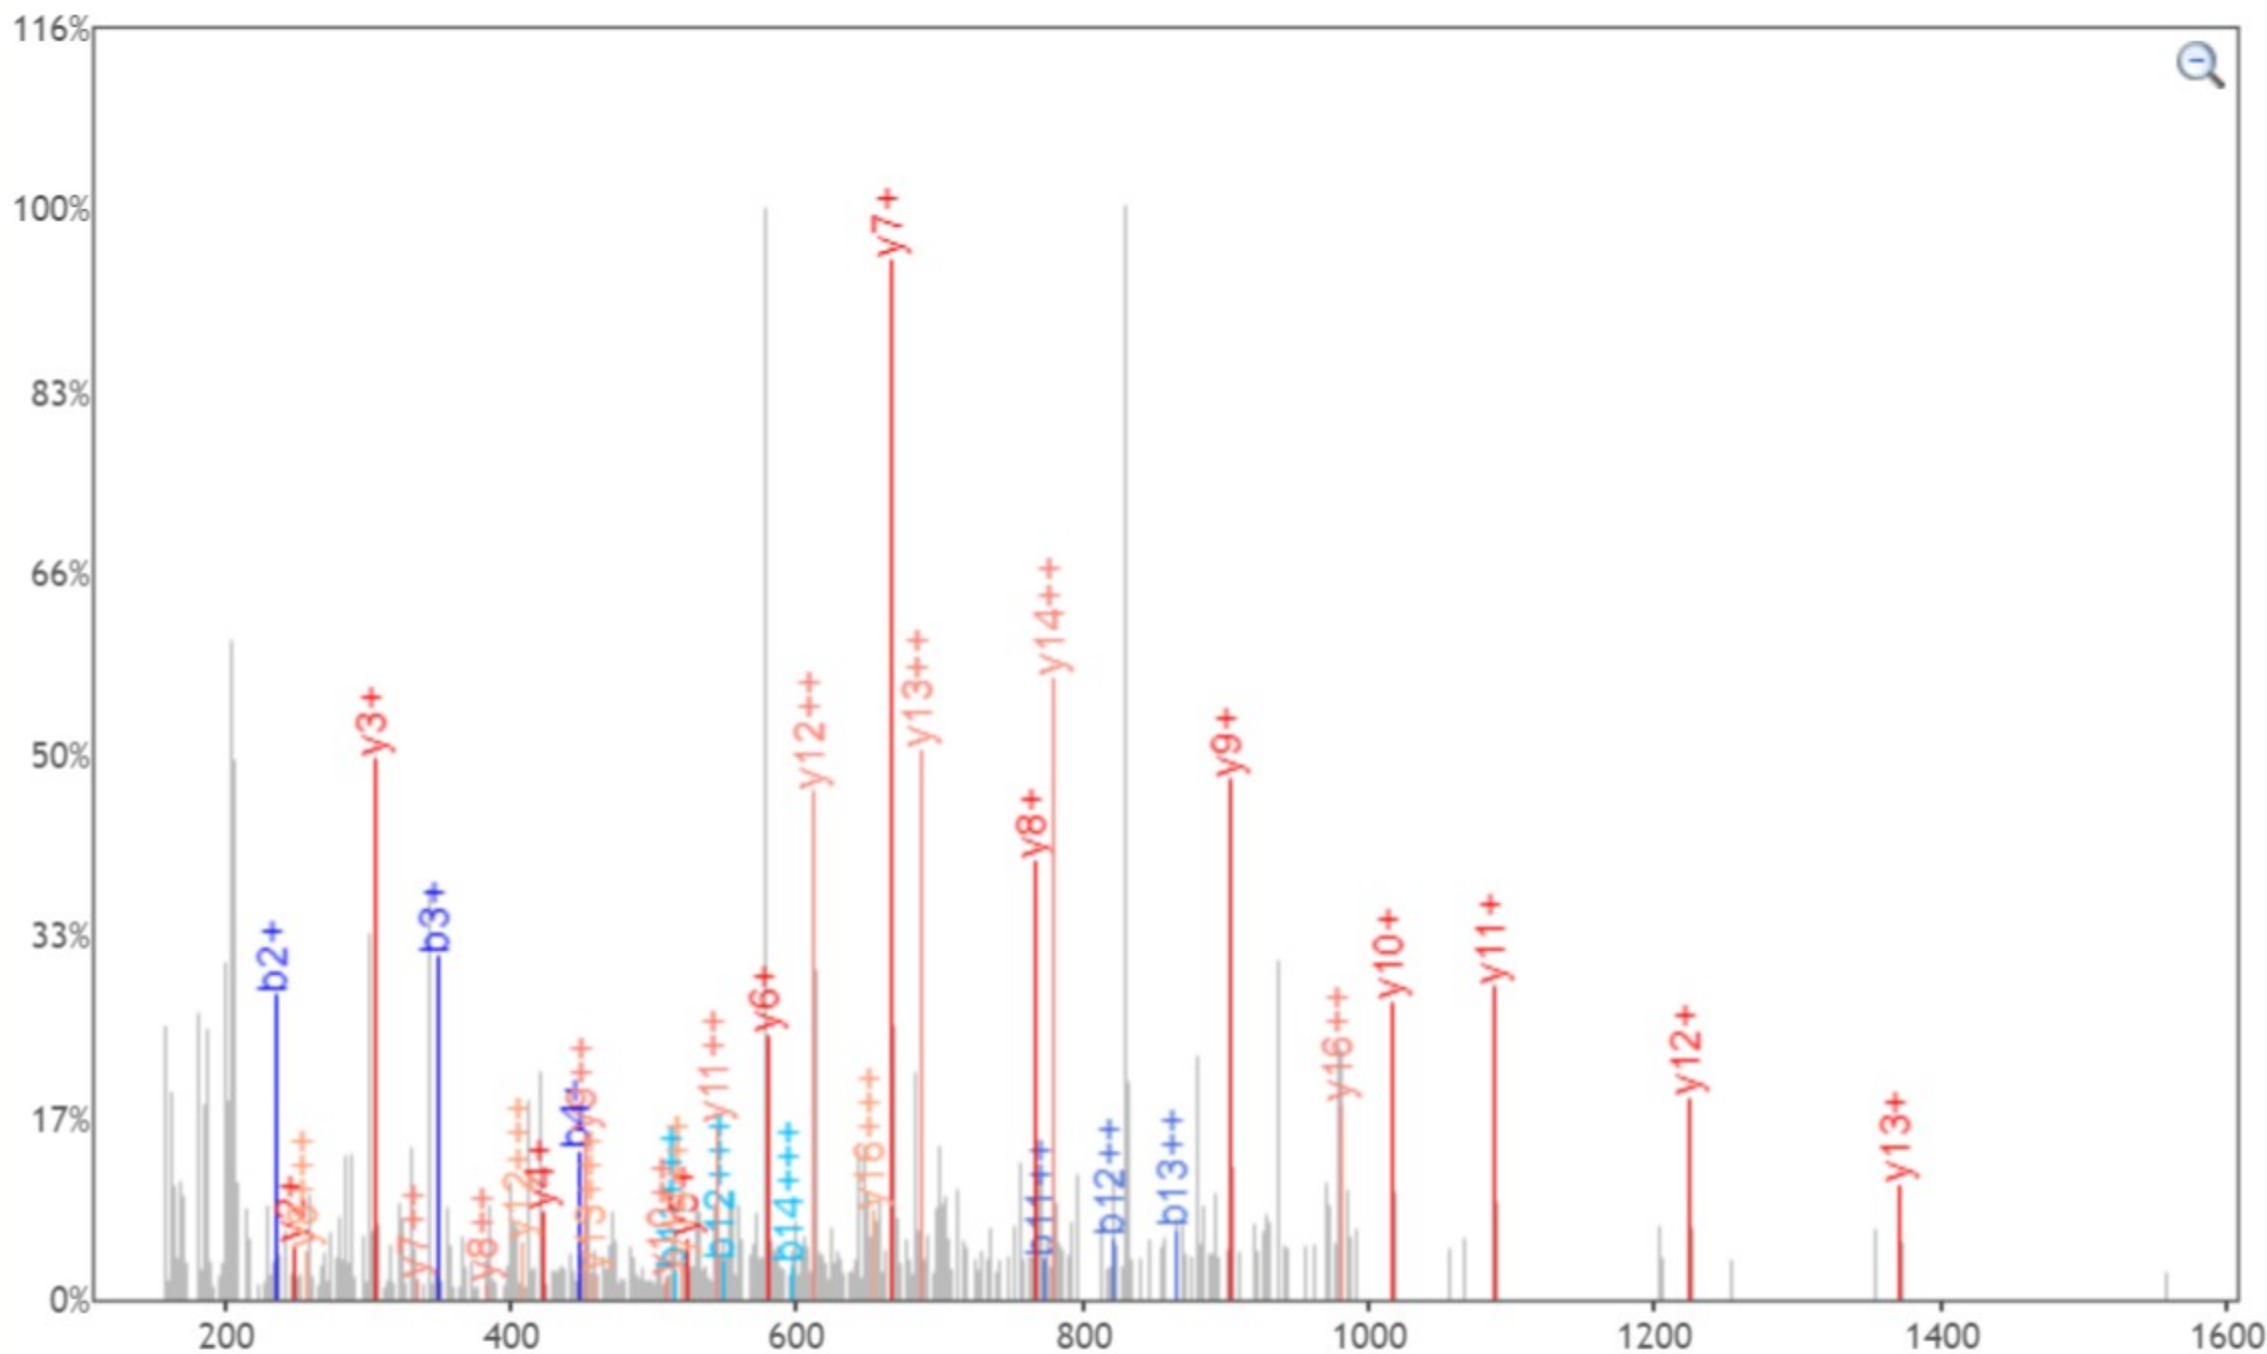

Click and drag in the plot to zoom X: ☒ Y: ☐   ☐ Enable tooltip

| b+        | b2+       | b3+      | #  | Seq | #  | y+        | y2+       | y3+      |
|-----------|-----------|----------|----|-----|----|-----------|-----------|----------|
| 148.0757  | 74.5415   | 50.0301  | 1  | F   | 19 |           |           |          |
| 235.1077  | 118.0575  | 79.0408  | 2  | S   | 18 | 2162.0399 | 1081.5236 | 721.3515 |
| 349.1506  | 175.0790  | 117.0551 | 3  | N   | 17 | 2075.0078 | 1038.0076 | 692.3408 |
| 448.2191  | 224.6132  | 150.0779 | 4  | V   | 16 | 1960.9649 | 980.9861  | 654.3265 |
| 752.3461  | 376.6767  | 251.4536 | 5  | T   | 15 | 1861.8965 | 931.4519  | 621.3037 |
| 938.4254  | 469.7164  | 313.4800 | 6  | W   | 14 | 1557.7694 | 779.3884  | 519.9280 |
| 1085.4938 | 543.2506  | 362.5028 | 7  | F   | 13 | 1371.6901 | 686.3487  | 457.9016 |
| 1222.5528 | 611.7800  | 408.1891 | 8  | H   | 12 | 1224.6217 | 612.8145  | 408.8788 |
| 1293.5899 | 647.2986  | 431.8681 | 9  | A   | 11 | 1087.5628 | 544.2850  | 363.1925 |
| 1406.6739 | 703.8406  | 469.5628 | 10 | I   | 10 | 1016.5257 | 508.7665  | 339.5134 |
| 1543.7328 | 772.3701  | 515.2491 | 11 | H   | 9  | 903.4416  | 452.2245  | 301.8187 |
| 1642.8013 | 821.9043  | 548.2719 | 12 | V   | 8  | 766.3827  | 383.6950  | 256.1324 |
| 1729.8333 | 865.4203  | 577.2826 | 13 | S   | 7  | 667.3143  | 334.1608  | 223.1096 |
| 1786.8547 | 893.9310  | 596.2898 | 14 | G   | 6  | 580.2823  | 290.6448  | 194.0989 |
| 1887.9024 | 944.4549  | 629.9723 | 15 | T   | 5  | 523.2608  | 262.1340  | 175.0918 |
| 2004.9336 | 1002.9704 | 668.9827 | 16 | N   | 4  | 422.2131  | 211.6102  | 141.4092 |
| 2061.9551 | 1031.4812 | 687.9899 | 17 | G   | 3  | 305.1819  | 153.0946  | 102.3988 |
| 2163.0028 | 1082.0050 | 721.6724 | 18 | T   | 2  | 248.1605  | 124.5839  | 83.3917  |
|           |           |          | 19 | K   | 1  | 147.1128  | 74.0600   | 49.7091  |

[Click] to move table

### Static Modifications:

C: 57.02146

### Variable Modifications:

T: 203.079373

N: 2.988261
