# Supplementary material for: Site-Specific O-Glycosylation Analysis of SARS-CoV-2 Spike Protein Produced in Insect and Human Cells
Source: MDPI journal article supplement (doi:10.3390/v13040551), 2021-03-25
Supplement: s1 [file s1]

Fragment Ion View

Project name: 20200330COV19  
Sample name: 20200416\_COV19-double\_1  
Created date: 2020-04-18 15:22:56.0  
Search name:  
Activation type: CID

Peptide sequence: R.VYSSANNCT(203.079373)FEYVSQPFLMDLEGK.Q  
Scan number: 55874  
Calculated M+H: 3002.3435  
Measured M+H: 3002.3613  
Charge state: 3  
File name: 20200416\_COV19-double\_1  
search type: light

Ions:  
a ☐ 1+ ☐ 2+ ☐ 3+  
b ☒ 1+ ☒ 2+ ☐ 3+  
c ☐ 1+ ☐ 2+ ☐ 3+  
x ☐ 1+ ☐ 2+ ☐ 3+  
y ☒ 1+ ☒ 2+ ☐ 3+  
z ☐ 1+ ☐ 2+ ☐ 3+  
[\[Deselect All\]](#)

Neutral Loss:  
☐ H<sub>2</sub>O (o)  
☐ NH<sub>3</sub> (\*)  
☐ H<sub>3</sub>PO<sub>4</sub> (^)  
☐ Precursor (#)  
☐ Precursor with reduced charges

Mass Type:  
☒ Mono ☐ Avg  
Mass Tol:   
☐ Dalton ☒ PPM  

Update

Peak Assignment:  
☒ Most Intense  
☐ Nearest Match  
☐ Peak Detect  
☐ Precursor Removal

Peak Labels:  
☒ Ion ☐ m/z  
☐ None

Width: 750  
  
Height: 450

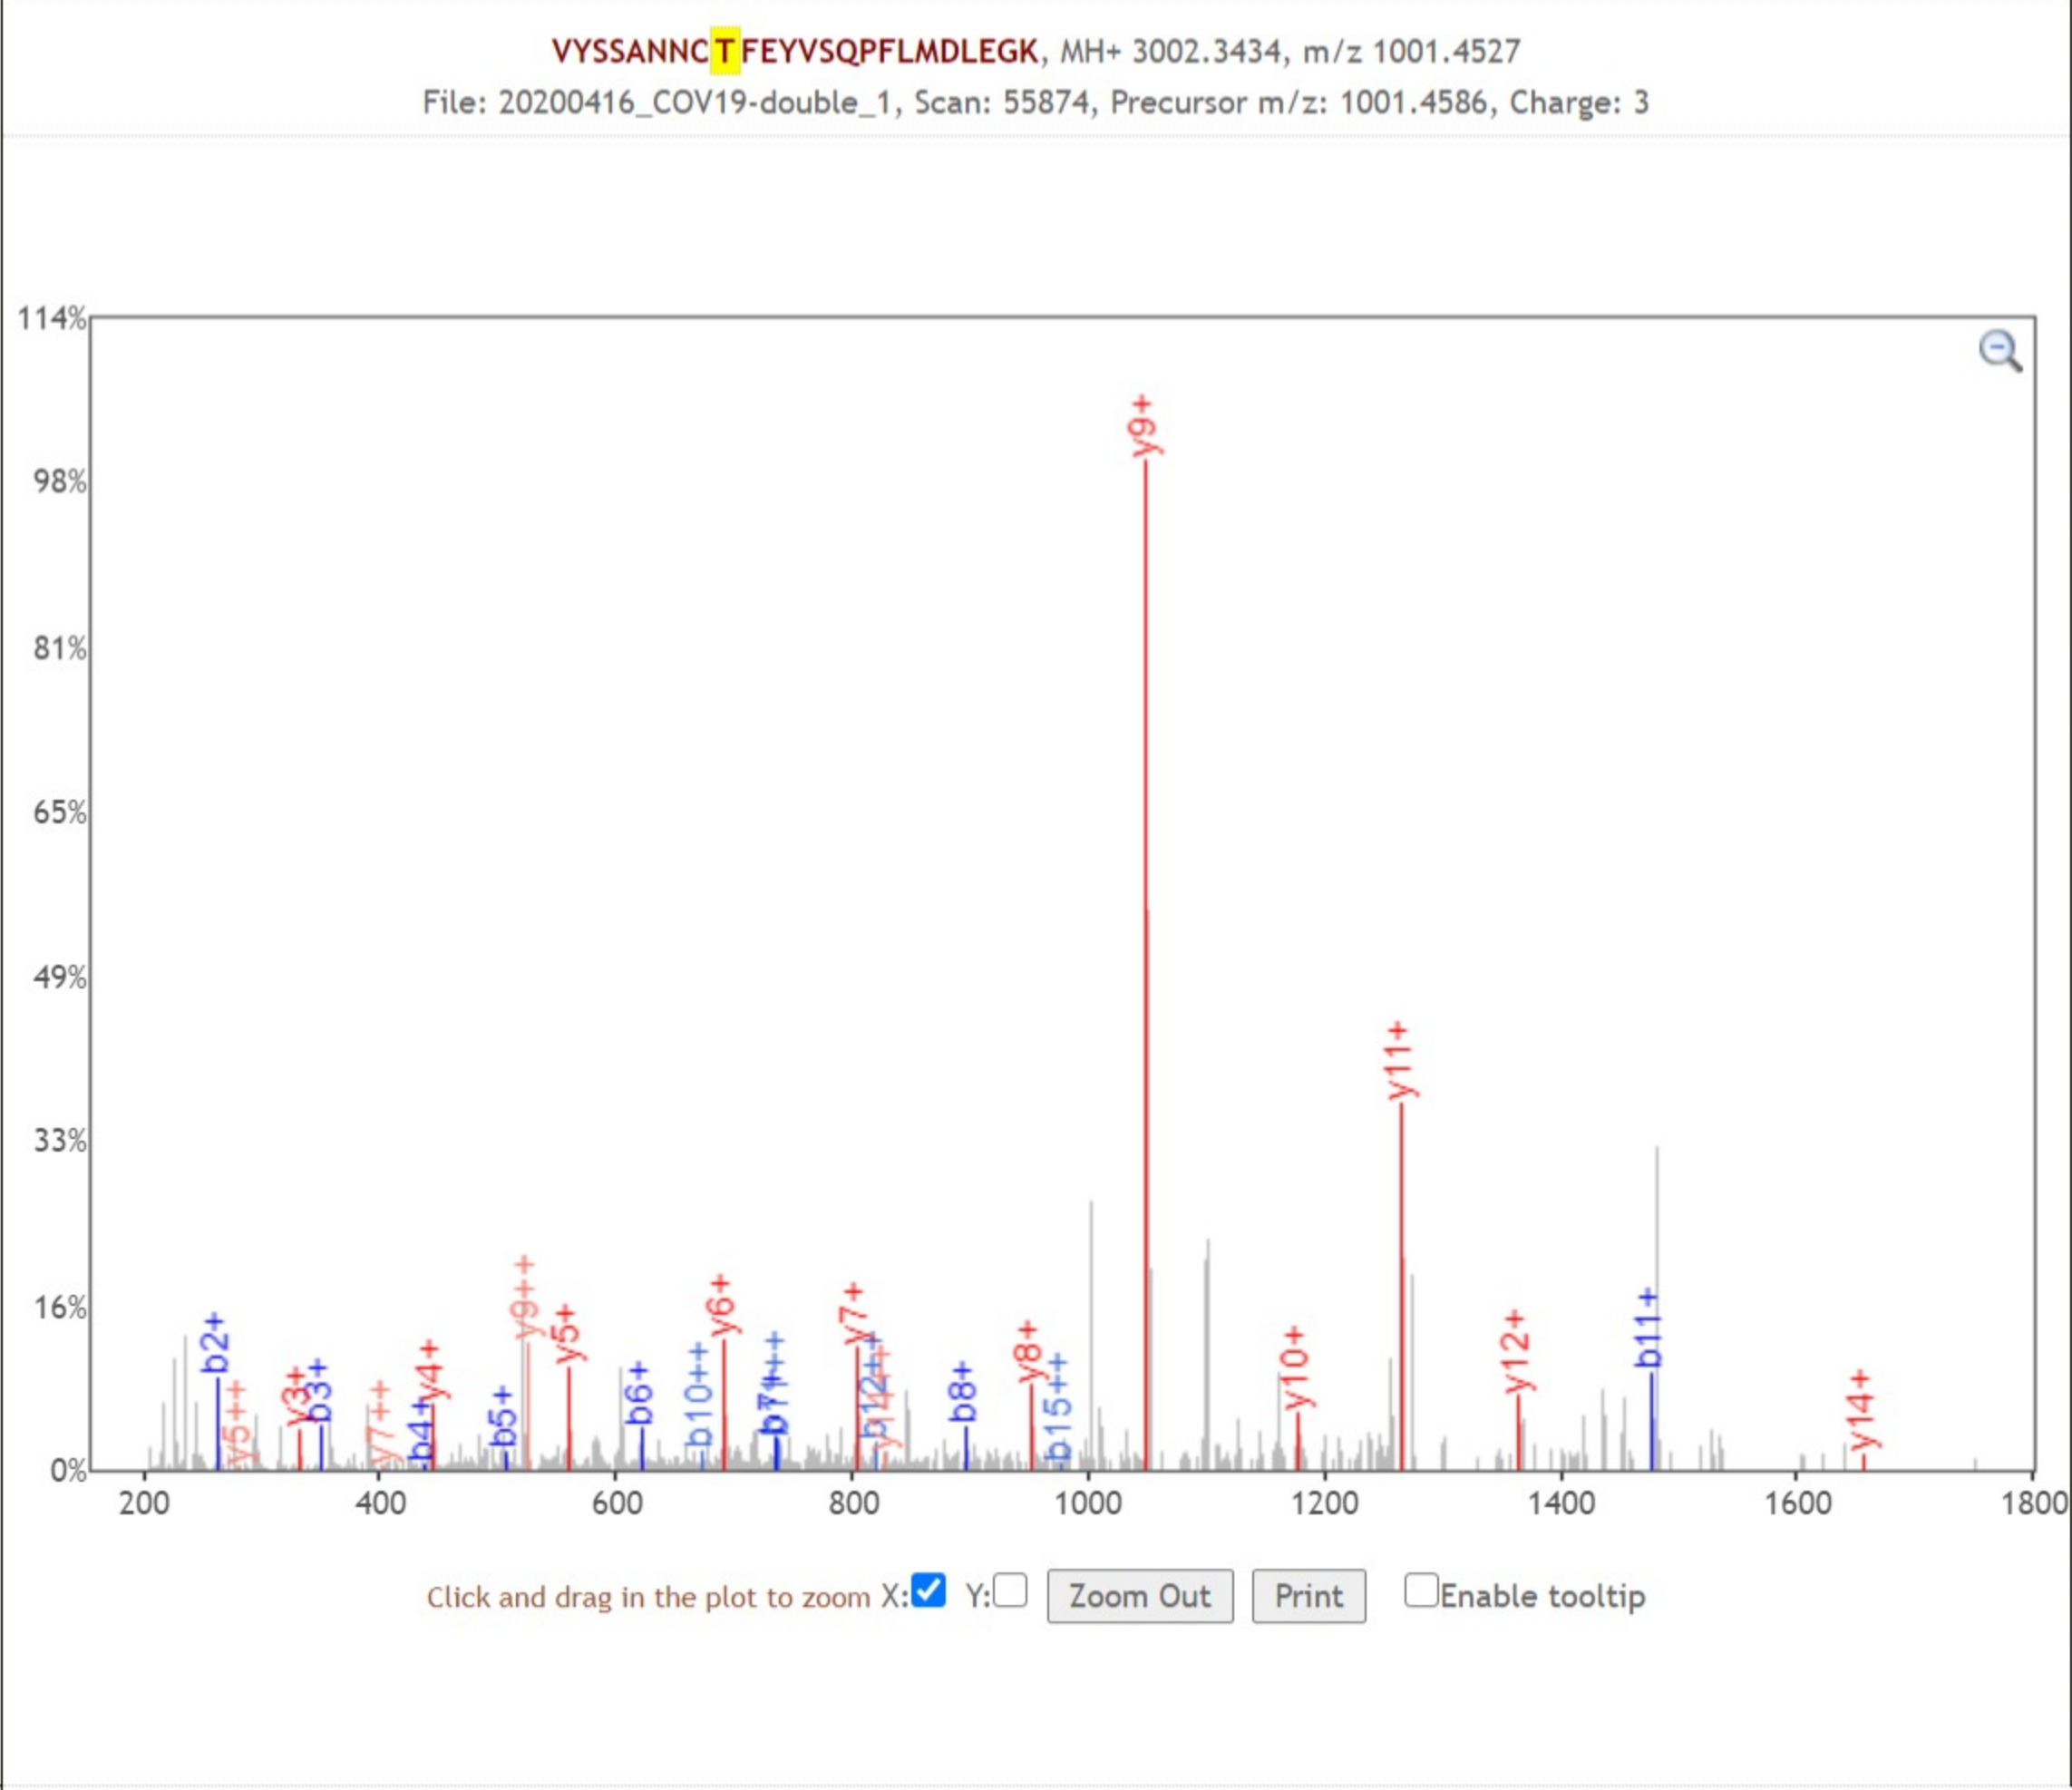

| b+        | b2+       | #  | Seq | #  | y+        | y2+       |
|-----------|-----------|----|-----|----|-----------|-----------|
| 100.0757  | 50.5415   | 1  | V   | 24 |           |           |
| 263.1390  | 132.0731  | 2  | Y   | 23 | 2903.2750 | 1452.1411 |
| 350.1710  | 175.5892  | 3  | S   | 22 | 2740.2117 | 1370.6095 |
| 437.2031  | 219.1052  | 4  | S   | 21 | 2653.1796 | 1327.0935 |
| 508.2402  | 254.6237  | 5  | A   | 20 | 2566.1476 | 1283.5774 |
| 622.2831  | 311.6452  | 6  | N   | 19 | 2495.1105 | 1248.0589 |
| 736.3260  | 368.6667  | 7  | N   | 18 | 2381.0676 | 1191.0374 |
| 896.3567  | 448.6820  | 8  | C   | 17 | 2267.0246 | 1134.0160 |
| 1200.4837 | 600.7455  | 9  | T   | 16 | 2106.9940 | 1054.0006 |
| 1347.5522 | 674.2797  | 10 | F   | 15 | 1802.8669 | 901.9371  |
| 1476.5947 | 738.8010  | 11 | E   | 14 | 1655.7985 | 828.4029  |
| 1639.6581 | 820.3327  | 12 | Y   | 13 | 1526.7559 | 763.8816  |
| 1738.7265 | 869.8669  | 13 | V   | 12 | 1363.6926 | 682.3499  |
| 1825.7585 | 913.3829  | 14 | S   | 11 | 1264.6242 | 632.8157  |
| 1953.8171 | 977.4122  | 15 | Q   | 10 | 1177.5922 | 589.2997  |
| 2050.8699 | 1025.9386 | 16 | P   | 9  | 1049.5336 | 525.2704  |
| 2197.9383 | 1099.4728 | 17 | F   | 8  | 952.4808  | 476.7441  |
| 2311.0223 | 1156.0148 | 18 | L   | 7  | 805.4124  | 403.2098  |
| 2442.0628 | 1221.5350 | 19 | M   | 6  | 692.3284  | 346.6678  |
| 2557.0898 | 1279.0485 | 20 | D   | 5  | 561.2879  | 281.1476  |
| 2670.1738 | 1335.5906 | 21 | L   | 4  | 446.2609  | 223.6341  |
| 2799.2164 | 1400.1118 | 22 | E   | 3  | 333.1769  | 167.0921  |
| 2856.2379 | 1428.6226 | 23 | G   | 2  | 204.1343  | 102.5708  |
|           |           | 24 | K   | 1  | 147.1128  | 74.0600   |

[\[Click\]](#) to move table  
Static Modifications:  
C: 57.02146  
Variable Modifications:  
T: 203.079373
