# Supplementary material for: Site-Specific O-Glycosylation Analysis of SARS-CoV-2 Spike Protein Produced in Insect and Human Cells
Source: Viruses. 2021 Mar 25;13(4):551. doi: 10.3390/v13040551 (PMC8064498; doi:10.3390/v13040551)
Supplement: Supplementary file 1 [file viruses-13-00551-s001.zip]

Archive with 22 entries (22 files):
- Figure S4 Surface exposure analysis.pdf
- __MACOSX/._Figure S4 Surface exposure analysis.pdf
- Captions for supplementary datasets.pdf
- __MACOSX/._Captions for supplementary datasets.pdf
- Dataset S1. List of peptides Orbitrap Fusion Lumos.xlsx
- __MACOSX/._Dataset S1. List of peptides Orbitrap Fusion Lumos.xlsx
- Dataset S4. Occupancy estimation insect ectodomain.xlsx
- __MACOSX/._Dataset S4. Occupancy estimation insect ectodomain.xlsx
- Figure S3 Spectra Orbitrap Fusion Lumos ETD.pdf
- __MACOSX/._Figure S3 Spectra Orbitrap Fusion Lumos ETD.pdf
- Figures S1 and S2 In gel digestion and total ion chromatograms.pdf
- __MACOSX/._Figures S1 and S2 In gel digestion and total ion chromatograms.pdf
- Dataset S6. Occupancy estimation Q Exactive.xlsx
- __MACOSX/._Dataset S6. Occupancy estimation Q Exactive.xlsx
- Dataset S3. Occupancy estimation insect monomer.xlsx
- __MACOSX/._Dataset S3. Occupancy estimation insect monomer.xlsx
- Dataset S5. Occupancy estimation HEK 293F ectodomain.xlsx
- __MACOSX/._Dataset S5. Occupancy estimation HEK 293F ectodomain.xlsx
- Dataset S7. Spectra Q Exactive.zip
- __MACOSX/._Dataset S7. Spectra Q Exactive.zip
- Dataset S2. List of peptides Q Exactive HEK 293F ectodomain.xlsx
- __MACOSX/._Dataset S2. List of peptides Q Exactive HEK 293F ectodomain.xlsx
