# Supplementary material for: Site-Specific O-Glycosylation Analysis of SARS-CoV-2 Spike Protein Produced in Insect and Human Cells
Source: Viruses. 2021 Mar 25;13(4):551. doi: 10.3390/v13040551 (PMC8064498; doi:10.3390/v13040551)
Supplement: Supplementary file 1 [file viruses-13-00551-s001.zip › Dataset S1. List of peptides Orbitrap Fusion Lumos.xlsx]

## Sheet: Tab legend
i1	monomeric RBD expressed in insect cells
i3	ectodomain expressed in insect cells
h3m	ectodomain expressed in HEK 293F cells
Chy	chymotrypsin
GluTry	Glu-C followed by trypsin
PSMs	expandable tables including peptide spectrum matches for individual peptide groups

## Sheet: PeptideGroups i1 Chy
Checked	Confidence	Annotated Sequence	Modifications	Modifications in Proteins	Contaminant	Qvality PEP	Qvality q-value	# Protein Groups	# Proteins	# PSMs	Master Protein Accessions	Positions in Master Proteins	# Missed Cleavages	Theo. MH+ [Da]	Abundance: F11: Sample	Quan Info	Found in Sample: [S11] F11: Sample	Confidence (by Search Engine): Sequest HT	Percolator q-Value (by Search Engine): Sequest HT	Percolator PEP (by Search Engine): Sequest HT	XCorr (by Search Engine): Sequest HT	Top Apex RT [min]	Manual validation of PTM assignment	Position(s) in SARS-CoV2 spike
TRUE	High	[H].IGGSGSFTVEKGIYQTSNF.[R]			FALSE	0.00629062	0	1	1	2	QHD43416.1_S2_RBD	QHD43416.1_S2_RBD [127-145]	2	1991.97	3.60054e+06		High	High	0	0.01202	3.51	104.47
TRUE	High	[F].TVEKGIYQTSNF.[R]	1xDeamidated [N11]		FALSE	0.0031198	0	1	1	7	QHD43416.1_S2_RBD	QHD43416.1_S2_RBD [134-145]	1	1387.67	190118024		High	High	0	0.01293	3.71	74.57
TRUE	High	[F].TVEKGIYQTSNF.[R]	1xHexNAc [S/T]	QHD43416.1_S2_RBD 1xHexNAc [T/S]	FALSE	0.00276013	0	1	1	2	QHD43416.1_S2_RBD	QHD43416.1_S2_RBD [134-145]	1	1589.77		No Quan Values	High	High	0	0.007254	2.45		T142	T315
TRUE	High	[F].TVEKGIYQTSNF.[R]			FALSE	0.00476995	0	1	1	6	QHD43416.1_S2_RBD	QHD43416.1_S2_RBD [134-145]	1	1386.69	1985157504		High	High	0	0.07397	3.24	72.06
TRUE	High	[F].TVEKGIYQTSN.[F]			FALSE	0.0956438	0.00936225	1	1	2	QHD43416.1_S2_RBD	QHD43416.1_S2_RBD [134-144]	1	1239.62	13446756		High	High	0.003676	0.1138	3	45.13
TRUE	High	[F].RVQPTESIVRFPNITNLCPF.[G]	1xCarbamidomethyl [C18]; 1xDeamidated [N]		FALSE	0.000854598	0	1	1	105	QHD43416.1_S2_RBD	QHD43416.1_S2_RBD [146-165]	2	2389.23	8.24899e+09		High	High	0	0.001056	3.79	109.16
TRUE	High	[F].RVQPTESIVRFPNITNLCPF.[G]	1xCarbamidomethyl [C18]; 1xHexNAc [T15]	QHD43416.1_S2_RBD 1xHexNAc [T160]	FALSE	0.0219614	0	1	1	2	QHD43416.1_S2_RBD	QHD43416.1_S2_RBD [146-165]	2	2591.33	134865120		High	High	0	0.05006	3.55	108.96	T160	T333
TRUE	High	[F].RVQPTESIVRFPNITNL.[C]	1xDeamidated [N13]; 1xHex(1)HexNAc(1) [S/T]	QHD43416.1_S2_RBD 1xHex(1)HexNAc(1) [T/S]	FALSE	0.011927	0	1	1	4	QHD43416.1_S2_RBD	QHD43416.1_S2_RBD [146-162]	1	2350.21	58631224		High	High	0	0.02879	4.33	108.41	T150	T323
TRUE	High	[F].RVQPTESIVRFPNITNL.[C]	1xDeamidated [N13]; 1xHexNAc [T/S]	QHD43416.1_S2_RBD 1xHexNAc [T/S]	FALSE	0.000356275	0	1	1	6	QHD43416.1_S2_RBD	QHD43416.1_S2_RBD [146-162]	1	2188.16	149519852		High	High	0	0.02537	4.67	108.51	T150	T323
TRUE	High	[F].RVQPTESIVRFPNITNL.[C]	1xHexNAc [T15]	QHD43416.1_S2_RBD 1xHexNAc [T160]	FALSE	0.00220819	0	1	1	6	QHD43416.1_S2_RBD	QHD43416.1_S2_RBD [146-162]	1	2187.18	45957405		High	High	0	0.005859	4.99	108.37	T160	T333
TRUE	High	[F].RVQPTESIVRFPNITNL.[C]	1xDeamidated [N13]		FALSE	0.000828825	0	1	1	5	QHD43416.1_S2_RBD	QHD43416.1_S2_RBD [146-162]	1	1985.08	4.01457e+09		High	High	0	0.002867	5.25	108.66
TRUE	High	[F].RVQPTESIVRFPNITN.[L]	1xDeamidated [N]		FALSE	0.00872523	0	1	1	5	QHD43416.1_S2_RBD	QHD43416.1_S2_RBD [146-161]	1	1872	184619952		High	High	0	0.05179	4.27	95.3
TRUE	High	[F].RVQPTESIVRFPNIT.[N]	1xDeamidated [N13]		FALSE	0.00113567	0	1	1	12	QHD43416.1_S2_RBD	QHD43416.1_S2_RBD [146-160]	1	1757.95	75542246		High	High	0	0.02165	4.37	97.59
TRUE	High	[F].RVQPTESIVRFPN.[I]	1xDeamidated [N13]		FALSE	0.00325931	0	1	1	4	QHD43416.1_S2_RBD	QHD43416.1_S2_RBD [146-158]	1	1543.82	32436072		High	High	0	0.006695	4.65	78.75
TRUE	High	[F].RVQPTESIVR.[F]	1xHexNAc [T5]	QHD43416.1_S2_RBD 1xHexNAc [T150]	FALSE	0.078035	0.00658825	1	1	2	QHD43416.1_S2_RBD	QHD43416.1_S2_RBD [146-155]	0	1387.75	8933398		High	High	0.003676	0.0977	2.96	41.9	T150	T323
TRUE	High	[F].RVQPTESIVR.[F]			FALSE	0.00436976	0	1	1	6	QHD43416.1_S2_RBD	QHD43416.1_S2_RBD [146-155]	0	1184.67	3.44864e+08		High	High	0	0.008693	3.85	43.69
TRUE	High	[F].GEVFNATRFASVY.[A]	1xHexNAc [T/Y]	QHD43416.1_S2_RBD 1xHexNAc [T/Y]	FALSE	0.0143493	0	1	1	3	QHD43416.1_S2_RBD	QHD43416.1_S2_RBD [166-178]	2	1663.8	12327958		High	High	0	0.06869	3.08	105.38	T172	T345
TRUE	High	[F].GEVFNATRF.[A]	1xDeamidated [N5]		FALSE	0.00666146	0	1	1	4	QHD43416.1_S2_RBD	QHD43416.1_S2_RBD [166-174]	1	1041.5	1184294144		High	High	0	0.01289	2.79	86.81
TRUE	High	[F].NATRFASVY.[A]	1xHexNAc [T3]	QHD43416.1_S2_RBD 1xHexNAc [T172]	FALSE	0.108235	0.00936225	1	1	3	QHD43416.1_S2_RBD	QHD43416.1_S2_RBD [170-178]	1	1231.6	3.56306e+06		High	High	0.0009067	0.1819	1.98	64.6	T172	T345
TRUE	High	[F].NATRFASVY.[A]	1xDeamidated [N1]		FALSE	0.0313352	0	1	1	2	QHD43416.1_S2_RBD	QHD43416.1_S2_RBD [170-178]	1	1029.5	14941739		High	High	0.005195	0.2961	2.61	75.85
TRUE	High	[Y].AWNRKRISNCVADY.[S]	1xCarbamidomethyl [C10]		FALSE	0.0590008	0	1	1	3	QHD43416.1_S2_RBD	QHD43416.1_S2_RBD [179-192]	1	1752.86	8.24027e+06		High	High	0	0.1146	3.05	60.64
TRUE	High	[W].NRKRISNCVADYSVLY.[N]	1xCarbamidomethyl [C8]		FALSE	0.00146368	0	1	1	5	QHD43416.1_S2_RBD	QHD43416.1_S2_RBD [181-196]	2	1957.99	33961284		High	High	0	0.00395	3.65	72.98
TRUE	High	[W].NRKRISNCVADYSVL.[Y]	1xCarbamidomethyl [C8]		FALSE	0.00182155	0	1	1	5	QHD43416.1_S2_RBD	QHD43416.1_S2_RBD [181-195]	1	1794.93	45588876		High	High	0	0.004864	4.64	63.01
TRUE	High	[W].NRKRISNCVADY.[S]	1xCarbamidomethyl [C8]; 2xDeamidated [N1; N7]		FALSE	0.00388263	0	1	1	7	QHD43416.1_S2_RBD	QHD43416.1_S2_RBD [181-192]	0	1497.71	2.91966e+07		High	High	0	0.01003	3.51	48.52
TRUE	High	[W].NRKRISNCVADY.[S]	1xCarbamidomethyl [C8]; 1xDeamidated [N]		FALSE	0.00033511	0	1	1	37	QHD43416.1_S2_RBD	QHD43416.1_S2_RBD [181-192]	0	1496.73	832654403		High	High	0	0.00096	5.79	47.75
TRUE	High	[W].NRKRISNCVADY.[S]	1xCarbamidomethyl [C8]		FALSE	0.000299082	0	1	1	54	QHD43416.1_S2_RBD	QHD43416.1_S2_RBD [181-192]	0	1495.74	1.55072e+10		High	High	0	0.003584	5.51	39.49
TRUE	High	[W].NRKRISNCVAD.[Y]	1xCarbamidomethyl [C8]		FALSE	0.0346177	0	1	1	8	QHD43416.1_S2_RBD	QHD43416.1_S2_RBD [181-191]	0	1332.68	3.32514e+07		High	High	0	0.03689	3.21	22.92
TRUE	High	[N].RKRISNCVADY.[S]	1xCarbamidomethyl [C7]		FALSE	0.0629245	0.00340039	1	1	5	QHD43416.1_S2_RBD	QHD43416.1_S2_RBD [182-192]	0	1381.7	2788797696		High	High	0	0.06268	3.19	39.09
TRUE	High	[R].KRISNCVADY.[S]	1xCarbamidomethyl [C6]		FALSE	0.0473233	0	1	1	8	QHD43416.1_S2_RBD	QHD43416.1_S2_RBD [183-192]	0	1225.6	1043621248		High	High	0	0.04883	3.39	46.05
TRUE	High	[R].KRISNCVADY.[S]	1xCarbamidomethyl [C6]; 1xDeamidated [N5]		FALSE	0.0501727	0	1	1	6	QHD43416.1_S2_RBD	QHD43416.1_S2_RBD [183-192]	0	1226.58	49138304		High	High	0	0.05145	3.7	46.62
TRUE	High	[Y].SVLYNSASF.[S]	1xDeamidated [N5]		FALSE	0.0150147	0	1	1	3	QHD43416.1_S2_RBD	QHD43416.1_S2_RBD [193-201]	2	988.462	11189952		High	High	0	0.03561	2.58	98
TRUE	High	[Y].SVLYNSASF.[S]			FALSE	0.00945239	0	1	1	3	QHD43416.1_S2_RBD	QHD43416.1_S2_RBD [193-201]	2	987.478	3.22168e+06		High	High	0	0.02322	2.24	94.8
TRUE	High	[L].YNSASFSTF.[K]			FALSE	0.0976275	0.00936225	1	1	3	QHD43416.1_S2_RBD	QHD43416.1_S2_RBD [196-204]	2	1023.44		No Quan Values	High	High	0.0009067	0.1683	2.24
TRUE	High	[F].KCYGVSPTKL.[N]	1xCarbamidomethyl [C2]		FALSE	0.000695773	0	1	1	6	QHD43416.1_S2_RBD	QHD43416.1_S2_RBD [205-214]	1	1152.61	6.97965e+06		High	High	0	0.0008537	3.7	52.35
TRUE	High	[Y].GVSPTKLNDLCF.[T]	1xCarbamidomethyl [C11]		FALSE	0.0134691	0	1	1	73	QHD43416.1_S2_RBD	QHD43416.1_S2_RBD [208-219]	2	1350.67	7.2796e+09		High	High	0	0.03173	3.19	96.42
TRUE	High	[Y].GVSPTKLNDLCF.[T]	1xCarbamidomethyl [C11]; 1xDeamidated [N8]		FALSE	0.00354179	0	1	1	12	QHD43416.1_S2_RBD	QHD43416.1_S2_RBD [208-219]	2	1351.66	992910372		High	High	0	0.004621	3.93	105.21
TRUE	High	[Y].GVSPTKLNDLC.[F]	1xCarbamidomethyl [C11]		FALSE	0.0629245	0.00340039	1	1	2	QHD43416.1_S2_RBD	QHD43416.1_S2_RBD [208-218]	2	1203.6	81081448		High	High	0	0.08309	3.33	65.75
TRUE	High	[Y].GVSPTKLNDL.[C]			FALSE	0.0135301	0	1	1	7	QHD43416.1_S2_RBD	QHD43416.1_S2_RBD [208-217]	1	1043.57	1681317760		High	High	0	0.01813	2.94	66.55
TRUE	High	[Y].GVSPTKLNDL.[C]	1xDeamidated [N8]		FALSE	0.0139649	0	1	1	2	QHD43416.1_S2_RBD	QHD43416.1_S2_RBD [208-217]	1	1044.56	32217566		High	High	0	0.01875	2.93	72.41
TRUE	High	[V].SPTKLNDL.[C]			FALSE	0.0542616	0	1	1	4	QHD43416.1_S2_RBD	QHD43416.1_S2_RBD [210-217]	1	887.483	86560324		High	High	0	0.07404	3.44	66.56
TRUE	High	[L].NDLCFTNVY.[A]	1xCarbamidomethyl [C4]		FALSE	0.0772517	0.00658825	1	1	2	QHD43416.1_S2_RBD	QHD43416.1_S2_RBD [215-223]	2	1145.49	20934696		High	High	0.005195	0.2874	2.66	107.89
TRUE	High	[L].CFTNVY.[A]	1xCarbamidomethyl [C1]		FALSE	0.104387	0.00936225	1	1	7	QHD43416.1_S2_RBD	QHD43416.1_S2_RBD [218-223]	1	803.339	22910760		High	High	0.0009067	0.1769	1.59	76.55
TRUE	High	[Y].ADSFVIRGDEVRQIAPGQTGKIADYNY.[K]			FALSE	8.42343e-06	0	1	1	8	QHD43416.1_S2_RBD	QHD43416.1_S2_RBD [224-250]	2	2983.49	2.94459e+07		High	High	0	9.784e-06	8.55	101.08
TRUE	High	[Y].ADSFVIRGDEVRQIAPGQTGKIADY.[N]			FALSE	1.48983e-06	0	1	1	11	QHD43416.1_S2_RBD	QHD43416.1_S2_RBD [224-248]	1	2706.38	1149113900		High	High	0	1.995e-05	8.55	96.46
TRUE	High	[Y].ADSFVIRGDEVRQIAPGQTGKIA.[D]			FALSE	0.00541711	0	1	1	2	QHD43416.1_S2_RBD	QHD43416.1_S2_RBD [224-246]	1	2428.29	10794224		High	High	0	0.006218	5.17	86.85
TRUE	High	[Y].ADSFVIRGDEVRQIAPGQTGK.[I]			FALSE	1.66675e-05	0	1	1	8	QHD43416.1_S2_RBD	QHD43416.1_S2_RBD [224-244]	1	2244.17	72584076		High	High	0	1.935e-05	6.98	78.25
TRUE	High	[Y].ADSFVIRGDEVRQIAPGQTG.[K]			FALSE	4.88923e-05	0	1	1	4	QHD43416.1_S2_RBD	QHD43416.1_S2_RBD [224-243]	1	2116.08	22060914		High	High	0	5.674e-05	6.59	86.28
TRUE	High	[Y].ADSFVIRGDEVRQIAPGQT.[G]			FALSE	6.46893e-05	0	1	1	4	QHD43416.1_S2_RBD	QHD43416.1_S2_RBD [224-242]	1	2059.06	10321150		High	High	0	7.504e-05	6.64	86.83
TRUE	High	[Y].ADSFVIRGDEVRQIAPGQ.[T]			FALSE	0.000995996	0	1	1	4	QHD43416.1_S2_RBD	QHD43416.1_S2_RBD [224-241]	1	1958.01	26304147		High	High	0	0.001148	6.66	86.23
TRUE	High	[Y].ADSFVIRGDEVRQ.[I]			FALSE	0.000629173	0	1	1	4	QHD43416.1_S2_RBD	QHD43416.1_S2_RBD [224-236]	1	1491.76	103197372		High	High	0	0.0007264	4.34	64.86
TRUE	High	[Y].ADSFVIRGDEVR.[Q]			FALSE	0.00868656	0	1	1	4	QHD43416.1_S2_RBD	QHD43416.1_S2_RBD [224-235]	1	1363.7	122452172		High	High	0	0.02502	3.91	65.33
TRUE	High	[D].SFVIRGDEVRQIAPGQTGKIADY.[N]			FALSE	8.38666e-06	0	1	1	4	QHD43416.1_S2_RBD	QHD43416.1_S2_RBD [226-248]	1	2520.32	25591396		High	High	0	9.75e-06	8.56	93.46
TRUE	High	[F].VIRGDEVRQIAPGQTGKIADYNY.[K]	1xDeamidated [N22]		FALSE	0.0203032	0	1	1	4	QHD43416.1_S2_RBD	QHD43416.1_S2_RBD [228-250]	1	2564.31	3097957		High	High	0.002538	0.2825	4.56	82.83
TRUE	High	[F].VIRGDEVRQIAPGQTGKIADYNY.[K]			FALSE	6.32062e-07	0	1	1	20	QHD43416.1_S2_RBD	QHD43416.1_S2_RBD [228-250]	1	2563.33	3377063456		High	High	0	6.706e-06	8.89	81.22
TRUE	High	[F].VIRGDEVRQIAPGQTGKIADYN.[Y]	1xDeamidated [N22]		FALSE	0.00355732	0	1	1	6	QHD43416.1_S2_RBD	QHD43416.1_S2_RBD [228-249]	1	2401.25		No Quan Values	High	High	0	0.004105	4.86
TRUE	High	[F].VIRGDEVRQIAPGQTGKIADYN.[Y]			FALSE	0.000330741	0	1	1	19	QHD43416.1_S2_RBD	QHD43416.1_S2_RBD [228-249]	1	2400.26	629623472		High	High	0	0.001394	7.6	75.84
TRUE	High	[F].VIRGDEVRQIAPGQTGKIADY.[N]			FALSE	9.52303e-09	0	1	1	86	QHD43416.1_S2_RBD	QHD43416.1_S2_RBD [228-248]	0	2286.22	5.10983e+10		High	High	0	4.19e-08	9.94	72.87
TRUE	High	[F].VIRGDEVRQIAPGQTGKIAD.[Y]			FALSE	1.05751e-05	0	1	1	8	QHD43416.1_S2_RBD	QHD43416.1_S2_RBD [228-247]	0	2123.16	148636132		High	High	0	1.227e-05	9.6	63.49
TRUE	High	[F].VIRGDEVRQIAPGQTGKIA.[D]			FALSE	1.43013e-05	0	1	1	10	QHD43416.1_S2_RBD	QHD43416.1_S2_RBD [228-246]	0	2008.13	1305785176		High	High	0	1.664e-05	7.38	63.06
TRUE	High	[F].VIRGDEVRQIAPGQTGKI.[A]	1xHex(1)HexNAc(1) [T15]	QHD43416.1_S2_RBD 1xHex(1)HexNAc(1) [T242]	FALSE	0.00556176	0	1	1	15	QHD43416.1_S2_RBD	QHD43416.1_S2_RBD [228-245]	0	2302.22	1.22395e+08		High	High	0	0.006393	3.85	72.72	T242	T415
TRUE	High	[F].VIRGDEVRQIAPGQTGK.[I]			FALSE	4.55871e-05	0	1	1	14	QHD43416.1_S2_RBD	QHD43416.1_S2_RBD [228-244]	0	1824.01	4.16126e+09		High	High	0	0.0001154	6.74	51.41
TRUE	High	[F].VIRGDEVRQIAPGQTG.[K]			FALSE	0.000689712	0	1	1	6	QHD43416.1_S2_RBD	QHD43416.1_S2_RBD [228-243]	0	1695.91	444675784		High	High	0	0.0007964	5.25	58.27
TRUE	High	[F].VIRGDEVRQIAPGQT.[G]			FALSE	0.00229686	0	1	1	4	QHD43416.1_S2_RBD	QHD43416.1_S2_RBD [228-242]	0	1638.89	212507280		High	High	0	0.002649	4.33	58.79
TRUE	High	[F].VIRGDEVRQIAPGQ.[T]			FALSE	0.00115572	0	1	1	8	QHD43416.1_S2_RBD	QHD43416.1_S2_RBD [228-241]	0	1537.84	604199104		High	High	0	0.00183	4.46	57.21
TRUE	High	[F].VIRGDEVRQIAPG.[Q]			FALSE	0.00460561	0	1	1	4	QHD43416.1_S2_RBD	QHD43416.1_S2_RBD [228-240]	0	1409.79	214516856		High	High	0	0.005292	4.32	57.23
TRUE	High	[F].VIRGDEVRQIA.[P]			FALSE	0.0162952	0	1	1	4	QHD43416.1_S2_RBD	QHD43416.1_S2_RBD [228-238]	0	1255.71	23361777		High	High	0.00193	0.09486	4.15	52.8
TRUE	High	[F].VIRGDEVRQI.[A]			FALSE	0.025964	0	1	1	7	QHD43416.1_S2_RBD	QHD43416.1_S2_RBD [228-237]	0	1184.67	22810837		High	High	0.004512	0.1517	3.81	51.47
TRUE	High	[F].VIRGDEVR.[Q]			FALSE	0.0613832	0.00340039	1	1	8	QHD43416.1_S2_RBD	QHD43416.1_S2_RBD [228-235]	0	943.532	1342417178		High	High	0	0.06144	2.28	27.81
TRUE	High	[V].IRGDEVRQIAPGQTGKIADY.[N]			FALSE	1.28759e-05	0	1	1	4	QHD43416.1_S2_RBD	QHD43416.1_S2_RBD [229-248]	0	2187.15	9969909		High	High	0	1.496e-05	9.09	71.68
TRUE	High	[R].GDEVRQIAPGQTGKIADY.[N]			FALSE	0.00231704	0	1	1	2	QHD43416.1_S2_RBD	QHD43416.1_S2_RBD [231-248]	0	1917.97	21822198		High	High	0	0.004937	4.23	72.06
TRUE	High	[D].EVRQIAPGQTGKIADY.[N]			FALSE	0.000995996	0	1	1	4	QHD43416.1_S2_RBD	QHD43416.1_S2_RBD [233-248]	0	1745.92	68738182		High	High	0	0.00115	6.7	65.75
TRUE	High	[V].RQIAPGQTGKIADY.[N]			FALSE	0.00494022	0	1	1	4	QHD43416.1_S2_RBD	QHD43416.1_S2_RBD [235-248]	0	1517.81	44684020		High	High	0	0.009693	5.42	58.03
TRUE	High	[R].QIAPGQTGKIADYNY.[K]			FALSE	0.0239854	0	1	1	3	QHD43416.1_S2_RBD	QHD43416.1_S2_RBD [236-250]	1	1638.81	1.54044e+08		High	High	0	0.02628	3.32	79.01
TRUE	High	[R].QIAPGQTGKIADY.[N]			FALSE	0.00416428	0	1	1	10	QHD43416.1_S2_RBD	QHD43416.1_S2_RBD [236-248]	0	1361.71	2114267601		High	High	0	0.009387	3.48	67.14
TRUE	High	[Q].IAPGQTGKIADYNY.[K]			FALSE	0.0162952	0	1	1	4	QHD43416.1_S2_RBD	QHD43416.1_S2_RBD [237-250]	1	1510.75	99300646		High	High	0	0.028	3.67	73.9
TRUE	High	[Q].IAPGQTGKIADY.[N]			FALSE	0.00618081	0	1	1	4	QHD43416.1_S2_RBD	QHD43416.1_S2_RBD [237-248]	0	1233.65	4145922304		High	High	0	0.01853	2.86	63.19
TRUE	High	[A].PGQTGKIADY.[N]			FALSE	0.0132281	0	1	1	18	QHD43416.1_S2_RBD	QHD43416.1_S2_RBD [239-248]	0	1049.53	438951904		High	High	0	0.03936	4.18	63.18
TRUE	High	[Y].KLPDDFTGCVIAW.[N]	1xCarbamidomethyl [C9]		FALSE	0.00945239	0	1	1	69	QHD43416.1_S2_RBD	QHD43416.1_S2_RBD [251-263]	2	1521.74	9.37408e+09		High	High	0	0.01263	3.61	109.28
TRUE	High	[C].VIAWNSNNLDSKVGGNY.[N]	1xDeamidated [N5]		FALSE	8.37386e-05	0	1	1	6	QHD43416.1_S2_RBD	QHD43416.1_S2_RBD [260-276]	2	1851.89	2.95451e+07		High	High	0	0.00147	5.51	101.52
TRUE	High	[I].AWNSNNLDSKVGGNY.[N]			FALSE	0.000720554	0	1	1	2	QHD43416.1_S2_RBD	QHD43416.1_S2_RBD [262-276]	2	1638.75	7224272		High	High	0	0.0008321	4.18	77.96
TRUE	High	[W].NSNNLDSKVGGNYNY.[L]			FALSE	5.79877e-05	0	1	1	8	QHD43416.1_S2_RBD	QHD43416.1_S2_RBD [264-278]	2	1658.74	588667122		High	High	0	0.0003773	5.35	66.3
TRUE	High	[W].NSNNLDSKVGGNYNY.[L]	1xDeamidated [N]		FALSE	0.000115749	0	1	1	10	QHD43416.1_S2_RBD	QHD43416.1_S2_RBD [264-278]	2	1659.72	109930624		High	High	0	0.003578	4.19	71.14
TRUE	High	[W].NSNNLDSKVGGNYN.[Y]			FALSE	0.00525317	0	1	1	6	QHD43416.1_S2_RBD	QHD43416.1_S2_RBD [264-277]	2	1495.68	4.34314e+08		High	High	0	0.01026	5.3	56.16
TRUE	High	[W].NSNNLDSKVGGNYN.[Y]	1xDeamidated [N]		FALSE	0.0464124	0	1	1	9	QHD43416.1_S2_RBD	QHD43416.1_S2_RBD [264-277]	2	1496.66	4.39153e+07		High	High	0	0.04799	2.33	59.72
TRUE	High	[W].NSNNLDSKVGGNY.[N]	2xDeamidated [N3; N]		FALSE	0.000457171	0	1	1	9	QHD43416.1_S2_RBD	QHD43416.1_S2_RBD [264-276]	1	1383.6	129103455		High	High	0	0.001224	4.56	68.24
TRUE	High	[W].NSNNLDSKVGGNY.[N]	1xDeamidated [N]		FALSE	0.000399193	0	1	1	25	QHD43416.1_S2_RBD	QHD43416.1_S2_RBD [264-276]	1	1382.62	6377803744		High	High	0	0.0009744	4.54	59.15
TRUE	High	[W].NSNNLDSKVGGNY.[N]			FALSE	8.59656e-05	0	1	1	89	QHD43416.1_S2_RBD	QHD43416.1_S2_RBD [264-276]	1	1381.63	1.14663e+10		High	High	0	0.001147	4.39	54.08
TRUE	High	[W].NSNNLDSKVGGN.[Y]			FALSE	0.0103343	0	1	1	2	QHD43416.1_S2_RBD	QHD43416.1_S2_RBD [264-275]	1	1218.57	44417868		High	High	0	0.01434	3.67	35.49
TRUE	High	[W].NSNNLDSKVG.[G]			FALSE	0.0941847	0.00936225	1	1	2	QHD43416.1_S2_RBD	QHD43416.1_S2_RBD [264-273]	1	1047.51	48630956		High	High	0.003676	0.1125	3.13	33.97
TRUE	High	[N].SNNLDSKVGGNYNY.[L]			FALSE	0.0192125	0	1	1	4	QHD43416.1_S2_RBD	QHD43416.1_S2_RBD [265-278]	2	1544.7	152065338		High	High	0	0.07946	3.37	62.78
TRUE	High	[N].SNNLDSKVGGNY.[N]	1xDeamidated [N]		FALSE	0.0127595	0	1	1	7	QHD43416.1_S2_RBD	QHD43416.1_S2_RBD [265-276]	1	1268.58	37544703		High	High	0	0.05289	3.68	59.97
TRUE	High	[N].SNNLDSKVGGNY.[N]			FALSE	0.00511666	0	1	1	10	QHD43416.1_S2_RBD	QHD43416.1_S2_RBD [265-276]	1	1267.59	414656992		High	High	0	0.01399	3.74	53.56
TRUE	High	[S].NNLDSKVGGNY.[N]			FALSE	0.01422	0	1	1	6	QHD43416.1_S2_RBD	QHD43416.1_S2_RBD [266-276]	1	1180.56		No Quan Values	High	High	0	0.02463	3.83
TRUE	High	[N].NLDSKVGGNY.[N]			FALSE	0.011927	0	1	1	4	QHD43416.1_S2_RBD	QHD43416.1_S2_RBD [267-276]	1	1066.52	5.73492e+08		High	High	0	0.0211	3.21	52.8
TRUE	High	[L].DSKVGGNYNYL.[Y]			FALSE	0.0214593	0	1	1	3	QHD43416.1_S2_RBD	QHD43416.1_S2_RBD [269-279]	2	1229.58	4371097		High	High	0	0.04894	2.49	77.09
TRUE	High	[L].DSKVGGNY.[N]			FALSE	0.0776423	0.00658825	1	1	3	QHD43416.1_S2_RBD	QHD43416.1_S2_RBD [269-276]	0	839.389	1025629632		High	High	0	0.142	1.94	33.84
TRUE	High	[L].FRKSNLKPF.[E]			FALSE	0.0390101	0	1	1	3	QHD43416.1_S2_RBD	QHD43416.1_S2_RBD [283-291]	2	1136.66	11454643		High	High	0	0.08181	3.27	47.88
TRUE	High	[F].RKSNLKPFERDISTEIY.[Q]	1xDeamidated [N4]		FALSE	5.24371e-05	0	1	1	2	QHD43416.1_S2_RBD	QHD43416.1_S2_RBD [284-300]	2	2097.1		No Quan Values	High	High	0	0.000162	5.73
TRUE	High	[F].RKSNLKPFERDISTEIY.[Q]			FALSE	5.55056e-05	0	1	1	12	QHD43416.1_S2_RBD	QHD43416.1_S2_RBD [284-300]	2	2096.11	649264368		High	High	0	0.0001714	7.61	71.97
TRUE	High	[F].RKSNLKPF.[E]	1xDeamidated [N4]		FALSE	0.0678035	0.00340039	1	1	4	QHD43416.1_S2_RBD	QHD43416.1_S2_RBD [284-291]	1	990.573	161340176		High	High	0.0009362	0.08257	2.2	39.6
TRUE	High	[R].KSNLKPFERDISTEIY.[Q]			FALSE	0.0150147	0	1	1	4	QHD43416.1_S2_RBD	QHD43416.1_S2_RBD [285-300]	2	1940.01	6378654		High	High	0	0.01688	3.97	81.73
TRUE	High	[K].SNLKPFERDISTEIY.[Q]			FALSE	0.00523016	0	1	1	4	QHD43416.1_S2_RBD	QHD43416.1_S2_RBD [286-300]	2	1811.92	21308542		High	High	0	0.006005	5.22	94.25
TRUE	High	[S].NLKPFERDISTEIY.[Q]			FALSE	0.0800311	0.00658825	1	1	4	QHD43416.1_S2_RBD	QHD43416.1_S2_RBD [287-300]	2	1724.89	69781736		High	High	0	0.07686	3.08	94.17
TRUE	High	[N].LKPFERDISTEIY.[Q]			FALSE	0.0153595	0	1	1	8	QHD43416.1_S2_RBD	QHD43416.1_S2_RBD [288-300]	2	1610.84	90555112		High	High	0	0.01727	4.53	89.5
TRUE	High	[L].KPFERDISTEIY.[Q]			FALSE	0.00138883	0	1	1	17	QHD43416.1_S2_RBD	QHD43416.1_S2_RBD [289-300]	1	1497.76	93998288		High	High	0	0.01927	3.86	74.73
TRUE	High	[F].ERDISTEIY.[Q]			FALSE	0.0232176	0	1	1	39	QHD43416.1_S2_RBD	QHD43416.1_S2_RBD [292-300]	0	1125.54	8666747448		High	High	0.002712	0.2122	3.01	67.35
TRUE	High	[Y].QAGSTPCNGVEGFNCY.[F]	2xCarbamidomethyl [C7; C15]		FALSE	0.000201744	0	1	1	14	QHD43416.1_S2_RBD	QHD43416.1_S2_RBD [301-316]	1	1760.7	1023534258		High	High	0	0.06489	3.51	88.95
TRUE	High	[Y].QAGSTPCNGVEGFNCY.[F]	2xCarbamidomethyl [C7; C15]; 1xDeamidated [N]		FALSE	0.000194806	0	1	1	27	QHD43416.1_S2_RBD	QHD43416.1_S2_RBD [301-316]	1	1761.68	1.99125e+09		High	High	0	0.04065	3.9	91.38
TRUE	High	[Y].QAGSTPCNGVEGFNCY.[F]	2xCarbamidomethyl [C7; C15]; 2xDeamidated [N8; N14]		FALSE	0.00242066	0	1	1	5	QHD43416.1_S2_RBD	QHD43416.1_S2_RBD [301-316]	1	1762.67	17202400		High	High	0.0009362	0.0989	2.86	95.16
TRUE	High	[Y].QAGSTPCNGVEGFN.[C]	1xCarbamidomethyl [C7]		FALSE	0.0341271	0	1	1	4	QHD43416.1_S2_RBD	QHD43416.1_S2_RBD [301-314]	1	1437.61	34363092		High	High	0	0.03644	2.39	68.73
TRUE	High	[Y].QAGSTPCNGVEGF.[N]	1xCarbamidomethyl [C7]; 1xDeamidated [N8]		FALSE	0.0072762	0	1	1	31	QHD43416.1_S2_RBD	QHD43416.1_S2_RBD [301-313]	0	1324.55	1.75568e+09		High	High	0	0.04531	2.82	78.8
TRUE	High	[Y].QAGSTPCNGVEGF.[N]	1xCarbamidomethyl [C7]		FALSE	0.00747175	0	1	1	19	QHD43416.1_S2_RBD	QHD43416.1_S2_RBD [301-313]	0	1323.56	1.14323e+09		High	High	0.0009362	0.08118	2.4	76.29
TRUE	High	[Y].GFQPTNGVGYQPY.[R]	1xDeamidated [N6]		FALSE	0.00258483	0	1	1	21	QHD43416.1_S2_RBD	QHD43416.1_S2_RBD [323-335]	2	1428.64	4111368416		High	High	0	0.006804	2.77	95.43
TRUE	High	[Y].GFQPTNGVGYQPY.[R]			FALSE	0.00339019	0	1	1	20	QHD43416.1_S2_RBD	QHD43416.1_S2_RBD [323-335]	2	1427.66	2145295530		High	High	0	0.008811	2.7	92.82
TRUE	High	[Y].GFQPTNGVGY.[Q]	1xDeamidated [N6]		FALSE	0.0263307	0	1	1	11	QHD43416.1_S2_RBD	QHD43416.1_S2_RBD [323-332]	1	1040.47	820477658		High	High	0.005195	0.2907	2.77	80.74
TRUE	High	[Y].GFQPTNGVGY.[Q]			FALSE	0.0167471	0	1	1	6	QHD43416.1_S2_RBD	QHD43416.1_S2_RBD [323-332]	1	1039.48	620304576		High	High	0	0.03931	2.17	78.43
TRUE	High	[F].QPTNGVGYQPY.[R]	1xDeamidated [N4]		FALSE	0.109931	0.00936225	1	1	6	QHD43416.1_S2_RBD	QHD43416.1_S2_RBD [325-335]	1	1224.55	20362926		High	High	0.002712	0.2035	2.05	75.51
TRUE	High	[F].QPTNGVGY.[Q]			FALSE	0.0604779	0.00340039	1	1	2	QHD43416.1_S2_RBD	QHD43416.1_S2_RBD [325-332]	0	835.394	5131905		High	High	0	0.1171	1.84	50.48
TRUE	High	[F].ELLHAPATVCGPKKSTNL.[V]	1xCarbamidomethyl [C10]		FALSE	9.54821e-05	0	1	1	8	QHD43416.1_S2_RBD	QHD43416.1_S2_RBD [343-360]	2	1936.03	137539110		High	High	0	0.0005721	7.41	63.51
TRUE	High	[F].ELLHAPATVCGPKKSTN.[L]	1xCarbamidomethyl [C10]		FALSE	0.000304362	0	1	1	4	QHD43416.1_S2_RBD	QHD43416.1_S2_RBD [343-359]	2	1822.95	15959904		High	High	0	0.00539	6.18	52.44
TRUE	High	[F].ELLHAPATVCGPKK.[S]	1xCarbamidomethyl [C10]		FALSE	0.0876856	0.00936225	1	1	2	QHD43416.1_S2_RBD	QHD43416.1_S2_RBD [343-356]	2	1520.83	2.28731e+06		High	High	0	0.08303	5	52.58
TRUE	High	[F].ELLHAPATVCGPK.[K]	1xCarbamidomethyl [C10]		FALSE	0.012198	0	1	1	9	QHD43416.1_S2_RBD	QHD43416.1_S2_RBD [343-355]	2	1392.73	100770232		High	High	0	0.1095	4.52	62.73
TRUE	High	[L].LHAPATVCGPKKSTNL.[V]	1xCarbamidomethyl [C8]		FALSE	0.000232059	0	1	1	6	QHD43416.1_S2_RBD	QHD43416.1_S2_RBD [345-360]	1	1693.91	86622904		High	High	0	0.0006771	5.88	49.4
TRUE	High	[L].LHAPATVCGPK.[K]	1xCarbamidomethyl [C8]		FALSE	0.10017	0.00936225	1	1	4	QHD43416.1_S2_RBD	QHD43416.1_S2_RBD [345-355]	1	1150.6	18044408		High	High	0.003676	0.1175	2.53	44.39
TRUE	High	[L].HAPATVCGPKKSTNLVKNKCVNF.[N]	2xCarbamidomethyl [C7; C20]		FALSE	3.19854e-05	0	1	1	5	QHD43416.1_S2_RBD	QHD43416.1_S2_RBD [346-368]	1	2570.33	13206396		High	High	0	0.0001009	6.95	51.73
TRUE	High	[L].HAPATVCGPKKSTNLVKN.[K]	1xCarbamidomethyl [C7]; 1xDeamidated [N14]		FALSE	4.95382e-05	0	1	1	16	QHD43416.1_S2_RBD	QHD43416.1_S2_RBD [346-363]	1	1923.01	9.6554e+07		High	High	0	0.0003117	8.76	36.16
TRUE	High	[L].HAPATVCGPKKSTNLVKN.[K]	1xCarbamidomethyl [C7]		FALSE	7.73977e-05	0	1	1	6	QHD43416.1_S2_RBD	QHD43416.1_S2_RBD [346-363]	1	1922.03	4.49668e+07		High	High	0	8.97e-05	8.67	33.47
TRUE	High	[L].HAPATVCGPKKSTNLVK.[N]	1xCarbamidomethyl [C7]		FALSE	0.00017539	0	1	1	4	QHD43416.1_S2_RBD	QHD43416.1_S2_RBD [346-362]	1	1807.98	35857585		High	High	0	0.0006146	6.99	33.58
TRUE	High	[L].HAPATVCGPKKSTNLVK.[N]	1xCarbamidomethyl [C7]; 1xDeamidated [N14]		FALSE	0.00346516	0	1	1	2	QHD43416.1_S2_RBD	QHD43416.1_S2_RBD [346-362]	1	1808.97	3.31326e+06		High	High	0	0.003999	6.62	36.74
TRUE	High	[L].HAPATVCGPKKSTNL.[V]	1xCarbamidomethyl [C7]; 1xDeamidated [N14]		FALSE	0.00388263	0	1	1	9	QHD43416.1_S2_RBD	QHD43416.1_S2_RBD [346-360]	0	1581.81	2.89571e+06		High	High	0	0.02243	5.27	37.69
TRUE	High	[L].HAPATVCGPKKSTNL.[V]	1xCarbamidomethyl [C7]		FALSE	2.52943e-06	0	1	1	41	QHD43416.1_S2_RBD	QHD43416.1_S2_RBD [346-360]	0	1580.82	12966962675		High	High	0	4.842e-05	5.29	35.02
TRUE	High	[L].HAPATVCGPKKSTNL.[V]	1xCarbamidomethyl [C7]; 1xHexNAc [T5]	QHD43416.1_S2_RBD 1xHexNAc [T350]	FALSE	0.00148952	0	1	1	3	QHD43416.1_S2_RBD	QHD43416.1_S2_RBD [346-360]	0	1783.9	3.92122e+06		High	High	0	0.004023	5.3	37.03	T350	T523
TRUE	High	[L].HAPATVCGPKKSTN.[L]	1xCarbamidomethyl [C7]; 1xDeamidated [N14]		FALSE	0.00118128	0	1	1	4	QHD43416.1_S2_RBD	QHD43416.1_S2_RBD [346-359]	0	1468.72	6.13819e+06		High	High	0	0.002703	5.07	24.55
TRUE	High	[L].HAPATVCGPKKSTN.[L]	1xCarbamidomethyl [C7]		FALSE	0.000176931	0	1	1	28	QHD43416.1_S2_RBD	QHD43416.1_S2_RBD [346-359]	0	1467.74	1.3801e+09		High	High	0	0.00448	5.46	20.71
TRUE	High	[L].HAPATVCGPKKST.[N]	1xCarbamidomethyl [C7]		FALSE	0.00023823	0	1	1	14	QHD43416.1_S2_RBD	QHD43416.1_S2_RBD [346-358]	0	1353.69	173757427		High	High	0	0.001307	5.08	21
TRUE	High	[L].HAPATVCGPKKS.[T]	1xCarbamidomethyl [C7]		FALSE	0.00702362	0	1	1	8	QHD43416.1_S2_RBD	QHD43416.1_S2_RBD [346-357]	0	1252.65	4.68485e+07		High	High	0	0.05808	3.85	19.83
TRUE	High	[L].HAPATVCGPKK.[S]	1xCarbamidomethyl [C7]		FALSE	0.00988316	0	1	1	8	QHD43416.1_S2_RBD	QHD43416.1_S2_RBD [346-356]	0	1165.61	9.67558e+07		High	High	0	0.04959	3.86	19.66
TRUE	High	[L].HAPATVCGPK.[K]	1xCarbamidomethyl [C7]		FALSE	0.00750486	0	1	1	6	QHD43416.1_S2_RBD	QHD43416.1_S2_RBD [346-355]	0	1037.52	3063035392		High	High	0	0.0165	2.99	25.6
TRUE	High	[H].APATVCGPKKSTNL.[V]	1xCarbamidomethyl [C6]		FALSE	0.000776184	0	1	1	12	QHD43416.1_S2_RBD	QHD43416.1_S2_RBD [347-360]	0	1443.76	4.70903e+07		High	High	0	0.03047	4.53	34.52
TRUE	High	[A].PATVCGPKKSTNL.[V]	1xCarbamidomethyl [C5]		FALSE	0.000839774	0	1	1	14	QHD43416.1_S2_RBD	QHD43416.1_S2_RBD [348-360]	0	1372.73	267946400		High	High	0	0.001986	4.22	35.02
TRUE	High	[A].TVCGPKKSTNL.[V]	1xCarbamidomethyl [C3]		FALSE	0.00718041	0	1	1	29	QHD43416.1_S2_RBD	QHD43416.1_S2_RBD [350-360]	0	1204.64	2.64621e+09		High	High	0	0.0541	4.45	31.61
TRUE	High	[T].VCGPKKSTNL.[V]	1xCarbamidomethyl [C2]		FALSE	0.0753301	0.00658825	1	1	13	QHD43416.1_S2_RBD	QHD43416.1_S2_RBD [351-360]	0	1103.59	1.12936e+08		High	High	0.003676	0.1038	3.31	31.61
TRUE	High	[V].CGPKKSTNL.[V]	1xCarbamidomethyl [C1]		FALSE	0.0885837	0.00936225	1	1	10	QHD43416.1_S2_RBD	QHD43416.1_S2_RBD [352-360]	0	1004.52	178923472		High	High	0.004512	0.1626	3.72	31.62
TRUE	High	[C].GPKKSTNLVKNKCVNF.[N]	1xCarbamidomethyl [C13]; 1xDeamidated [N7]		FALSE	0.000154493	0	1	1	2	QHD43416.1_S2_RBD	QHD43416.1_S2_RBD [353-368]	1	1834.98	4.95412e+06		High	High	0	0.0001791	6.72	51.24
TRUE	High	[C].GPKKSTNLVKNKCVNF.[N]	1xCarbamidomethyl [C13]		FALSE	0.000193109	0	1	1	4	QHD43416.1_S2_RBD	QHD43416.1_S2_RBD [353-368]	1	1834	31095814		High	High	0	0.0002233	7.11	44.33
TRUE	High	[K].KSTNLVKNKCVNF.[N]	1xCarbamidomethyl [C10]		FALSE	0.00273609	0	1	1	4	QHD43416.1_S2_RBD	QHD43416.1_S2_RBD [356-368]	1	1551.83	14025592		High	High	0	0.01185	5.13	49.53
TRUE	High	[T].NLVKNKCVNF.[N]	1xCarbamidomethyl [C7]; 1xDeamidated [N5]		FALSE	0.0167471	0	1	1	6	QHD43416.1_S2_RBD	QHD43416.1_S2_RBD [359-368]	1	1236.64	8.50019e+07		High	High	0	0.02804	3.83	64.35
TRUE	High	[T].NLVKNKCVNF.[N]	1xCarbamidomethyl [C7]		FALSE	0.0808449	0.00658825	1	1	8	QHD43416.1_S2_RBD	QHD43416.1_S2_RBD [359-368]	1	1235.66	1.15255e+08		High	High	0	0.0775	3.32	54.29
TRUE	High	[L].VKNKCVNFNF.[-]	1xCarbamidomethyl [C5]; 1xDeamidated [N]		FALSE	0.0208728	0	1	1	12	QHD43416.1_S2_RBD	QHD43416.1_S2_RBD [361-370]	1	1270.62	641894680		High	High	0	0.04774	3.52	66.16
TRUE	High	[L].VKNKCVNFNF.[-]	1xCarbamidomethyl [C5]		FALSE	0.0529467	0	1	1	3	QHD43416.1_S2_RBD	QHD43416.1_S2_RBD [361-370]	1	1269.64		No Quan Values	High	High	0.00437	0.2615	2.36
N-terminal non-spike derived proprietary sequences not shown

## Sheet: PSMs i1 Chy
Checked	Master	Accession	Description	Coverage [%]	Contaminant	# Peptides	# PSMs	# Unique Peptides	# Protein Groups	# AAs	MW [kDa]	calc. pI	Score Sequest HT: Sequest HT	# Peptides (by Search Engine): Sequest HT	# Razor Peptides	Abundance: F11: Sample	Found in Sample: [S11] F11: Sample
TRUE	Master Protein	QHD43416.1_S2_RBD	Surface Glycoprotein (insect expression construct RBD), S OS=SARS-CoV-2 isolate Wuhan-Hu-1 OX=2697049 GN=S PE=1 SV=1	92	FALSE	175	4056	175	1	370	41.2	7.31	13117.6	175	0	2.91448e+11	High
	Checked	Confidence	Annotated Sequence	Modifications	Modifications in Proteins	Contaminant	Qvality PEP	Qvality q-value	# Protein Groups	# Proteins	# PSMs	Master Protein Accessions	Positions in Master Proteins	# Missed Cleavages	Theo. MH+ [Da]	Abundance: F11: Sample	Quan Info	Found in Sample: [S11] F11: Sample	Confidence (by Search Engine): Sequest HT	Percolator q-Value (by Search Engine): Sequest HT	Percolator PEP (by Search Engine): Sequest HT	XCorr (by Search Engine): Sequest HT	Top Apex RT [min]
	TRUE	High	[Y].ADSFVIRGDEVR.[Q]			FALSE	0.00868656	0	1	1	4	QHD43416.1_S2_RBD	QHD43416.1_S2_RBD [224-235]	1	1363.7	122452172		High	High	0	0.02502	3.91	65.33
		Checked	Confidence	Identifying Node	PSM Ambiguity	Annotated Sequence	Modifications	# Protein Groups	# Proteins	Master Protein Accessions	Protein Accessions	# Missed Cleavages	Charge	DeltaScore	DeltaCn	Rank	Search Engine Rank	m/z [Da]	MH+ [Da]	Theo. MH+ [Da]	DeltaM [ppm]	Deltam/z [Da]	Activation Type	MS Order	Isolation Interference [%]	Ion Inject Time [ms]	RT [min]	First Scan	Spectrum File	File ID	Quan Info	XCorr	Contaminant	Percolator q-Value	Percolator PEP	Precursor Abundance	Apex RT [min]
		TRUE	High	Sequest HT (A14)	Ambiguous	[Y].ADSFVIRGDEVR.[Q]		1	1	QHD43416.1_S2_RBD	QHD43416.1_S2_RBD	1	3	0.5882	0	1	1	455.237	1363.7	1363.7	0.46	0.00021	ETD (Electron Transfer Dissociation)	MS2	11.9756	13.83	65.2467	17727	200428_Lumos_(LC1200)_nanoFlex_Ieva_SARS_CoV2_i1_Chy_Chymo_90min_ETD_HCD_2ul.raw	F11		3.91	FALSE	0	0.02502	76269072	65.33
		TRUE	High	Sequest HT (A14)	Ambiguous	[Y].ADSFVIRGDEVR.[Q]		1	1	QHD43416.1_S2_RBD	QHD43416.1_S2_RBD	1	2	0.6361	0	1	1	682.352	1363.7	1363.7	0.36	0.00025	ETD (Electron Transfer Dissociation)	MS2	3.91939	6.807	65.3206	17747	200428_Lumos_(LC1200)_nanoFlex_Ieva_SARS_CoV2_i1_Chy_Chymo_90min_ETD_HCD_2ul.raw	F11		2.94	FALSE	0	0.009923	46183100	65.35
		TRUE	High	Sequest HT (A18)	Ambiguous	[Y].ADSFVIRGDEVR.[Q]		1	1	QHD43416.1_S2_RBD	QHD43416.1_S2_RBD	1	3	0.4821	0	1	1	455.237	1363.7	1363.7	0.46	0.00021	HCD (High Energy Collision Dissociation)	MS2	11.9756	5.159	65.2643	17729	200428_Lumos_(LC1200)_nanoFlex_Ieva_SARS_CoV2_i1_Chy_Chymo_90min_ETD_HCD_2ul.raw	F11		3.07	FALSE	0.004512	0.2107	76269072	65.33
		TRUE	High	Sequest HT (A18)	Ambiguous	[Y].ADSFVIRGDEVR.[Q]		1	1	QHD43416.1_S2_RBD	QHD43416.1_S2_RBD	1	2	0.3408	0	1	1	682.352	1363.7	1363.7	0.36	0.00025	HCD (High Energy Collision Dissociation)	MS2	3.91939	4.068	65.3305	17750	200428_Lumos_(LC1200)_nanoFlex_Ieva_SARS_CoV2_i1_Chy_Chymo_90min_ETD_HCD_2ul.raw	F11		3.11	FALSE	0.004512	0.1921	46183100	65.35
	TRUE	High	[Y].ADSFVIRGDEVRQ.[I]			FALSE	0.000629173	0	1	1	4	QHD43416.1_S2_RBD	QHD43416.1_S2_RBD [224-236]	1	1491.76	103197372		High	High	0	0.0007264	4.34	64.86
		Checked	Confidence	Identifying Node	PSM Ambiguity	Annotated Sequence	Modifications	# Protein Groups	# Proteins	Master Protein Accessions	Protein Accessions	# Missed Cleavages	Charge	DeltaScore	DeltaCn	Rank	Search Engine Rank	m/z [Da]	MH+ [Da]	Theo. MH+ [Da]	DeltaM [ppm]	Deltam/z [Da]	Activation Type	MS Order	Isolation Interference [%]	Ion Inject Time [ms]	RT [min]	First Scan	Spectrum File	File ID	Quan Info	XCorr	Contaminant	Percolator q-Value	Percolator PEP	Precursor Abundance	Apex RT [min]
		TRUE	High	Sequest HT (A14)	Ambiguous	[Y].ADSFVIRGDEVRQ.[I]		1	1	QHD43416.1_S2_RBD	QHD43416.1_S2_RBD	1	3	0.5968	0	1	1	497.923	1491.76	1491.76	0.35	0.00018	ETD (Electron Transfer Dissociation)	MS2	16.5695	26.274	64.7622	17577	200428_Lumos_(LC1200)_nanoFlex_Ieva_SARS_CoV2_i1_Chy_Chymo_90min_ETD_HCD_2ul.raw	F11		4.34	FALSE	0	0.0007264	59012648	64.86
		TRUE	High	Sequest HT (A14)	Ambiguous	[Y].ADSFVIRGDEVRQ.[I]		1	1	QHD43416.1_S2_RBD	QHD43416.1_S2_RBD	1	2	0.6578	0	1	1	746.381	1491.76	1491.76	0.18	0.00013	ETD (Electron Transfer Dissociation)	MS2	16.2258	9.159	64.7885	17585	200428_Lumos_(LC1200)_nanoFlex_Ieva_SARS_CoV2_i1_Chy_Chymo_90min_ETD_HCD_2ul.raw	F11		3.39	FALSE	0	0.007918	44184724	64.88
		TRUE	High	Sequest HT (A18)	Ambiguous	[Y].ADSFVIRGDEVRQ.[I]		1	1	QHD43416.1_S2_RBD	QHD43416.1_S2_RBD	1	3	0.4793	0	1	1	497.923	1491.76	1491.76	0.35	0.00018	HCD (High Energy Collision Dissociation)	MS2	16.5695	5.247	64.7723	17579	200428_Lumos_(LC1200)_nanoFlex_Ieva_SARS_CoV2_i1_Chy_Chymo_90min_ETD_HCD_2ul.raw	F11		3.38	FALSE	0.004512	0.1288	59012648	64.86
		TRUE	High	Sequest HT (A18)	Ambiguous	[Y].ADSFVIRGDEVRQ.[I]		1	1	QHD43416.1_S2_RBD	QHD43416.1_S2_RBD	1	2	0.4406	0	1	1	746.381	1491.76	1491.76	0.18	0.00013	HCD (High Energy Collision Dissociation)	MS2	16.2258	4.029	64.7968	17587	200428_Lumos_(LC1200)_nanoFlex_Ieva_SARS_CoV2_i1_Chy_Chymo_90min_ETD_HCD_2ul.raw	F11		3.45	FALSE	0.003676	0.1121	44184724	64.88
	TRUE	High	[Y].ADSFVIRGDEVRQIAPGQ.[T]			FALSE	0.000995996	0	1	1	4	QHD43416.1_S2_RBD	QHD43416.1_S2_RBD [224-241]	1	1958.01	26304147		High	High	0	0.001148	6.66	86.23
		Checked	Confidence	Identifying Node	PSM Ambiguity	Annotated Sequence	Modifications	# Protein Groups	# Proteins	Master Protein Accessions	Protein Accessions	# Missed Cleavages	Charge	DeltaScore	DeltaCn	Rank	Search Engine Rank	m/z [Da]	MH+ [Da]	Theo. MH+ [Da]	DeltaM [ppm]	Deltam/z [Da]	Activation Type	MS Order	Isolation Interference [%]	Ion Inject Time [ms]	RT [min]	First Scan	Spectrum File	File ID	Quan Info	XCorr	Contaminant	Percolator q-Value	Percolator PEP	Precursor Abundance	Apex RT [min]
		TRUE	High	Sequest HT (A14)	Ambiguous	[Y].ADSFVIRGDEVRQIAPGQ.[T]		1	1	QHD43416.1_S2_RBD	QHD43416.1_S2_RBD	1	3	0.7447	0	1	1	653.341	1958.01	1958.01	0	0	ETD (Electron Transfer Dissociation)	MS2	19.3159	13.9	86.1821	24423	200428_Lumos_(LC1200)_nanoFlex_Ieva_SARS_CoV2_i1_Chy_Chymo_90min_ETD_HCD_2ul.raw	F11		6.66	FALSE	0	0.001148	17635836	86.23
		TRUE	High	Sequest HT (A14)	Ambiguous	[Y].ADSFVIRGDEVRQIAPGQ.[T]		1	1	QHD43416.1_S2_RBD	QHD43416.1_S2_RBD	1	2	0.6444	0	1	1	979.508	1958.01	1958.01	-0.46	-0.00045	ETD (Electron Transfer Dissociation)	MS2	0	13.445	86.2073	24430	200428_Lumos_(LC1200)_nanoFlex_Ieva_SARS_CoV2_i1_Chy_Chymo_90min_ETD_HCD_2ul.raw	F11		3.15	FALSE	0	0.004113	8668311	86.23
		TRUE	High	Sequest HT (A18)	Ambiguous	[Y].ADSFVIRGDEVRQIAPGQ.[T]		1	1	QHD43416.1_S2_RBD	QHD43416.1_S2_RBD	1	3	0.6158	0	1	1	653.341	1958.01	1958.01	0	0	HCD (High Energy Collision Dissociation)	MS2	19.3159	6.047	86.1909	24425	200428_Lumos_(LC1200)_nanoFlex_Ieva_SARS_CoV2_i1_Chy_Chymo_90min_ETD_HCD_2ul.raw	F11		5.18	FALSE	0	0.003542	17635836	86.23
		TRUE	High	Sequest HT (A18)	Ambiguous	[Y].ADSFVIRGDEVRQIAPGQ.[T]		1	1	QHD43416.1_S2_RBD	QHD43416.1_S2_RBD	1	2	0.6122	0	1	1	979.508	1958.01	1958.01	-0.46	-0.00045	HCD (High Energy Collision Dissociation)	MS2	0	5.141	86.2178	24432	200428_Lumos_(LC1200)_nanoFlex_Ieva_SARS_CoV2_i1_Chy_Chymo_90min_ETD_HCD_2ul.raw	F11		3.61	FALSE	0	0.02392	8668311	86.23
	TRUE	High	[Y].ADSFVIRGDEVRQIAPGQT.[G]			FALSE	6.46893e-05	0	1	1	4	QHD43416.1_S2_RBD	QHD43416.1_S2_RBD [224-242]	1	2059.06	10321150		High	High	0	7.504e-05	6.64	86.83
		Checked	Confidence	Identifying Node	PSM Ambiguity	Annotated Sequence	Modifications	# Protein Groups	# Proteins	Master Protein Accessions	Protein Accessions	# Missed Cleavages	Charge	DeltaScore	DeltaCn	Rank	Search Engine Rank	m/z [Da]	MH+ [Da]	Theo. MH+ [Da]	DeltaM [ppm]	Deltam/z [Da]	Activation Type	MS Order	Isolation Interference [%]	Ion Inject Time [ms]	RT [min]	First Scan	Spectrum File	File ID	Quan Info	XCorr	Contaminant	Percolator q-Value	Percolator PEP	Precursor Abundance	Apex RT [min]
		TRUE	High	Sequest HT (A14)	Ambiguous	[Y].ADSFVIRGDEVRQIAPGQT.[G]		1	1	QHD43416.1_S2_RBD	QHD43416.1_S2_RBD	1	3	0.6943	0	1	1	687.025	2059.06	2059.06	1.33	0.00091	ETD (Electron Transfer Dissociation)	MS2	25.7525	16.925	86.7841	24620	200428_Lumos_(LC1200)_nanoFlex_Ieva_SARS_CoV2_i1_Chy_Chymo_90min_ETD_HCD_2ul.raw	F11		6.64	FALSE	0	7.504e-05	10321150	86.83
		TRUE	Low	Sequest HT (A14)	Ambiguous	[Y].ADSFVIRGDEVRQIAPGQT.[G]		1	1	QHD43416.1_S2_RBD	QHD43416.1_S2_RBD	1	2	0.5312	0	1	1	1030.03	2059.05	2059.06	-1.54	-0.00159	ETD (Electron Transfer Dissociation)	MS2	31.8573	21.024	86.8427	24639	200428_Lumos_(LC1200)_nanoFlex_Ieva_SARS_CoV2_i1_Chy_Chymo_90min_ETD_HCD_2ul.raw	F11		1.6	FALSE	0.07649	0.5187
		TRUE	High	Sequest HT (A18)	Ambiguous	[Y].ADSFVIRGDEVRQIAPGQT.[G]		1	1	QHD43416.1_S2_RBD	QHD43416.1_S2_RBD	1	3	0.5584	0	1	1	687.025	2059.06	2059.06	1.33	0.00091	HCD (High Energy Collision Dissociation)	MS2	25.7525	10.1	86.7956	24623	200428_Lumos_(LC1200)_nanoFlex_Ieva_SARS_CoV2_i1_Chy_Chymo_90min_ETD_HCD_2ul.raw	F11		4.37	FALSE	0.003676	0.1213	10321150	86.83
		TRUE	High	Sequest HT (A18)	Ambiguous	[Y].ADSFVIRGDEVRQIAPGQT.[G]		1	1	QHD43416.1_S2_RBD	QHD43416.1_S2_RBD	1	2	0.6276	0	1	1	1030.03	2059.05	2059.06	-1.54	-0.00159	HCD (High Energy Collision Dissociation)	MS2	31.8573	13.377	86.8508	24641	200428_Lumos_(LC1200)_nanoFlex_Ieva_SARS_CoV2_i1_Chy_Chymo_90min_ETD_HCD_2ul.raw	F11		2.9	FALSE	0	0.03702
	TRUE	High	[Y].ADSFVIRGDEVRQIAPGQTG.[K]			FALSE	4.88923e-05	0	1	1	4	QHD43416.1_S2_RBD	QHD43416.1_S2_RBD [224-243]	1	2116.08	22060914		High	High	0	5.674e-05	6.59	86.28
		Checked	Confidence	Identifying Node	PSM Ambiguity	Annotated Sequence	Modifications	# Protein Groups	# Proteins	Master Protein Accessions	Protein Accessions	# Missed Cleavages	Charge	DeltaScore	DeltaCn	Rank	Search Engine Rank	m/z [Da]	MH+ [Da]	Theo. MH+ [Da]	DeltaM [ppm]	Deltam/z [Da]	Activation Type	MS Order	Isolation Interference [%]	Ion Inject Time [ms]	RT [min]	First Scan	Spectrum File	File ID	Quan Info	XCorr	Contaminant	Percolator q-Value	Percolator PEP	Precursor Abundance	Apex RT [min]
		TRUE	High	Sequest HT (A14)	Ambiguous	[Y].ADSFVIRGDEVRQIAPGQTG.[K]		1	1	QHD43416.1_S2_RBD	QHD43416.1_S2_RBD	1	3	0.6844	0	1	1	706.031	2116.08	2116.08	-0.11	-8e-05	ETD (Electron Transfer Dissociation)	MS2	30.8823	10.263	86.2117	24431	200428_Lumos_(LC1200)_nanoFlex_Ieva_SARS_CoV2_i1_Chy_Chymo_90min_ETD_HCD_2ul.raw	F11		6.59	FALSE	0	5.674e-05	16311398	86.28
		TRUE	Medium	Sequest HT (A14)	Ambiguous	[Y].ADSFVIRGDEVRQIAPGQTG.[K]		1	1	QHD43416.1_S2_RBD	QHD43416.1_S2_RBD	1	2	0.3047	0	1	1	1058.54	2116.08	2116.08	0.01	1e-05	ETD (Electron Transfer Dissociation)	MS2	23.2227	16.29	86.266	24446	200428_Lumos_(LC1200)_nanoFlex_Ieva_SARS_CoV2_i1_Chy_Chymo_90min_ETD_HCD_2ul.raw	F11		1.28	FALSE	0.02174	0.3297	5749516	86.29
		TRUE	High	Sequest HT (A18)	Ambiguous	[Y].ADSFVIRGDEVRQIAPGQTG.[K]		1	1	QHD43416.1_S2_RBD	QHD43416.1_S2_RBD	1	3	0.6151	0	1	1	706.031	2116.08	2116.08	-0.11	-8e-05	HCD (High Energy Collision Dissociation)	MS2	30.8823	7.381	86.2242	24433	200428_Lumos_(LC1200)_nanoFlex_Ieva_SARS_CoV2_i1_Chy_Chymo_90min_ETD_HCD_2ul.raw	F11		4.78	FALSE	0	0.04871	16311398	86.28
		TRUE	High	Sequest HT (A18)	Ambiguous	[Y].ADSFVIRGDEVRQIAPGQTG.[K]		1	1	QHD43416.1_S2_RBD	QHD43416.1_S2_RBD	1	2	0.6111	0	1	1	1058.54	2116.08	2116.08	0.01	1e-05	HCD (High Energy Collision Dissociation)	MS2	23.2227	9.955	86.2737	24448	200428_Lumos_(LC1200)_nanoFlex_Ieva_SARS_CoV2_i1_Chy_Chymo_90min_ETD_HCD_2ul.raw	F11		3.24	FALSE	0	0.007719	5749516	86.29
	TRUE	High	[Y].ADSFVIRGDEVRQIAPGQTGK.[I]			FALSE	1.66675e-05	0	1	1	8	QHD43416.1_S2_RBD	QHD43416.1_S2_RBD [224-244]	1	2244.17	72584076		High	High	0	1.935e-05	6.98	78.25
		Checked	Confidence	Identifying Node	PSM Ambiguity	Annotated Sequence	Modifications	# Protein Groups	# Proteins	Master Protein Accessions	Protein Accessions	# Missed Cleavages	Charge	DeltaScore	DeltaCn	Rank	Search Engine Rank	m/z [Da]	MH+ [Da]	Theo. MH+ [Da]	DeltaM [ppm]	Deltam/z [Da]	Activation Type	MS Order	Isolation Interference [%]	Ion Inject Time [ms]	RT [min]	First Scan	Spectrum File	File ID	Quan Info	XCorr	Contaminant	Percolator q-Value	Percolator PEP	Precursor Abundance	Apex RT [min]
		TRUE	High	Sequest HT (A14)	Ambiguous	[Y].ADSFVIRGDEVRQIAPGQTGK.[I]		1	1	QHD43416.1_S2_RBD	QHD43416.1_S2_RBD	1	3	0.6066	0	1	1	748.729	2244.17	2244.17	-0.29	-0.00022	ETD (Electron Transfer Dissociation)	MS2	19.9847	10.103	78.0417	21776	200428_Lumos_(LC1200)_nanoFlex_Ieva_SARS_CoV2_i1_Chy_Chymo_90min_ETD_HCD_2ul.raw	F11		6.33	FALSE	0	0.002336	40254440	78.25
		TRUE	High	Sequest HT (A14)	Ambiguous	[Y].ADSFVIRGDEVRQIAPGQTGK.[I]		1	1	QHD43416.1_S2_RBD	QHD43416.1_S2_RBD	1	4	0.6662	0	1	1	561.799	2244.17	2244.17	-0.38	-0.00021	ETD (Electron Transfer Dissociation)	MS2	43.3738	11.364	78.0507	21779	200428_Lumos_(LC1200)_nanoFlex_Ieva_SARS_CoV2_i1_Chy_Chymo_90min_ETD_HCD_2ul.raw	F11		6.98	FALSE	0	1.935e-05	32329636	78.22
		TRUE	High	Sequest HT (A14)	Ambiguous	[Y].ADSFVIRGDEVRQIAPGQTGK.[I]		1	1	QHD43416.1_S2_RBD	QHD43416.1_S2_RBD	1	3	0.6856	0	1	1	748.73	2244.17	2244.17	0.44	0.00033	ETD (Electron Transfer Dissociation)	MS2	16.7914	7.575	78.4353	21907	200428_Lumos_(LC1200)_nanoFlex_Ieva_SARS_CoV2_i1_Chy_Chymo_90min_ETD_HCD_2ul.raw	F11		4.93	FALSE	0	0.02004	40254440	78.25
		TRUE	Low	Sequest HT (A14)	Ambiguous	[Y].ADSFVIRGDEVRQIAPGQTGK.[I]		1	1	QHD43416.1_S2_RBD	QHD43416.1_S2_RBD	1	3	0.4188	0	1	1	748.729	2244.17	2244.17	0.28	0.00021	ETD (Electron Transfer Dissociation)	MS2	51.4225	18.301	79.3279	22194	200428_Lumos_(LC1200)_nanoFlex_Ieva_SARS_CoV2_i1_Chy_Chymo_90min_ETD_HCD_2ul.raw	F11		1.6	FALSE	0.5075	0.9199
		TRUE	High	Sequest HT (A18)	Ambiguous	[Y].ADSFVIRGDEVRQIAPGQTGK.[I]		1	1	QHD43416.1_S2_RBD	QHD43416.1_S2_RBD	1	3	0.6684	0	1	1	748.729	2244.17	2244.17	-0.29	-0.00022	HCD (High Energy Collision Dissociation)	MS2	19.9847	5.15	78.0494	21778	200428_Lumos_(LC1200)_nanoFlex_Ieva_SARS_CoV2_i1_Chy_Chymo_90min_ETD_HCD_2ul.raw	F11		5.94	FALSE	0	0.004906	40254440	78.25
		TRUE	High	Sequest HT (A18)	Ambiguous	[Y].ADSFVIRGDEVRQIAPGQTGK.[I]		1	1	QHD43416.1_S2_RBD	QHD43416.1_S2_RBD	1	4	0.3815	0	1	1	561.799	2244.17	2244.17	-0.38	-0.00021	HCD (High Energy Collision Dissociation)	MS2	43.3738	5.204	78.0604	21781	200428_Lumos_(LC1200)_nanoFlex_Ieva_SARS_CoV2_i1_Chy_Chymo_90min_ETD_HCD_2ul.raw	F11		4.43	FALSE	0.003676	0.1214	32329636	78.22
		TRUE	High	Sequest HT (A18)	Ambiguous	[Y].ADSFVIRGDEVRQIAPGQTGK.[I]		1	1	QHD43416.1_S2_RBD	QHD43416.1_S2_RBD	1	3	0.6237	0	1	1	748.73	2244.17	2244.17	0.44	0.00033	HCD (High Energy Collision Dissociation)	MS2	16.7914	6.064	78.4483	21909	200428_Lumos_(LC1200)_nanoFlex_Ieva_SARS_CoV2_i1_Chy_Chymo_90min_ETD_HCD_2ul.raw	F11		4.81	FALSE	0	0.00921	40254440	78.25
		TRUE	High	Sequest HT (A18)	Ambiguous	[Y].ADSFVIRGDEVRQIAPGQTGK.[I]		1	1	QHD43416.1_S2_RBD	QHD43416.1_S2_RBD	1	3	0.5664	0	1	1	748.729	2244.17	2244.17	0.28	0.00021	HCD (High Energy Collision Dissociation)	MS2	51.4225	13.895	79.3383	22197	200428_Lumos_(LC1200)_nanoFlex_Ieva_SARS_CoV2_i1_Chy_Chymo_90min_ETD_HCD_2ul.raw	F11		3.99	FALSE	0.004512	0.1356
	TRUE	High	[Y].ADSFVIRGDEVRQIAPGQTGKIA.[D]			FALSE	0.00541711	0	1	1	2	QHD43416.1_S2_RBD	QHD43416.1_S2_RBD [224-246]	1	2428.29	10794224		High	High	0	0.006218	5.17	86.85
		Checked	Confidence	Identifying Node	PSM Ambiguity	Annotated Sequence	Modifications	# Protein Groups	# Proteins	Master Protein Accessions	Protein Accessions	# Missed Cleavages	Charge	DeltaScore	DeltaCn	Rank	Search Engine Rank	m/z [Da]	MH+ [Da]	Theo. MH+ [Da]	DeltaM [ppm]	Deltam/z [Da]	Activation Type	MS Order	Isolation Interference [%]	Ion Inject Time [ms]	RT [min]	First Scan	Spectrum File	File ID	Quan Info	XCorr	Contaminant	Percolator q-Value	Percolator PEP	Precursor Abundance	Apex RT [min]
		TRUE	High	Sequest HT (A14)	Ambiguous	[Y].ADSFVIRGDEVRQIAPGQTGKIA.[D]		1	1	QHD43416.1_S2_RBD	QHD43416.1_S2_RBD	1	3	0.6789	0	1	1	810.104	2428.3	2428.29	1.38	0.00112	ETD (Electron Transfer Dissociation)	MS2	50.155	13.799	86.8096	24629	200428_Lumos_(LC1200)_nanoFlex_Ieva_SARS_CoV2_i1_Chy_Chymo_90min_ETD_HCD_2ul.raw	F11		5.17	FALSE	0	0.006218	10794224	86.85
		TRUE	High	Sequest HT (A18)	Ambiguous	[Y].ADSFVIRGDEVRQIAPGQTGKIA.[D]		1	1	QHD43416.1_S2_RBD	QHD43416.1_S2_RBD	1	3	0.5051	0	1	1	810.104	2428.3	2428.29	1.38	0.00112	HCD (High Energy Collision Dissociation)	MS2	50.155	8.491	86.8175	24631	200428_Lumos_(LC1200)_nanoFlex_Ieva_SARS_CoV2_i1_Chy_Chymo_90min_ETD_HCD_2ul.raw	F11		3.92	FALSE	0	0.03543	10794224	86.85
	TRUE	High	[Y].ADSFVIRGDEVRQIAPGQTGKIADY.[N]			FALSE	1.48983e-06	0	1	1	11	QHD43416.1_S2_RBD	QHD43416.1_S2_RBD [224-248]	1	2706.38	1149113900		High	High	0	1.995e-05	8.55	96.46
		Checked	Confidence	Identifying Node	PSM Ambiguity	Annotated Sequence	Modifications	# Protein Groups	# Proteins	Master Protein Accessions	Protein Accessions	# Missed Cleavages	Charge	DeltaScore	DeltaCn	Rank	Search Engine Rank	m/z [Da]	MH+ [Da]	Theo. MH+ [Da]	DeltaM [ppm]	Deltam/z [Da]	Activation Type	MS Order	Isolation Interference [%]	Ion Inject Time [ms]	RT [min]	First Scan	Spectrum File	File ID	Quan Info	XCorr	Contaminant	Percolator q-Value	Percolator PEP	Precursor Abundance	Apex RT [min]
		TRUE	High	Sequest HT (A2)	Unambiguous	[Y].ADSFVIRGDEVRQIAPGQTGKIADY.[N]		1	1	QHD43416.1_S2_RBD	QHD43416.1_S2_RBD	1	3	0.7977	0	1	1	902.8	2706.39	2706.38	0.18	0.00016	ETD (Electron Transfer Dissociation)	MS2	6.49982	4.132	96.3097	27731	200428_Lumos_(LC1200)_nanoFlex_Ieva_SARS_CoV2_i1_Chy_Chymo_90min_ETD_HCD_2ul.raw	F11		8.55	FALSE	0	1.995e-05	890256256	96.46
		TRUE	High	Sequest HT (A2)	Unambiguous	[Y].ADSFVIRGDEVRQIAPGQTGKIADY.[N]		1	1	QHD43416.1_S2_RBD	QHD43416.1_S2_RBD	1	3	0.7589	0	1	1	902.8	2706.39	2706.38	0.18	0.00016	ETD (Electron Transfer Dissociation)	MS2	0	1.84	96.6669	27834	200428_Lumos_(LC1200)_nanoFlex_Ieva_SARS_CoV2_i1_Chy_Chymo_90min_ETD_HCD_2ul.raw	F11		7.05	FALSE	0	1.023e-05	890256256	96.46
		TRUE	High	Sequest HT (A2)	Unambiguous	[Y].ADSFVIRGDEVRQIAPGQTGKIADY.[N]		1	1	QHD43416.1_S2_RBD	QHD43416.1_S2_RBD	1	3	0.7494	0	1	1	902.8	2706.39	2706.38	0.51	0.00046	ETD (Electron Transfer Dissociation)	MS2	0	7.167	97.7047	28131	200428_Lumos_(LC1200)_nanoFlex_Ieva_SARS_CoV2_i1_Chy_Chymo_90min_ETD_HCD_2ul.raw	F11		7.9	FALSE	0	5.319e-06	117032824	97.82
		TRUE	Medium	Sequest HT (A2)	Ambiguous	[Y].ADSFVIRGDEVRQIAPGQTGKIADY.[N]		1	1	QHD43416.1_S2_RBD	QHD43416.1_S2_RBD	1	3	0.6341	0	1	1	902.8	2706.38	2706.38	0.11	0.0001	ETD (Electron Transfer Dissociation)	MS2	41.5964	11.26	98.0927	28250	200428_Lumos_(LC1200)_nanoFlex_Ieva_SARS_CoV2_i1_Chy_Chymo_90min_ETD_HCD_2ul.raw	F11		2.87	FALSE	0.02216	0.5341	51050276	98.23
		TRUE	Medium	Sequest HT (A14)	Ambiguous	[Y].ADSFVIRGDEVRQIAPGQTGKIADY.[N]		1	1	QHD43416.1_S2_RBD	QHD43416.1_S2_RBD	1	3	0.5923	0	1	1	902.8	2706.38	2706.38	0.11	0.0001	ETD (Electron Transfer Dissociation)	MS2	41.5964	11.26	98.0927	28250	200428_Lumos_(LC1200)_nanoFlex_Ieva_SARS_CoV2_i1_Chy_Chymo_90min_ETD_HCD_2ul.raw	F11		2.87	FALSE	0.03398	0.3981	51050276	98.23
		TRUE	High	Sequest HT (A16)	Unambiguous	[Y].ADSFVIRGDEVRQIAPGQTGKIADY.[N]		1	1	QHD43416.1_S2_RBD	QHD43416.1_S2_RBD	1	3	0.7026	0	1	1	902.8	2706.39	2706.38	0.18	0.00016	HCD (High Energy Collision Dissociation)	MS2	6.49982	1.842	96.3214	27733	200428_Lumos_(LC1200)_nanoFlex_Ieva_SARS_CoV2_i1_Chy_Chymo_90min_ETD_HCD_2ul.raw	F11		5.48	FALSE	0	0.004292	890256256	96.46
		TRUE	Low	Sequest HT (A16)	Ambiguous	[Y].ADSFVIRGDEVRQIAPGQTGKIADY.[N]		1	1	QHD43416.1_S2_RBD	QHD43416.1_S2_RBD	1	2	0.6201	0	1	1	1353.69	2706.36	2706.38	-7.67	-0.01038	HCD (High Energy Collision Dissociation)	MS2	53.4933	2.605	96.4319	27768	200428_Lumos_(LC1200)_nanoFlex_Ieva_SARS_CoV2_i1_Chy_Chymo_90min_ETD_HCD_2ul.raw	F11		3.29	FALSE	0.6811	1	90774544	96.49
		TRUE	High	Sequest HT (A16)	Unambiguous	[Y].ADSFVIRGDEVRQIAPGQTGKIADY.[N]		1	1	QHD43416.1_S2_RBD	QHD43416.1_S2_RBD	1	3	0.6673	0	1	1	902.8	2706.39	2706.38	0.18	0.00016	HCD (High Energy Collision Dissociation)	MS2	0	1.209	96.6779	27835	200428_Lumos_(LC1200)_nanoFlex_Ieva_SARS_CoV2_i1_Chy_Chymo_90min_ETD_HCD_2ul.raw	F11		5.53	FALSE	0	0.01042	890256256	96.46
		TRUE	High	Sequest HT (A16)	Unambiguous	[Y].ADSFVIRGDEVRQIAPGQTGKIADY.[N]		1	1	QHD43416.1_S2_RBD	QHD43416.1_S2_RBD	1	3	0.7036	0	1	1	902.8	2706.39	2706.38	0.51	0.00046	HCD (High Energy Collision Dissociation)	MS2	0	3.424	97.7165	28133	200428_Lumos_(LC1200)_nanoFlex_Ieva_SARS_CoV2_i1_Chy_Chymo_90min_ETD_HCD_2ul.raw	F11		5.6	FALSE	0	0.0008814	117032824	97.82
		TRUE	High	Sequest HT (A16)	Unambiguous	[Y].ADSFVIRGDEVRQIAPGQTGKIADY.[N]		1	1	QHD43416.1_S2_RBD	QHD43416.1_S2_RBD	1	3	0.3541	0	1	1	902.8	2706.38	2706.38	0.11	0.0001	HCD (High Energy Collision Dissociation)	MS2	41.5964	8.366	98.1035	28253	200428_Lumos_(LC1200)_nanoFlex_Ieva_SARS_CoV2_i1_Chy_Chymo_90min_ETD_HCD_2ul.raw	F11		2.57	FALSE	0.005195	0.2878	51050276	98.23
		TRUE	High	Sequest HT (A18)	Ambiguous	[Y].ADSFVIRGDEVRQIAPGQTGKIADY.[N]		1	1	QHD43416.1_S2_RBD	QHD43416.1_S2_RBD	1	2	0.5745	0	1	1	1353.69	2706.36	2706.38	-7.67	-0.01038	HCD (High Energy Collision Dissociation)	MS2	53.4933	2.605	96.4319	27768	200428_Lumos_(LC1200)_nanoFlex_Ieva_SARS_CoV2_i1_Chy_Chymo_90min_ETD_HCD_2ul.raw	F11		3.29	FALSE	0	0.009649	90774544	96.49
	TRUE	High	[Y].ADSFVIRGDEVRQIAPGQTGKIADYNY.[K]			FALSE	8.42343e-06	0	1	1	8	QHD43416.1_S2_RBD	QHD43416.1_S2_RBD [224-250]	2	2983.49	2.94459e+07		High	High	0	9.784e-06	8.55	101.08
		Checked	Confidence	Identifying Node	PSM Ambiguity	Annotated Sequence	Modifications	# Protein Groups	# Proteins	Master Protein Accessions	Protein Accessions	# Missed Cleavages	Charge	DeltaScore	DeltaCn	Rank	Search Engine Rank	m/z [Da]	MH+ [Da]	Theo. MH+ [Da]	DeltaM [ppm]	Deltam/z [Da]	Activation Type	MS Order	Isolation Interference [%]	Ion Inject Time [ms]	RT [min]	First Scan	Spectrum File	File ID	Quan Info	XCorr	Contaminant	Percolator q-Value	Percolator PEP	Precursor Abundance	Apex RT [min]
		TRUE	High	Sequest HT (A14)	Ambiguous	[Y].ADSFVIRGDEVRQIAPGQTGKIADYNY.[K]		1	1	QHD43416.1_S2_RBD	QHD43416.1_S2_RBD	2	4	0.7789	0	1	1	746.629	2983.49	2983.49	0.83	0.00062	ETD (Electron Transfer Dissociation)	MS2	23.8954	15.595	101.004	29194	200428_Lumos_(LC1200)_nanoFlex_Ieva_SARS_CoV2_i1_Chy_Chymo_90min_ETD_HCD_2ul.raw	F11		8.55	FALSE	0	9.784e-06	14261166	101.08
		TRUE	High	Sequest HT (A14)	Ambiguous	[Y].ADSFVIRGDEVRQIAPGQTGKIADYNY.[K]		1	1	QHD43416.1_S2_RBD	QHD43416.1_S2_RBD	2	3	0.7337	0	1	1	995.169	2983.49	2983.49	0.98	0.00097	ETD (Electron Transfer Dissociation)	MS2	32.1629	13.57	101.006	29195	200428_Lumos_(LC1200)_nanoFlex_Ieva_SARS_CoV2_i1_Chy_Chymo_90min_ETD_HCD_2ul.raw	F11		5.82	FALSE	0	0.002774	9580392	101.08
		TRUE	High	Sequest HT (A14)	Ambiguous	[Y].ADSFVIRGDEVRQIAPGQTGKIADYNY.[K]		1	1	QHD43416.1_S2_RBD	QHD43416.1_S2_RBD	2	3	0.769	0	1	1	995.17	2983.5	2983.49	1.84	0.00183	ETD (Electron Transfer Dissociation)	MS2	0	17.12	102.134	29558	200428_Lumos_(LC1200)_nanoFlex_Ieva_SARS_CoV2_i1_Chy_Chymo_90min_ETD_HCD_2ul.raw	F11		5.54	FALSE	0	0.001523	2.26985e+06	102.11
		TRUE	High	Sequest HT (A14)	Ambiguous	[Y].ADSFVIRGDEVRQIAPGQTGKIADYNY.[K]		1	1	QHD43416.1_S2_RBD	QHD43416.1_S2_RBD	2	4	0.7349	0	1	1	746.628	2983.49	2983.49	-0.07	-5e-05	ETD (Electron Transfer Dissociation)	MS2	17.8845	17.42	102.161	29568	200428_Lumos_(LC1200)_nanoFlex_Ieva_SARS_CoV2_i1_Chy_Chymo_90min_ETD_HCD_2ul.raw	F11		6.94	FALSE	0	0.0002667	3.33447e+06	102.14
		TRUE	High	Sequest HT (A18)	Ambiguous	[Y].ADSFVIRGDEVRQIAPGQTGKIADYNY.[K]		1	1	QHD43416.1_S2_RBD	QHD43416.1_S2_RBD	2	4	0.5496	0	1	1	746.629	2983.49	2983.49	0.83	0.00062	HCD (High Energy Collision Dissociation)	MS2	23.8954	9.585	101.013	29196	200428_Lumos_(LC1200)_nanoFlex_Ieva_SARS_CoV2_i1_Chy_Chymo_90min_ETD_HCD_2ul.raw	F11		5.64	FALSE	0	0.04771	14261166	101.08
		TRUE	High	Sequest HT (A18)	Ambiguous	[Y].ADSFVIRGDEVRQIAPGQTGKIADYNY.[K]		1	1	QHD43416.1_S2_RBD	QHD43416.1_S2_RBD	2	3	0.6579	0	1	1	995.169	2983.49	2983.49	0.98	0.00097	HCD (High Energy Collision Dissociation)	MS2	32.1629	9.535	101.015	29197	200428_Lumos_(LC1200)_nanoFlex_Ieva_SARS_CoV2_i1_Chy_Chymo_90min_ETD_HCD_2ul.raw	F11		5.73	FALSE	0	0.002332	9580392	101.08
		TRUE	High	Sequest HT (A18)	Ambiguous	[Y].ADSFVIRGDEVRQIAPGQTGKIADYNY.[K]		1	1	QHD43416.1_S2_RBD	QHD43416.1_S2_RBD	2	3	0.5775	0	1	1	995.17	2983.5	2983.49	1.84	0.00183	HCD (High Energy Collision Dissociation)	MS2	0	13.384	102.144	29561	200428_Lumos_(LC1200)_nanoFlex_Ieva_SARS_CoV2_i1_Chy_Chymo_90min_ETD_HCD_2ul.raw	F11		4.45	FALSE	0	0.02948	2.26985e+06	102.11
		TRUE	High	Sequest HT (A18)	Ambiguous	[Y].ADSFVIRGDEVRQIAPGQTGKIADYNY.[K]		1	1	QHD43416.1_S2_RBD	QHD43416.1_S2_RBD	2	4	0.539	0	1	1	746.628	2983.49	2983.49	-0.07	-5e-05	HCD (High Energy Collision Dissociation)	MS2	17.8845	9.197	102.171	29570	200428_Lumos_(LC1200)_nanoFlex_Ieva_SARS_CoV2_i1_Chy_Chymo_90min_ETD_HCD_2ul.raw	F11		4.1	FALSE	0.007192	0.3139	3.33447e+06	102.14
	TRUE	High	[H].APATVCGPKKSTNL.[V]	1xCarbamidomethyl [C6]		FALSE	0.000776184	0	1	1	12	QHD43416.1_S2_RBD	QHD43416.1_S2_RBD [347-360]	0	1443.76	4.70903e+07		High	High	0	0.03047	4.53	34.52
		Checked	Confidence	Identifying Node	PSM Ambiguity	Annotated Sequence	Modifications	# Protein Groups	# Proteins	Master Protein Accessions	Protein Accessions	# Missed Cleavages	Charge	DeltaScore	DeltaCn	Rank	Search Engine Rank	m/z [Da]	MH+ [Da]	Theo. MH+ [Da]	DeltaM [ppm]	Deltam/z [Da]	Activation Type	MS Order	Isolation Interference [%]	Ion Inject Time [ms]	RT [min]	First Scan	Spectrum File	File ID	Quan Info	XCorr	Contaminant	Percolator q-Value	Percolator PEP	Precursor Abundance	Apex RT [min]
		TRUE	High	Sequest HT (A14)	Ambiguous	[H].APATVcGPKKSTNL.[V]	C6(Carbamidomethyl)	1	1	QHD43416.1_S2_RBD	QHD43416.1_S2_RBD	0	2	0.5641	0	1	1	722.385	1443.76	1443.76	-0.46	-0.00033	ETD (Electron Transfer Dissociation)	MS2	0	29.484	34.3782	8759	200428_Lumos_(LC1200)_nanoFlex_Ieva_SARS_CoV2_i1_Chy_Chymo_90min_ETD_HCD_2ul.raw	F11		2.73	FALSE	0	0.05966	43369936	34.52
		TRUE	High	Sequest HT (A14)	Ambiguous	[H].APATVcGPKKSTNL.[V]	C6(Carbamidomethyl)	1	1	QHD43416.1_S2_RBD	QHD43416.1_S2_RBD	0	2	0.5698	0	1	1	722.385	1443.76	1443.76	0.47	0.00034	ETD (Electron Transfer Dissociation)	MS2	20.284	31.431	34.7459	8849	200428_Lumos_(LC1200)_nanoFlex_Ieva_SARS_CoV2_i1_Chy_Chymo_90min_ETD_HCD_2ul.raw	F11		2.65	FALSE	0	0.05286	43369936	34.52
		TRUE	High	Sequest HT (A14)	Ambiguous	[H].APATVcGPKKSTNL.[V]	C6(Carbamidomethyl)	1	1	QHD43416.1_S2_RBD	QHD43416.1_S2_RBD	0	2	0.5803	0	1	1	722.386	1443.76	1443.76	1.49	0.00107	ETD (Electron Transfer Dissociation)	MS2	62.3145	17.954	35.0801	8933	200428_Lumos_(LC1200)_nanoFlex_Ieva_SARS_CoV2_i1_Chy_Chymo_90min_ETD_HCD_2ul.raw	F11		2.74	FALSE	0	0.0572
		TRUE	High	Sequest HT (A14)	Ambiguous	[H].APATVcGPKKSTNL.[V]	C6(Carbamidomethyl)	1	1	QHD43416.1_S2_RBD	QHD43416.1_S2_RBD	0	2	0.6711	0	1	1	722.385	1443.76	1443.76	-0.12	-9e-05	ETD (Electron Transfer Dissociation)	MS2	29.7862	32.247	35.4419	9028	200428_Lumos_(LC1200)_nanoFlex_Ieva_SARS_CoV2_i1_Chy_Chymo_90min_ETD_HCD_2ul.raw	F11		3.04	FALSE	0	0.0483
		TRUE	High	Sequest HT (A14)	Ambiguous	[H].APATVcGPKKSTNL.[V]	C6(Carbamidomethyl)	1	1	QHD43416.1_S2_RBD	QHD43416.1_S2_RBD	0	2	0.6378	0	1	1	722.384	1443.76	1443.76	-0.63	-0.00045	ETD (Electron Transfer Dissociation)	MS2	0	40.619	35.7855	9125	200428_Lumos_(LC1200)_nanoFlex_Ieva_SARS_CoV2_i1_Chy_Chymo_90min_ETD_HCD_2ul.raw	F11		3.12	FALSE	0	0.08264
		TRUE	High	Sequest HT (A14)	Ambiguous	[H].APATVcGPKKSTNL.[V]	C6(Carbamidomethyl)	1	1	QHD43416.1_S2_RBD	QHD43416.1_S2_RBD	0	3	0.5519	0	1	1	481.926	1443.76	1443.76	0.32	0.00015	ETD (Electron Transfer Dissociation)	MS2	20.4151	39.031	41.5381	10757	200428_Lumos_(LC1200)_nanoFlex_Ieva_SARS_CoV2_i1_Chy_Chymo_90min_ETD_HCD_2ul.raw	F11		4.53	FALSE	0	0.03047	3.72039e+06	41.59
		TRUE	High	Sequest HT (A18)	Ambiguous	[H].APATVcGPKKSTNL.[V]	C6(Carbamidomethyl)	1	1	QHD43416.1_S2_RBD	QHD43416.1_S2_RBD	0	2	0.5479	0	1	1	722.385	1443.76	1443.76	-0.46	-0.00033	HCD (High Energy Collision Dissociation)	MS2	0	14.413	34.3859	8761	200428_Lumos_(LC1200)_nanoFlex_Ieva_SARS_CoV2_i1_Chy_Chymo_90min_ETD_HCD_2ul.raw	F11		4.07	FALSE	0	0.008302	43369936	34.52
		TRUE	High	Sequest HT (A18)	Ambiguous	[H].APATVcGPKKSTNL.[V]	C6(Carbamidomethyl)	1	1	QHD43416.1_S2_RBD	QHD43416.1_S2_RBD	0	2	0.5101	0	1	1	722.385	1443.76	1443.76	0.47	0.00034	HCD (High Energy Collision Dissociation)	MS2	20.284	28.925	34.754	8850	200428_Lumos_(LC1200)_nanoFlex_Ieva_SARS_CoV2_i1_Chy_Chymo_90min_ETD_HCD_2ul.raw	F11		4.45	FALSE	0	0.001853	43369936	34.52
		TRUE	High	Sequest HT (A18)	Ambiguous	[H].APATVcGPKKSTNL.[V]	C6(Carbamidomethyl)	1	1	QHD43416.1_S2_RBD	QHD43416.1_S2_RBD	0	2	0.5636	0	1	1	722.386	1443.76	1443.76	1.49	0.00107	HCD (High Energy Collision Dissociation)	MS2	62.3145	13.028	35.0882	8934	200428_Lumos_(LC1200)_nanoFlex_Ieva_SARS_CoV2_i1_Chy_Chymo_90min_ETD_HCD_2ul.raw	F11		4.4	FALSE	0	0.005648
		TRUE	High	Sequest HT (A18)	Ambiguous	[H].APATVcGPKKSTNL.[V]	C6(Carbamidomethyl)	1	1	QHD43416.1_S2_RBD	QHD43416.1_S2_RBD	0	2	0.5657	0	1	1	722.385	1443.76	1443.76	-0.12	-9e-05	HCD (High Energy Collision Dissociation)	MS2	29.7862	18.577	35.4498	9029	200428_Lumos_(LC1200)_nanoFlex_Ieva_SARS_CoV2_i1_Chy_Chymo_90min_ETD_HCD_2ul.raw	F11		3.5	FALSE	0	0.03933
		TRUE	High	Sequest HT (A18)	Ambiguous	[H].APATVcGPKKSTNL.[V]	C6(Carbamidomethyl)	1	1	QHD43416.1_S2_RBD	QHD43416.1_S2_RBD	0	2	0.5619	0	1	1	722.384	1443.76	1443.76	-0.63	-0.00045	HCD (High Energy Collision Dissociation)	MS2	0	49.708	35.7933	9127	200428_Lumos_(LC1200)_nanoFlex_Ieva_SARS_CoV2_i1_Chy_Chymo_90min_ETD_HCD_2ul.raw	F11		4.36	FALSE	0	0.01792
		TRUE	High	Sequest HT (A18)	Ambiguous	[H].APATVcGPKKSTNL.[V]	C6(Carbamidomethyl)	1	1	QHD43416.1_S2_RBD	QHD43416.1_S2_RBD	0	3	0.3211	0	1	1	481.926	1443.76	1443.76	0.32	0.00015	HCD (High Energy Collision Dissociation)	MS2	20.4151	26.62	41.5467	10759	200428_Lumos_(LC1200)_nanoFlex_Ieva_SARS_CoV2_i1_Chy_Chymo_90min_ETD_HCD_2ul.raw	F11		4.08	FALSE	0	0.06498	3.72039e+06	41.59
	TRUE	High	[Y].AWNRKRISNCVADY.[S]	1xCarbamidomethyl [C10]		FALSE	0.0590008	0	1	1	3	QHD43416.1_S2_RBD	QHD43416.1_S2_RBD [179-192]	1	1752.86	8.24027e+06		High	High	0	0.1146	3.05	60.64
		Checked	Confidence	Identifying Node	PSM Ambiguity	Annotated Sequence	Modifications	# Protein Groups	# Proteins	Master Protein Accessions	Protein Accessions	# Missed Cleavages	Charge	DeltaScore	DeltaCn	Rank	Search Engine Rank	m/z [Da]	MH+ [Da]	Theo. MH+ [Da]	DeltaM [ppm]	Deltam/z [Da]	Activation Type	MS Order	Isolation Interference [%]	Ion Inject Time [ms]	RT [min]	First Scan	Spectrum File	File ID	Quan Info	XCorr	Contaminant	Percolator q-Value	Percolator PEP	Precursor Abundance	Apex RT [min]
		TRUE	High	Sequest HT (A2)	Unambiguous	[Y].AWNRKRISNcVADY.[S]	C10(Carbamidomethyl)	1	1	QHD43416.1_S2_RBD	QHD43416.1_S2_RBD	1	3	0.541	0	1	1	584.958	1752.86	1752.86	0.52	0.0003	ETD (Electron Transfer Dissociation)	MS2	54.5766	7.118	60.6278	16304	200428_Lumos_(LC1200)_nanoFlex_Ieva_SARS_CoV2_i1_Chy_Chymo_90min_ETD_HCD_2ul.raw	F11		3.05	FALSE	0	0.1146	8.24027e+06	60.64
		TRUE	Medium	Sequest HT (A16)	Ambiguous	[Y].AWNRKRISNcVADY.[S]	C10(Carbamidomethyl)	1	1	QHD43416.1_S2_RBD	QHD43416.1_S2_RBD	1	3	0.1435	0	1	1	584.958	1752.86	1752.86	0.52	0.0003	HCD (High Energy Collision Dissociation)	MS2	54.5766	5.85	60.636	16306	200428_Lumos_(LC1200)_nanoFlex_Ieva_SARS_CoV2_i1_Chy_Chymo_90min_ETD_HCD_2ul.raw	F11		2.23	FALSE	0.04541	0.5371	8.24027e+06	60.64
		TRUE	Low	Sequest HT (A18)	Ambiguous	[Y].AWNRKRISNcVADY.[S]	C10(Carbamidomethyl)	1	1	QHD43416.1_S2_RBD	QHD43416.1_S2_RBD	1	3	0.1166	0	1	1	584.958	1752.86	1752.86	0.52	0.0003	HCD (High Energy Collision Dissociation)	MS2	54.5766	5.85	60.636	16306	200428_Lumos_(LC1200)_nanoFlex_Ieva_SARS_CoV2_i1_Chy_Chymo_90min_ETD_HCD_2ul.raw	F11		2.23	FALSE	0.3314	0.85	8.24027e+06	60.64
	TRUE	High	[I].AWNSNNLDSKVGGNY.[N]			FALSE	0.000720554	0	1	1	2	QHD43416.1_S2_RBD	QHD43416.1_S2_RBD [262-276]	2	1638.75	7224272		High	High	0	0.0008321	4.18	77.96
		Checked	Confidence	Identifying Node	PSM Ambiguity	Annotated Sequence	Modifications	# Protein Groups	# Proteins	Master Protein Accessions	Protein Accessions	# Missed Cleavages	Charge	DeltaScore	DeltaCn	Rank	Search Engine Rank	m/z [Da]	MH+ [Da]	Theo. MH+ [Da]	DeltaM [ppm]	Deltam/z [Da]	Activation Type	MS Order	Isolation Interference [%]	Ion Inject Time [ms]	RT [min]	First Scan	Spectrum File	File ID	Quan Info	XCorr	Contaminant	Percolator q-Value	Percolator PEP	Precursor Abundance	Apex RT [min]
		TRUE	High	Sequest HT (A14)	Ambiguous	[I].AWNSNNLDSKVGGNY.[N]		1	1	QHD43416.1_S2_RBD	QHD43416.1_S2_RBD	2	2	0.7344	0	1	1	819.879	1638.75	1638.75	0.44	0.00036	ETD (Electron Transfer Dissociation)	MS2	49.8226	11.121	77.9126	21732	200428_Lumos_(LC1200)_nanoFlex_Ieva_SARS_CoV2_i1_Chy_Chymo_90min_ETD_HCD_2ul.raw	F11		4.18	FALSE	0	0.0008321	7224272	77.96
		TRUE	High	Sequest HT (A18)	Ambiguous	[I].AWNSNNLDSKVGGNY.[N]		1	1	QHD43416.1_S2_RBD	QHD43416.1_S2_RBD	2	2	0.5684	0	1	1	819.879	1638.75	1638.75	0.44	0.00036	HCD (High Energy Collision Dissociation)	MS2	49.8226	8.84	77.9198	21734	200428_Lumos_(LC1200)_nanoFlex_Ieva_SARS_CoV2_i1_Chy_Chymo_90min_ETD_HCD_2ul.raw	F11		3.73	FALSE	0	0.00716	7224272	77.96
	TRUE	High	[L].CFTNVY.[A]	1xCarbamidomethyl [C1]		FALSE	0.104387	0.00936225	1	1	7	QHD43416.1_S2_RBD	QHD43416.1_S2_RBD [218-223]	1	803.339	22910760		High	High	0.0009067	0.1769	1.59	76.55
		Checked	Confidence	Identifying Node	PSM Ambiguity	Annotated Sequence	Modifications	# Protein Groups	# Proteins	Master Protein Accessions	Protein Accessions	# Missed Cleavages	Charge	DeltaScore	DeltaCn	Rank	Search Engine Rank	m/z [Da]	MH+ [Da]	Theo. MH+ [Da]	DeltaM [ppm]	Deltam/z [Da]	Activation Type	MS Order	Isolation Interference [%]	Ion Inject Time [ms]	RT [min]	First Scan	Spectrum File	File ID	Quan Info	XCorr	Contaminant	Percolator q-Value	Percolator PEP	Precursor Abundance	Apex RT [min]
		TRUE	High	Sequest HT (A2)	Unambiguous	[L].cFTNVY.[A]	C1(Carbamidomethyl)	1	1	QHD43416.1_S2_RBD	QHD43416.1_S2_RBD	1	2	0.4403	0	1	1	402.173	803.34	803.339	0.49	0.0002	ETD (Electron Transfer Dissociation)	MS2	17.0577	63.512	76.4259	21255	200428_Lumos_(LC1200)_nanoFlex_Ieva_SARS_CoV2_i1_Chy_Chymo_90min_ETD_HCD_2ul.raw	F11		1.59	FALSE	0.0009067	0.1769	22910760	76.55
		TRUE	Low	Sequest HT (A2)	Ambiguous	[L].cFTNVY.[A]	C1(Carbamidomethyl)	1	1	QHD43416.1_S2_RBD	QHD43416.1_S2_RBD	1	2	0.4379	0	1	1	402.173	803.339	803.339	-0.34	-0.00014	ETD (Electron Transfer Dissociation)	MS2	0	34.807	76.8082	21380	200428_Lumos_(LC1200)_nanoFlex_Ieva_SARS_CoV2_i1_Chy_Chymo_90min_ETD_HCD_2ul.raw	F11		1.53	FALSE	0.06909	0.6891	22910760	76.55
		TRUE	Low	Sequest HT (A14)	Ambiguous	[L].cFTNVY.[A]	C1(Carbamidomethyl)	1	1	QHD43416.1_S2_RBD	QHD43416.1_S2_RBD	1	2	0.4379	0	1	1	402.173	803.339	803.339	-0.34	-0.00014	ETD (Electron Transfer Dissociation)	MS2	0	34.807	76.8082	21380	200428_Lumos_(LC1200)_nanoFlex_Ieva_SARS_CoV2_i1_Chy_Chymo_90min_ETD_HCD_2ul.raw	F11		1.53	FALSE	0.3584	0.8108	22910760	76.55
		TRUE	Low	Sequest HT (A16)	Ambiguous	[L].cFTNVY.[A]	C1(Carbamidomethyl)	1	1	QHD43416.1_S2_RBD	QHD43416.1_S2_RBD	1	2	0.0956	0	1	1	402.173	803.34	803.339	0.49	0.0002	HCD (High Energy Collision Dissociation)	MS2	17.0577	20.364	76.436	21257	200428_Lumos_(LC1200)_nanoFlex_Ieva_SARS_CoV2_i1_Chy_Chymo_90min_ETD_HCD_2ul.raw	F11		1.36	FALSE	0.8637	1	22910760	76.55
		TRUE	Low	Sequest HT (A16)	Ambiguous	[L].cFTNVY.[A]	C1(Carbamidomethyl)	1	1	QHD43416.1_S2_RBD	QHD43416.1_S2_RBD	1	2	0.2336	0	1	1	402.173	803.339	803.339	-0.34	-0.00014	HCD (High Energy Collision Dissociation)	MS2	0	28.339	76.8176	21382	200428_Lumos_(LC1200)_nanoFlex_Ieva_SARS_CoV2_i1_Chy_Chymo_90min_ETD_HCD_2ul.raw	F11		1.37	FALSE	0.9246	1	22910760	76.55
		TRUE	Low	Sequest HT (A18)	Ambiguous	[L].cFTNVY.[A]	C1(Carbamidomethyl)	1	1	QHD43416.1_S2_RBD	QHD43416.1_S2_RBD	1	2	0.2574	0	1	1	402.173	803.34	803.339	0.49	0.0002	HCD (High Energy Collision Dissociation)	MS2	17.0577	20.364	76.436	21257	200428_Lumos_(LC1200)_nanoFlex_Ieva_SARS_CoV2_i1_Chy_Chymo_90min_ETD_HCD_2ul.raw	F11		1.36	FALSE	0.9444	1	22910760	76.55
		TRUE	Low	Sequest HT (A18)	Ambiguous	[L].cFTNVY.[A]	C1(Carbamidomethyl)	1	1	QHD43416.1_S2_RBD	QHD43416.1_S2_RBD	1	2	0.292	0	1	1	402.173	803.339	803.339	-0.34	-0.00014	HCD (High Energy Collision Dissociation)	MS2	0	28.339	76.8176	21382	200428_Lumos_(LC1200)_nanoFlex_Ieva_SARS_CoV2_i1_Chy_Chymo_90min_ETD_HCD_2ul.raw	F11		1.37	FALSE	0.9722	1	22910760	76.55
	TRUE	High	[V].CGPKKSTNL.[V]	1xCarbamidomethyl [C1]		FALSE	0.0885837	0.00936225	1	1	10	QHD43416.1_S2_RBD	QHD43416.1_S2_RBD [352-360]	0	1004.52	178923472		High	High	0.004512	0.1626	3.72	31.62
		Checked	Confidence	Identifying Node	PSM Ambiguity	Annotated Sequence	Modifications	# Protein Groups	# Proteins	Master Protein Accessions	Protein Accessions	# Missed Cleavages	Charge	DeltaScore	DeltaCn	Rank	Search Engine Rank	m/z [Da]	MH+ [Da]	Theo. MH+ [Da]	DeltaM [ppm]	Deltam/z [Da]	Activation Type	MS Order	Isolation Interference [%]	Ion Inject Time [ms]	RT [min]	First Scan	Spectrum File	File ID	Quan Info	XCorr	Contaminant	Percolator q-Value	Percolator PEP	Precursor Abundance	Apex RT [min]
		TRUE	High	Sequest HT (A14)	Ambiguous	[V].cGPKKSTNL.[V]	C1(Carbamidomethyl)	1	1	QHD43416.1_S2_RBD	QHD43416.1_S2_RBD	0	2	0.3706	0	1	1	502.763	1004.52	1004.52	0.24	0.00012	ETD (Electron Transfer Dissociation)	MS2	18.9166	30.064	21.8518	5313	200428_Lumos_(LC1200)_nanoFlex_Ieva_SARS_CoV2_i1_Chy_Chymo_90min_ETD_HCD_2ul.raw	F11		1.97	FALSE	0.001329	0.2	67793888	22.14
		TRUE	Medium	Sequest HT (A14)	Ambiguous	[V].cGPKKSTNL.[V]	C1(Carbamidomethyl)	1	1	QHD43416.1_S2_RBD	QHD43416.1_S2_RBD	0	2	0.3302	0	1	1	502.764	1004.52	1004.52	0.42	0.00021	ETD (Electron Transfer Dissociation)	MS2	5.90191	5.31	22.2277	5412	200428_Lumos_(LC1200)_nanoFlex_Ieva_SARS_CoV2_i1_Chy_Chymo_90min_ETD_HCD_2ul.raw	F11		2.15	FALSE	0.03008	0.3858	67793888	22.14
		TRUE	High	Sequest HT (A14)	Ambiguous	[V].cGPKKSTNL.[V]	C1(Carbamidomethyl)	1	1	QHD43416.1_S2_RBD	QHD43416.1_S2_RBD	0	2	0.3896	0	1	1	502.763	1004.52	1004.52	0.05	3e-05	ETD (Electron Transfer Dissociation)	MS2	13.3889	13.791	31.3935	7920	200428_Lumos_(LC1200)_nanoFlex_Ieva_SARS_CoV2_i1_Chy_Chymo_90min_ETD_HCD_2ul.raw	F11		2.31	FALSE	0.004942	0.2594	111129584	31.62
		TRUE	High	Sequest HT (A14)	Ambiguous	[V].cGPKKSTNL.[V]	C1(Carbamidomethyl)	1	1	QHD43416.1_S2_RBD	QHD43416.1_S2_RBD	0	2	0.4455	0	1	1	502.763	1004.52	1004.52	-0.43	-0.00022	ETD (Electron Transfer Dissociation)	MS2	3.69894	4.846	31.7328	8019	200428_Lumos_(LC1200)_nanoFlex_Ieva_SARS_CoV2_i1_Chy_Chymo_90min_ETD_HCD_2ul.raw	F11		2.11	FALSE	0	0.1545	111129584	31.62
		TRUE	High	Sequest HT (A14)	Ambiguous	[V].cGPKKSTNL.[V]	C1(Carbamidomethyl)	1	1	QHD43416.1_S2_RBD	QHD43416.1_S2_RBD	0	2	0.3698	0	1	1	502.763	1004.52	1004.52	0.05	3e-05	ETD (Electron Transfer Dissociation)	MS2	10.1002	6.29	32.0917	8117	200428_Lumos_(LC1200)_nanoFlex_Ieva_SARS_CoV2_i1_Chy_Chymo_90min_ETD_HCD_2ul.raw	F11		1.92	FALSE	0.004942	0.2557	111129584	31.62
		TRUE	High	Sequest HT (A18)	Ambiguous	[V].cGPKKSTNL.[V]	C1(Carbamidomethyl)	1	1	QHD43416.1_S2_RBD	QHD43416.1_S2_RBD	0	2	0.5229	0	1	1	502.763	1004.52	1004.52	0.24	0.00012	HCD (High Energy Collision Dissociation)	MS2	18.9166	20.527	21.8616	5315	200428_Lumos_(LC1200)_nanoFlex_Ieva_SARS_CoV2_i1_Chy_Chymo_90min_ETD_HCD_2ul.raw	F11		3.5	FALSE	0.003676	0.1074	67793888	22.14
		TRUE	High	Sequest HT (A18)	Ambiguous	[V].cGPKKSTNL.[V]	C1(Carbamidomethyl)	1	1	QHD43416.1_S2_RBD	QHD43416.1_S2_RBD	0	2	0.5754	0	1	1	502.764	1004.52	1004.52	0.42	0.00021	HCD (High Energy Collision Dissociation)	MS2	5.90191	4.941	22.2415	5414	200428_Lumos_(LC1200)_nanoFlex_Ieva_SARS_CoV2_i1_Chy_Chymo_90min_ETD_HCD_2ul.raw	F11		3.58	FALSE	0.007192	0.2918	67793888	22.14
		TRUE	High	Sequest HT (A18)	Ambiguous	[V].cGPKKSTNL.[V]	C1(Carbamidomethyl)	1	1	QHD43416.1_S2_RBD	QHD43416.1_S2_RBD	0	2	0.5484	0	1	1	502.763	1004.52	1004.52	0.05	3e-05	HCD (High Energy Collision Dissociation)	MS2	13.3889	5.586	31.4054	7922	200428_Lumos_(LC1200)_nanoFlex_Ieva_SARS_CoV2_i1_Chy_Chymo_90min_ETD_HCD_2ul.raw	F11		3.72	FALSE	0.004512	0.1626	111129584	31.62
		TRUE	High	Sequest HT (A18)	Ambiguous	[V].cGPKKSTNL.[V]	C1(Carbamidomethyl)	1	1	QHD43416.1_S2_RBD	QHD43416.1_S2_RBD	0	2	0.5569	0	1	1	502.763	1004.52	1004.52	-0.43	-0.00022	HCD (High Energy Collision Dissociation)	MS2	3.69894	2.593	31.7415	8021	200428_Lumos_(LC1200)_nanoFlex_Ieva_SARS_CoV2_i1_Chy_Chymo_90min_ETD_HCD_2ul.raw	F11		3.25	FALSE	0.004512	0.1968	111129584	31.62
		TRUE	High	Sequest HT (A18)	Ambiguous	[V].cGPKKSTNL.[V]	C1(Carbamidomethyl)	1	1	QHD43416.1_S2_RBD	QHD43416.1_S2_RBD	0	2	0.5116	0	1	1	502.763	1004.52	1004.52	0.05	3e-05	HCD (High Energy Collision Dissociation)	MS2	10.1002	4.454	32.0999	8119	200428_Lumos_(LC1200)_nanoFlex_Ieva_SARS_CoV2_i1_Chy_Chymo_90min_ETD_HCD_2ul.raw	F11		3.46	FALSE	0.007192	0.3134	111129584	31.62
	TRUE	High	[L].DSKVGGNY.[N]			FALSE	0.0776423	0.00658825	1	1	3	QHD43416.1_S2_RBD	QHD43416.1_S2_RBD [269-276]	0	839.389	1025629632		High	High	0	0.142	1.94	33.84
		Checked	Confidence	Identifying Node	PSM Ambiguity	Annotated Sequence	Modifications	# Protein Groups	# Proteins	Master Protein Accessions	Protein Accessions	# Missed Cleavages	Charge	DeltaScore	DeltaCn	Rank	Search Engine Rank	m/z [Da]	MH+ [Da]	Theo. MH+ [Da]	DeltaM [ppm]	Deltam/z [Da]	Activation Type	MS Order	Isolation Interference [%]	Ion Inject Time [ms]	RT [min]	First Scan	Spectrum File	File ID	Quan Info	XCorr	Contaminant	Percolator q-Value	Percolator PEP	Precursor Abundance	Apex RT [min]
		TRUE	High	Sequest HT (A2)	Unambiguous	[L].DSKVGGNY.[N]		1	1	QHD43416.1_S2_RBD	QHD43416.1_S2_RBD	0	2	0.6186	0	1	1	420.199	839.39	839.389	0.53	0.00022	ETD (Electron Transfer Dissociation)	MS2	0	14.736	33.7549	8572	200428_Lumos_(LC1200)_nanoFlex_Ieva_SARS_CoV2_i1_Chy_Chymo_90min_ETD_HCD_2ul.raw	F11		1.94	FALSE	0	0.142	1025629632	33.84
		TRUE	Medium	Sequest HT (A16)	Ambiguous	[L].DSKVGGNY.[N]		1	1	QHD43416.1_S2_RBD	QHD43416.1_S2_RBD	0	2	0.4559	0	1	1	420.199	839.39	839.389	0.53	0.00022	HCD (High Energy Collision Dissociation)	MS2	0	1.247	33.7637	8574	200428_Lumos_(LC1200)_nanoFlex_Ieva_SARS_CoV2_i1_Chy_Chymo_90min_ETD_HCD_2ul.raw	F11		2.61	FALSE	0.04155	0.5073	1025629632	33.84
		TRUE	Medium	Sequest HT (A18)	Ambiguous	[L].DSKVGGNY.[N]		1	1	QHD43416.1_S2_RBD	QHD43416.1_S2_RBD	0	2	0.1648	0	1	1	420.199	839.39	839.389	0.53	0.00022	HCD (High Energy Collision Dissociation)	MS2	0	1.247	33.7637	8574	200428_Lumos_(LC1200)_nanoFlex_Ieva_SARS_CoV2_i1_Chy_Chymo_90min_ETD_HCD_2ul.raw	F11		2.61	FALSE	0.0286	0.4703	1025629632	33.84
	TRUE	High	[L].DSKVGGNYNYL.[Y]			FALSE	0.0214593	0	1	1	3	QHD43416.1_S2_RBD	QHD43416.1_S2_RBD [269-279]	2	1229.58	4371097		High	High	0	0.04894	2.49	77.09
		Checked	Confidence	Identifying Node	PSM Ambiguity	Annotated Sequence	Modifications	# Protein Groups	# Proteins	Master Protein Accessions	Protein Accessions	# Missed Cleavages	Charge	DeltaScore	DeltaCn	Rank	Search Engine Rank	m/z [Da]	MH+ [Da]	Theo. MH+ [Da]	DeltaM [ppm]	Deltam/z [Da]	Activation Type	MS Order	Isolation Interference [%]	Ion Inject Time [ms]	RT [min]	First Scan	Spectrum File	File ID	Quan Info	XCorr	Contaminant	Percolator q-Value	Percolator PEP	Precursor Abundance	Apex RT [min]
		TRUE	High	Sequest HT (A2)	Unambiguous	[L].DSKVGGNYNYL.[Y]		1	1	QHD43416.1_S2_RBD	QHD43416.1_S2_RBD	2	2	0.5783	0	1	1	615.293	1229.58	1229.58	-0.34	-0.00021	ETD (Electron Transfer Dissociation)	MS2	25.0622	22.12	77.0719	21461	200428_Lumos_(LC1200)_nanoFlex_Ieva_SARS_CoV2_i1_Chy_Chymo_90min_ETD_HCD_2ul.raw	F11		2.49	FALSE	0	0.04894	4371097	77.09
		TRUE	Medium	Sequest HT (A16)	Ambiguous	[L].DSKVGGNYNYL.[Y]		1	1	QHD43416.1_S2_RBD	QHD43416.1_S2_RBD	2	2	0.3744	0	1	1	615.293	1229.58	1229.58	-0.34	-0.00021	HCD (High Energy Collision Dissociation)	MS2	25.0622	18.759	77.0796	21463	200428_Lumos_(LC1200)_nanoFlex_Ieva_SARS_CoV2_i1_Chy_Chymo_90min_ETD_HCD_2ul.raw	F11		2.27	FALSE	0.01185	0.3576	4371097	77.09
		TRUE	Low	Sequest HT (A18)	Ambiguous	[L].DSKVGGNYNYL.[Y]		1	1	QHD43416.1_S2_RBD	QHD43416.1_S2_RBD	2	2	0.3744	0	1	1	615.293	1229.58	1229.58	-0.34	-0.00021	HCD (High Energy Collision Dissociation)	MS2	25.0622	18.759	77.0796	21463	200428_Lumos_(LC1200)_nanoFlex_Ieva_SARS_CoV2_i1_Chy_Chymo_90min_ETD_HCD_2ul.raw	F11		2.27	FALSE	0.6075	0.9704	4371097	77.09
	TRUE	High	[F].ELLHAPATVCGPK.[K]	1xCarbamidomethyl [C10]		FALSE	0.012198	0	1	1	9	QHD43416.1_S2_RBD	QHD43416.1_S2_RBD [343-355]	2	1392.73	100770232		High	High	0	0.1095	4.52	62.73
		Checked	Confidence	Identifying Node	PSM Ambiguity	Annotated Sequence	Modifications	# Protein Groups	# Proteins	Master Protein Accessions	Protein Accessions	# Missed Cleavages	Charge	DeltaScore	DeltaCn	Rank	Search Engine Rank	m/z [Da]	MH+ [Da]	Theo. MH+ [Da]	DeltaM [ppm]	Deltam/z [Da]	Activation Type	MS Order	Isolation Interference [%]	Ion Inject Time [ms]	RT [min]	First Scan	Spectrum File	File ID	Quan Info	XCorr	Contaminant	Percolator q-Value	Percolator PEP	Precursor Abundance	Apex RT [min]
		TRUE	High	Sequest HT (A14)	Ambiguous	[F].ELLHAPATVcGPK.[K]	C10(Carbamidomethyl)	1	1	QHD43416.1_S2_RBD	QHD43416.1_S2_RBD	2	3	0.6416	0	1	1	464.915	1392.73	1392.73	0.58	0.00027	ETD (Electron Transfer Dissociation)	MS2	23.9815	37.482	62.5016	16873	200428_Lumos_(LC1200)_nanoFlex_Ieva_SARS_CoV2_i1_Chy_Chymo_90min_ETD_HCD_2ul.raw	F11		4.52	FALSE	0	0.1095	71538632	62.73
		TRUE	Low	Sequest HT (A14)	Ambiguous	[F].ELLHAPATVcGPK.[K]	C10(Carbamidomethyl)	1	1	QHD43416.1_S2_RBD	QHD43416.1_S2_RBD	2	2	0.5432	0	1	1	696.869	1392.73	1392.73	0.26	0.00018	ETD (Electron Transfer Dissociation)	MS2	37.7511	12.964	62.5711	16895	200428_Lumos_(LC1200)_nanoFlex_Ieva_SARS_CoV2_i1_Chy_Chymo_90min_ETD_HCD_2ul.raw	F11		1.62	FALSE	0.7286	1	29231600	62.73
		TRUE	High	Sequest HT (A14)	Ambiguous	[F].ELLHAPATVcGPK.[K]	C10(Carbamidomethyl)	1	1	QHD43416.1_S2_RBD	QHD43416.1_S2_RBD	2	3	0.6366	0	1	1	464.915	1392.73	1392.73	0.91	0.00042	ETD (Electron Transfer Dissociation)	MS2	0.538636	6.407	62.8649	16982	200428_Lumos_(LC1200)_nanoFlex_Ieva_SARS_CoV2_i1_Chy_Chymo_90min_ETD_HCD_2ul.raw	F11		4.21	FALSE	0	0.1459	71538632	62.73
		TRUE	Low	Sequest HT (A14)	Ambiguous	[F].ELLHAPATVcGPK.[K]	C10(Carbamidomethyl)	1	1	QHD43416.1_S2_RBD	QHD43416.1_S2_RBD	2	2	0.1895	0	1	1	696.869	1392.73	1392.73	0.7	0.00049	ETD (Electron Transfer Dissociation)	MS2	28.2602	9.835	62.9479	17009	200428_Lumos_(LC1200)_nanoFlex_Ieva_SARS_CoV2_i1_Chy_Chymo_90min_ETD_HCD_2ul.raw	F11		0.95	FALSE	0.9447	1	29231600	62.73
		TRUE	High	Sequest HT (A18)	Ambiguous	[F].ELLHAPATVcGPK.[K]	C10(Carbamidomethyl)	1	1	QHD43416.1_S2_RBD	QHD43416.1_S2_RBD	2	3	0.5864	0	1	1	464.915	1392.73	1392.73	0.58	0.00027	HCD (High Energy Collision Dissociation)	MS2	23.9815	23.933	62.5105	16875	200428_Lumos_(LC1200)_nanoFlex_Ieva_SARS_CoV2_i1_Chy_Chymo_90min_ETD_HCD_2ul.raw	F11		3.82	FALSE	0	0.08535	71538632	62.73
		TRUE	High	Sequest HT (A18)	Ambiguous	[F].ELLHAPATVcGPK.[K]	C10(Carbamidomethyl)	1	1	QHD43416.1_S2_RBD	QHD43416.1_S2_RBD	2	2	0.6833	0	1	1	696.869	1392.73	1392.73	0.26	0.00018	HCD (High Energy Collision Dissociation)	MS2	37.7511	8.764	62.5785	16897	200428_Lumos_(LC1200)_nanoFlex_Ieva_SARS_CoV2_i1_Chy_Chymo_90min_ETD_HCD_2ul.raw	F11		3.41	FALSE	0	0.02155	29231600	62.73
		TRUE	High	Sequest HT (A18)	Ambiguous	[F].ELLHAPATVcGPK.[K]	C10(Carbamidomethyl)	1	1	QHD43416.1_S2_RBD	QHD43416.1_S2_RBD	2	3	0.6096	0	1	1	464.915	1392.73	1392.73	0.91	0.00042	HCD (High Energy Collision Dissociation)	MS2	0.538636	4.215	62.8761	16984	200428_Lumos_(LC1200)_nanoFlex_Ieva_SARS_CoV2_i1_Chy_Chymo_90min_ETD_HCD_2ul.raw	F11		2.92	FALSE	0.004512	0.1811	71538632	62.73
		TRUE	Low	Sequest HT (A18)	Ambiguous	[F].ELLHAPATVcGPK.[K]	C10(Carbamidomethyl)	1	1	QHD43416.1_S2_RBD	QHD43416.1_S2_RBD	2	2	0.2986	0	1	1	696.869	1392.73	1392.73	0.7	0.00049	HCD (High Energy Collision Dissociation)	MS2	28.2602	10.237	62.9587	17011	200428_Lumos_(LC1200)_nanoFlex_Ieva_SARS_CoV2_i1_Chy_Chymo_90min_ETD_HCD_2ul.raw	F11		2.11	FALSE	0.4642	0.9131	29231600	62.73
		TRUE	High	Sequest HT (A18)	Ambiguous	[F].ELLHAPATVcGPK.[K]	C10(Carbamidomethyl)	1	1	QHD43416.1_S2_RBD	QHD43416.1_S2_RBD	2	2	0.5113	0	1	1	696.869	1392.73	1392.73	0.17	0.00012	HCD (High Energy Collision Dissociation)	MS2	75.1298	9.482	86.8609	24644	200428_Lumos_(LC1200)_nanoFlex_Ieva_SARS_CoV2_i1_Chy_Chymo_90min_ETD_HCD_2ul.raw	F11		2.21	FALSE	0.005986	0.2773	3.29212e+06	87.31
	TRUE	High	[F].ELLHAPATVCGPKK.[S]	1xCarbamidomethyl [C10]		FALSE	0.0876856	0.00936225	1	1	2	QHD43416.1_S2_RBD	QHD43416.1_S2_RBD [343-356]	2	1520.83	2.28731e+06		High	High	0	0.08303	5	52.58
		Checked	Confidence	Identifying Node	PSM Ambiguity	Annotated Sequence	Modifications	# Protein Groups	# Proteins	Master Protein Accessions	Protein Accessions	# Missed Cleavages	Charge	DeltaScore	DeltaCn	Rank	Search Engine Rank	m/z [Da]	MH+ [Da]	Theo. MH+ [Da]	DeltaM [ppm]	Deltam/z [Da]	Activation Type	MS Order	Isolation Interference [%]	Ion Inject Time [ms]	RT [min]	First Scan	Spectrum File	File ID	Quan Info	XCorr	Contaminant	Percolator q-Value	Percolator PEP	Precursor Abundance	Apex RT [min]
		TRUE	High	Sequest HT (A14)	Ambiguous	[F].ELLHAPATVcGPKK.[S]	C10(Carbamidomethyl)	1	1	QHD43416.1_S2_RBD	QHD43416.1_S2_RBD	2	4	0.57	0	1	1	380.962	1520.83	1520.83	-0.01	-1e-05	ETD (Electron Transfer Dissociation)	MS2	20.9141	68.573	52.6522	13910	200428_Lumos_(LC1200)_nanoFlex_Ieva_SARS_CoV2_i1_Chy_Chymo_90min_ETD_HCD_2ul.raw	F11		5	FALSE	0	0.08303	2.28731e+06	52.58
		TRUE	Low	Sequest HT (A18)	Ambiguous	[F].ELLHAPATVcGPKK.[S]	C10(Carbamidomethyl)	1	1	QHD43416.1_S2_RBD	QHD43416.1_S2_RBD	2	4	0.5	0	1	1	380.962	1520.83	1520.83	-0.01	-1e-05	HCD (High Energy Collision Dissociation)	MS2	20.9141	49.217	52.6626	13912	200428_Lumos_(LC1200)_nanoFlex_Ieva_SARS_CoV2_i1_Chy_Chymo_90min_ETD_HCD_2ul.raw	F11		3.32	FALSE	0.05362	0.5725	2.28731e+06	52.58
	TRUE	High	[F].ELLHAPATVCGPKKSTN.[L]	1xCarbamidomethyl [C10]		FALSE	0.000304362	0	1	1	4	QHD43416.1_S2_RBD	QHD43416.1_S2_RBD [343-359]	2	1822.95	15959904		High	High	0	0.00539	6.18	52.44
		Checked	Confidence	Identifying Node	PSM Ambiguity	Annotated Sequence	Modifications	# Protein Groups	# Proteins	Master Protein Accessions	Protein Accessions	# Missed Cleavages	Charge	DeltaScore	DeltaCn	Rank	Search Engine Rank	m/z [Da]	MH+ [Da]	Theo. MH+ [Da]	DeltaM [ppm]	Deltam/z [Da]	Activation Type	MS Order	Isolation Interference [%]	Ion Inject Time [ms]	RT [min]	First Scan	Spectrum File	File ID	Quan Info	XCorr	Contaminant	Percolator q-Value	Percolator PEP	Precursor Abundance	Apex RT [min]
		TRUE	High	Sequest HT (A14)	Ambiguous	[F].ELLHAPATVcGPKKSTN.[L]	C10(Carbamidomethyl)	1	1	QHD43416.1_S2_RBD	QHD43416.1_S2_RBD	2	3	0.6764	0	1	1	608.321	1822.95	1822.95	0.93	0.00056	ETD (Electron Transfer Dissociation)	MS2	36.7223	25.11	52.3397	13815	200428_Lumos_(LC1200)_nanoFlex_Ieva_SARS_CoV2_i1_Chy_Chymo_90min_ETD_HCD_2ul.raw	F11		5.16	FALSE	0	0.02691	9213356	52.44
		TRUE	High	Sequest HT (A14)	Ambiguous	[F].ELLHAPATVcGPKKSTN.[L]	C10(Carbamidomethyl)	1	1	QHD43416.1_S2_RBD	QHD43416.1_S2_RBD	2	4	0.6019	0	1	1	456.493	1822.95	1822.95	0.75	0.00034	ETD (Electron Transfer Dissociation)	MS2	68.1959	14.556	52.3657	13823	200428_Lumos_(LC1200)_nanoFlex_Ieva_SARS_CoV2_i1_Chy_Chymo_90min_ETD_HCD_2ul.raw	F11		6.18	FALSE	0	0.00539	6746548	52.46
		TRUE	High	Sequest HT (A18)	Ambiguous	[F].ELLHAPATVcGPKKSTN.[L]	C10(Carbamidomethyl)	1	1	QHD43416.1_S2_RBD	QHD43416.1_S2_RBD	2	3	0.5896	0	1	1	608.321	1822.95	1822.95	0.93	0.00056	HCD (High Energy Collision Dissociation)	MS2	36.7223	12.171	52.3485	13816	200428_Lumos_(LC1200)_nanoFlex_Ieva_SARS_CoV2_i1_Chy_Chymo_90min_ETD_HCD_2ul.raw	F11		5.97	FALSE	0	0.0008015	9213356	52.44
		TRUE	Low	Sequest HT (A18)	Ambiguous	[F].ELLHAPATVcGPKKSTN.[L]	C10(Carbamidomethyl)	1	1	QHD43416.1_S2_RBD	QHD43416.1_S2_RBD	2	4	0.5316	0	1	1	456.493	1822.95	1822.95	0.75	0.00034	HCD (High Energy Collision Dissociation)	MS2	68.1959	11.054	52.3741	13825	200428_Lumos_(LC1200)_nanoFlex_Ieva_SARS_CoV2_i1_Chy_Chymo_90min_ETD_HCD_2ul.raw	F11		3.48	FALSE	0.2219	0.7742	6746548	52.46
	TRUE	High	[F].ELLHAPATVCGPKKSTNL.[V]	1xCarbamidomethyl [C10]		FALSE	9.54821e-05	0	1	1	8	QHD43416.1_S2_RBD	QHD43416.1_S2_RBD [343-360]	2	1936.03	137539110		High	High	0	0.0005721	7.41	63.51
		Checked	Confidence	Identifying Node	PSM Ambiguity	Annotated Sequence	Modifications	# Protein Groups	# Proteins	Master Protein Accessions	Protein Accessions	# Missed Cleavages	Charge	DeltaScore	DeltaCn	Rank	Search Engine Rank	m/z [Da]	MH+ [Da]	Theo. MH+ [Da]	DeltaM [ppm]	Deltam/z [Da]	Activation Type	MS Order	Isolation Interference [%]	Ion Inject Time [ms]	RT [min]	First Scan	Spectrum File	File ID	Quan Info	XCorr	Contaminant	Percolator q-Value	Percolator PEP	Precursor Abundance	Apex RT [min]
		TRUE	High	Sequest HT (A2)	Unambiguous	[F].ELLHAPATVcGPKKSTNL.[V]	C10(Carbamidomethyl)	1	1	QHD43416.1_S2_RBD	QHD43416.1_S2_RBD	2	4	0.6478	0	1	1	484.764	1936.03	1936.03	1.04	0.00051	ETD (Electron Transfer Dissociation)	MS2	26.1844	6.718	63.3992	17148	200428_Lumos_(LC1200)_nanoFlex_Ieva_SARS_CoV2_i1_Chy_Chymo_90min_ETD_HCD_2ul.raw	F11		7.41	FALSE	0	0.0005721	59303632	63.55
		TRUE	High	Sequest HT (A2)	Unambiguous	[F].ELLHAPATVcGPKKSTNL.[V]	C10(Carbamidomethyl)	1	1	QHD43416.1_S2_RBD	QHD43416.1_S2_RBD	2	2	0.4654	0	1	1	968.52	1936.03	1936.03	0.17	0.00017	ETD (Electron Transfer Dissociation)	MS2	17.484	30.738	63.4851	17174	200428_Lumos_(LC1200)_nanoFlex_Ieva_SARS_CoV2_i1_Chy_Chymo_90min_ETD_HCD_2ul.raw	F11		1.59	FALSE	0	0.1239	9296190	63.46
		TRUE	High	Sequest HT (A2)	Unambiguous	[F].ELLHAPATVcGPKKSTNL.[V]	C10(Carbamidomethyl)	1	1	QHD43416.1_S2_RBD	QHD43416.1_S2_RBD	2	3	0.5209	0	1	1	646.016	1936.03	1936.03	0.42	0.00027	ETD (Electron Transfer Dissociation)	MS2	46.4093	1.501	63.6699	17232	200428_Lumos_(LC1200)_nanoFlex_Ieva_SARS_CoV2_i1_Chy_Chymo_90min_ETD_HCD_2ul.raw	F11		4.55	FALSE	0	0.01296	68939288	63.51
		TRUE	High	Sequest HT (A2)	Unambiguous	[F].ELLHAPATVcGPKKSTNL.[V]	C10(Carbamidomethyl)	1	1	QHD43416.1_S2_RBD	QHD43416.1_S2_RBD	2	4	0.6685	0	1	1	484.763	1936.03	1936.03	0.03	2e-05	ETD (Electron Transfer Dissociation)	MS2	15.9782	6.139	63.7758	17266	200428_Lumos_(LC1200)_nanoFlex_Ieva_SARS_CoV2_i1_Chy_Chymo_90min_ETD_HCD_2ul.raw	F11		7.18	FALSE	0	0.0002888	59303632	63.55
		TRUE	High	Sequest HT (A16)	Unambiguous	[F].ELLHAPATVcGPKKSTNL.[V]	C10(Carbamidomethyl)	1	1	QHD43416.1_S2_RBD	QHD43416.1_S2_RBD	2	4	0.4696	0	1	1	484.764	1936.03	1936.03	1.04	0.00051	HCD (High Energy Collision Dissociation)	MS2	26.1844	3.868	63.4082	17150	200428_Lumos_(LC1200)_nanoFlex_Ieva_SARS_CoV2_i1_Chy_Chymo_90min_ETD_HCD_2ul.raw	F11		3.62	FALSE	0.0009362	0.08642	59303632	63.55
		TRUE	High	Sequest HT (A16)	Unambiguous	[F].ELLHAPATVcGPKKSTNL.[V]	C10(Carbamidomethyl)	1	1	QHD43416.1_S2_RBD	QHD43416.1_S2_RBD	2	2	0.7647	0	1	1	968.52	1936.03	1936.03	0.17	0.00017	HCD (High Energy Collision Dissociation)	MS2	17.484	10.039	63.493	17175	200428_Lumos_(LC1200)_nanoFlex_Ieva_SARS_CoV2_i1_Chy_Chymo_90min_ETD_HCD_2ul.raw	F11		3.74	FALSE	0	0.001514	9296190	63.46
		TRUE	High	Sequest HT (A16)	Unambiguous	[F].ELLHAPATVcGPKKSTNL.[V]	C10(Carbamidomethyl)	1	1	QHD43416.1_S2_RBD	QHD43416.1_S2_RBD	2	3	0.4896	0	1	1	646.016	1936.03	1936.03	0.42	0.00027	HCD (High Energy Collision Dissociation)	MS2	46.4093	30.708	63.679	17234	200428_Lumos_(LC1200)_nanoFlex_Ieva_SARS_CoV2_i1_Chy_Chymo_90min_ETD_HCD_2ul.raw	F11		5.78	FALSE	0	0.00655	68939288	63.51
		TRUE	High	Sequest HT (A16)	Unambiguous	[F].ELLHAPATVcGPKKSTNL.[V]	C10(Carbamidomethyl)	1	1	QHD43416.1_S2_RBD	QHD43416.1_S2_RBD	2	4	0.5447	0	1	1	484.763	1936.03	1936.03	0.03	2e-05	HCD (High Energy Collision Dissociation)	MS2	15.9782	8.265	63.7854	17268	200428_Lumos_(LC1200)_nanoFlex_Ieva_SARS_CoV2_i1_Chy_Chymo_90min_ETD_HCD_2ul.raw	F11		3.58	FALSE	0.0009362	0.09221	59303632	63.55
	TRUE	High	[F].ERDISTEIY.[Q]			FALSE	0.0232176	0	1	1	39	QHD43416.1_S2_RBD	QHD43416.1_S2_RBD [292-300]	0	1125.54	8666747448		High	High	0.002712	0.2122	3.01	67.35
		Checked	Confidence	Identifying Node	PSM Ambiguity	Annotated Sequence	Modifications	# Protein Groups	# Proteins	Master Protein Accessions	Protein Accessions	# Missed Cleavages	Charge	DeltaScore	DeltaCn	Rank	Search Engine Rank	m/z [Da]	MH+ [Da]	Theo. MH+ [Da]	DeltaM [ppm]	Deltam/z [Da]	Activation Type	MS Order	Isolation Interference [%]	Ion Inject Time [ms]	RT [min]	First Scan	Spectrum File	File ID	Quan Info	XCorr	Contaminant	Percolator q-Value	Percolator PEP	Precursor Abundance	Apex RT [min]
		TRUE	High	Sequest HT (A2)	Unambiguous	[F].ERDISTEIY.[Q]		1	1	QHD43416.1_S2_RBD	QHD43416.1_S2_RBD	0	2	0.5876	0	1	1	563.276	1125.54	1125.54	1.77	0.001	ETD (Electron Transfer Dissociation)	MS2	24.2399	3.256	66.9706	18278	200428_Lumos_(LC1200)_nanoFlex_Ieva_SARS_CoV2_i1_Chy_Chymo_90min_ETD_HCD_2ul.raw	F11		1.94	FALSE	0.0009067	0.1542	8572868608	67.35
		TRUE	High	Sequest HT (A2)	Unambiguous	[F].ERDISTEIY.[Q]		1	1	QHD43416.1_S2_RBD	QHD43416.1_S2_RBD	0	2	0.5426	0	1	1	563.275	1125.54	1125.54	0.47	0.00026	ETD (Electron Transfer Dissociation)	MS2	1.07314	0.085	67.3103	18383	200428_Lumos_(LC1200)_nanoFlex_Ieva_SARS_CoV2_i1_Chy_Chymo_90min_ETD_HCD_2ul.raw	F11		1.88	FALSE	0.0009067	0.1917	8572868608	67.35
		TRUE	High	Sequest HT (A2)	Unambiguous	[F].ERDISTEIY.[Q]		1	1	QHD43416.1_S2_RBD	QHD43416.1_S2_RBD	0	2	0.5187	0	1	1	563.275	1125.54	1125.54	0.69	0.00039	ETD (Electron Transfer Dissociation)	MS2	18.2963	0.105	67.6552	18488	200428_Lumos_(LC1200)_nanoFlex_Ieva_SARS_CoV2_i1_Chy_Chymo_90min_ETD_HCD_2ul.raw	F11		1.87	FALSE	0.002538	0.2977	8572868608	67.35
		TRUE	High	Sequest HT (A2)	Unambiguous	[F].ERDISTEIY.[Q]		1	1	QHD43416.1_S2_RBD	QHD43416.1_S2_RBD	0	2	0.5522	0	1	1	563.275	1125.54	1125.54	0.69	0.00039	ETD (Electron Transfer Dissociation)	MS2	11.7359	0.106	67.9918	18597	200428_Lumos_(LC1200)_nanoFlex_Ieva_SARS_CoV2_i1_Chy_Chymo_90min_ETD_HCD_2ul.raw	F11		2.01	FALSE	0.001755	0.2023	8572868608	67.35
		TRUE	High	Sequest HT (A2)	Unambiguous	[F].ERDISTEIY.[Q]		1	1	QHD43416.1_S2_RBD	QHD43416.1_S2_RBD	0	2	0.6198	0	1	1	563.275	1125.54	1125.54	0.69	0.00039	ETD (Electron Transfer Dissociation)	MS2	3.55338	0.168	68.3494	18714	200428_Lumos_(LC1200)_nanoFlex_Ieva_SARS_CoV2_i1_Chy_Chymo_90min_ETD_HCD_2ul.raw	F11		1.92	FALSE	0	0.1134	8572868608	67.35
		TRUE	High	Sequest HT (A2)	Unambiguous	[F].ERDISTEIY.[Q]		1	1	QHD43416.1_S2_RBD	QHD43416.1_S2_RBD	0	2	0.6051	0	1	1	563.275	1125.54	1125.54	0.69	0.00039	ETD (Electron Transfer Dissociation)	MS2	1.18806	0.231	68.7096	18827	200428_Lumos_(LC1200)_nanoFlex_Ieva_SARS_CoV2_i1_Chy_Chymo_90min_ETD_HCD_2ul.raw	F11		1.95	FALSE	0.0009067	0.1796	8572868608	67.35
		TRUE	High	Sequest HT (A2)	Unambiguous	[F].ERDISTEIY.[Q]		1	1	QHD43416.1_S2_RBD	QHD43416.1_S2_RBD	0	2	0.638	0	1	1	563.275	1125.54	1125.54	1.12	0.00063	ETD (Electron Transfer Dissociation)	MS2	7.82983	1.553	69.0637	18945	200428_Lumos_(LC1200)_nanoFlex_Ieva_SARS_CoV2_i1_Chy_Chymo_90min_ETD_HCD_2ul.raw	F11		2.21	FALSE	0	0.1011	8572868608	67.35
		TRUE	High	Sequest HT (A2)	Unambiguous	[F].ERDISTEIY.[Q]		1	1	QHD43416.1_S2_RBD	QHD43416.1_S2_RBD	0	2	0.6091	0	1	1	563.276	1125.54	1125.54	1.77	0.001	ETD (Electron Transfer Dissociation)	MS2	23.3216	2.77	69.4199	19057	200428_Lumos_(LC1200)_nanoFlex_Ieva_SARS_CoV2_i1_Chy_Chymo_90min_ETD_HCD_2ul.raw	F11		2.2	FALSE	0	0.05257	8572868608	67.35
		TRUE	Medium	Sequest HT (A2)	Ambiguous	[F].ERDISTEIY.[Q]		1	1	QHD43416.1_S2_RBD	QHD43416.1_S2_RBD	0	2	0.3333	0	1	1	563.276	1125.54	1125.54	1.66	0.00094	ETD (Electron Transfer Dissociation)	MS2	53.8585	3.156	69.8381	19193	200428_Lumos_(LC1200)_nanoFlex_Ieva_SARS_CoV2_i1_Chy_Chymo_90min_ETD_HCD_2ul.raw	F11		1.5	FALSE	0.04657	0.61	8572868608	67.35
		TRUE	High	Sequest HT (A2)	Unambiguous	[F].ERDISTEIY.[Q]		1	1	QHD43416.1_S2_RBD	QHD43416.1_S2_RBD	0	2	0.6055	0	1	1	563.276	1125.54	1125.54	1.55	0.00087	ETD (Electron Transfer Dissociation)	MS2	28.5779	4.268	70.2144	19318	200428_Lumos_(LC1200)_nanoFlex_Ieva_SARS_CoV2_i1_Chy_Chymo_90min_ETD_HCD_2ul.raw	F11		2.18	FALSE	0.0009067	0.1556	8572868608	67.35
		TRUE	High	Sequest HT (A2)	Unambiguous	[F].ERDISTEIY.[Q]		1	1	QHD43416.1_S2_RBD	QHD43416.1_S2_RBD	0	2	0.5341	0	1	1	563.276	1125.54	1125.54	1.77	0.001	ETD (Electron Transfer Dissociation)	MS2	11.5229	7.897	70.6345	19452	200428_Lumos_(LC1200)_nanoFlex_Ieva_SARS_CoV2_i1_Chy_Chymo_90min_ETD_HCD_2ul.raw	F11		1.76	FALSE	0.002538	0.3112	93878840	71.18
		TRUE	High	Sequest HT (A2)	Unambiguous	[F].ERDISTEIY.[Q]		1	1	QHD43416.1_S2_RBD	QHD43416.1_S2_RBD	0	2	0.569	0	1	1	563.276	1125.55	1125.54	2.96	0.00167	ETD (Electron Transfer Dissociation)	MS2	29.8903	9.166	70.9342	19536	200428_Lumos_(LC1200)_nanoFlex_Ieva_SARS_CoV2_i1_Chy_Chymo_90min_ETD_HCD_2ul.raw	F11		1.74	FALSE	0.008235	0.4044	93878840	71.18
		TRUE	High	Sequest HT (A2)	Unambiguous	[F].ERDISTEIY.[Q]		1	1	QHD43416.1_S2_RBD	QHD43416.1_S2_RBD	0	2	0.5789	0	1	1	563.276	1125.54	1125.54	1.77	0.001	ETD (Electron Transfer Dissociation)	MS2	31.2595	5.055	71.154	19592	200428_Lumos_(LC1200)_nanoFlex_Ieva_SARS_CoV2_i1_Chy_Chymo_90min_ETD_HCD_2ul.raw	F11		2.09	FALSE	0	0.1276	93878840	71.18
		TRUE	High	Sequest HT (A2)	Unambiguous	[F].ERDISTEIY.[Q]		1	1	QHD43416.1_S2_RBD	QHD43416.1_S2_RBD	0	2	0.5628	0	1	1	563.276	1125.55	1125.54	2.53	0.00142	ETD (Electron Transfer Dissociation)	MS2	31.2682	5.925	71.5496	19707	200428_Lumos_(LC1200)_nanoFlex_Ieva_SARS_CoV2_i1_Chy_Chymo_90min_ETD_HCD_2ul.raw	F11		1.83	FALSE	0.002538	0.2832	93878840	71.18
		TRUE	High	Sequest HT (A2)	Unambiguous	[F].ERDISTEIY.[Q]		1	1	QHD43416.1_S2_RBD	QHD43416.1_S2_RBD	0	2	0.5762	0	1	1	563.276	1125.54	1125.54	1.99	0.00112	ETD (Electron Transfer Dissociation)	MS2	43.8947	7.764	71.7675	19776	200428_Lumos_(LC1200)_nanoFlex_Ieva_SARS_CoV2_i1_Chy_Chymo_90min_ETD_HCD_2ul.raw	F11		2.1	FALSE	0	0.08472	93878840	71.18
		TRUE	High	Sequest HT (A2)	Unambiguous	[F].ERDISTEIY.[Q]		1	1	QHD43416.1_S2_RBD	QHD43416.1_S2_RBD	0	2	0.5782	0	1	1	563.275	1125.54	1125.54	1.12	0.00063	ETD (Electron Transfer Dissociation)	MS2	33.9546	5.422	72.2881	19941	200428_Lumos_(LC1200)_nanoFlex_Ieva_SARS_CoV2_i1_Chy_Chymo_90min_ETD_HCD_2ul.raw	F11		2.11	FALSE	0	0.1168	93878840	71.18
		TRUE	Low	Sequest HT (A14)	Ambiguous	[F].ERDISTEIY.[Q]		1	1	QHD43416.1_S2_RBD	QHD43416.1_S2_RBD	0	2	0.1867	0	1	1	563.276	1125.54	1125.54	1.66	0.00094	ETD (Electron Transfer Dissociation)	MS2	53.8585	3.156	69.8381	19193	200428_Lumos_(LC1200)_nanoFlex_Ieva_SARS_CoV2_i1_Chy_Chymo_90min_ETD_HCD_2ul.raw	F11		1.5	FALSE	0.4123	0.8626	8572868608	67.35
		TRUE	High	Sequest HT (A16)	Unambiguous	[F].ERDISTEIY.[Q]		1	1	QHD43416.1_S2_RBD	QHD43416.1_S2_RBD	0	2	0.5083	0	1	1	563.276	1125.54	1125.54	1.77	0.001	HCD (High Energy Collision Dissociation)	MS2	24.2399	0.239	66.9794	18280	200428_Lumos_(LC1200)_nanoFlex_Ieva_SARS_CoV2_i1_Chy_Chymo_90min_ETD_HCD_2ul.raw	F11		3.01	FALSE	0.002712	0.2122	8572868608	67.35
		TRUE	High	Sequest HT (A16)	Unambiguous	[F].ERDISTEIY.[Q]		1	1	QHD43416.1_S2_RBD	QHD43416.1_S2_RBD	0	2	0.4573	0	1	1	563.275	1125.54	1125.54	0.47	0.00026	HCD (High Energy Collision Dissociation)	MS2	1.07314	0.047	67.3178	18384	200428_Lumos_(LC1200)_nanoFlex_Ieva_SARS_CoV2_i1_Chy_Chymo_90min_ETD_HCD_2ul.raw	F11		2.93	FALSE	0	0.05997	8572868608	67.35
		TRUE	High	Sequest HT (A16)	Unambiguous	[F].ERDISTEIY.[Q]		1	1	QHD43416.1_S2_RBD	QHD43416.1_S2_RBD	0	2	0.4555	0	1	1	563.275	1125.54	1125.54	0.69	0.00039	HCD (High Energy Collision Dissociation)	MS2	18.2963	0.057	67.6635	18490	200428_Lumos_(LC1200)_nanoFlex_Ieva_SARS_CoV2_i1_Chy_Chymo_90min_ETD_HCD_2ul.raw	F11		2.92	FALSE	0	0.05573	8572868608	67.35
		TRUE	High	Sequest HT (A16)	Unambiguous	[F].ERDISTEIY.[Q]		1	1	QHD43416.1_S2_RBD	QHD43416.1_S2_RBD	0	2	0.4759	0	1	1	563.275	1125.54	1125.54	0.69	0.00039	HCD (High Energy Collision Dissociation)	MS2	11.7359	0.061	68.0014	18599	200428_Lumos_(LC1200)_nanoFlex_Ieva_SARS_CoV2_i1_Chy_Chymo_90min_ETD_HCD_2ul.raw	F11		2.9	FALSE	0.0009362	0.1385	8572868608	67.35
		TRUE	High	Sequest HT (A16)	Unambiguous	[F].ERDISTEIY.[Q]		1	1	QHD43416.1_S2_RBD	QHD43416.1_S2_RBD	0	2	0.4394	0	1	1	563.275	1125.54	1125.54	0.69	0.00039	HCD (High Energy Collision Dissociation)	MS2	3.55338	0.096	68.3589	18716	200428_Lumos_(LC1200)_nanoFlex_Ieva_SARS_CoV2_i1_Chy_Chymo_90min_ETD_HCD_2ul.raw	F11		2.89	FALSE	0	0.06013	8572868608	67.35
		TRUE	High	Sequest HT (A16)	Unambiguous	[F].ERDISTEIY.[Q]		1	1	QHD43416.1_S2_RBD	QHD43416.1_S2_RBD	0	2	0.4388	0	1	1	563.275	1125.54	1125.54	0.69	0.00039	HCD (High Energy Collision Dissociation)	MS2	1.18806	0.142	68.7196	18829	200428_Lumos_(LC1200)_nanoFlex_Ieva_SARS_CoV2_i1_Chy_Chymo_90min_ETD_HCD_2ul.raw	F11		2.94	FALSE	0.0009362	0.1407	8572868608	67.35
		TRUE	High	Sequest HT (A16)	Unambiguous	[F].ERDISTEIY.[Q]		1	1	QHD43416.1_S2_RBD	QHD43416.1_S2_RBD	0	2	0.4311	0	1	1	563.275	1125.54	1125.54	1.12	0.00063	HCD (High Energy Collision Dissociation)	MS2	7.82983	0.956	69.0737	18947	200428_Lumos_(LC1200)_nanoFlex_Ieva_SARS_CoV2_i1_Chy_Chymo_90min_ETD_HCD_2ul.raw	F11		2.83	FALSE	0.0009362	0.1318	8572868608	67.35
		TRUE	High	Sequest HT (A16)	Unambiguous	[F].ERDISTEIY.[Q]		1	1	QHD43416.1_S2_RBD	QHD43416.1_S2_RBD	0	2	0.3799	0	1	1	563.276	1125.54	1125.54	1.77	0.001	HCD (High Energy Collision Dissociation)	MS2	23.3216	1.428	69.43	19059	200428_Lumos_(LC1200)_nanoFlex_Ieva_SARS_CoV2_i1_Chy_Chymo_90min_ETD_HCD_2ul.raw	F11		2.29	FALSE	0.002712	0.213	8572868608	67.35
		TRUE	Medium	Sequest HT (A16)	Ambiguous	[F].ERDISTEIY.[Q]		1	1	QHD43416.1_S2_RBD	QHD43416.1_S2_RBD	0	2	0.2454	0	1	1	563.276	1125.54	1125.54	1.66	0.00094	HCD (High Energy Collision Dissociation)	MS2	53.8585	2.123	69.8475	19195	200428_Lumos_(LC1200)_nanoFlex_Ieva_SARS_CoV2_i1_Chy_Chymo_90min_ETD_HCD_2ul.raw	F11		2.16	FALSE	0.04283	0.5147	8572868608	67.35
		TRUE	High	Sequest HT (A16)	Unambiguous	[F].ERDISTEIY.[Q]		1	1	QHD43416.1_S2_RBD	QHD43416.1_S2_RBD	0	2	0.3687	0	1	1	563.276	1125.54	1125.54	1.55	0.00087	HCD (High Energy Collision Dissociation)	MS2	28.5779	2.216	70.2239	19320	200428_Lumos_(LC1200)_nanoFlex_Ieva_SARS_CoV2_i1_Chy_Chymo_90min_ETD_HCD_2ul.raw	F11		2.17	FALSE	0.00437	0.2555	8572868608	67.35
		TRUE	Medium	Sequest HT (A16)	Ambiguous	[F].ERDISTEIY.[Q]		1	1	QHD43416.1_S2_RBD	QHD43416.1_S2_RBD	0	2	0.2736	0	1	1	563.276	1125.54	1125.54	1.77	0.001	HCD (High Energy Collision Dissociation)	MS2	11.5229	3.082	70.6437	19454	200428_Lumos_(LC1200)_nanoFlex_Ieva_SARS_CoV2_i1_Chy_Chymo_90min_ETD_HCD_2ul.raw	F11		2.01	FALSE	0.01979	0.413
		TRUE	Low	Sequest HT (A16)	Ambiguous	[F].ERDISTEIY.[Q]		1	1	QHD43416.1_S2_RBD	QHD43416.1_S2_RBD	0	2	0.268	0	1	1	563.276	1125.55	1125.54	2.96	0.00167	HCD (High Energy Collision Dissociation)	MS2	29.8903	5.683	70.9443	19538	200428_Lumos_(LC1200)_nanoFlex_Ieva_SARS_CoV2_i1_Chy_Chymo_90min_ETD_HCD_2ul.raw	F11		1.53	FALSE	0.7086	1
		TRUE	Medium	Sequest HT (A16)	Ambiguous	[F].ERDISTEIY.[Q]		1	1	QHD43416.1_S2_RBD	QHD43416.1_S2_RBD	0	2	0.3095	0	1	1	563.276	1125.54	1125.54	1.77	0.001	HCD (High Energy Collision Dissociation)	MS2	31.2595	2.603	71.162	19593	200428_Lumos_(LC1200)_nanoFlex_Ieva_SARS_CoV2_i1_Chy_Chymo_90min_ETD_HCD_2ul.raw	F11		2.1	FALSE	0.04026	0.5003	93878840	71.18
		TRUE	Medium	Sequest HT (A16)	Ambiguous	[F].ERDISTEIY.[Q]		1	1	QHD43416.1_S2_RBD	QHD43416.1_S2_RBD	0	2	0.3439	0	1	1	563.276	1125.55	1125.54	2.53	0.00142	HCD (High Energy Collision Dissociation)	MS2	31.2682	3.282	71.5595	19709	200428_Lumos_(LC1200)_nanoFlex_Ieva_SARS_CoV2_i1_Chy_Chymo_90min_ETD_HCD_2ul.raw	F11		2.21	FALSE	0.04728	0.5591	93878840	71.18
		TRUE	Low	Sequest HT (A16)	Ambiguous	[F].ERDISTEIY.[Q]		1	1	QHD43416.1_S2_RBD	QHD43416.1_S2_RBD	0	2	0.2126	0	1	1	563.276	1125.54	1125.54	1.99	0.00112	HCD (High Energy Collision Dissociation)	MS2	43.8947	3.568	71.7772	19778	200428_Lumos_(LC1200)_nanoFlex_Ieva_SARS_CoV2_i1_Chy_Chymo_90min_ETD_HCD_2ul.raw	F11		1.74	FALSE	0.6783	1	93878840	71.18
		TRUE	High	Sequest HT (A16)	Unambiguous	[F].ERDISTEIY.[Q]		1	1	QHD43416.1_S2_RBD	QHD43416.1_S2_RBD	0	2	0.3073	0	1	1	563.275	1125.54	1125.54	1.12	0.00063	HCD (High Energy Collision Dissociation)	MS2	33.9546	4.067	72.2966	19943	200428_Lumos_(LC1200)_nanoFlex_Ieva_SARS_CoV2_i1_Chy_Chymo_90min_ETD_HCD_2ul.raw	F11		2.18	FALSE	0.00437	0.2771	93878840	71.18
		TRUE	Low	Sequest HT (A18)	Ambiguous	[F].ERDISTEIY.[Q]		1	1	QHD43416.1_S2_RBD	QHD43416.1_S2_RBD	0	2	0.1898	0	1	1	563.276	1125.54	1125.54	1.66	0.00094	HCD (High Energy Collision Dissociation)	MS2	53.8585	2.123	69.8475	19195	200428_Lumos_(LC1200)_nanoFlex_Ieva_SARS_CoV2_i1_Chy_Chymo_90min_ETD_HCD_2ul.raw	F11		2.16	FALSE	0.5252	0.9401	8572868608	67.35
		TRUE	Low	Sequest HT (A18)	Ambiguous	[F].ERDISTEIY.[Q]		1	1	QHD43416.1_S2_RBD	QHD43416.1_S2_RBD	0	2	0.1791	0	1	1	563.276	1125.54	1125.54	1.77	0.001	HCD (High Energy Collision Dissociation)	MS2	11.5229	3.082	70.6437	19454	200428_Lumos_(LC1200)_nanoFlex_Ieva_SARS_CoV2_i1_Chy_Chymo_90min_ETD_HCD_2ul.raw	F11		2.01	FALSE	0.597	0.9677
		TRUE	Low	Sequest HT (A18)	Ambiguous	[F].ERDISTEIY.[Q]		1	1	QHD43416.1_S2_RBD	QHD43416.1_S2_RBD	0	2	0.1111	0	1	1	563.276	1125.55	1125.54	2.96	0.00167	HCD (High Energy Collision Dissociation)	MS2	29.8903	5.683	70.9443	19538	200428_Lumos_(LC1200)_nanoFlex_Ieva_SARS_CoV2_i1_Chy_Chymo_90min_ETD_HCD_2ul.raw	F11		1.53	FALSE	0.8223	1
		TRUE	Low	Sequest HT (A18)	Ambiguous	[F].ERDISTEIY.[Q]		1	1	QHD43416.1_S2_RBD	QHD43416.1_S2_RBD	0	2	0.2095	0	1	1	563.276	1125.54	1125.54	1.77	0.001	HCD (High Energy Collision Dissociation)	MS2	31.2595	2.603	71.162	19593	200428_Lumos_(LC1200)_nanoFlex_Ieva_SARS_CoV2_i1_Chy_Chymo_90min_ETD_HCD_2ul.raw	F11		2.1	FALSE	0.7252	1	93878840	71.18
		TRUE	Low	Sequest HT (A18)	Ambiguous	[F].ERDISTEIY.[Q]		1	1	QHD43416.1_S2_RBD	QHD43416.1_S2_RBD	0	2	0.2308	0	1	1	563.276	1125.55	1125.54	2.53	0.00142	HCD (High Energy Collision Dissociation)	MS2	31.2682	3.282	71.5595	19709	200428_Lumos_(LC1200)_nanoFlex_Ieva_SARS_CoV2_i1_Chy_Chymo_90min_ETD_HCD_2ul.raw	F11		2.21	FALSE	0.7258	1	93878840	71.18
		TRUE	Low	Sequest HT (A18)	Ambiguous	[F].ERDISTEIY.[Q]		1	1	QHD43416.1_S2_RBD	QHD43416.1_S2_RBD	0	2	0.1092	0	1	1	563.276	1125.54	1125.54	1.99	0.00112	HCD (High Energy Collision Dissociation)	MS2	43.8947	3.568	71.7772	19778	200428_Lumos_(LC1200)_nanoFlex_Ieva_SARS_CoV2_i1_Chy_Chymo_90min_ETD_HCD_2ul.raw	F11		1.74	FALSE	0.7616	1	93878840	71.18
	TRUE	High	[D].EVRQIAPGQTGKIADY.[N]			FALSE	0.000995996	0	1	1	4	QHD43416.1_S2_RBD	QHD43416.1_S2_RBD [233-248]	0	1745.92	68738182		High	High	0	0.00115	6.7	65.75
		Checked	Confidence	Identifying Node	PSM Ambiguity	Annotated Sequence	Modifications	# Protein Groups	# Proteins	Master Protein Accessions	Protein Accessions	# Missed Cleavages	Charge	DeltaScore	DeltaCn	Rank	Search Engine Rank	m/z [Da]	MH+ [Da]	Theo. MH+ [Da]	DeltaM [ppm]	Deltam/z [Da]	Activation Type	MS Order	Isolation Interference [%]	Ion Inject Time [ms]	RT [min]	First Scan	Spectrum File	File ID	Quan Info	XCorr	Contaminant	Percolator q-Value	Percolator PEP	Precursor Abundance	Apex RT [min]
		TRUE	High	Sequest HT (A14)	Ambiguous	[D].EVRQIAPGQTGKIADY.[N]		1	1	QHD43416.1_S2_RBD	QHD43416.1_S2_RBD	0	3	0.6597	0	1	1	582.644	1745.92	1745.92	-0.6	-0.00035	ETD (Electron Transfer Dissociation)	MS2	18.0789	10.598	65.7145	17872	200428_Lumos_(LC1200)_nanoFlex_Ieva_SARS_CoV2_i1_Chy_Chymo_90min_ETD_HCD_2ul.raw	F11		6.7	FALSE	0	0.00115	46378844	65.75
		TRUE	High	Sequest HT (A14)	Ambiguous	[D].EVRQIAPGQTGKIADY.[N]		1	1	QHD43416.1_S2_RBD	QHD43416.1_S2_RBD	0	2	0.6537	0	1	1	873.463	1745.92	1745.92	-0.1	-9e-05	ETD (Electron Transfer Dissociation)	MS2	44.0392	9.639	65.7254	17876	200428_Lumos_(LC1200)_nanoFlex_Ieva_SARS_CoV2_i1_Chy_Chymo_90min_ETD_HCD_2ul.raw	F11		2.83	FALSE	0	0.01393	22359338	65.74
		TRUE	High	Sequest HT (A18)	Ambiguous	[D].EVRQIAPGQTGKIADY.[N]		1	1	QHD43416.1_S2_RBD	QHD43416.1_S2_RBD	0	3	0.5614	0	1	1	582.644	1745.92	1745.92	-0.6	-0.00035	HCD (High Energy Collision Dissociation)	MS2	18.0789	3.325	65.7236	17874	200428_Lumos_(LC1200)_nanoFlex_Ieva_SARS_CoV2_i1_Chy_Chymo_90min_ETD_HCD_2ul.raw	F11		4.56	FALSE	0	0.03203	46378844	65.75
		TRUE	High	Sequest HT (A18)	Ambiguous	[D].EVRQIAPGQTGKIADY.[N]		1	1	QHD43416.1_S2_RBD	QHD43416.1_S2_RBD	0	2	0.6701	0	1	1	873.463	1745.92	1745.92	-0.1	-9e-05	HCD (High Energy Collision Dissociation)	MS2	44.0392	6.934	65.7363	17878	200428_Lumos_(LC1200)_nanoFlex_Ieva_SARS_CoV2_i1_Chy_Chymo_90min_ETD_HCD_2ul.raw	F11		3.91	FALSE	0	0.006807	22359338	65.74
	TRUE	High	[L].FRKSNLKPF.[E]			FALSE	0.0390101	0	1	1	3	QHD43416.1_S2_RBD	QHD43416.1_S2_RBD [283-291]	2	1136.66	11454643		High	High	0	0.08181	3.27	47.88
		Checked	Confidence	Identifying Node	PSM Ambiguity	Annotated Sequence	Modifications	# Protein Groups	# Proteins	Master Protein Accessions	Protein Accessions	# Missed Cleavages	Charge	DeltaScore	DeltaCn	Rank	Search Engine Rank	m/z [Da]	MH+ [Da]	Theo. MH+ [Da]	DeltaM [ppm]	Deltam/z [Da]	Activation Type	MS Order	Isolation Interference [%]	Ion Inject Time [ms]	RT [min]	First Scan	Spectrum File	File ID	Quan Info	XCorr	Contaminant	Percolator q-Value	Percolator PEP	Precursor Abundance	Apex RT [min]
		TRUE	High	Sequest HT (A2)	Unambiguous	[L].FRKSNLKPF.[E]		1	1	QHD43416.1_S2_RBD	QHD43416.1_S2_RBD	2	3	0.7339	0	1	1	379.558	1136.66	1136.66	1.36	0.00051	ETD (Electron Transfer Dissociation)	MS2	13.7733	27.234	47.8137	12494	200428_Lumos_(LC1200)_nanoFlex_Ieva_SARS_CoV2_i1_Chy_Chymo_90min_ETD_HCD_2ul.raw	F11		3.27	FALSE	0	0.08181	11454643	47.88
		TRUE	Low	Sequest HT (A16)	Ambiguous	[L].FRKSNLKPF.[E]		1	1	QHD43416.1_S2_RBD	QHD43416.1_S2_RBD	2	3	0.4023	0	1	1	379.558	1136.66	1136.66	1.36	0.00051	HCD (High Energy Collision Dissociation)	MS2	13.7733	15.166	47.8246	12496	200428_Lumos_(LC1200)_nanoFlex_Ieva_SARS_CoV2_i1_Chy_Chymo_90min_ETD_HCD_2ul.raw	F11		2.66	FALSE	0.1462	0.7588	11454643	47.88
		TRUE	Low	Sequest HT (A18)	Ambiguous	[L].FRKSNLKPF.[E]		1	1	QHD43416.1_S2_RBD	QHD43416.1_S2_RBD	2	3	0.3835	0	1	1	379.558	1136.66	1136.66	1.36	0.00051	HCD (High Energy Collision Dissociation)	MS2	13.7733	15.166	47.8246	12496	200428_Lumos_(LC1200)_nanoFlex_Ieva_SARS_CoV2_i1_Chy_Chymo_90min_ETD_HCD_2ul.raw	F11		2.66	FALSE	0.4678	0.9135	11454643	47.88
	TRUE	High	[R].GDEVRQIAPGQTGKIADY.[N]			FALSE	0.00231704	0	1	1	2	QHD43416.1_S2_RBD	QHD43416.1_S2_RBD [231-248]	0	1917.97	21822198		High	High	0	0.004937	4.23	72.06
		Checked	Confidence	Identifying Node	PSM Ambiguity	Annotated Sequence	Modifications	# Protein Groups	# Proteins	Master Protein Accessions	Protein Accessions	# Missed Cleavages	Charge	DeltaScore	DeltaCn	Rank	Search Engine Rank	m/z [Da]	MH+ [Da]	Theo. MH+ [Da]	DeltaM [ppm]	Deltam/z [Da]	Activation Type	MS Order	Isolation Interference [%]	Ion Inject Time [ms]	RT [min]	First Scan	Spectrum File	File ID	Quan Info	XCorr	Contaminant	Percolator q-Value	Percolator PEP	Precursor Abundance	Apex RT [min]
		TRUE	High	Sequest HT (A14)	Ambiguous	[R].GDEVRQIAPGQTGKIADY.[N]		1	1	QHD43416.1_S2_RBD	QHD43416.1_S2_RBD	0	2	0.7298	0	1	1	959.488	1917.97	1917.97	1.14	0.0011	ETD (Electron Transfer Dissociation)	MS2	20.094	11.74	72.0586	19864	200428_Lumos_(LC1200)_nanoFlex_Ieva_SARS_CoV2_i1_Chy_Chymo_90min_ETD_HCD_2ul.raw	F11		3.96	FALSE	0	0.006057	21822198	72.06
		TRUE	High	Sequest HT (A18)	Ambiguous	[R].GDEVRQIAPGQTGKIADY.[N]		1	1	QHD43416.1_S2_RBD	QHD43416.1_S2_RBD	0	2	0.6619	0	1	1	959.488	1917.97	1917.97	1.14	0.0011	HCD (High Energy Collision Dissociation)	MS2	20.094	11.901	72.0674	19866	200428_Lumos_(LC1200)_nanoFlex_Ieva_SARS_CoV2_i1_Chy_Chymo_90min_ETD_HCD_2ul.raw	F11		4.23	FALSE	0	0.004937	21822198	72.06
	TRUE	High	[F].GEVFNATRF.[A]	1xDeamidated [N5]		FALSE	0.00666146	0	1	1	4	QHD43416.1_S2_RBD	QHD43416.1_S2_RBD [166-174]	1	1041.5	1184294144		High	High	0	0.01289	2.79	86.81
		Checked	Confidence	Identifying Node	PSM Ambiguity	Annotated Sequence	Modifications	# Protein Groups	# Proteins	Master Protein Accessions	Protein Accessions	# Missed Cleavages	Charge	DeltaScore	DeltaCn	Rank	Search Engine Rank	m/z [Da]	MH+ [Da]	Theo. MH+ [Da]	DeltaM [ppm]	Deltam/z [Da]	Activation Type	MS Order	Isolation Interference [%]	Ion Inject Time [ms]	RT [min]	First Scan	Spectrum File	File ID	Quan Info	XCorr	Contaminant	Percolator q-Value	Percolator PEP	Precursor Abundance	Apex RT [min]
		TRUE	High	Sequest HT (A2)	Unambiguous	[F].GEVFnATRF.[A]	N5(Deamidated)	1	1	QHD43416.1_S2_RBD	QHD43416.1_S2_RBD	1	2	0.5	0	1	1	521.254	1041.5	1041.5	-0.18	-9e-05	ETD (Electron Transfer Dissociation)	MS2	7.29352	11.803	86.648	24573	200428_Lumos_(LC1200)_nanoFlex_Ieva_SARS_CoV2_i1_Chy_Chymo_90min_ETD_HCD_2ul.raw	F11		1.4	FALSE	0.008235	0.3973	1184294144	86.81
		TRUE	High	Sequest HT (A2)	Unambiguous	[F].GEVFnATRF.[A]	N5(Deamidated)	1	1	QHD43416.1_S2_RBD	QHD43416.1_S2_RBD	1	2	0.5538	0	1	1	521.254	1041.5	1041.5	0.76	0.0004	ETD (Electron Transfer Dissociation)	MS2	0.818618	0.594	87.0316	24698	200428_Lumos_(LC1200)_nanoFlex_Ieva_SARS_CoV2_i1_Chy_Chymo_90min_ETD_HCD_2ul.raw	F11		1.95	FALSE	0.009778	0.4418	1184294144	86.81
		TRUE	High	Sequest HT (A16)	Unambiguous	[F].GEVFnATRF.[A]	N5(Deamidated)	1	1	QHD43416.1_S2_RBD	QHD43416.1_S2_RBD	1	2	0.5771	0	1	1	521.254	1041.5	1041.5	-0.18	-9e-05	HCD (High Energy Collision Dissociation)	MS2	7.29352	1.235	86.6571	24575	200428_Lumos_(LC1200)_nanoFlex_Ieva_SARS_CoV2_i1_Chy_Chymo_90min_ETD_HCD_2ul.raw	F11		2.79	FALSE	0	0.01289	1184294144	86.81
		TRUE	High	Sequest HT (A16)	Unambiguous	[F].GEVFnATRF.[A]	N5(Deamidated)	1	1	QHD43416.1_S2_RBD	QHD43416.1_S2_RBD	1	2	0.6571	0	1	1	521.254	1041.5	1041.5	0.76	0.0004	HCD (High Energy Collision Dissociation)	MS2	0.818618	0.389	87.0415	24700	200428_Lumos_(LC1200)_nanoFlex_Ieva_SARS_CoV2_i1_Chy_Chymo_90min_ETD_HCD_2ul.raw	F11		2.45	FALSE	0	0.008847	1184294144	86.81
	TRUE	High	[F].GEVFNATRFASVY.[A]	1xHexNAc [T/Y]	QHD43416.1_S2_RBD 1xHexNAc [T/Y]	FALSE	0.0143493	0	1	1	3	QHD43416.1_S2_RBD	QHD43416.1_S2_RBD [166-178]	2	1663.8	12327958		High	High	0	0.06869	3.08	105.38
		Checked	Confidence	Identifying Node	PSM Ambiguity	Annotated Sequence	Modifications	# Protein Groups	# Proteins	Master Protein Accessions	Protein Accessions	# Missed Cleavages	Charge	DeltaScore	DeltaCn	Rank	Search Engine Rank	m/z [Da]	MH+ [Da]	Theo. MH+ [Da]	DeltaM [ppm]	Deltam/z [Da]	Activation Type	MS Order	Isolation Interference [%]	Ion Inject Time [ms]	RT [min]	First Scan	Spectrum File	File ID	Quan Info	XCorr	Contaminant	Percolator q-Value	Percolator PEP	Precursor Abundance	Apex RT [min]
		TRUE	High	Sequest HT (A2)	Unambiguous	[F].GEVFNAtRFASVY.[A]	T7(HexNAc)	1	1	QHD43416.1_S2_RBD	QHD43416.1_S2_RBD	2	2	0.4774	0	1	1	832.403	1663.8	1663.8	1	0.00084	ETD (Electron Transfer Dissociation)	MS2	13.8361	12.316	105.337	30593	200428_Lumos_(LC1200)_nanoFlex_Ieva_SARS_CoV2_i1_Chy_Chymo_90min_ETD_HCD_2ul.raw	F11		2.43	FALSE	0	0.03421	12327958	105.38
		TRUE	High	Sequest HT (A16)	Ambiguous	[F].GEVFNATRFASVy.[A]	Y13(HexNAc)	1	1	QHD43416.1_S2_RBD	QHD43416.1_S2_RBD	2	2	0.0422	0	1	1	832.403	1663.8	1663.8	1	0.00084	HCD (High Energy Collision Dissociation)	MS2	13.8361	11.068	105.347	30595	200428_Lumos_(LC1200)_nanoFlex_Ieva_SARS_CoV2_i1_Chy_Chymo_90min_ETD_HCD_2ul.raw	F11		3.08	FALSE	0	0.06869	12327958	105.38
		TRUE	High	Sequest HT (A16)	Ambiguous	[F].GEVFNAtRFASVY.[A]	T7(HexNAc)	1	1	QHD43416.1_S2_RBD	QHD43416.1_S2_RBD	2	2		0.0422	2	2	832.403	1663.8	1663.8	1	0.00084	HCD (High Energy Collision Dissociation)	MS2	13.8361	11.068	105.347	30595	200428_Lumos_(LC1200)_nanoFlex_Ieva_SARS_CoV2_i1_Chy_Chymo_90min_ETD_HCD_2ul.raw	F11		2.95	FALSE	0.0009362	0.08133	12327958	105.38
	TRUE	High	[Y].GFQPTNGVGY.[Q]			FALSE	0.0167471	0	1	1	6	QHD43416.1_S2_RBD	QHD43416.1_S2_RBD [323-332]	1	1039.48	620304576		High	High	0	0.03931	2.17	78.43
		Checked	Confidence	Identifying Node	PSM Ambiguity	Annotated Sequence	Modifications	# Protein Groups	# Proteins	Master Protein Accessions	Protein Accessions	# Missed Cleavages	Charge	DeltaScore	DeltaCn	Rank	Search Engine Rank	m/z [Da]	MH+ [Da]	Theo. MH+ [Da]	DeltaM [ppm]	Deltam/z [Da]	Activation Type	MS Order	Isolation Interference [%]	Ion Inject Time [ms]	RT [min]	First Scan	Spectrum File	File ID	Quan Info	XCorr	Contaminant	Percolator q-Value	Percolator PEP	Precursor Abundance	Apex RT [min]
		TRUE	High	Sequest HT (A2)	Unambiguous	[Y].GFQPTNGVGY.[Q]		1	1	QHD43416.1_S2_RBD	QHD43416.1_S2_RBD	1	2	0.6682	0	1	1	520.246	1039.48	1039.48	-0.39	-0.0002	ETD (Electron Transfer Dissociation)	MS2	33.3171	19.118	78.32	21869	200428_Lumos_(LC1200)_nanoFlex_Ieva_SARS_CoV2_i1_Chy_Chymo_90min_ETD_HCD_2ul.raw	F11		2.17	FALSE	0	0.03931	620304576	78.43
		TRUE	High	Sequest HT (A2)	Unambiguous	[Y].GFQPTNGVGY.[Q]		1	1	QHD43416.1_S2_RBD	QHD43416.1_S2_RBD	1	2	0.43	0	1	1	520.246	1039.48	1039.48	0.55	0.00029	ETD (Electron Transfer Dissociation)	MS2	11.3042	10.278	78.7095	21993	200428_Lumos_(LC1200)_nanoFlex_Ieva_SARS_CoV2_i1_Chy_Chymo_90min_ETD_HCD_2ul.raw	F11		2	FALSE	0	0.1322	620304576	78.43
		TRUE	Low	Sequest HT (A16)	Ambiguous	[Y].GFQPTNGVGY.[Q]		1	1	QHD43416.1_S2_RBD	QHD43416.1_S2_RBD	1	2	0.5736	0	1	1	520.246	1039.48	1039.48	-0.39	-0.0002	HCD (High Energy Collision Dissociation)	MS2	33.3171	2.541	78.3298	21871	200428_Lumos_(LC1200)_nanoFlex_Ieva_SARS_CoV2_i1_Chy_Chymo_90min_ETD_HCD_2ul.raw	F11		2.65	FALSE	0.08158	0.6532	620304576	78.43
		TRUE	Low	Sequest HT (A16)	Ambiguous	[Y].GFQPTNGVGY.[Q]		1	1	QHD43416.1_S2_RBD	QHD43416.1_S2_RBD	1	2	0.5502	0	1	1	520.246	1039.48	1039.48	0.55	0.00029	HCD (High Energy Collision Dissociation)	MS2	11.3042	10.534	78.7205	21995	200428_Lumos_(LC1200)_nanoFlex_Ieva_SARS_CoV2_i1_Chy_Chymo_90min_ETD_HCD_2ul.raw	F11		2.29	FALSE	0.07513	0.6458	620304576	78.43
		TRUE	Low	Sequest HT (A18)	Ambiguous	[Y].GFQPTNGVGY.[Q]		1	1	QHD43416.1_S2_RBD	QHD43416.1_S2_RBD	1	2	0.2189	0	1	1	520.246	1039.48	1039.48	-0.39	-0.0002	HCD (High Energy Collision Dissociation)	MS2	33.3171	2.541	78.3298	21871	200428_Lumos_(LC1200)_nanoFlex_Ieva_SARS_CoV2_i1_Chy_Chymo_90min_ETD_HCD_2ul.raw	F11		2.65	FALSE	0.6307	0.98	620304576	78.43
		TRUE	Low	Sequest HT (A18)	Ambiguous	[Y].GFQPTNGVGY.[Q]		1	1	QHD43416.1_S2_RBD	QHD43416.1_S2_RBD	1	2	0.2882	0	1	1	520.246	1039.48	1039.48	0.55	0.00029	HCD (High Energy Collision Dissociation)	MS2	11.3042	10.534	78.7205	21995	200428_Lumos_(LC1200)_nanoFlex_Ieva_SARS_CoV2_i1_Chy_Chymo_90min_ETD_HCD_2ul.raw	F11		2.29	FALSE	0.1858	0.7419	620304576	78.43
	TRUE	High	[Y].GFQPTNGVGY.[Q]	1xDeamidated [N6]		FALSE	0.0263307	0	1	1	11	QHD43416.1_S2_RBD	QHD43416.1_S2_RBD [323-332]	1	1040.47	820477658		High	High	0.005195	0.2907	2.77	80.74
		Checked	Confidence	Identifying Node	PSM Ambiguity	Annotated Sequence	Modifications	# Protein Groups	# Proteins	Master Protein Accessions	Protein Accessions	# Missed Cleavages	Charge	DeltaScore	DeltaCn	Rank	Search Engine Rank	m/z [Da]	MH+ [Da]	Theo. MH+ [Da]	DeltaM [ppm]	Deltam/z [Da]	Activation Type	MS Order	Isolation Interference [%]	Ion Inject Time [ms]	RT [min]	First Scan	Spectrum File	File ID	Quan Info	XCorr	Contaminant	Percolator q-Value	Percolator PEP	Precursor Abundance	Apex RT [min]
		TRUE	High	Sequest HT (A2)	Unambiguous	[Y].GFQPTnGVGY.[Q]	N6(Deamidated)	1	1	QHD43416.1_S2_RBD	QHD43416.1_S2_RBD	1	2	0.4359	0	1	1	520.739	1040.47	1040.47	1.37	0.00071	ETD (Electron Transfer Dissociation)	MS2	0	9.123	80.5877	22610	200428_Lumos_(LC1200)_nanoFlex_Ieva_SARS_CoV2_i1_Chy_Chymo_90min_ETD_HCD_2ul.raw	F11		1.95	FALSE	0	0.05868	571121536	80.74
		TRUE	High	Sequest HT (A2)	Unambiguous	[Y].GFQPTnGVGY.[Q]	N6(Deamidated)	1	1	QHD43416.1_S2_RBD	QHD43416.1_S2_RBD	1	2	0.4195	0	1	1	520.738	1040.47	1040.47	0.43	0.00022	ETD (Electron Transfer Dissociation)	MS2	0.95979	1.563	80.9494	22727	200428_Lumos_(LC1200)_nanoFlex_Ieva_SARS_CoV2_i1_Chy_Chymo_90min_ETD_HCD_2ul.raw	F11		1.74	FALSE	0.0009067	0.1754	571121536	80.74
		TRUE	High	Sequest HT (A2)	Unambiguous	[Y].GFQPTnGVGY.[Q]	N6(Deamidated)	1	1	QHD43416.1_S2_RBD	QHD43416.1_S2_RBD	1	2	0.5344	0	1	1	520.738	1040.47	1040.47	0.43	0.00022	ETD (Electron Transfer Dissociation)	MS2	43.9098	57.939	81.9466	23048	200428_Lumos_(LC1200)_nanoFlex_Ieva_SARS_CoV2_i1_Chy_Chymo_90min_ETD_HCD_2ul.raw	F11		1.89	FALSE	0	0.1475	22625034	82.06
		TRUE	High	Sequest HT (A2)	Unambiguous	[Y].GFQPTnGVGY.[Q]	N6(Deamidated)	1	1	QHD43416.1_S2_RBD	QHD43416.1_S2_RBD	1	2	0.448	0	1	1	520.738	1040.47	1040.47	0.43	0.00022	ETD (Electron Transfer Dissociation)	MS2	1.78162	2.312	83.7222	23621	200428_Lumos_(LC1200)_nanoFlex_Ieva_SARS_CoV2_i1_Chy_Chymo_90min_ETD_HCD_2ul.raw	F11		2.21	FALSE	0.0009067	0.1545	226731088	83.74
		TRUE	Medium	Sequest HT (A16)	Ambiguous	[Y].GFQPTnGVGY.[Q]	N6(Deamidated)	1	1	QHD43416.1_S2_RBD	QHD43416.1_S2_RBD	1	2	0.4252	0	1	1	520.739	1040.47	1040.47	1.37	0.00071	HCD (High Energy Collision Dissociation)	MS2	0	1.511	80.5967	22612	200428_Lumos_(LC1200)_nanoFlex_Ieva_SARS_CoV2_i1_Chy_Chymo_90min_ETD_HCD_2ul.raw	F11		2.54	FALSE	0.01102	0.3552	571121536	80.74
		TRUE	High	Sequest HT (A16)	Unambiguous	[Y].GFQPTnGVGY.[Q]	N6(Deamidated)	1	1	QHD43416.1_S2_RBD	QHD43416.1_S2_RBD	1	2	0.4801	0	1	1	520.738	1040.47	1040.47	0.43	0.00022	HCD (High Energy Collision Dissociation)	MS2	0.95979	1.02	80.9585	22729	200428_Lumos_(LC1200)_nanoFlex_Ieva_SARS_CoV2_i1_Chy_Chymo_90min_ETD_HCD_2ul.raw	F11		2.77	FALSE	0.005195	0.2907	571121536	80.74
		TRUE	Medium	Sequest HT (A16)	Ambiguous	[Y].GFQPTnGVGY.[Q]	N6(Deamidated)	1	1	QHD43416.1_S2_RBD	QHD43416.1_S2_RBD	1	2	0.296	0	1	1	520.738	1040.47	1040.47	0.43	0.00022	HCD (High Energy Collision Dissociation)	MS2	43.9098	24.25	81.9557	23050	200428_Lumos_(LC1200)_nanoFlex_Ieva_SARS_CoV2_i1_Chy_Chymo_90min_ETD_HCD_2ul.raw	F11		2.5	FALSE	0.04026	0.5007	22625034	82.06
		TRUE	Medium	Sequest HT (A16)	Ambiguous	[Y].GFQPTnGVGY.[Q]	N6(Deamidated)	1	1	QHD43416.1_S2_RBD	QHD43416.1_S2_RBD	1	2	0.4299	0	1	1	520.738	1040.47	1040.47	0.43	0.00022	HCD (High Energy Collision Dissociation)	MS2	1.78162	0.61	83.7326	23623	200428_Lumos_(LC1200)_nanoFlex_Ieva_SARS_CoV2_i1_Chy_Chymo_90min_ETD_HCD_2ul.raw	F11		2.21	FALSE	0.01346	0.3727	226731088	83.74
		TRUE	Low	Sequest HT (A18)	Ambiguous	[Y].GFQPTnGVGY.[Q]	N6(Deamidated)	1	1	QHD43416.1_S2_RBD	QHD43416.1_S2_RBD	1	2	0.2953	0	1	1	520.739	1040.47	1040.47	1.37	0.00071	HCD (High Energy Collision Dissociation)	MS2	0	1.511	80.5967	22612	200428_Lumos_(LC1200)_nanoFlex_Ieva_SARS_CoV2_i1_Chy_Chymo_90min_ETD_HCD_2ul.raw	F11		2.54	FALSE	0.08187	0.6181	571121536	80.74
		TRUE	Low	Sequest HT (A18)	Ambiguous	[Y].GFQPTnGVGY.[Q]	N6(Deamidated)	1	1	QHD43416.1_S2_RBD	QHD43416.1_S2_RBD	1	2	0.216	0	1	1	520.738	1040.47	1040.47	0.43	0.00022	HCD (High Energy Collision Dissociation)	MS2	43.9098	24.25	81.9557	23050	200428_Lumos_(LC1200)_nanoFlex_Ieva_SARS_CoV2_i1_Chy_Chymo_90min_ETD_HCD_2ul.raw	F11		2.5	FALSE	0.6218	0.9751	22625034	82.06
		TRUE	Low	Sequest HT (A18)	Ambiguous	[Y].GFQPTnGVGY.[Q]	N6(Deamidated)	1	1	QHD43416.1_S2_RBD	QHD43416.1_S2_RBD	1	2	0.2443	0	1	1	520.738	1040.47	1040.47	0.43	0.00022	HCD (High Energy Collision Dissociation)	MS2	1.78162	0.61	83.7326	23623	200428_Lumos_(LC1200)_nanoFlex_Ieva_SARS_CoV2_i1_Chy_Chymo_90min_ETD_HCD_2ul.raw	F11		2.21	FALSE	0.2219	0.7799	226731088	83.74
	TRUE	High	[Y].GFQPTNGVGYQPY.[R]			FALSE	0.00339019	0	1	1	20	QHD43416.1_S2_RBD	QHD43416.1_S2_RBD [323-335]	2	1427.66	2145295530		High	High	0	0.008811	2.7	92.82
		Checked	Confidence	Identifying Node	PSM Ambiguity	Annotated Sequence	Modifications	# Protein Groups	# Proteins	Master Protein Accessions	Protein Accessions	# Missed Cleavages	Charge	DeltaScore	DeltaCn	Rank	Search Engine Rank	m/z [Da]	MH+ [Da]	Theo. MH+ [Da]	DeltaM [ppm]	Deltam/z [Da]	Activation Type	MS Order	Isolation Interference [%]	Ion Inject Time [ms]	RT [min]	First Scan	Spectrum File	File ID	Quan Info	XCorr	Contaminant	Percolator q-Value	Percolator PEP	Precursor Abundance	Apex RT [min]
		TRUE	High	Sequest HT (A2)	Unambiguous	[Y].GFQPTNGVGYQPY.[R]		1	1	QHD43416.1_S2_RBD	QHD43416.1_S2_RBD	2	2	0.5798	0	1	1	714.333	1427.66	1427.66	0.33	0.00023	ETD (Electron Transfer Dissociation)	MS2	41.8469	20.739	92.2853	26421	200428_Lumos_(LC1200)_nanoFlex_Ieva_SARS_CoV2_i1_Chy_Chymo_90min_ETD_HCD_2ul.raw	F11		2.38	FALSE	0	0.02906	2137825792	92.82
		TRUE	High	Sequest HT (A2)	Unambiguous	[Y].GFQPTNGVGYQPY.[R]		1	1	QHD43416.1_S2_RBD	QHD43416.1_S2_RBD	2	2	0.5947	0	1	1	714.333	1427.66	1427.66	0.5	0.00036	ETD (Electron Transfer Dissociation)	MS2	0	0.43	92.6244	26527	200428_Lumos_(LC1200)_nanoFlex_Ieva_SARS_CoV2_i1_Chy_Chymo_90min_ETD_HCD_2ul.raw	F11		2.64	FALSE	0	0.03328	2137825792	92.82
		TRUE	High	Sequest HT (A2)	Unambiguous	[Y].GFQPTNGVGYQPY.[R]		1	1	QHD43416.1_S2_RBD	QHD43416.1_S2_RBD	2	2	0.6402	0	1	1	714.334	1427.66	1427.66	1.01	0.00072	ETD (Electron Transfer Dissociation)	MS2	0.254635	0.279	92.9794	26642	200428_Lumos_(LC1200)_nanoFlex_Ieva_SARS_CoV2_i1_Chy_Chymo_90min_ETD_HCD_2ul.raw	F11		2.39	FALSE	0	0.03539	2137825792	92.82
		TRUE	High	Sequest HT (A2)	Unambiguous	[Y].GFQPTNGVGYQPY.[R]		1	1	QHD43416.1_S2_RBD	QHD43416.1_S2_RBD	2	2	0.5574	0	1	1	714.334	1427.66	1427.66	0.75	0.00054	ETD (Electron Transfer Dissociation)	MS2	0.160646	0.561	93.3675	26769	200428_Lumos_(LC1200)_nanoFlex_Ieva_SARS_CoV2_i1_Chy_Chymo_90min_ETD_HCD_2ul.raw	F11		2.44	FALSE	0	0.1161	2137825792	92.82
		TRUE	High	Sequest HT (A2)	Unambiguous	[Y].GFQPTNGVGYQPY.[R]		1	1	QHD43416.1_S2_RBD	QHD43416.1_S2_RBD	2	2	0.6089	0	1	1	714.333	1427.66	1427.66	0.16	0.00011	ETD (Electron Transfer Dissociation)	MS2	2.46322	5.275	93.765	26902	200428_Lumos_(LC1200)_nanoFlex_Ieva_SARS_CoV2_i1_Chy_Chymo_90min_ETD_HCD_2ul.raw	F11		2.48	FALSE	0	0.01808	2137825792	92.82
		TRUE	High	Sequest HT (A2)	Unambiguous	[Y].GFQPTNGVGYQPY.[R]		1	1	QHD43416.1_S2_RBD	QHD43416.1_S2_RBD	2	2	0.6032	0	1	1	714.333	1427.66	1427.66	0.24	0.00017	ETD (Electron Transfer Dissociation)	MS2	21.7898	5.997	94.1817	27035	200428_Lumos_(LC1200)_nanoFlex_Ieva_SARS_CoV2_i1_Chy_Chymo_90min_ETD_HCD_2ul.raw	F11		2.52	FALSE	0	0.02675	2137825792	92.82
		TRUE	High	Sequest HT (A2)	Unambiguous	[Y].GFQPTNGVGYQPY.[R]		1	1	QHD43416.1_S2_RBD	QHD43416.1_S2_RBD	2	2	0.6185	0	1	1	714.333	1427.66	1427.66	-0.02	-1e-05	ETD (Electron Transfer Dissociation)	MS2	32.489	16.81	94.5619	27157	200428_Lumos_(LC1200)_nanoFlex_Ieva_SARS_CoV2_i1_Chy_Chymo_90min_ETD_HCD_2ul.raw	F11		2.7	FALSE	0	0.008811	2137825792	92.82
		TRUE	High	Sequest HT (A16)	Unambiguous	[Y].GFQPTNGVGYQPY.[R]		1	1	QHD43416.1_S2_RBD	QHD43416.1_S2_RBD	2	2	0.2872	0	1	1	714.333	1427.66	1427.66	0.33	0.00023	HCD (High Energy Collision Dissociation)	MS2	41.8469	15.777	92.2968	26424	200428_Lumos_(LC1200)_nanoFlex_Ieva_SARS_CoV2_i1_Chy_Chymo_90min_ETD_HCD_2ul.raw	F11		1.95	FALSE	0.002712	0.2141	2137825792	92.82
		TRUE	High	Sequest HT (A16)	Unambiguous	[Y].GFQPTNGVGYQPY.[R]		1	1	QHD43416.1_S2_RBD	QHD43416.1_S2_RBD	2	2	0.562	0	1	1	714.333	1427.66	1427.66	0.5	0.00036	HCD (High Energy Collision Dissociation)	MS2	0	0.234	92.6349	26529	200428_Lumos_(LC1200)_nanoFlex_Ieva_SARS_CoV2_i1_Chy_Chymo_90min_ETD_HCD_2ul.raw	F11		2.58	FALSE	0.001846	0.1787	2137825792	92.82
		TRUE	Medium	Sequest HT (A16)	Ambiguous	[Y].GFQPTNGVGYQPY.[R]		1	1	QHD43416.1_S2_RBD	QHD43416.1_S2_RBD	2	2	0.5451	0	1	1	714.334	1427.66	1427.66	1.01	0.00072	HCD (High Energy Collision Dissociation)	MS2	0.254635	0.15	92.9903	26644	200428_Lumos_(LC1200)_nanoFlex_Ieva_SARS_CoV2_i1_Chy_Chymo_90min_ETD_HCD_2ul.raw	F11		2.33	FALSE	0.01025	0.3382	2137825792	92.82
		TRUE	High	Sequest HT (A16)	Unambiguous	[Y].GFQPTNGVGYQPY.[R]		1	1	QHD43416.1_S2_RBD	QHD43416.1_S2_RBD	2	2	0.5083	0	1	1	714.334	1427.66	1427.66	0.75	0.00054	HCD (High Energy Collision Dissociation)	MS2	0.160646	0.428	93.3781	26771	200428_Lumos_(LC1200)_nanoFlex_Ieva_SARS_CoV2_i1_Chy_Chymo_90min_ETD_HCD_2ul.raw	F11		2.42	FALSE	0	0.04964	2137825792	92.82
		TRUE	Low	Sequest HT (A16)	Ambiguous	[Y].GFQPTNGVGYQPY.[R]		1	1	QHD43416.1_S2_RBD	QHD43416.1_S2_RBD	2	2	0.3333	0	1	1	714.333	1427.66	1427.66	0.16	0.00011	HCD (High Energy Collision Dissociation)	MS2	2.46322	1.69	93.7754	26904	200428_Lumos_(LC1200)_nanoFlex_Ieva_SARS_CoV2_i1_Chy_Chymo_90min_ETD_HCD_2ul.raw	F11		1.29	FALSE	0.1054	0.6924	2137825792	92.82
		TRUE	Low	Sequest HT (A16)	Ambiguous	[Y].GFQPTNGVGYQPY.[R]		1	1	QHD43416.1_S2_RBD	QHD43416.1_S2_RBD	2	2		0.0472	2	2	714.333	1427.66	1427.66	0.24	0.00017	HCD (High Energy Collision Dissociation)	MS2	21.7898	3.422	94.1903	27037	200428_Lumos_(LC1200)_nanoFlex_Ieva_SARS_CoV2_i1_Chy_Chymo_90min_ETD_HCD_2ul.raw	F11		1.01	FALSE	0.5388	0.9784	2137825792	92.82
		TRUE	Low	Sequest HT (A16)	Ambiguous	[Y].GFQPTNGVGYQPY.[R]		1	1	QHD43416.1_S2_RBD	QHD43416.1_S2_RBD	2	2	0.0132	0	1	1	714.333	1427.66	1427.66	-0.02	-1e-05	HCD (High Energy Collision Dissociation)	MS2	32.489	4.686	94.5699	27159	200428_Lumos_(LC1200)_nanoFlex_Ieva_SARS_CoV2_i1_Chy_Chymo_90min_ETD_HCD_2ul.raw	F11		0.76	FALSE	0.6141	0.9932	2137825792	92.82
		TRUE	Low	Sequest HT (A16)	Ambiguous	[Y].GFQPTNGVGYQPY.[R]		1	1	QHD43416.1_S2_RBD	QHD43416.1_S2_RBD	2	2	0.3097	0	1	1	714.333	1427.66	1427.66	-0.79	-0.00056	HCD (High Energy Collision Dissociation)	MS2	23.9243	15.97	100.776	29115	200428_Lumos_(LC1200)_nanoFlex_Ieva_SARS_CoV2_i1_Chy_Chymo_90min_ETD_HCD_2ul.raw	F11		1.55	FALSE	0.1955	0.8027	7469738	100.82
		TRUE	Low	Sequest HT (A18)	Ambiguous	[Y].GFQPTNGVGYQPY.[R]		1	1	QHD43416.1_S2_RBD	QHD43416.1_S2_RBD	2	2	0.4592	0	1	1	714.334	1427.66	1427.66	1.01	0.00072	HCD (High Energy Collision Dissociation)	MS2	0.254635	0.15	92.9903	26644	200428_Lumos_(LC1200)_nanoFlex_Ieva_SARS_CoV2_i1_Chy_Chymo_90min_ETD_HCD_2ul.raw	F11		2.33	FALSE	0.3412	0.8526	2137825792	92.82
		TRUE	Low	Sequest HT (A18)	Ambiguous	[Y].GFQPTNGVGYQPY.[R]		1	1	QHD43416.1_S2_RBD	QHD43416.1_S2_RBD	2	2	0.2093	0	1	1	714.333	1427.66	1427.66	0.16	0.00011	HCD (High Energy Collision Dissociation)	MS2	2.46322	1.69	93.7754	26904	200428_Lumos_(LC1200)_nanoFlex_Ieva_SARS_CoV2_i1_Chy_Chymo_90min_ETD_HCD_2ul.raw	F11		1.29	FALSE	0.8902	1	2137825792	92.82
		TRUE	Low	Sequest HT (A18)	Ambiguous	[Y].GFQPTNGVGYQPY.[R]		1	1	QHD43416.1_S2_RBD	QHD43416.1_S2_RBD	2	2		0.0098	3	3	714.333	1427.66	1427.66	0.24	0.00017	HCD (High Energy Collision Dissociation)	MS2	21.7898	3.422	94.1903	27037	200428_Lumos_(LC1200)_nanoFlex_Ieva_SARS_CoV2_i1_Chy_Chymo_90min_ETD_HCD_2ul.raw	F11		1.01	FALSE	0.8384	1	2137825792	92.82
		TRUE	Low	Sequest HT (A18)	Ambiguous	[Y].GFQPTNGVGYQPY.[R]		1	1	QHD43416.1_S2_RBD	QHD43416.1_S2_RBD	2	2		0.0256	4	4	714.333	1427.66	1427.66	-0.02	-1e-05	HCD (High Energy Collision Dissociation)	MS2	32.489	4.686	94.5699	27159	200428_Lumos_(LC1200)_nanoFlex_Ieva_SARS_CoV2_i1_Chy_Chymo_90min_ETD_HCD_2ul.raw	F11		0.76	FALSE	0.9277	1	2137825792	92.82
		TRUE	Low	Sequest HT (A18)	Ambiguous	[Y].GFQPTNGVGYQPY.[R]		1	1	QHD43416.1_S2_RBD	QHD43416.1_S2_RBD	2	2	0.2774	0	1	1	714.333	1427.66	1427.66	-0.79	-0.00056	HCD (High Energy Collision Dissociation)	MS2	23.9243	15.97	100.776	29115	200428_Lumos_(LC1200)_nanoFlex_Ieva_SARS_CoV2_i1_Chy_Chymo_90min_ETD_HCD_2ul.raw	F11		1.55	FALSE	0.7094	1	7469738	100.82
	TRUE	High	[Y].GFQPTNGVGYQPY.[R]	1xDeamidated [N6]		FALSE	0.00258483	0	1	1	21	QHD43416.1_S2_RBD	QHD43416.1_S2_RBD [323-335]	2	1428.64	4111368416		High	High	0	0.006804	2.77	95.43
		Checked	Confidence	Identifying Node	PSM Ambiguity	Annotated Sequence	Modifications	# Protein Groups	# Proteins	Master Protein Accessions	Protein Accessions	# Missed Cleavages	Charge	DeltaScore	DeltaCn	Rank	Search Engine Rank	m/z [Da]	MH+ [Da]	Theo. MH+ [Da]	DeltaM [ppm]	Deltam/z [Da]	Activation Type	MS Order	Isolation Interference [%]	Ion Inject Time [ms]	RT [min]	First Scan	Spectrum File	File ID	Quan Info	XCorr	Contaminant	Percolator q-Value	Percolator PEP	Precursor Abundance	Apex RT [min]
		TRUE	Low	Sequest HT (A2)	Ambiguous	[Y].GFQPTnGVGYQPY.[R]	N6(Deamidated)	1	1	QHD43416.1_S2_RBD	QHD43416.1_S2_RBD	2	2		0.0222	2	2	714.825	1428.64	1428.64	0.15	0.00011	ETD (Electron Transfer Dissociation)	MS2	21.6232	7.754	95.2359	27376	200428_Lumos_(LC1200)_nanoFlex_Ieva_SARS_CoV2_i1_Chy_Chymo_90min_ETD_HCD_2ul.raw	F11		0.88	FALSE	0.7941	1	2670301696	95.43
		TRUE	High	Sequest HT (A2)	Unambiguous	[Y].GFQPTnGVGYQPY.[R]	N6(Deamidated)	1	1	QHD43416.1_S2_RBD	QHD43416.1_S2_RBD	2	2	0.4615	0	1	1	714.826	1428.64	1428.64	0.92	0.00066	ETD (Electron Transfer Dissociation)	MS2	0.76619	0.245	95.5815	27489	200428_Lumos_(LC1200)_nanoFlex_Ieva_SARS_CoV2_i1_Chy_Chymo_90min_ETD_HCD_2ul.raw	F11		2.73	FALSE	0	0.01256	2670301696	95.43
		TRUE	High	Sequest HT (A2)	Unambiguous	[Y].GFQPTnGVGYQPY.[R]	N6(Deamidated)	1	1	QHD43416.1_S2_RBD	QHD43416.1_S2_RBD	2	2	0.4621	0	1	1	714.825	1428.64	1428.64	-0.19	-0.00014	ETD (Electron Transfer Dissociation)	MS2	0.694757	0.536	95.9533	27609	200428_Lumos_(LC1200)_nanoFlex_Ieva_SARS_CoV2_i1_Chy_Chymo_90min_ETD_HCD_2ul.raw	F11		2.77	FALSE	0	0.006804	2670301696	95.43
		TRUE	High	Sequest HT (A2)	Unambiguous	[Y].GFQPTnGVGYQPY.[R]	N6(Deamidated)	1	1	QHD43416.1_S2_RBD	QHD43416.1_S2_RBD	2	2	0.4506	0	1	1	714.825	1428.64	1428.64	-0.36	-0.00026	ETD (Electron Transfer Dissociation)	MS2	0	16.06	97.2821	27996	200428_Lumos_(LC1200)_nanoFlex_Ieva_SARS_CoV2_i1_Chy_Chymo_90min_ETD_HCD_2ul.raw	F11		2.33	FALSE	0	0.04119	1013270976	97.57
		TRUE	High	Sequest HT (A2)	Unambiguous	[Y].GFQPTnGVGYQPY.[R]	N6(Deamidated)	1	1	QHD43416.1_S2_RBD	QHD43416.1_S2_RBD	2	2	0.4321	0	1	1	714.826	1428.64	1428.64	0.58	0.00041	ETD (Electron Transfer Dissociation)	MS2	0	0.564	97.6164	28102	200428_Lumos_(LC1200)_nanoFlex_Ieva_SARS_CoV2_i1_Chy_Chymo_90min_ETD_HCD_2ul.raw	F11		2.43	FALSE	0	0.01619	1013270976	97.57
		TRUE	High	Sequest HT (A2)	Unambiguous	[Y].GFQPTnGVGYQPY.[R]	N6(Deamidated)	1	1	QHD43416.1_S2_RBD	QHD43416.1_S2_RBD	2	2	0.6441	0	1	1	714.825	1428.64	1428.64	0.24	0.00017	ETD (Electron Transfer Dissociation)	MS2	3.00549	2.181	97.9914	28218	200428_Lumos_(LC1200)_nanoFlex_Ieva_SARS_CoV2_i1_Chy_Chymo_90min_ETD_HCD_2ul.raw	F11		2.36	FALSE	0	0.04952	427795744	98.24
		TRUE	High	Sequest HT (A2)	Unambiguous	[Y].GFQPTnGVGYQPY.[R]	N6(Deamidated)	1	1	QHD43416.1_S2_RBD	QHD43416.1_S2_RBD	2	2	0.5294	0	1	1	714.825	1428.64	1428.64	0.32	0.00023	ETD (Electron Transfer Dissociation)	MS2	0.458969	0.884	98.368	28343	200428_Lumos_(LC1200)_nanoFlex_Ieva_SARS_CoV2_i1_Chy_Chymo_90min_ETD_HCD_2ul.raw	F11		2.21	FALSE	0	0.07488	427795744	98.24
		TRUE	High	Sequest HT (A2)	Unambiguous	[Y].GFQPTnGVGYQPY.[R]	N6(Deamidated)	1	1	QHD43416.1_S2_RBD	QHD43416.1_S2_RBD	2	2	0.6147	0	1	1	714.826	1428.64	1428.64	0.66	0.00047	ETD (Electron Transfer Dissociation)	MS2	38.3668	10.797	98.8102	28483	200428_Lumos_(LC1200)_nanoFlex_Ieva_SARS_CoV2_i1_Chy_Chymo_90min_ETD_HCD_2ul.raw	F11		2.31	FALSE	0	0.03158	427795744	98.24
		TRUE	High	Sequest HT (A2)	Unambiguous	[Y].GFQPTnGVGYQPY.[R]	N6(Deamidated)	1	1	QHD43416.1_S2_RBD	QHD43416.1_S2_RBD	2	2	0.5787	0	1	1	714.825	1428.64	1428.64	-0.36	-0.00026	ETD (Electron Transfer Dissociation)	MS2	35.0813	18.615	99.1972	28607	200428_Lumos_(LC1200)_nanoFlex_Ieva_SARS_CoV2_i1_Chy_Chymo_90min_ETD_HCD_2ul.raw	F11		1.78	FALSE	0.001755	0.2235	427795744	98.24
		TRUE	High	Sequest HT (A16)	Unambiguous	[Y].GFQPTnGVGYQPY.[R]	N6(Deamidated)	1	1	QHD43416.1_S2_RBD	QHD43416.1_S2_RBD	2	2	0.4828	0	1	1	714.825	1428.64	1428.64	0.15	0.00011	HCD (High Energy Collision Dissociation)	MS2	21.6232	0.519	95.246	27378	200428_Lumos_(LC1200)_nanoFlex_Ieva_SARS_CoV2_i1_Chy_Chymo_90min_ETD_HCD_2ul.raw	F11		2.61	FALSE	0.001846	0.1906	2670301696	95.43
		TRUE	High	Sequest HT (A16)	Unambiguous	[Y].GFQPTnGVGYQPY.[R]	N6(Deamidated)	1	1	QHD43416.1_S2_RBD	QHD43416.1_S2_RBD	2	2	0.431	0	1	1	714.826	1428.64	1428.64	0.92	0.00066	HCD (High Energy Collision Dissociation)	MS2	0.76619	0.128	95.5898	27490	200428_Lumos_(LC1200)_nanoFlex_Ieva_SARS_CoV2_i1_Chy_Chymo_90min_ETD_HCD_2ul.raw	F11		1.74	FALSE	0.0009362	0.09411	2670301696	95.43
		TRUE	Medium	Sequest HT (A16)	Ambiguous	[Y].GFQPTnGVGYQPY.[R]	N6(Deamidated)	1	1	QHD43416.1_S2_RBD	QHD43416.1_S2_RBD	2	2	0.3787	0	1	1	714.825	1428.64	1428.64	-0.19	-0.00014	HCD (High Energy Collision Dissociation)	MS2	0.694757	0.38	95.9633	27611	200428_Lumos_(LC1200)_nanoFlex_Ieva_SARS_CoV2_i1_Chy_Chymo_90min_ETD_HCD_2ul.raw	F11		1.69	FALSE	0.02518	0.443	2670301696	95.43
		TRUE	Medium	Sequest HT (A16)	Ambiguous	[Y].GFQPTnGVGYQPY.[R]	N6(Deamidated)	1	1	QHD43416.1_S2_RBD	QHD43416.1_S2_RBD	2	2	0.2381	0	1	1	714.825	1428.64	1428.64	-0.36	-0.00026	HCD (High Energy Collision Dissociation)	MS2	0	9.458	97.2904	27997	200428_Lumos_(LC1200)_nanoFlex_Ieva_SARS_CoV2_i1_Chy_Chymo_90min_ETD_HCD_2ul.raw	F11		1.47	FALSE	0.02518	0.4423	1013270976	97.57
		TRUE	High	Sequest HT (A16)	Unambiguous	[Y].GFQPTnGVGYQPY.[R]	N6(Deamidated)	1	1	QHD43416.1_S2_RBD	QHD43416.1_S2_RBD	2	2	0.4909	0	1	1	714.826	1428.64	1428.64	0.58	0.00041	HCD (High Energy Collision Dissociation)	MS2	0	0.357	97.6245	28103	200428_Lumos_(LC1200)_nanoFlex_Ieva_SARS_CoV2_i1_Chy_Chymo_90min_ETD_HCD_2ul.raw	F11		2.2	FALSE	0.002712	0.1948	1013270976	97.57
		TRUE	High	Sequest HT (A16)	Unambiguous	[Y].GFQPTnGVGYQPY.[R]	N6(Deamidated)	1	1	QHD43416.1_S2_RBD	QHD43416.1_S2_RBD	2	2	0.4804	0	1	1	714.825	1428.64	1428.64	0.24	0.00017	HCD (High Energy Collision Dissociation)	MS2	3.00549	2.121	97.9993	28219	200428_Lumos_(LC1200)_nanoFlex_Ieva_SARS_CoV2_i1_Chy_Chymo_90min_ETD_HCD_2ul.raw	F11		2.04	FALSE	0.00437	0.2642	427795744	98.24
		TRUE	High	Sequest HT (A16)	Unambiguous	[Y].GFQPTnGVGYQPY.[R]	N6(Deamidated)	1	1	QHD43416.1_S2_RBD	QHD43416.1_S2_RBD	2	2	0.4128	0	1	1	714.825	1428.64	1428.64	0.32	0.00023	HCD (High Energy Collision Dissociation)	MS2	0.458969	0.604	98.3773	28345	200428_Lumos_(LC1200)_nanoFlex_Ieva_SARS_CoV2_i1_Chy_Chymo_90min_ETD_HCD_2ul.raw	F11		2.18	FALSE	0.0009362	0.1508	427795744	98.24
		TRUE	Medium	Sequest HT (A16)	Ambiguous	[Y].GFQPTnGVGYQPY.[R]	N6(Deamidated)	1	1	QHD43416.1_S2_RBD	QHD43416.1_S2_RBD	2	2	0.2519	0	1	1	714.826	1428.64	1428.64	0.66	0.00047	HCD (High Energy Collision Dissociation)	MS2	38.3668	11.075	98.8172	28485	200428_Lumos_(LC1200)_nanoFlex_Ieva_SARS_CoV2_i1_Chy_Chymo_90min_ETD_HCD_2ul.raw	F11		1.35	FALSE	0.02581	0.4552	427795744	98.24
		TRUE	Low	Sequest HT (A16)	Ambiguous	[Y].GFQPTnGVGYQPY.[R]	N6(Deamidated)	1	1	QHD43416.1_S2_RBD	QHD43416.1_S2_RBD	2	2		0.0471	2	2	714.825	1428.64	1428.64	-0.36	-0.00026	HCD (High Energy Collision Dissociation)	MS2	35.0813	9.199	99.206	28609	200428_Lumos_(LC1200)_nanoFlex_Ieva_SARS_CoV2_i1_Chy_Chymo_90min_ETD_HCD_2ul.raw	F11		0.81	FALSE	0.6231	0.9949	427795744	98.24
		TRUE	Low	Sequest HT (A18)	Ambiguous	[Y].GFQPTnGVGYQPY.[R]	N6(Deamidated)	1	1	QHD43416.1_S2_RBD	QHD43416.1_S2_RBD	2	2	0.1657	0	1	1	714.825	1428.64	1428.64	-0.19	-0.00014	HCD (High Energy Collision Dissociation)	MS2	0.694757	0.38	95.9633	27611	200428_Lumos_(LC1200)_nanoFlex_Ieva_SARS_CoV2_i1_Chy_Chymo_90min_ETD_HCD_2ul.raw	F11		1.69	FALSE	0.8615	1	2670301696	95.43
		TRUE	Low	Sequest HT (A18)	Ambiguous	[Y].GFQPTnGVGYQPY.[R]	N6(Deamidated)	1	1	QHD43416.1_S2_RBD	QHD43416.1_S2_RBD	2	2		0.02	2	2	714.825	1428.64	1428.64	-0.36	-0.00026	HCD (High Energy Collision Dissociation)	MS2	0	9.458	97.2904	27997	200428_Lumos_(LC1200)_nanoFlex_Ieva_SARS_CoV2_i1_Chy_Chymo_90min_ETD_HCD_2ul.raw	F11		1.47	FALSE	0.9027	1	1013270976	97.57
		TRUE	Low	Sequest HT (A18)	Ambiguous	[Y].GFQPTnGVGYQPY.[R]	N6(Deamidated)	1	1	QHD43416.1_S2_RBD	QHD43416.1_S2_RBD	2	2	0.1333	0	1	1	714.826	1428.64	1428.64	0.66	0.00047	HCD (High Energy Collision Dissociation)	MS2	38.3668	11.075	98.8172	28485	200428_Lumos_(LC1200)_nanoFlex_Ieva_SARS_CoV2_i1_Chy_Chymo_90min_ETD_HCD_2ul.raw	F11		1.35	FALSE	0.6844	0.9968	427795744	98.24
	TRUE	High	[C].GPKKSTNLVKNKCVNF.[N]	1xCarbamidomethyl [C13]		FALSE	0.000193109	0	1	1	4	QHD43416.1_S2_RBD	QHD43416.1_S2_RBD [353-368]	1	1834	31095814		High	High	0	0.0002233	7.11	44.33
		Checked	Confidence	Identifying Node	PSM Ambiguity	Annotated Sequence	Modifications	# Protein Groups	# Proteins	Master Protein Accessions	Protein Accessions	# Missed Cleavages	Charge	DeltaScore	DeltaCn	Rank	Search Engine Rank	m/z [Da]	MH+ [Da]	Theo. MH+ [Da]	DeltaM [ppm]	Deltam/z [Da]	Activation Type	MS Order	Isolation Interference [%]	Ion Inject Time [ms]	RT [min]	First Scan	Spectrum File	File ID	Quan Info	XCorr	Contaminant	Percolator q-Value	Percolator PEP	Precursor Abundance	Apex RT [min]
		TRUE	High	Sequest HT (A14)	Ambiguous	[C].GPKKSTNLVKNKcVNF.[N]	C13(Carbamidomethyl)	1	1	QHD43416.1_S2_RBD	QHD43416.1_S2_RBD	1	4	0.6788	0	1	1	459.256	1834	1834	1.28	0.00059	ETD (Electron Transfer Dissociation)	MS2	15.6203	13.92	44.2874	11470	200428_Lumos_(LC1200)_nanoFlex_Ieva_SARS_CoV2_i1_Chy_Chymo_90min_ETD_HCD_2ul.raw	F11		5.48	FALSE	0	0.004728	20474280	44.33
		TRUE	High	Sequest HT (A14)	Ambiguous	[C].GPKKSTNLVKNKcVNF.[N]	C13(Carbamidomethyl)	1	1	QHD43416.1_S2_RBD	QHD43416.1_S2_RBD	1	3	0.7468	0	1	1	612.005	1834	1834	0.25	0.00015	ETD (Electron Transfer Dissociation)	MS2	34.4869	12.934	44.3673	11492	200428_Lumos_(LC1200)_nanoFlex_Ieva_SARS_CoV2_i1_Chy_Chymo_90min_ETD_HCD_2ul.raw	F11		7.11	FALSE	0	0.0002233	10621534	44.32
		TRUE	Low	Sequest HT (A18)	Ambiguous	[C].GPKKSTNLVKNKcVNF.[N]	C13(Carbamidomethyl)	1	1	QHD43416.1_S2_RBD	QHD43416.1_S2_RBD	1	4	0.4987	0	1	1	459.256	1834	1834	1.28	0.00059	HCD (High Energy Collision Dissociation)	MS2	15.6203	5.214	44.2974	11472	200428_Lumos_(LC1200)_nanoFlex_Ieva_SARS_CoV2_i1_Chy_Chymo_90min_ETD_HCD_2ul.raw	F11		3.93	FALSE	0.05267	0.5706	20474280	44.33
		TRUE	High	Sequest HT (A18)	Ambiguous	[C].GPKKSTNLVKNKcVNF.[N]	C13(Carbamidomethyl)	1	1	QHD43416.1_S2_RBD	QHD43416.1_S2_RBD	1	3	0.4577	0	1	1	612.005	1834	1834	0.25	0.00015	HCD (High Energy Collision Dissociation)	MS2	34.4869	5.342	44.3762	11494	200428_Lumos_(LC1200)_nanoFlex_Ieva_SARS_CoV2_i1_Chy_Chymo_90min_ETD_HCD_2ul.raw	F11		4.26	FALSE	0	0.06117	10621534	44.32
	TRUE	High	[C].GPKKSTNLVKNKCVNF.[N]	1xCarbamidomethyl [C13]; 1xDeamidated [N7]		FALSE	0.000154493	0	1	1	2	QHD43416.1_S2_RBD	QHD43416.1_S2_RBD [353-368]	1	1834.98	4.95412e+06		High	High	0	0.0001791	6.72	51.24
		Checked	Confidence	Identifying Node	PSM Ambiguity	Annotated Sequence	Modifications	# Protein Groups	# Proteins	Master Protein Accessions	Protein Accessions	# Missed Cleavages	Charge	DeltaScore	DeltaCn	Rank	Search Engine Rank	m/z [Da]	MH+ [Da]	Theo. MH+ [Da]	DeltaM [ppm]	Deltam/z [Da]	Activation Type	MS Order	Isolation Interference [%]	Ion Inject Time [ms]	RT [min]	First Scan	Spectrum File	File ID	Quan Info	XCorr	Contaminant	Percolator q-Value	Percolator PEP	Precursor Abundance	Apex RT [min]
		TRUE	High	Sequest HT (A14)	Ambiguous	[C].GPKKSTnLVKNKcVNF.[N]	N7(Deamidated); C13(Carbamidomethyl)	1	1	QHD43416.1_S2_RBD	QHD43416.1_S2_RBD	1	4	0.2232	0	1	1	459.502	1834.99	1834.98	0.54	0.00025	ETD (Electron Transfer Dissociation)	MS2	23.6396	29.91	51.2037	13486	200428_Lumos_(LC1200)_nanoFlex_Ieva_SARS_CoV2_i1_Chy_Chymo_90min_ETD_HCD_2ul.raw	F11		6.72	FALSE	0	0.0001791	4.95412e+06	51.24
		TRUE	High	Sequest HT (A18)	Ambiguous	[C].GPKKSTnLVKNKcVNF.[N]	N7(Deamidated); C13(Carbamidomethyl)	1	1	QHD43416.1_S2_RBD	QHD43416.1_S2_RBD	1	4	0.2643	0	1	1	459.502	1834.99	1834.98	0.54	0.00025	HCD (High Energy Collision Dissociation)	MS2	23.6396	12.283	51.2126	13488	200428_Lumos_(LC1200)_nanoFlex_Ieva_SARS_CoV2_i1_Chy_Chymo_90min_ETD_HCD_2ul.raw	F11		3.67	FALSE	0.003676	0.1036	4.95412e+06	51.24
	TRUE	High	[Y].GVSPTKLNDL.[C]			FALSE	0.0135301	0	1	1	7	QHD43416.1_S2_RBD	QHD43416.1_S2_RBD [208-217]	1	1043.57	1681317760		High	High	0	0.01813	2.94	66.55
		Checked	Confidence	Identifying Node	PSM Ambiguity	Annotated Sequence	Modifications	# Protein Groups	# Proteins	Master Protein Accessions	Protein Accessions	# Missed Cleavages	Charge	DeltaScore	DeltaCn	Rank	Search Engine Rank	m/z [Da]	MH+ [Da]	Theo. MH+ [Da]	DeltaM [ppm]	Deltam/z [Da]	Activation Type	MS Order	Isolation Interference [%]	Ion Inject Time [ms]	RT [min]	First Scan	Spectrum File	File ID	Quan Info	XCorr	Contaminant	Percolator q-Value	Percolator PEP	Precursor Abundance	Apex RT [min]
		TRUE	High	Sequest HT (A2)	Unambiguous	[Y].GVSPTKLNDL.[C]		1	1	QHD43416.1_S2_RBD	QHD43416.1_S2_RBD	1	2	0.343	0	1	1	522.291	1043.57	1043.57	0.72	0.00037	ETD (Electron Transfer Dissociation)	MS2	1.2035	4.363	66.4998	18129	200428_Lumos_(LC1200)_nanoFlex_Ieva_SARS_CoV2_i1_Chy_Chymo_90min_ETD_HCD_2ul.raw	F11		2.07	FALSE	0.002538	0.307	1085169408	66.55
		TRUE	Low	Sequest HT (A2)	Ambiguous	[Y].GVSPTKLNDL.[C]		1	1	QHD43416.1_S2_RBD	QHD43416.1_S2_RBD	1	2	0.1824	0	1	1	522.29	1043.57	1043.57	0.25	0.00013	ETD (Electron Transfer Dissociation)	MS2	1.04833	1.705	66.8373	18236	200428_Lumos_(LC1200)_nanoFlex_Ieva_SARS_CoV2_i1_Chy_Chymo_90min_ETD_HCD_2ul.raw	F11		1.7	FALSE	0.06909	0.6786	596148352	66.92
		TRUE	Low	Sequest HT (A2)	Ambiguous	[Y].GVSPTKLNDL.[C]		1	1	QHD43416.1_S2_RBD	QHD43416.1_S2_RBD	1	2	0.1587	0	1	1	522.291	1043.57	1043.57	1.07	0.00056	ETD (Electron Transfer Dissociation)	MS2	18.9113	15.954	70.3753	19366	200428_Lumos_(LC1200)_nanoFlex_Ieva_SARS_CoV2_i1_Chy_Chymo_90min_ETD_HCD_2ul.raw	F11		0.63	FALSE	0.737	1
		TRUE	Low	Sequest HT (A14)	Ambiguous	[Y].GVSPTKLNDL.[C]		1	1	QHD43416.1_S2_RBD	QHD43416.1_S2_RBD	1	2	0.1824	0	1	1	522.29	1043.57	1043.57	0.25	0.00013	ETD (Electron Transfer Dissociation)	MS2	1.04833	1.705	66.8373	18236	200428_Lumos_(LC1200)_nanoFlex_Ieva_SARS_CoV2_i1_Chy_Chymo_90min_ETD_HCD_2ul.raw	F11		1.7	FALSE	0.3465	0.7969	596148352	66.92
		TRUE	Low	Sequest HT (A14)	Ambiguous	[Y].GVSPTKLNDL.[C]		1	1	QHD43416.1_S2_RBD	QHD43416.1_S2_RBD	1	2		0.0308	4	4	522.291	1043.57	1043.57	1.07	0.00056	ETD (Electron Transfer Dissociation)	MS2	18.9113	15.954	70.3753	19366	200428_Lumos_(LC1200)_nanoFlex_Ieva_SARS_CoV2_i1_Chy_Chymo_90min_ETD_HCD_2ul.raw	F11		0.63	FALSE	0.9394	1
		TRUE	High	Sequest HT (A16)	Unambiguous	[Y].GVSPTKLNDL.[C]		1	1	QHD43416.1_S2_RBD	QHD43416.1_S2_RBD	1	2	0.3623	0	1	1	522.291	1043.57	1043.57	0.72	0.00037	HCD (High Energy Collision Dissociation)	MS2	1.2035	0.157	66.5093	18131	200428_Lumos_(LC1200)_nanoFlex_Ieva_SARS_CoV2_i1_Chy_Chymo_90min_ETD_HCD_2ul.raw	F11		2.76	FALSE	0	0.02463	1085169408	66.55
		TRUE	High	Sequest HT (A16)	Unambiguous	[Y].GVSPTKLNDL.[C]		1	1	QHD43416.1_S2_RBD	QHD43416.1_S2_RBD	1	2	0.3776	0	1	1	522.29	1043.57	1043.57	0.25	0.00013	HCD (High Energy Collision Dissociation)	MS2	1.04833	0.949	66.847	18238	200428_Lumos_(LC1200)_nanoFlex_Ieva_SARS_CoV2_i1_Chy_Chymo_90min_ETD_HCD_2ul.raw	F11		2.94	FALSE	0	0.01813	596148352	66.92
	TRUE	High	[Y].GVSPTKLNDL.[C]	1xDeamidated [N8]		FALSE	0.0139649	0	1	1	2	QHD43416.1_S2_RBD	QHD43416.1_S2_RBD [208-217]	1	1044.56	32217566		High	High	0	0.01875	2.93	72.41
		Checked	Confidence	Identifying Node	PSM Ambiguity	Annotated Sequence	Modifications	# Protein Groups	# Proteins	Master Protein Accessions	Protein Accessions	# Missed Cleavages	Charge	DeltaScore	DeltaCn	Rank	Search Engine Rank	m/z [Da]	MH+ [Da]	Theo. MH+ [Da]	DeltaM [ppm]	Deltam/z [Da]	Activation Type	MS Order	Isolation Interference [%]	Ion Inject Time [ms]	RT [min]	First Scan	Spectrum File	File ID	Quan Info	XCorr	Contaminant	Percolator q-Value	Percolator PEP	Precursor Abundance	Apex RT [min]
		TRUE	High	Sequest HT (A2)	Unambiguous	[Y].GVSPTKLnDL.[C]	N8(Deamidated)	1	1	QHD43416.1_S2_RBD	QHD43416.1_S2_RBD	1	2	0.2789	0	1	1	522.783	1044.56	1044.56	0.59	0.00031	ETD (Electron Transfer Dissociation)	MS2	0	10.454	72.4176	19986	200428_Lumos_(LC1200)_nanoFlex_Ieva_SARS_CoV2_i1_Chy_Chymo_90min_ETD_HCD_2ul.raw	F11		1.9	FALSE	0.001755	0.263	32217566	72.41
		TRUE	High	Sequest HT (A16)	Unambiguous	[Y].GVSPTKLnDL.[C]	N8(Deamidated)	1	1	QHD43416.1_S2_RBD	QHD43416.1_S2_RBD	1	2	0.5017	0	1	1	522.783	1044.56	1044.56	0.59	0.00031	HCD (High Energy Collision Dissociation)	MS2	0	10.205	72.4277	19988	200428_Lumos_(LC1200)_nanoFlex_Ieva_SARS_CoV2_i1_Chy_Chymo_90min_ETD_HCD_2ul.raw	F11		2.93	FALSE	0	0.01875	32217566	72.41
	TRUE	High	[Y].GVSPTKLNDLC.[F]	1xCarbamidomethyl [C11]		FALSE	0.0629245	0.00340039	1	1	2	QHD43416.1_S2_RBD	QHD43416.1_S2_RBD [208-218]	2	1203.6	81081448		High	High	0	0.08309	3.33	65.75
		Checked	Confidence	Identifying Node	PSM Ambiguity	Annotated Sequence	Modifications	# Protein Groups	# Proteins	Master Protein Accessions	Protein Accessions	# Missed Cleavages	Charge	DeltaScore	DeltaCn	Rank	Search Engine Rank	m/z [Da]	MH+ [Da]	Theo. MH+ [Da]	DeltaM [ppm]	Deltam/z [Da]	Activation Type	MS Order	Isolation Interference [%]	Ion Inject Time [ms]	RT [min]	First Scan	Spectrum File	File ID	Quan Info	XCorr	Contaminant	Percolator q-Value	Percolator PEP	Precursor Abundance	Apex RT [min]
		TRUE	Low	Sequest HT (A14)	Ambiguous	[Y].GVSPTKLNDLc.[F]	C11(Carbamidomethyl)	1	1	QHD43416.1_S2_RBD	QHD43416.1_S2_RBD	2	2	0.5202	0	1	1	602.305	1203.6	1203.6	-0.3	-0.00018	ETD (Electron Transfer Dissociation)	MS2	22.8373	9.914	65.6767	17859	200428_Lumos_(LC1200)_nanoFlex_Ieva_SARS_CoV2_i1_Chy_Chymo_90min_ETD_HCD_2ul.raw	F11		1.98	FALSE	0.09664	0.5574	81081448	65.75
		TRUE	High	Sequest HT (A18)	Ambiguous	[Y].GVSPTKLNDLc.[F]	C11(Carbamidomethyl)	1	1	QHD43416.1_S2_RBD	QHD43416.1_S2_RBD	2	2	0.5375	0	1	1	602.305	1203.6	1203.6	-0.3	-0.00018	HCD (High Energy Collision Dissociation)	MS2	22.8373	5.131	65.6865	17862	200428_Lumos_(LC1200)_nanoFlex_Ieva_SARS_CoV2_i1_Chy_Chymo_90min_ETD_HCD_2ul.raw	F11		3.33	FALSE	0	0.08309	81081448	65.75
	TRUE	High	[Y].GVSPTKLNDLCF.[T]	1xCarbamidomethyl [C11]		FALSE	0.0134691	0	1	1	73	QHD43416.1_S2_RBD	QHD43416.1_S2_RBD [208-219]	2	1350.67	7.2796e+09		High	High	0	0.03173	3.19	96.42
		Checked	Confidence	Identifying Node	PSM Ambiguity	Annotated Sequence	Modifications	# Protein Groups	# Proteins	Master Protein Accessions	Protein Accessions	# Missed Cleavages	Charge	DeltaScore	DeltaCn	Rank	Search Engine Rank	m/z [Da]	MH+ [Da]	Theo. MH+ [Da]	DeltaM [ppm]	Deltam/z [Da]	Activation Type	MS Order	Isolation Interference [%]	Ion Inject Time [ms]	RT [min]	First Scan	Spectrum File	File ID	Quan Info	XCorr	Contaminant	Percolator q-Value	Percolator PEP	Precursor Abundance	Apex RT [min]
		TRUE	High	Sequest HT (A2)	Unambiguous	[Y].GVSPTKLNDLcF.[T]	C11(Carbamidomethyl)	1	1	QHD43416.1_S2_RBD	QHD43416.1_S2_RBD	2	2	0.5605	0	1	1	675.84	1350.67	1350.67	0.33	0.00022	ETD (Electron Transfer Dissociation)	MS2	39.9293	8.006	96.2026	27695	200428_Lumos_(LC1200)_nanoFlex_Ieva_SARS_CoV2_i1_Chy_Chymo_90min_ETD_HCD_2ul.raw	F11		1.57	FALSE	0.001755	0.2673	7270615040	96.42
		TRUE	High	Sequest HT (A2)	Unambiguous	[Y].GVSPTKLNDLcF.[T]	C11(Carbamidomethyl)	1	1	QHD43416.1_S2_RBD	QHD43416.1_S2_RBD	2	2	0.6133	0	1	1	675.84	1350.67	1350.67	0.24	0.00016	ETD (Electron Transfer Dissociation)	MS2	0.15006	0.088	96.5456	27798	200428_Lumos_(LC1200)_nanoFlex_Ieva_SARS_CoV2_i1_Chy_Chymo_90min_ETD_HCD_2ul.raw	F11		2.56	FALSE	0	0.0745	7270615040	96.42
		TRUE	High	Sequest HT (A2)	Unambiguous	[Y].GVSPTKLNDLcF.[T]	C11(Carbamidomethyl)	1	1	QHD43416.1_S2_RBD	QHD43416.1_S2_RBD	2	2	0.6282	0	1	1	675.84	1350.67	1350.67	0.33	0.00022	ETD (Electron Transfer Dissociation)	MS2	0	0.119	96.8887	27885	200428_Lumos_(LC1200)_nanoFlex_Ieva_SARS_CoV2_i1_Chy_Chymo_90min_ETD_HCD_2ul.raw	F11		2.34	FALSE	0	0.06385	7270615040	96.42
		TRUE	High	Sequest HT (A2)	Unambiguous	[Y].GVSPTKLNDLcF.[T]	C11(Carbamidomethyl)	1	1	QHD43416.1_S2_RBD	QHD43416.1_S2_RBD	2	2	0.641	0	1	1	675.84	1350.67	1350.67	0.87	0.00059	ETD (Electron Transfer Dissociation)	MS2	0	0.148	97.2311	27979	200428_Lumos_(LC1200)_nanoFlex_Ieva_SARS_CoV2_i1_Chy_Chymo_90min_ETD_HCD_2ul.raw	F11		2.34	FALSE	0	0.1351	7270615040	96.42
		TRUE	High	Sequest HT (A2)	Unambiguous	[Y].GVSPTKLNDLcF.[T]	C11(Carbamidomethyl)	1	1	QHD43416.1_S2_RBD	QHD43416.1_S2_RBD	2	2	0.6422	0	1	1	675.84	1350.67	1350.67	0.6	0.0004	ETD (Electron Transfer Dissociation)	MS2	0.409319	0.196	97.5846	28094	200428_Lumos_(LC1200)_nanoFlex_Ieva_SARS_CoV2_i1_Chy_Chymo_90min_ETD_HCD_2ul.raw	F11		2.32	FALSE	0	0.1257	7270615040	96.42
		TRUE	High	Sequest HT (A2)	Unambiguous	[Y].GVSPTKLNDLcF.[T]	C11(Carbamidomethyl)	1	1	QHD43416.1_S2_RBD	QHD43416.1_S2_RBD	2	2	0.6504	0	1	1	675.841	1350.67	1350.67	1.5	0.00101	ETD (Electron Transfer Dissociation)	MS2	0.194208	0.318	97.9408	28202	200428_Lumos_(LC1200)_nanoFlex_Ieva_SARS_CoV2_i1_Chy_Chymo_90min_ETD_HCD_2ul.raw	F11		2.26	FALSE	0.0009067	0.1526	7270615040	96.42
		TRUE	High	Sequest HT (A2)	Unambiguous	[Y].GVSPTKLNDLcF.[T]	C11(Carbamidomethyl)	1	1	QHD43416.1_S2_RBD	QHD43416.1_S2_RBD	2	2	0.6842	0	1	1	675.84	1350.67	1350.67	0.06	4e-05	ETD (Electron Transfer Dissociation)	MS2	0.61459	1.601	98.2985	28321	200428_Lumos_(LC1200)_nanoFlex_Ieva_SARS_CoV2_i1_Chy_Chymo_90min_ETD_HCD_2ul.raw	F11		2.47	FALSE	0	0.05233	7270615040	96.42
		TRUE	High	Sequest HT (A2)	Unambiguous	[Y].GVSPTKLNDLcF.[T]	C11(Carbamidomethyl)	1	1	QHD43416.1_S2_RBD	QHD43416.1_S2_RBD	2	2	0.6914	0	1	1	675.84	1350.67	1350.67	0.33	0.00022	ETD (Electron Transfer Dissociation)	MS2	6.35315	19.935	98.6905	28449	200428_Lumos_(LC1200)_nanoFlex_Ieva_SARS_CoV2_i1_Chy_Chymo_90min_ETD_HCD_2ul.raw	F11		2.56	FALSE	0	0.04691	7270615040	96.42
		TRUE	High	Sequest HT (A2)	Unambiguous	[Y].GVSPTKLNDLcF.[T]	C11(Carbamidomethyl)	1	1	QHD43416.1_S2_RBD	QHD43416.1_S2_RBD	2	2	0.6515	0	1	1	675.84	1350.67	1350.67	0.15	0.0001	ETD (Electron Transfer Dissociation)	MS2	26.9748	22.035	99.0836	28571	200428_Lumos_(LC1200)_nanoFlex_Ieva_SARS_CoV2_i1_Chy_Chymo_90min_ETD_HCD_2ul.raw	F11		2.64	FALSE	0	0.03224	7270615040	96.42
		TRUE	High	Sequest HT (A2)	Unambiguous	[Y].GVSPTKLNDLcF.[T]	C11(Carbamidomethyl)	1	1	QHD43416.1_S2_RBD	QHD43416.1_S2_RBD	2	2	0.6298	0	1	1	675.84	1350.67	1350.67	-0.31	-0.00021	ETD (Electron Transfer Dissociation)	MS2	38.2757	15.397	99.494	28702	200428_Lumos_(LC1200)_nanoFlex_Ieva_SARS_CoV2_i1_Chy_Chymo_90min_ETD_HCD_2ul.raw	F11		2.62	FALSE	0	0.03689	7270615040	96.42
		TRUE	High	Sequest HT (A2)	Unambiguous	[Y].GVSPTKLNDLcF.[T]	C11(Carbamidomethyl)	1	1	QHD43416.1_S2_RBD	QHD43416.1_S2_RBD	2	2	0.6855	0	1	1	675.84	1350.67	1350.67	0.24	0.00016	ETD (Electron Transfer Dissociation)	MS2	59.5042	23.148	99.9453	28846	200428_Lumos_(LC1200)_nanoFlex_Ieva_SARS_CoV2_i1_Chy_Chymo_90min_ETD_HCD_2ul.raw	F11		2.48	FALSE	0	0.1497	7270615040	96.42
		TRUE	High	Sequest HT (A2)	Unambiguous	[Y].GVSPTKLNDLcF.[T]	C11(Carbamidomethyl)	1	1	QHD43416.1_S2_RBD	QHD43416.1_S2_RBD	2	2	0.6011	0	1	1	675.841	1350.67	1350.67	1.86	0.00126	ETD (Electron Transfer Dissociation)	MS2	49.595	24.509	101.321	29294	200428_Lumos_(LC1200)_nanoFlex_Ieva_SARS_CoV2_i1_Chy_Chymo_90min_ETD_HCD_2ul.raw	F11		1.88	FALSE	0.002538	0.3212	8865811	101.89
		TRUE	Low	Sequest HT (A2)	Ambiguous	[Y].GVSPTKLNDLcF.[T]	C11(Carbamidomethyl)	1	1	QHD43416.1_S2_RBD	QHD43416.1_S2_RBD	2	2	0.3934	0	1	1	675.84	1350.67	1350.67	0.33	0.00022	ETD (Electron Transfer Dissociation)	MS2	0	86	113.182	33125	200428_Lumos_(LC1200)_nanoFlex_Ieva_SARS_CoV2_i1_Chy_Chymo_90min_ETD_HCD_2ul.raw	F11		1.22	FALSE	0.0674	0.6682
		TRUE	Low	Sequest HT (A2)	Ambiguous	[Y].GVSPTKLNDLcF.[T]	C11(Carbamidomethyl)	1	1	QHD43416.1_S2_RBD	QHD43416.1_S2_RBD	2	2	0.3839	0	1	1	675.84	1350.67	1350.67	0.24	0.00016	ETD (Electron Transfer Dissociation)	MS2	0	86	113.708	33283	200428_Lumos_(LC1200)_nanoFlex_Ieva_SARS_CoV2_i1_Chy_Chymo_90min_ETD_HCD_2ul.raw	F11		1.12	FALSE	0.1151	0.7879
		TRUE	Low	Sequest HT (A2)	Ambiguous	[Y].GVSPTKLNDLcF.[T]	C11(Carbamidomethyl)	1	1	QHD43416.1_S2_RBD	QHD43416.1_S2_RBD	2	2		0	2	2	675.84	1350.67	1350.67	-0.12	-8e-05	ETD (Electron Transfer Dissociation)	MS2	16.923	86	114.127	33412	200428_Lumos_(LC1200)_nanoFlex_Ieva_SARS_CoV2_i1_Chy_Chymo_90min_ETD_HCD_2ul.raw	F11		0.6	FALSE	0.7941	1
		TRUE	High	Sequest HT (A2)	Unambiguous	[Y].GVSPTKLNDLcF.[T]	C11(Carbamidomethyl)	1	1	QHD43416.1_S2_RBD	QHD43416.1_S2_RBD	2	2	0.595	0	1	1	675.84	1350.67	1350.67	0.24	0.00016	ETD (Electron Transfer Dissociation)	MS2	32.3678	86	114.528	33538	200428_Lumos_(LC1200)_nanoFlex_Ieva_SARS_CoV2_i1_Chy_Chymo_90min_ETD_HCD_2ul.raw	F11		1.21	FALSE	0.004195	0.3599
		TRUE	Low	Sequest HT (A2)	Ambiguous	[Y].GVSPTKLNDLcF.[T]	C11(Carbamidomethyl)	1	1	QHD43416.1_S2_RBD	QHD43416.1_S2_RBD	2	2	0.381	0	1	1	675.84	1350.67	1350.67	0.78	0.00053	ETD (Electron Transfer Dissociation)	MS2	0	86	114.876	33650	200428_Lumos_(LC1200)_nanoFlex_Ieva_SARS_CoV2_i1_Chy_Chymo_90min_ETD_HCD_2ul.raw	F11		0.84	FALSE	0.4368	0.9952
		TRUE	High	Sequest HT (A2)	Unambiguous	[Y].GVSPTKLNDLcF.[T]	C11(Carbamidomethyl)	1	1	QHD43416.1_S2_RBD	QHD43416.1_S2_RBD	2	2	0.5288	0	1	1	675.84	1350.67	1350.67	0.24	0.00016	ETD (Electron Transfer Dissociation)	MS2	19.8107	86	115.321	33792	200428_Lumos_(LC1200)_nanoFlex_Ieva_SARS_CoV2_i1_Chy_Chymo_90min_ETD_HCD_2ul.raw	F11		1.04	FALSE	0.009778	0.4418
		TRUE	High	Sequest HT (A2)	Unambiguous	[Y].GVSPTKLNDLcF.[T]	C11(Carbamidomethyl)	1	1	QHD43416.1_S2_RBD	QHD43416.1_S2_RBD	2	2	0.5108	0	1	1	675.84	1350.67	1350.67	0.33	0.00022	ETD (Electron Transfer Dissociation)	MS2	27.7829	86	115.696	33910	200428_Lumos_(LC1200)_nanoFlex_Ieva_SARS_CoV2_i1_Chy_Chymo_90min_ETD_HCD_2ul.raw	F11		1.39	FALSE	0.001755	0.2462
		TRUE	High	Sequest HT (A2)	Unambiguous	[Y].GVSPTKLNDLcF.[T]	C11(Carbamidomethyl)	1	1	QHD43416.1_S2_RBD	QHD43416.1_S2_RBD	2	2	0.5655	0	1	1	675.84	1350.67	1350.67	-0.12	-8e-05	ETD (Electron Transfer Dissociation)	MS2	6.71633	86	116.075	34027	200428_Lumos_(LC1200)_nanoFlex_Ieva_SARS_CoV2_i1_Chy_Chymo_90min_ETD_HCD_2ul.raw	F11		1.45	FALSE	0.001755	0.2443
		TRUE	High	Sequest HT (A2)	Unambiguous	[Y].GVSPTKLNDLcF.[T]	C11(Carbamidomethyl)	1	1	QHD43416.1_S2_RBD	QHD43416.1_S2_RBD	2	2	0.4317	0	1	1	675.84	1350.67	1350.67	-0.21	-0.00015	ETD (Electron Transfer Dissociation)	MS2	34.7064	86	116.644	34188	200428_Lumos_(LC1200)_nanoFlex_Ieva_SARS_CoV2_i1_Chy_Chymo_90min_ETD_HCD_2ul.raw	F11		1.39	FALSE	0.008235	0.4147
		TRUE	High	Sequest HT (A2)	Unambiguous	[Y].GVSPTKLNDLcF.[T]	C11(Carbamidomethyl)	1	1	QHD43416.1_S2_RBD	QHD43416.1_S2_RBD	2	2	0.5969	0	1	1	675.841	1350.67	1350.67	1.32	0.00089	ETD (Electron Transfer Dissociation)	MS2	58.7583	86	117.088	34323	200428_Lumos_(LC1200)_nanoFlex_Ieva_SARS_CoV2_i1_Chy_Chymo_90min_ETD_HCD_2ul.raw	F11		1.91	FALSE	0	0.1148
		TRUE	High	Sequest HT (A2)	Unambiguous	[Y].GVSPTKLNDLcF.[T]	C11(Carbamidomethyl)	1	1	QHD43416.1_S2_RBD	QHD43416.1_S2_RBD	2	2	0.6159	0	1	1	675.84	1350.67	1350.67	0.51	0.00034	ETD (Electron Transfer Dissociation)	MS2	0	86	117.463	34443	200428_Lumos_(LC1200)_nanoFlex_Ieva_SARS_CoV2_i1_Chy_Chymo_90min_ETD_HCD_2ul.raw	F11		1.51	FALSE	0	0.1247
		TRUE	Low	Sequest HT (A2)	Ambiguous	[Y].GVSPTKLNDLcF.[T]	C11(Carbamidomethyl)	1	1	QHD43416.1_S2_RBD	QHD43416.1_S2_RBD	2	2	0.3951	0	1	1	675.84	1350.67	1350.67	-0.21	-0.00015	ETD (Electron Transfer Dissociation)	MS2	10.0938	86	117.871	34574	200428_Lumos_(LC1200)_nanoFlex_Ieva_SARS_CoV2_i1_Chy_Chymo_90min_ETD_HCD_2ul.raw	F11		0.81	FALSE	0.1526	0.8195
		TRUE	High	Sequest HT (A2)	Unambiguous	[Y].GVSPTKLNDLcF.[T]	C11(Carbamidomethyl)	1	1	QHD43416.1_S2_RBD	QHD43416.1_S2_RBD	2	2	0.4958	0	1	1	675.84	1350.67	1350.67	0.42	0.00028	ETD (Electron Transfer Dissociation)	MS2	19.8551	86	118.309	34712	200428_Lumos_(LC1200)_nanoFlex_Ieva_SARS_CoV2_i1_Chy_Chymo_90min_ETD_HCD_2ul.raw	F11		1.19	FALSE	0.001755	0.2164	61761.2	118.24
		TRUE	High	Sequest HT (A2)	Unambiguous	[Y].GVSPTKLNDLcF.[T]	C11(Carbamidomethyl)	1	1	QHD43416.1_S2_RBD	QHD43416.1_S2_RBD	2	2	0.5562	0	1	1	675.84	1350.67	1350.67	0.51	0.00034	ETD (Electron Transfer Dissociation)	MS2	21.8379	86	118.72	34843	200428_Lumos_(LC1200)_nanoFlex_Ieva_SARS_CoV2_i1_Chy_Chymo_90min_ETD_HCD_2ul.raw	F11		1.69	FALSE	0.0009067	0.1593	53158.8	119.19
		TRUE	Low	Sequest HT (A2)	Ambiguous	[Y].GVSPTKLNDLcF.[T]	C11(Carbamidomethyl)	1	1	QHD43416.1_S2_RBD	QHD43416.1_S2_RBD	2	2	0.354	0	1	1	675.839	1350.67	1350.67	-0.85	-0.00057	ETD (Electron Transfer Dissociation)	MS2	50.2087	86	119.555	35103	200428_Lumos_(LC1200)_nanoFlex_Ieva_SARS_CoV2_i1_Chy_Chymo_90min_ETD_HCD_2ul.raw	F11		1.13	FALSE	0.06805	0.6748
		TRUE	Low	Sequest HT (A2)	Ambiguous	[Y].GVSPTKLNDLcF.[T]	C11(Carbamidomethyl)	1	1	QHD43416.1_S2_RBD	QHD43416.1_S2_RBD	2	2	0.5288	0	1	1	675.84	1350.67	1350.67	0.33	0.00022	ETD (Electron Transfer Dissociation)	MS2	32.603	86	119.957	35221	200428_Lumos_(LC1200)_nanoFlex_Ieva_SARS_CoV2_i1_Chy_Chymo_90min_ETD_HCD_2ul.raw	F11		1.04	FALSE	0.2424	0.9047
		TRUE	Low	Sequest HT (A14)	Ambiguous	[Y].GVSPTKLNDLcF.[T]	C11(Carbamidomethyl)	1	1	QHD43416.1_S2_RBD	QHD43416.1_S2_RBD	2	2	0.2869	0	1	1	675.84	1350.67	1350.67	0.33	0.00022	ETD (Electron Transfer Dissociation)	MS2	0	86	113.182	33125	200428_Lumos_(LC1200)_nanoFlex_Ieva_SARS_CoV2_i1_Chy_Chymo_90min_ETD_HCD_2ul.raw	F11		1.22	FALSE	0.4123	0.8625
		TRUE	Low	Sequest HT (A14)	Ambiguous	[Y].GVSPTKLNDLcF.[T]	C11(Carbamidomethyl)	1	1	QHD43416.1_S2_RBD	QHD43416.1_S2_RBD	2	2	0.3036	0	1	1	675.84	1350.67	1350.67	0.24	0.00016	ETD (Electron Transfer Dissociation)	MS2	0	86	113.708	33283	200428_Lumos_(LC1200)_nanoFlex_Ieva_SARS_CoV2_i1_Chy_Chymo_90min_ETD_HCD_2ul.raw	F11		1.12	FALSE	0.6406	0.9842
		TRUE	Low	Sequest HT (A14)	Ambiguous	[Y].GVSPTKLNDLcF.[T]	C11(Carbamidomethyl)	1	1	QHD43416.1_S2_RBD	QHD43416.1_S2_RBD	2	2		0.0164	3	3	675.84	1350.67	1350.67	-0.12	-8e-05	ETD (Electron Transfer Dissociation)	MS2	16.923	86	114.127	33412	200428_Lumos_(LC1200)_nanoFlex_Ieva_SARS_CoV2_i1_Chy_Chymo_90min_ETD_HCD_2ul.raw	F11		0.6	FALSE	0.8676	1
		TRUE	Low	Sequest HT (A14)	Ambiguous	[Y].GVSPTKLNDLcF.[T]	C11(Carbamidomethyl)	1	1	QHD43416.1_S2_RBD	QHD43416.1_S2_RBD	2	2	0.0952	0	1	1	675.84	1350.67	1350.67	0.78	0.00053	ETD (Electron Transfer Dissociation)	MS2	0	86	114.876	33650	200428_Lumos_(LC1200)_nanoFlex_Ieva_SARS_CoV2_i1_Chy_Chymo_90min_ETD_HCD_2ul.raw	F11		0.84	FALSE	0.4579	0.8867
		TRUE	Low	Sequest HT (A14)	Ambiguous	[Y].GVSPTKLNDLcF.[T]	C11(Carbamidomethyl)	1	1	QHD43416.1_S2_RBD	QHD43416.1_S2_RBD	2	2	0.0988	0	1	1	675.84	1350.67	1350.67	-0.21	-0.00015	ETD (Electron Transfer Dissociation)	MS2	10.0938	86	117.871	34574	200428_Lumos_(LC1200)_nanoFlex_Ieva_SARS_CoV2_i1_Chy_Chymo_90min_ETD_HCD_2ul.raw	F11		0.81	FALSE	0.7078	1
		TRUE	Low	Sequest HT (A14)	Ambiguous	[Y].GVSPTKLNDLcF.[T]	C11(Carbamidomethyl)	1	1	QHD43416.1_S2_RBD	QHD43416.1_S2_RBD	2	2	0.1062	0	1	1	675.839	1350.67	1350.67	-0.85	-0.00057	ETD (Electron Transfer Dissociation)	MS2	50.2087	86	119.555	35103	200428_Lumos_(LC1200)_nanoFlex_Ieva_SARS_CoV2_i1_Chy_Chymo_90min_ETD_HCD_2ul.raw	F11		1.13	FALSE	0.5922	0.9656
		TRUE	Low	Sequest HT (A14)	Ambiguous	[Y].GVSPTKLNDLcF.[T]	C11(Carbamidomethyl)	1	1	QHD43416.1_S2_RBD	QHD43416.1_S2_RBD	2	2	0.3077	0	1	1	675.84	1350.67	1350.67	0.33	0.00022	ETD (Electron Transfer Dissociation)	MS2	32.603	86	119.957	35221	200428_Lumos_(LC1200)_nanoFlex_Ieva_SARS_CoV2_i1_Chy_Chymo_90min_ETD_HCD_2ul.raw	F11		1.04	FALSE	0.7069	1
		TRUE	High	Sequest HT (A16)	Unambiguous	[Y].GVSPTKLNDLcF.[T]	C11(Carbamidomethyl)	1	1	QHD43416.1_S2_RBD	QHD43416.1_S2_RBD	2	2	0.4608	0	1	1	675.84	1350.67	1350.67	0.33	0.00022	HCD (High Energy Collision Dissociation)	MS2	39.9293	1.719	96.2128	27697	200428_Lumos_(LC1200)_nanoFlex_Ieva_SARS_CoV2_i1_Chy_Chymo_90min_ETD_HCD_2ul.raw	F11		3.19	FALSE	0	0.03173	7270615040	96.42
		TRUE	High	Sequest HT (A16)	Unambiguous	[Y].GVSPTKLNDLcF.[T]	C11(Carbamidomethyl)	1	1	QHD43416.1_S2_RBD	QHD43416.1_S2_RBD	2	2	0.3822	0	1	1	675.84	1350.67	1350.67	0.24	0.00016	HCD (High Energy Collision Dissociation)	MS2	0.15006	0.054	96.5534	27799	200428_Lumos_(LC1200)_nanoFlex_Ieva_SARS_CoV2_i1_Chy_Chymo_90min_ETD_HCD_2ul.raw	F11		2.25	FALSE	0.003547	0.2162	7270615040	96.42
		TRUE	High	Sequest HT (A16)	Unambiguous	[Y].GVSPTKLNDLcF.[T]	C11(Carbamidomethyl)	1	1	QHD43416.1_S2_RBD	QHD43416.1_S2_RBD	2	2	0.4398	0	1	1	675.84	1350.67	1350.67	0.33	0.00022	HCD (High Energy Collision Dissociation)	MS2	0	0.064	96.8965	27886	200428_Lumos_(LC1200)_nanoFlex_Ieva_SARS_CoV2_i1_Chy_Chymo_90min_ETD_HCD_2ul.raw	F11		2.66	FALSE	0	0.03778	7270615040	96.42
		TRUE	High	Sequest HT (A16)	Unambiguous	[Y].GVSPTKLNDLcF.[T]	C11(Carbamidomethyl)	1	1	QHD43416.1_S2_RBD	QHD43416.1_S2_RBD	2	2	0.4231	0	1	1	675.84	1350.67	1350.67	0.87	0.00059	HCD (High Energy Collision Dissociation)	MS2	0	0.085	97.2399	27981	200428_Lumos_(LC1200)_nanoFlex_Ieva_SARS_CoV2_i1_Chy_Chymo_90min_ETD_HCD_2ul.raw	F11		2.6	FALSE	0	0.05083	7270615040	96.42
		TRUE	High	Sequest HT (A16)	Unambiguous	[Y].GVSPTKLNDLcF.[T]	C11(Carbamidomethyl)	1	1	QHD43416.1_S2_RBD	QHD43416.1_S2_RBD	2	2	0.3548	0	1	1	675.84	1350.67	1350.67	0.6	0.0004	HCD (High Energy Collision Dissociation)	MS2	0.409319	0.123	97.5925	28095	200428_Lumos_(LC1200)_nanoFlex_Ieva_SARS_CoV2_i1_Chy_Chymo_90min_ETD_HCD_2ul.raw	F11		2.17	FALSE	0.002712	0.2068	7270615040	96.42
		TRUE	High	Sequest HT (A16)	Unambiguous	[Y].GVSPTKLNDLcF.[T]	C11(Carbamidomethyl)	1	1	QHD43416.1_S2_RBD	QHD43416.1_S2_RBD	2	2	0.4085	0	1	1	675.841	1350.67	1350.67	1.5	0.00101	HCD (High Energy Collision Dissociation)	MS2	0.194208	0.185	97.9498	28204	200428_Lumos_(LC1200)_nanoFlex_Ieva_SARS_CoV2_i1_Chy_Chymo_90min_ETD_HCD_2ul.raw	F11		2.35	FALSE	0.0009362	0.1215	7270615040	96.42
		TRUE	High	Sequest HT (A16)	Unambiguous	[Y].GVSPTKLNDLcF.[T]	C11(Carbamidomethyl)	1	1	QHD43416.1_S2_RBD	QHD43416.1_S2_RBD	2	2	0.4843	0	1	1	675.84	1350.67	1350.67	0.06	4e-05	HCD (High Energy Collision Dissociation)	MS2	0.61459	1.319	98.3075	28323	200428_Lumos_(LC1200)_nanoFlex_Ieva_SARS_CoV2_i1_Chy_Chymo_90min_ETD_HCD_2ul.raw	F11		2.87	FALSE	0.0009362	0.1212	7270615040	96.42
		TRUE	High	Sequest HT (A16)	Unambiguous	[Y].GVSPTKLNDLcF.[T]	C11(Carbamidomethyl)	1	1	QHD43416.1_S2_RBD	QHD43416.1_S2_RBD	2	2	0.3689	0	1	1	675.84	1350.67	1350.67	0.33	0.00022	HCD (High Energy Collision Dissociation)	MS2	6.35315	7.103	98.6999	28451	200428_Lumos_(LC1200)_nanoFlex_Ieva_SARS_CoV2_i1_Chy_Chymo_90min_ETD_HCD_2ul.raw	F11		2.25	FALSE	0.00437	0.2648	7270615040	96.42
		TRUE	High	Sequest HT (A16)	Unambiguous	[Y].GVSPTKLNDLcF.[T]	C11(Carbamidomethyl)	1	1	QHD43416.1_S2_RBD	QHD43416.1_S2_RBD	2	2	0.3256	0	1	1	675.84	1350.67	1350.67	0.15	0.0001	HCD (High Energy Collision Dissociation)	MS2	26.9748	14.78	99.0912	28573	200428_Lumos_(LC1200)_nanoFlex_Ieva_SARS_CoV2_i1_Chy_Chymo_90min_ETD_HCD_2ul.raw	F11		2.15	FALSE	0.001846	0.1771	7270615040	96.42
		TRUE	Medium	Sequest HT (A16)	Ambiguous	[Y].GVSPTKLNDLcF.[T]	C11(Carbamidomethyl)	1	1	QHD43416.1_S2_RBD	QHD43416.1_S2_RBD	2	2	0.4068	0	1	1	675.84	1350.67	1350.67	-0.31	-0.00021	HCD (High Energy Collision Dissociation)	MS2	38.2757	16.572	99.5028	28704	200428_Lumos_(LC1200)_nanoFlex_Ieva_SARS_CoV2_i1_Chy_Chymo_90min_ETD_HCD_2ul.raw	F11		2.36	FALSE	0.02655	0.4578	7270615040	96.42
		TRUE	Low	Sequest HT (A16)	Ambiguous	[Y].GVSPTKLNDLcF.[T]	C11(Carbamidomethyl)	1	1	QHD43416.1_S2_RBD	QHD43416.1_S2_RBD	2	2	0.1809	0	1	1	675.84	1350.67	1350.67	0.24	0.00016	HCD (High Energy Collision Dissociation)	MS2	59.5042	21.454	99.9555	28849	200428_Lumos_(LC1200)_nanoFlex_Ieva_SARS_CoV2_i1_Chy_Chymo_90min_ETD_HCD_2ul.raw	F11		1.88	FALSE	0.1004	0.6842	7270615040	96.42
		TRUE	Low	Sequest HT (A16)	Ambiguous	[Y].GVSPTKLNDLcF.[T]	C11(Carbamidomethyl)	1	1	QHD43416.1_S2_RBD	QHD43416.1_S2_RBD	2	2	0.3265	0	1	1	675.841	1350.67	1350.67	1.86	0.00126	HCD (High Energy Collision Dissociation)	MS2	49.595	13.656	101.333	29297	200428_Lumos_(LC1200)_nanoFlex_Ieva_SARS_CoV2_i1_Chy_Chymo_90min_ETD_HCD_2ul.raw	F11		1.96	FALSE	0.3689	0.903	8865811	101.89
		TRUE	Low	Sequest HT (A16)	Ambiguous	[Y].GVSPTKLNDLcF.[T]	C11(Carbamidomethyl)	1	1	QHD43416.1_S2_RBD	QHD43416.1_S2_RBD	2	2	0.1912	0	1	1	675.84	1350.67	1350.67	0.33	0.00022	HCD (High Energy Collision Dissociation)	MS2	0	54	113.193	33128	200428_Lumos_(LC1200)_nanoFlex_Ieva_SARS_CoV2_i1_Chy_Chymo_90min_ETD_HCD_2ul.raw	F11		0.68	FALSE	0.835	1
		TRUE	Low	Sequest HT (A16)	Ambiguous	[Y].GVSPTKLNDLcF.[T]	C11(Carbamidomethyl)	1	1	QHD43416.1_S2_RBD	QHD43416.1_S2_RBD	2	2	0.3875	0	1	1	675.84	1350.67	1350.67	0.24	0.00016	HCD (High Energy Collision Dissociation)	MS2	0	54	113.718	33285	200428_Lumos_(LC1200)_nanoFlex_Ieva_SARS_CoV2_i1_Chy_Chymo_90min_ETD_HCD_2ul.raw	F11		0.8	FALSE	0.3797	0.9069
		TRUE	Low	Sequest HT (A16)	Ambiguous	[Y].GVSPTKLNDLcF.[T]	C11(Carbamidomethyl)	1	1	QHD43416.1_S2_RBD	QHD43416.1_S2_RBD	2	2	0.3231	0	1	1	675.84	1350.67	1350.67	0.78	0.00053	HCD (High Energy Collision Dissociation)	MS2	0	54	114.885	33651	200428_Lumos_(LC1200)_nanoFlex_Ieva_SARS_CoV2_i1_Chy_Chymo_90min_ETD_HCD_2ul.raw	F11		0.65	FALSE	0.8864	1
		TRUE	Low	Sequest HT (A16)	Ambiguous	[Y].GVSPTKLNDLcF.[T]	C11(Carbamidomethyl)	1	1	QHD43416.1_S2_RBD	QHD43416.1_S2_RBD	2	2	0.3194	0	1	1	675.84	1350.67	1350.67	0.24	0.00016	HCD (High Energy Collision Dissociation)	MS2	19.8107	54	115.329	33794	200428_Lumos_(LC1200)_nanoFlex_Ieva_SARS_CoV2_i1_Chy_Chymo_90min_ETD_HCD_2ul.raw	F11		0.72	FALSE	0.9334	1
		TRUE	Low	Sequest HT (A16)	Ambiguous	[Y].GVSPTKLNDLcF.[T]	C11(Carbamidomethyl)	1	1	QHD43416.1_S2_RBD	QHD43416.1_S2_RBD	2	2	0.5055	0	1	1	675.84	1350.67	1350.67	0.33	0.00022	HCD (High Energy Collision Dissociation)	MS2	27.7829	54	115.707	33912	200428_Lumos_(LC1200)_nanoFlex_Ieva_SARS_CoV2_i1_Chy_Chymo_90min_ETD_HCD_2ul.raw	F11		0.91	FALSE	0.6751	1
		TRUE	Low	Sequest HT (A16)	Ambiguous	[Y].GVSPTKLNDLcF.[T]	C11(Carbamidomethyl)	1	1	QHD43416.1_S2_RBD	QHD43416.1_S2_RBD	2	2	0.1882	0	1	1	675.84	1350.67	1350.67	-0.12	-8e-05	HCD (High Energy Collision Dissociation)	MS2	6.71633	54	116.087	34028	200428_Lumos_(LC1200)_nanoFlex_Ieva_SARS_CoV2_i1_Chy_Chymo_90min_ETD_HCD_2ul.raw	F11		0.85	FALSE	0.5388	0.9789
		TRUE	Low	Sequest HT (A16)	Ambiguous	[Y].GVSPTKLNDLcF.[T]	C11(Carbamidomethyl)	1	1	QHD43416.1_S2_RBD	QHD43416.1_S2_RBD	2	2	0.4286	0	1	1	675.841	1350.67	1350.67	1.32	0.00089	HCD (High Energy Collision Dissociation)	MS2	58.7583	54	117.096	34325	200428_Lumos_(LC1200)_nanoFlex_Ieva_SARS_CoV2_i1_Chy_Chymo_90min_ETD_HCD_2ul.raw	F11		1.12	FALSE	0.7317	1
		TRUE	Low	Sequest HT (A16)	Ambiguous	[Y].GVSPTKLNDLcF.[T]	C11(Carbamidomethyl)	1	1	QHD43416.1_S2_RBD	QHD43416.1_S2_RBD	2	2	0.1613	0	1	1	675.84	1350.67	1350.67	0.51	0.00034	HCD (High Energy Collision Dissociation)	MS2	0	54	117.47	34445	200428_Lumos_(LC1200)_nanoFlex_Ieva_SARS_CoV2_i1_Chy_Chymo_90min_ETD_HCD_2ul.raw	F11		0.62	FALSE	0.6382	0.9985
		TRUE	Low	Sequest HT (A16)	Ambiguous	[Y].GVSPTKLNDLcF.[T]	C11(Carbamidomethyl)	1	1	QHD43416.1_S2_RBD	QHD43416.1_S2_RBD	2	2	0.225	0	1	1	675.84	1350.67	1350.67	-0.21	-0.00015	HCD (High Energy Collision Dissociation)	MS2	10.0938	54	117.881	34576	200428_Lumos_(LC1200)_nanoFlex_Ieva_SARS_CoV2_i1_Chy_Chymo_90min_ETD_HCD_2ul.raw	F11		0.8	FALSE	0.5562	0.9831
		TRUE	Low	Sequest HT (A16)	Ambiguous	[Y].GVSPTKLNDLcF.[T]	C11(Carbamidomethyl)	1	1	QHD43416.1_S2_RBD	QHD43416.1_S2_RBD	2	2	0.4368	0	1	1	675.84	1350.67	1350.67	0.42	0.00028	HCD (High Energy Collision Dissociation)	MS2	19.8551	54	118.319	34714	200428_Lumos_(LC1200)_nanoFlex_Ieva_SARS_CoV2_i1_Chy_Chymo_90min_ETD_HCD_2ul.raw	F11		0.87	FALSE	0.4775	0.9554	61761.2	118.24
		TRUE	Low	Sequest HT (A16)	Ambiguous	[Y].GVSPTKLNDLcF.[T]	C11(Carbamidomethyl)	1	1	QHD43416.1_S2_RBD	QHD43416.1_S2_RBD	2	2	0.4766	0	1	1	675.84	1350.67	1350.67	0.51	0.00034	HCD (High Energy Collision Dissociation)	MS2	21.8379	54	118.731	34845	200428_Lumos_(LC1200)_nanoFlex_Ieva_SARS_CoV2_i1_Chy_Chymo_90min_ETD_HCD_2ul.raw	F11		1.07	FALSE	0.7104	1
		TRUE	Low	Sequest HT (A16)	Ambiguous	[Y].GVSPTKLNDLcF.[T]	C11(Carbamidomethyl)	1	1	QHD43416.1_S2_RBD	QHD43416.1_S2_RBD	2	2	0.4752	0	1	1	675.839	1350.67	1350.67	-0.85	-0.00057	HCD (High Energy Collision Dissociation)	MS2	50.2087	54	119.566	35105	200428_Lumos_(LC1200)_nanoFlex_Ieva_SARS_CoV2_i1_Chy_Chymo_90min_ETD_HCD_2ul.raw	F11		1.01	FALSE	0.7971	1
		TRUE	Low	Sequest HT (A16)	Ambiguous	[Y].GVSPTKLNDLcF.[T]	C11(Carbamidomethyl)	1	1	QHD43416.1_S2_RBD	QHD43416.1_S2_RBD	2	2	0.4891	0	1	1	675.84	1350.67	1350.67	0.33	0.00022	HCD (High Energy Collision Dissociation)	MS2	32.603	54	119.969	35224	200428_Lumos_(LC1200)_nanoFlex_Ieva_SARS_CoV2_i1_Chy_Chymo_90min_ETD_HCD_2ul.raw	F11		0.92	FALSE	0.6231	0.9955
		TRUE	Low	Sequest HT (A18)	Ambiguous	[Y].GVSPTKLNDLcF.[T]	C11(Carbamidomethyl)	1	1	QHD43416.1_S2_RBD	QHD43416.1_S2_RBD	2	2	0.3347	0	1	1	675.84	1350.67	1350.67	-0.31	-0.00021	HCD (High Energy Collision Dissociation)	MS2	38.2757	16.572	99.5028	28704	200428_Lumos_(LC1200)_nanoFlex_Ieva_SARS_CoV2_i1_Chy_Chymo_90min_ETD_HCD_2ul.raw	F11		2.36	FALSE	0.3425	0.8527	7270615040	96.42
		TRUE	Low	Sequest HT (A18)	Ambiguous	[Y].GVSPTKLNDLcF.[T]	C11(Carbamidomethyl)	1	1	QHD43416.1_S2_RBD	QHD43416.1_S2_RBD	2	2	0.1809	0	1	1	675.84	1350.67	1350.67	0.24	0.00016	HCD (High Energy Collision Dissociation)	MS2	59.5042	21.454	99.9555	28849	200428_Lumos_(LC1200)_nanoFlex_Ieva_SARS_CoV2_i1_Chy_Chymo_90min_ETD_HCD_2ul.raw	F11		1.88	FALSE	0.3672	0.8782	7270615040	96.42
		TRUE	Low	Sequest HT (A18)	Ambiguous	[Y].GVSPTKLNDLcF.[T]	C11(Carbamidomethyl)	1	1	QHD43416.1_S2_RBD	QHD43416.1_S2_RBD	2	2	0.1173	0	1	1	675.841	1350.67	1350.67	1.86	0.00126	HCD (High Energy Collision Dissociation)	MS2	49.595	13.656	101.333	29297	200428_Lumos_(LC1200)_nanoFlex_Ieva_SARS_CoV2_i1_Chy_Chymo_90min_ETD_HCD_2ul.raw	F11		1.96	FALSE	0.3723	0.8805	8865811	101.89
		TRUE	Low	Sequest HT (A18)	Ambiguous	[Y].GVSPTKLNDLcF.[T]	C11(Carbamidomethyl)	1	1	QHD43416.1_S2_RBD	QHD43416.1_S2_RBD	2	2	0.0147	0	1	1	675.84	1350.67	1350.67	0.33	0.00022	HCD (High Energy Collision Dissociation)	MS2	0	54	113.193	33128	200428_Lumos_(LC1200)_nanoFlex_Ieva_SARS_CoV2_i1_Chy_Chymo_90min_ETD_HCD_2ul.raw	F11		0.68	FALSE	0.9722	1
		TRUE	Low	Sequest HT (A18)	Ambiguous	[Y].GVSPTKLNDLcF.[T]	C11(Carbamidomethyl)	1	1	QHD43416.1_S2_RBD	QHD43416.1_S2_RBD	2	2	0.05	0	1	1	675.84	1350.67	1350.67	0.24	0.00016	HCD (High Energy Collision Dissociation)	MS2	0	54	113.718	33285	200428_Lumos_(LC1200)_nanoFlex_Ieva_SARS_CoV2_i1_Chy_Chymo_90min_ETD_HCD_2ul.raw	F11		0.8	FALSE	0.8376	1
		TRUE	Low	Sequest HT (A18)	Ambiguous	[Y].GVSPTKLNDLcF.[T]	C11(Carbamidomethyl)	1	1	QHD43416.1_S2_RBD	QHD43416.1_S2_RBD	2	2	0.0615	0	1	1	675.84	1350.67	1350.67	0.78	0.00053	HCD (High Energy Collision Dissociation)	MS2	0	54	114.885	33651	200428_Lumos_(LC1200)_nanoFlex_Ieva_SARS_CoV2_i1_Chy_Chymo_90min_ETD_HCD_2ul.raw	F11		0.65	FALSE	0.9717	1
		TRUE	Low	Sequest HT (A18)	Ambiguous	[Y].GVSPTKLNDLcF.[T]	C11(Carbamidomethyl)	1	1	QHD43416.1_S2_RBD	QHD43416.1_S2_RBD	2	2	0.0139	0	1	1	675.84	1350.67	1350.67	0.24	0.00016	HCD (High Energy Collision Dissociation)	MS2	19.8107	54	115.329	33794	200428_Lumos_(LC1200)_nanoFlex_Ieva_SARS_CoV2_i1_Chy_Chymo_90min_ETD_HCD_2ul.raw	F11		0.72	FALSE	0.9722	1
		TRUE	Low	Sequest HT (A18)	Ambiguous	[Y].GVSPTKLNDLcF.[T]	C11(Carbamidomethyl)	1	1	QHD43416.1_S2_RBD	QHD43416.1_S2_RBD	2	2	0.011	0	1	1	675.84	1350.67	1350.67	0.33	0.00022	HCD (High Energy Collision Dissociation)	MS2	27.7829	54	115.707	33912	200428_Lumos_(LC1200)_nanoFlex_Ieva_SARS_CoV2_i1_Chy_Chymo_90min_ETD_HCD_2ul.raw	F11		0.91	FALSE	0.8822	1
		TRUE	Low	Sequest HT (A18)	Ambiguous	[Y].GVSPTKLNDLcF.[T]	C11(Carbamidomethyl)	1	1	QHD43416.1_S2_RBD	QHD43416.1_S2_RBD	2	2	0.1529	0	1	1	675.84	1350.67	1350.67	-0.12	-8e-05	HCD (High Energy Collision Dissociation)	MS2	6.71633	54	116.087	34028	200428_Lumos_(LC1200)_nanoFlex_Ieva_SARS_CoV2_i1_Chy_Chymo_90min_ETD_HCD_2ul.raw	F11		0.85	FALSE	0.9559	1
		TRUE	Low	Sequest HT (A18)	Ambiguous	[Y].GVSPTKLNDLcF.[T]	C11(Carbamidomethyl)	1	1	QHD43416.1_S2_RBD	QHD43416.1_S2_RBD	2	2	0.2589	0	1	1	675.841	1350.67	1350.67	1.32	0.00089	HCD (High Energy Collision Dissociation)	MS2	58.7583	54	117.096	34325	200428_Lumos_(LC1200)_nanoFlex_Ieva_SARS_CoV2_i1_Chy_Chymo_90min_ETD_HCD_2ul.raw	F11		1.12	FALSE	0.8615	1
		TRUE	Low	Sequest HT (A18)	Ambiguous	[Y].GVSPTKLNDLcF.[T]	C11(Carbamidomethyl)	1	1	QHD43416.1_S2_RBD	QHD43416.1_S2_RBD	2	2	0.0575	0	1	1	675.84	1350.67	1350.67	0.42	0.00028	HCD (High Energy Collision Dissociation)	MS2	19.8551	54	118.319	34714	200428_Lumos_(LC1200)_nanoFlex_Ieva_SARS_CoV2_i1_Chy_Chymo_90min_ETD_HCD_2ul.raw	F11		0.87	FALSE	0.8615	1	61761.2	118.24
		TRUE	Low	Sequest HT (A18)	Ambiguous	[Y].GVSPTKLNDLcF.[T]	C11(Carbamidomethyl)	1	1	QHD43416.1_S2_RBD	QHD43416.1_S2_RBD	2	2	0.1028	0	1	1	675.84	1350.67	1350.67	0.51	0.00034	HCD (High Energy Collision Dissociation)	MS2	21.8379	54	118.731	34845	200428_Lumos_(LC1200)_nanoFlex_Ieva_SARS_CoV2_i1_Chy_Chymo_90min_ETD_HCD_2ul.raw	F11		1.07	FALSE	0.937	1
		TRUE	Low	Sequest HT (A18)	Ambiguous	[Y].GVSPTKLNDLcF.[T]	C11(Carbamidomethyl)	1	1	QHD43416.1_S2_RBD	QHD43416.1_S2_RBD	2	2	0.0435	0	1	1	675.84	1350.67	1350.67	0.33	0.00022	HCD (High Energy Collision Dissociation)	MS2	32.603	54	119.969	35224	200428_Lumos_(LC1200)_nanoFlex_Ieva_SARS_CoV2_i1_Chy_Chymo_90min_ETD_HCD_2ul.raw	F11		0.92	FALSE	0.9402	1
	TRUE	High	[Y].GVSPTKLNDLCF.[T]	1xCarbamidomethyl [C11]; 1xDeamidated [N8]		FALSE	0.00354179	0	1	1	12	QHD43416.1_S2_RBD	QHD43416.1_S2_RBD [208-219]	2	1351.66	992910372		High	High	0	0.004621	3.93	105.21
		Checked	Confidence	Identifying Node	PSM Ambiguity	Annotated Sequence	Modifications	# Protein Groups	# Proteins	Master Protein Accessions	Protein Accessions	# Missed Cleavages	Charge	DeltaScore	DeltaCn	Rank	Search Engine Rank	m/z [Da]	MH+ [Da]	Theo. MH+ [Da]	DeltaM [ppm]	Deltam/z [Da]	Activation Type	MS Order	Isolation Interference [%]	Ion Inject Time [ms]	RT [min]	First Scan	Spectrum File	File ID	Quan Info	XCorr	Contaminant	Percolator q-Value	Percolator PEP	Precursor Abundance	Apex RT [min]
		TRUE	High	Sequest HT (A2)	Unambiguous	[Y].GVSPTKLnDLcF.[T]	N8(Deamidated); C11(Carbamidomethyl)	1	1	QHD43416.1_S2_RBD	QHD43416.1_S2_RBD	2	2	0.662	0	1	1	676.333	1351.66	1351.66	1.13	0.00077	ETD (Electron Transfer Dissociation)	MS2	89.438	28.864	102.526	29686	200428_Lumos_(LC1200)_nanoFlex_Ieva_SARS_CoV2_i1_Chy_Chymo_90min_ETD_HCD_2ul.raw	F11		2.16	FALSE	0	0.1244	79350880	102.67
		TRUE	High	Sequest HT (A2)	Unambiguous	[Y].GVSPTKLnDLcF.[T]	N8(Deamidated); C11(Carbamidomethyl)	1	1	QHD43416.1_S2_RBD	QHD43416.1_S2_RBD	2	2	0.6866	0	1	1	676.332	1351.66	1351.66	0.59	0.0004	ETD (Electron Transfer Dissociation)	MS2	36.5669	39.527	103.694	30068	200428_Lumos_(LC1200)_nanoFlex_Ieva_SARS_CoV2_i1_Chy_Chymo_90min_ETD_HCD_2ul.raw	F11		2.68	FALSE	0	0.01563	216779824	104
		TRUE	High	Sequest HT (A2)	Unambiguous	[Y].GVSPTKLnDLcF.[T]	N8(Deamidated); C11(Carbamidomethyl)	1	1	QHD43416.1_S2_RBD	QHD43416.1_S2_RBD	2	2	0.6423	0	1	1	676.332	1351.66	1351.66	0.32	0.00022	ETD (Electron Transfer Dissociation)	MS2	0.832229	1.013	104.071	30188	200428_Lumos_(LC1200)_nanoFlex_Ieva_SARS_CoV2_i1_Chy_Chymo_90min_ETD_HCD_2ul.raw	F11		2.46	FALSE	0	0.03822	216779824	104
		TRUE	High	Sequest HT (A2)	Unambiguous	[Y].GVSPTKLnDLcF.[T]	N8(Deamidated); C11(Carbamidomethyl)	1	1	QHD43416.1_S2_RBD	QHD43416.1_S2_RBD	2	2	0.6899	0	1	1	676.332	1351.66	1351.66	0.68	0.00046	ETD (Electron Transfer Dissociation)	MS2	29.0138	16.28	105.033	30496	200428_Lumos_(LC1200)_nanoFlex_Ieva_SARS_CoV2_i1_Chy_Chymo_90min_ETD_HCD_2ul.raw	F11		2.58	FALSE	0	0.03714	692759616	105.21
		TRUE	High	Sequest HT (A2)	Unambiguous	[Y].GVSPTKLnDLcF.[T]	N8(Deamidated); C11(Carbamidomethyl)	1	1	QHD43416.1_S2_RBD	QHD43416.1_S2_RBD	2	2	0.668	0	1	1	676.332	1351.66	1351.66	0.86	0.00058	ETD (Electron Transfer Dissociation)	MS2	0.245642	1.31	105.401	30615	200428_Lumos_(LC1200)_nanoFlex_Ieva_SARS_CoV2_i1_Chy_Chymo_90min_ETD_HCD_2ul.raw	F11		2.41	FALSE	0	0.05009	692759616	105.21
		TRUE	High	Sequest HT (A2)	Unambiguous	[Y].GVSPTKLnDLcF.[T]	N8(Deamidated); C11(Carbamidomethyl)	1	1	QHD43416.1_S2_RBD	QHD43416.1_S2_RBD	2	2	0.6278	0	1	1	676.332	1351.66	1351.66	0.77	0.00052	ETD (Electron Transfer Dissociation)	MS2	7.92732	23.734	107.448	31259	200428_Lumos_(LC1200)_nanoFlex_Ieva_SARS_CoV2_i1_Chy_Chymo_90min_ETD_HCD_2ul.raw	F11		2.23	FALSE	0	0.03891	4020052	107.41
		TRUE	High	Sequest HT (A16)	Unambiguous	[Y].GVSPTKLnDLcF.[T]	N8(Deamidated); C11(Carbamidomethyl)	1	1	QHD43416.1_S2_RBD	QHD43416.1_S2_RBD	2	2	0.1786	0	1	1	676.333	1351.66	1351.66	1.13	0.00077	HCD (High Energy Collision Dissociation)	MS2	89.438	10.083	102.537	29689	200428_Lumos_(LC1200)_nanoFlex_Ieva_SARS_CoV2_i1_Chy_Chymo_90min_ETD_HCD_2ul.raw	F11		1.68	FALSE	0.002712	0.2029	79350880	102.67
		TRUE	High	Sequest HT (A16)	Unambiguous	[Y].GVSPTKLnDLcF.[T]	N8(Deamidated); C11(Carbamidomethyl)	1	1	QHD43416.1_S2_RBD	QHD43416.1_S2_RBD	2	2	0.4366	0	1	1	676.332	1351.66	1351.66	0.59	0.0004	HCD (High Energy Collision Dissociation)	MS2	36.5669	12.804	103.706	30071	200428_Lumos_(LC1200)_nanoFlex_Ieva_SARS_CoV2_i1_Chy_Chymo_90min_ETD_HCD_2ul.raw	F11		2.68	FALSE	0.002712	0.1933	216779824	104
		TRUE	High	Sequest HT (A16)	Unambiguous	[Y].GVSPTKLnDLcF.[T]	N8(Deamidated); C11(Carbamidomethyl)	1	1	QHD43416.1_S2_RBD	QHD43416.1_S2_RBD	2	2	0.4859	0	1	1	676.332	1351.66	1351.66	0.32	0.00022	HCD (High Energy Collision Dissociation)	MS2	0.832229	1.144	104.08	30190	200428_Lumos_(LC1200)_nanoFlex_Ieva_SARS_CoV2_i1_Chy_Chymo_90min_ETD_HCD_2ul.raw	F11		3.19	FALSE	0	0.05676	216779824	104
		TRUE	High	Sequest HT (A16)	Unambiguous	[Y].GVSPTKLnDLcF.[T]	N8(Deamidated); C11(Carbamidomethyl)	1	1	QHD43416.1_S2_RBD	QHD43416.1_S2_RBD	2	2	0.5471	0	1	1	676.332	1351.66	1351.66	0.68	0.00046	HCD (High Energy Collision Dissociation)	MS2	29.0138	10.516	105.043	30498	200428_Lumos_(LC1200)_nanoFlex_Ieva_SARS_CoV2_i1_Chy_Chymo_90min_ETD_HCD_2ul.raw	F11		3.93	FALSE	0	0.004621	692759616	105.21
		TRUE	High	Sequest HT (A16)	Unambiguous	[Y].GVSPTKLnDLcF.[T]	N8(Deamidated); C11(Carbamidomethyl)	1	1	QHD43416.1_S2_RBD	QHD43416.1_S2_RBD	2	2	0.5767	0	1	1	676.332	1351.66	1351.66	0.86	0.00058	HCD (High Energy Collision Dissociation)	MS2	0.245642	1.718	105.412	30617	200428_Lumos_(LC1200)_nanoFlex_Ieva_SARS_CoV2_i1_Chy_Chymo_90min_ETD_HCD_2ul.raw	F11		3.52	FALSE	0	0.02155	692759616	105.21
		TRUE	High	Sequest HT (A16)	Unambiguous	[Y].GVSPTKLnDLcF.[T]	N8(Deamidated); C11(Carbamidomethyl)	1	1	QHD43416.1_S2_RBD	QHD43416.1_S2_RBD	2	2	0.4935	0	1	1	676.332	1351.66	1351.66	0.77	0.00052	HCD (High Energy Collision Dissociation)	MS2	7.92732	17.937	107.457	31261	200428_Lumos_(LC1200)_nanoFlex_Ieva_SARS_CoV2_i1_Chy_Chymo_90min_ETD_HCD_2ul.raw	F11		3.08	FALSE	0	0.0592	4020052	107.41
	TRUE	High	[L].HAPATVCGPK.[K]	1xCarbamidomethyl [C7]		FALSE	0.00750486	0	1	1	6	QHD43416.1_S2_RBD	QHD43416.1_S2_RBD [346-355]	0	1037.52	3063035392		High	High	0	0.0165	2.99	25.6
		Checked	Confidence	Identifying Node	PSM Ambiguity	Annotated Sequence	Modifications	# Protein Groups	# Proteins	Master Protein Accessions	Protein Accessions	# Missed Cleavages	Charge	DeltaScore	DeltaCn	Rank	Search Engine Rank	m/z [Da]	MH+ [Da]	Theo. MH+ [Da]	DeltaM [ppm]	Deltam/z [Da]	Activation Type	MS Order	Isolation Interference [%]	Ion Inject Time [ms]	RT [min]	First Scan	Spectrum File	File ID	Quan Info	XCorr	Contaminant	Percolator q-Value	Percolator PEP	Precursor Abundance	Apex RT [min]
		TRUE	Low	Sequest HT (A14)	Ambiguous	[L].HAPATVcGPK.[K]	C7(Carbamidomethyl)	1	1	QHD43416.1_S2_RBD	QHD43416.1_S2_RBD	0	2	0.5468	0	1	1	519.264	1037.52	1037.52	0.38	0.0002	ETD (Electron Transfer Dissociation)	MS2	29.1316	29.317	25.3937	6261	200428_Lumos_(LC1200)_nanoFlex_Ieva_SARS_CoV2_i1_Chy_Chymo_90min_ETD_HCD_2ul.raw	F11		2.03	FALSE	0.2819	0.7473	3063035392	25.6
		TRUE	Low	Sequest HT (A14)	Ambiguous	[L].HAPATVcGPK.[K]	C7(Carbamidomethyl)	1	1	QHD43416.1_S2_RBD	QHD43416.1_S2_RBD	0	2	0.6633	0	1	1	519.264	1037.52	1037.52	0.73	0.00038	ETD (Electron Transfer Dissociation)	MS2	0.0882903	0.311	25.7373	6356	200428_Lumos_(LC1200)_nanoFlex_Ieva_SARS_CoV2_i1_Chy_Chymo_90min_ETD_HCD_2ul.raw	F11		1.96	FALSE	0.5786	0.9547	3063035392	25.6
		TRUE	Medium	Sequest HT (A14)	Ambiguous	[L].HAPATVcGPK.[K]	C7(Carbamidomethyl)	1	1	QHD43416.1_S2_RBD	QHD43416.1_S2_RBD	0	2	0.6471	0	1	1	519.263	1037.52	1037.52	0.02	1e-05	ETD (Electron Transfer Dissociation)	MS2	5.96583	14.951	26.1286	6456	200428_Lumos_(LC1200)_nanoFlex_Ieva_SARS_CoV2_i1_Chy_Chymo_90min_ETD_HCD_2ul.raw	F11		1.87	FALSE	0.04449	0.4457	3063035392	25.6
		TRUE	High	Sequest HT (A18)	Ambiguous	[L].HAPATVcGPK.[K]	C7(Carbamidomethyl)	1	1	QHD43416.1_S2_RBD	QHD43416.1_S2_RBD	0	2	0.5452	0	1	1	519.264	1037.52	1037.52	0.38	0.0002	HCD (High Energy Collision Dissociation)	MS2	29.1316	6.132	25.4055	6263	200428_Lumos_(LC1200)_nanoFlex_Ieva_SARS_CoV2_i1_Chy_Chymo_90min_ETD_HCD_2ul.raw	F11		2.99	FALSE	0	0.0165	3063035392	25.6
		TRUE	High	Sequest HT (A18)	Ambiguous	[L].HAPATVcGPK.[K]	C7(Carbamidomethyl)	1	1	QHD43416.1_S2_RBD	QHD43416.1_S2_RBD	0	2	0.5392	0	1	1	519.264	1037.52	1037.52	0.73	0.00038	HCD (High Energy Collision Dissociation)	MS2	0.0882903	0.195	25.7453	6357	200428_Lumos_(LC1200)_nanoFlex_Ieva_SARS_CoV2_i1_Chy_Chymo_90min_ETD_HCD_2ul.raw	F11		2.93	FALSE	0	0.01409	3063035392	25.6
		TRUE	High	Sequest HT (A18)	Ambiguous	[L].HAPATVcGPK.[K]	C7(Carbamidomethyl)	1	1	QHD43416.1_S2_RBD	QHD43416.1_S2_RBD	0	2	0.4981	0	1	1	519.263	1037.52	1037.52	0.02	1e-05	HCD (High Energy Collision Dissociation)	MS2	5.96583	17.184	26.1376	6458	200428_Lumos_(LC1200)_nanoFlex_Ieva_SARS_CoV2_i1_Chy_Chymo_90min_ETD_HCD_2ul.raw	F11		2.63	FALSE	0	0.02763	3063035392	25.6
	TRUE	High	[L].HAPATVCGPKK.[S]	1xCarbamidomethyl [C7]		FALSE	0.00988316	0	1	1	8	QHD43416.1_S2_RBD	QHD43416.1_S2_RBD [346-356]	0	1165.61	9.67558e+07		High	High	0	0.04959	3.86	19.66
		Checked	Confidence	Identifying Node	PSM Ambiguity	Annotated Sequence	Modifications	# Protein Groups	# Proteins	Master Protein Accessions	Protein Accessions	# Missed Cleavages	Charge	DeltaScore	DeltaCn	Rank	Search Engine Rank	m/z [Da]	MH+ [Da]	Theo. MH+ [Da]	DeltaM [ppm]	Deltam/z [Da]	Activation Type	MS Order	Isolation Interference [%]	Ion Inject Time [ms]	RT [min]	First Scan	Spectrum File	File ID	Quan Info	XCorr	Contaminant	Percolator q-Value	Percolator PEP	Precursor Abundance	Apex RT [min]
		TRUE	High	Sequest HT (A14)	Ambiguous	[L].HAPATVcGPKK.[S]	C7(Carbamidomethyl)	1	1	QHD43416.1_S2_RBD	QHD43416.1_S2_RBD	0	3	0.5207	0	1	1	389.21	1165.61	1165.61	-0.43	-0.00017	ETD (Electron Transfer Dissociation)	MS2	55.2455	86	19.1242	4561	200428_Lumos_(LC1200)_nanoFlex_Ieva_SARS_CoV2_i1_Chy_Chymo_90min_ETD_HCD_2ul.raw	F11		2.42	FALSE	0.004942	0.2583	166227	19.12
		TRUE	High	Sequest HT (A14)	Ambiguous	[L].HAPATVcGPKK.[S]	C7(Carbamidomethyl)	1	1	QHD43416.1_S2_RBD	QHD43416.1_S2_RBD	0	3	0.6696	0	1	1	389.21	1165.61	1165.61	0.04	2e-05	ETD (Electron Transfer Dissociation)	MS2	3.6933	26.455	19.5055	4673	200428_Lumos_(LC1200)_nanoFlex_Ieva_SARS_CoV2_i1_Chy_Chymo_90min_ETD_HCD_2ul.raw	F11		3.39	FALSE	0	0.04794	95368112	19.66
		TRUE	High	Sequest HT (A14)	Ambiguous	[L].HAPATVcGPKK.[S]	C7(Carbamidomethyl)	1	1	QHD43416.1_S2_RBD	QHD43416.1_S2_RBD	0	2	0.5694	0	1	1	583.311	1165.61	1165.61	0.24	0.00014	ETD (Electron Transfer Dissociation)	MS2	36.795	86	19.5983	4698	200428_Lumos_(LC1200)_nanoFlex_Ieva_SARS_CoV2_i1_Chy_Chymo_90min_ETD_HCD_2ul.raw	F11		2.09	FALSE	0	0.1532	1.22144e+06	19.66
		TRUE	Low	Sequest HT (A14)	Ambiguous	[L].HAPATVcGPKK.[S]	C7(Carbamidomethyl)	1	1	QHD43416.1_S2_RBD	QHD43416.1_S2_RBD	0	3	0.5325	0	1	1	389.21	1165.61	1165.61	0.04	2e-05	ETD (Electron Transfer Dissociation)	MS2	28.6424	86	19.9188	4784	200428_Lumos_(LC1200)_nanoFlex_Ieva_SARS_CoV2_i1_Chy_Chymo_90min_ETD_HCD_2ul.raw	F11		2.46	FALSE	0.08639	0.5314	95368112	19.66
		TRUE	Low	Sequest HT (A18)	Ambiguous	[L].HAPATVcGPKK.[S]	C7(Carbamidomethyl)	1	1	QHD43416.1_S2_RBD	QHD43416.1_S2_RBD	0	3	0.4977	0	1	1	389.21	1165.61	1165.61	-0.43	-0.00017	HCD (High Energy Collision Dissociation)	MS2	55.2455	54	19.1319	4563	200428_Lumos_(LC1200)_nanoFlex_Ieva_SARS_CoV2_i1_Chy_Chymo_90min_ETD_HCD_2ul.raw	F11		2.17	FALSE	0.2219	0.7787	95368112	19.66
		TRUE	High	Sequest HT (A18)	Ambiguous	[L].HAPATVcGPKK.[S]	C7(Carbamidomethyl)	1	1	QHD43416.1_S2_RBD	QHD43416.1_S2_RBD	0	3	0.5959	0	1	1	389.21	1165.61	1165.61	0.04	2e-05	HCD (High Energy Collision Dissociation)	MS2	3.6933	8.41	19.5164	4675	200428_Lumos_(LC1200)_nanoFlex_Ieva_SARS_CoV2_i1_Chy_Chymo_90min_ETD_HCD_2ul.raw	F11		3.86	FALSE	0	0.04959	95368112	19.66
		TRUE	High	Sequest HT (A18)	Ambiguous	[L].HAPATVcGPKK.[S]	C7(Carbamidomethyl)	1	1	QHD43416.1_S2_RBD	QHD43416.1_S2_RBD	0	2	0.5651	0	1	1	583.311	1165.61	1165.61	0.24	0.00014	HCD (High Energy Collision Dissociation)	MS2	36.795	54	19.6076	4700	200428_Lumos_(LC1200)_nanoFlex_Ieva_SARS_CoV2_i1_Chy_Chymo_90min_ETD_HCD_2ul.raw	F11		2.69	FALSE	0	0.01791	1.22144e+06	19.66
		TRUE	High	Sequest HT (A18)	Ambiguous	[L].HAPATVcGPKK.[S]	C7(Carbamidomethyl)	1	1	QHD43416.1_S2_RBD	QHD43416.1_S2_RBD	0	3	0.4328	0	1	1	389.21	1165.61	1165.61	0.04	2e-05	HCD (High Energy Collision Dissociation)	MS2	28.6424	54	19.929	4786	200428_Lumos_(LC1200)_nanoFlex_Ieva_SARS_CoV2_i1_Chy_Chymo_90min_ETD_HCD_2ul.raw	F11		2.68	FALSE	0.004512	0.1417	95368112	19.66
	TRUE	High	[L].HAPATVCGPKKS.[T]	1xCarbamidomethyl [C7]		FALSE	0.00702362	0	1	1	8	QHD43416.1_S2_RBD	QHD43416.1_S2_RBD [346-357]	0	1252.65	4.68485e+07		High	High	0	0.05808	3.85	19.83
		Checked	Confidence	Identifying Node	PSM Ambiguity	Annotated Sequence	Modifications	# Protein Groups	# Proteins	Master Protein Accessions	Protein Accessions	# Missed Cleavages	Charge	DeltaScore	DeltaCn	Rank	Search Engine Rank	m/z [Da]	MH+ [Da]	Theo. MH+ [Da]	DeltaM [ppm]	Deltam/z [Da]	Activation Type	MS Order	Isolation Interference [%]	Ion Inject Time [ms]	RT [min]	First Scan	Spectrum File	File ID	Quan Info	XCorr	Contaminant	Percolator q-Value	Percolator PEP	Precursor Abundance	Apex RT [min]
		TRUE	Low	Sequest HT (A14)	Ambiguous	[L].HAPATVcGPKKS.[T]	C7(Carbamidomethyl)	1	1	QHD43416.1_S2_RBD	QHD43416.1_S2_RBD	0	3	0.6042	0	1	1	418.22	1252.65	1252.65	-0.17	-7e-05	ETD (Electron Transfer Dissociation)	MS2	50.9997	86	19.3488	4626	200428_Lumos_(LC1200)_nanoFlex_Ieva_SARS_CoV2_i1_Chy_Chymo_90min_ETD_HCD_2ul.raw	F11		2.83	FALSE	0.1654	0.6553	46119064	19.83
		TRUE	High	Sequest HT (A14)	Ambiguous	[L].HAPATVcGPKKS.[T]	C7(Carbamidomethyl)	1	1	QHD43416.1_S2_RBD	QHD43416.1_S2_RBD	0	3	0.6316	0	1	1	418.22	1252.65	1252.65	-0.02	-1e-05	ETD (Electron Transfer Dissociation)	MS2	3.37826	21.669	19.7043	4727	200428_Lumos_(LC1200)_nanoFlex_Ieva_SARS_CoV2_i1_Chy_Chymo_90min_ETD_HCD_2ul.raw	F11		3.8	FALSE	0	0.08755	46119064	19.83
		TRUE	High	Sequest HT (A14)	Ambiguous	[L].HAPATVcGPKKS.[T]	C7(Carbamidomethyl)	1	1	QHD43416.1_S2_RBD	QHD43416.1_S2_RBD	0	2	0.5288	0	1	1	626.827	1252.65	1252.65	-0.21	-0.00013	ETD (Electron Transfer Dissociation)	MS2	16.3058	86	19.8466	4765	200428_Lumos_(LC1200)_nanoFlex_Ieva_SARS_CoV2_i1_Chy_Chymo_90min_ETD_HCD_2ul.raw	F11		2.08	FALSE	0.001329	0.1846	729424	19.81
		TRUE	High	Sequest HT (A14)	Ambiguous	[L].HAPATVcGPKKS.[T]	C7(Carbamidomethyl)	1	1	QHD43416.1_S2_RBD	QHD43416.1_S2_RBD	0	3	0.6278	0	1	1	418.22	1252.65	1252.65	0.05	2e-05	ETD (Electron Transfer Dissociation)	MS2	6.0758	82.672	20.0696	4824	200428_Lumos_(LC1200)_nanoFlex_Ieva_SARS_CoV2_i1_Chy_Chymo_90min_ETD_HCD_2ul.raw	F11		3.6	FALSE	0	0.1067	46119064	19.83
		TRUE	High	Sequest HT (A18)	Ambiguous	[L].HAPATVcGPKKS.[T]	C7(Carbamidomethyl)	1	1	QHD43416.1_S2_RBD	QHD43416.1_S2_RBD	0	3	0.5762	0	1	1	418.22	1252.65	1252.65	-0.17	-7e-05	HCD (High Energy Collision Dissociation)	MS2	50.9997	54	19.3585	4628	200428_Lumos_(LC1200)_nanoFlex_Ieva_SARS_CoV2_i1_Chy_Chymo_90min_ETD_HCD_2ul.raw	F11		2.69	FALSE	0.007192	0.3058	46119064	19.83
		TRUE	High	Sequest HT (A18)	Ambiguous	[L].HAPATVcGPKKS.[T]	C7(Carbamidomethyl)	1	1	QHD43416.1_S2_RBD	QHD43416.1_S2_RBD	0	3	0.5922	0	1	1	418.22	1252.65	1252.65	-0.02	-1e-05	HCD (High Energy Collision Dissociation)	MS2	3.37826	11.538	19.7148	4729	200428_Lumos_(LC1200)_nanoFlex_Ieva_SARS_CoV2_i1_Chy_Chymo_90min_ETD_HCD_2ul.raw	F11		3.85	FALSE	0	0.05808	46119064	19.83
		TRUE	High	Sequest HT (A18)	Ambiguous	[L].HAPATVcGPKKS.[T]	C7(Carbamidomethyl)	1	1	QHD43416.1_S2_RBD	QHD43416.1_S2_RBD	0	2	0.6513	0	1	1	626.827	1252.65	1252.65	-0.21	-0.00013	HCD (High Energy Collision Dissociation)	MS2	16.3058	54	19.8562	4767	200428_Lumos_(LC1200)_nanoFlex_Ieva_SARS_CoV2_i1_Chy_Chymo_90min_ETD_HCD_2ul.raw	F11		2.38	FALSE	0	0.01325	729424	19.81
		TRUE	High	Sequest HT (A18)	Ambiguous	[L].HAPATVcGPKKS.[T]	C7(Carbamidomethyl)	1	1	QHD43416.1_S2_RBD	QHD43416.1_S2_RBD	0	3	0.6192	0	1	1	418.22	1252.65	1252.65	0.05	2e-05	HCD (High Energy Collision Dissociation)	MS2	6.0758	54	20.0802	4826	200428_Lumos_(LC1200)_nanoFlex_Ieva_SARS_CoV2_i1_Chy_Chymo_90min_ETD_HCD_2ul.raw	F11		3.23	FALSE	0	0.02603	46119064	19.83
	TRUE	High	[L].HAPATVCGPKKST.[N]	1xCarbamidomethyl [C7]		FALSE	0.00023823	0	1	1	14	QHD43416.1_S2_RBD	QHD43416.1_S2_RBD [346-358]	0	1353.69	173757427		High	High	0	0.001307	5.08	21
		Checked	Confidence	Identifying Node	PSM Ambiguity	Annotated Sequence	Modifications	# Protein Groups	# Proteins	Master Protein Accessions	Protein Accessions	# Missed Cleavages	Charge	DeltaScore	DeltaCn	Rank	Search Engine Rank	m/z [Da]	MH+ [Da]	Theo. MH+ [Da]	DeltaM [ppm]	Deltam/z [Da]	Activation Type	MS Order	Isolation Interference [%]	Ion Inject Time [ms]	RT [min]	First Scan	Spectrum File	File ID	Quan Info	XCorr	Contaminant	Percolator q-Value	Percolator PEP	Precursor Abundance	Apex RT [min]
		TRUE	High	Sequest HT (A14)	Ambiguous	[L].HAPATVcGPKKST.[N]	C7(Carbamidomethyl)	1	1	QHD43416.1_S2_RBD	QHD43416.1_S2_RBD	0	3	0.5265	0	1	1	451.903	1353.69	1353.69	0.04	2e-05	ETD (Electron Transfer Dissociation)	MS2	32.3802	86	20.4029	4921	200428_Lumos_(LC1200)_nanoFlex_Ieva_SARS_CoV2_i1_Chy_Chymo_90min_ETD_HCD_2ul.raw	F11		3.02	FALSE	0	0.05429	169460368	21
		TRUE	High	Sequest HT (A14)	Ambiguous	[L].HAPATVcGPKKST.[N]	C7(Carbamidomethyl)	1	1	QHD43416.1_S2_RBD	QHD43416.1_S2_RBD	0	3	0.6667	0	1	1	451.903	1353.7	1353.69	0.78	0.00035	ETD (Electron Transfer Dissociation)	MS2	0	21.419	20.7375	5012	200428_Lumos_(LC1200)_nanoFlex_Ieva_SARS_CoV2_i1_Chy_Chymo_90min_ETD_HCD_2ul.raw	F11		3.96	FALSE	0	0.04753	169460368	21
		TRUE	High	Sequest HT (A14)	Ambiguous	[L].HAPATVcGPKKST.[N]	C7(Carbamidomethyl)	1	1	QHD43416.1_S2_RBD	QHD43416.1_S2_RBD	0	2	0.5209	0	1	1	677.351	1353.69	1353.69	0.21	0.00014	ETD (Electron Transfer Dissociation)	MS2	0	86	20.8734	5045	200428_Lumos_(LC1200)_nanoFlex_Ieva_SARS_CoV2_i1_Chy_Chymo_90min_ETD_HCD_2ul.raw	F11		2.15	FALSE	0	0.02326	4297059	20.95
		TRUE	High	Sequest HT (A14)	Ambiguous	[L].HAPATVcGPKKST.[N]	C7(Carbamidomethyl)	1	1	QHD43416.1_S2_RBD	QHD43416.1_S2_RBD	0	3	0.6434	0	1	1	451.903	1353.69	1353.69	0.31	0.00014	ETD (Electron Transfer Dissociation)	MS2	0.5698	3.316	21.0822	5099	200428_Lumos_(LC1200)_nanoFlex_Ieva_SARS_CoV2_i1_Chy_Chymo_90min_ETD_HCD_2ul.raw	F11		3.87	FALSE	0	0.1535	169460368	21
		TRUE	High	Sequest HT (A14)	Ambiguous	[L].HAPATVcGPKKST.[N]	C7(Carbamidomethyl)	1	1	QHD43416.1_S2_RBD	QHD43416.1_S2_RBD	0	2	0.4511	0	1	1	677.351	1353.69	1353.69	0.21	0.00014	ETD (Electron Transfer Dissociation)	MS2	24.9683	86	21.2308	5142	200428_Lumos_(LC1200)_nanoFlex_Ieva_SARS_CoV2_i1_Chy_Chymo_90min_ETD_HCD_2ul.raw	F11		1.84	FALSE	0	0.1098	4297059	20.95
		TRUE	High	Sequest HT (A14)	Ambiguous	[L].HAPATVcGPKKST.[N]	C7(Carbamidomethyl)	1	1	QHD43416.1_S2_RBD	QHD43416.1_S2_RBD	0	3	0.6022	0	1	1	451.903	1353.69	1353.69	0.11	5e-05	ETD (Electron Transfer Dissociation)	MS2	2.88136	86	21.4397	5202	200428_Lumos_(LC1200)_nanoFlex_Ieva_SARS_CoV2_i1_Chy_Chymo_90min_ETD_HCD_2ul.raw	F11		3.57	FALSE	0	0.1435	169460368	21
		TRUE	Low	Sequest HT (A14)	Ambiguous	[L].HAPATVcGPKKST.[N]	C7(Carbamidomethyl)	1	1	QHD43416.1_S2_RBD	QHD43416.1_S2_RBD	0	3	0.1382	0	1	1	451.903	1353.69	1353.69	-0.5	-0.00023	ETD (Electron Transfer Dissociation)	MS2	70.4753	86	22.4298	5463	200428_Lumos_(LC1200)_nanoFlex_Ieva_SARS_CoV2_i1_Chy_Chymo_90min_ETD_HCD_2ul.raw	F11		1.23	FALSE	0.644	0.9867	169460368	21
		TRUE	High	Sequest HT (A18)	Ambiguous	[L].HAPATVcGPKKST.[N]	C7(Carbamidomethyl)	1	1	QHD43416.1_S2_RBD	QHD43416.1_S2_RBD	0	3	0.6023	0	1	1	451.903	1353.69	1353.69	0.04	2e-05	HCD (High Energy Collision Dissociation)	MS2	32.3802	54	20.4138	4923	200428_Lumos_(LC1200)_nanoFlex_Ieva_SARS_CoV2_i1_Chy_Chymo_90min_ETD_HCD_2ul.raw	F11		3.47	FALSE	0	0.07849	169460368	21
		TRUE	High	Sequest HT (A18)	Ambiguous	[L].HAPATVcGPKKST.[N]	C7(Carbamidomethyl)	1	1	QHD43416.1_S2_RBD	QHD43416.1_S2_RBD	0	3	0.6457	0	1	1	451.903	1353.7	1353.69	0.78	0.00035	HCD (High Energy Collision Dissociation)	MS2	0	12.716	20.754	5014	200428_Lumos_(LC1200)_nanoFlex_Ieva_SARS_CoV2_i1_Chy_Chymo_90min_ETD_HCD_2ul.raw	F11		5.08	FALSE	0	0.001307	169460368	21
		TRUE	High	Sequest HT (A18)	Ambiguous	[L].HAPATVcGPKKST.[N]	C7(Carbamidomethyl)	1	1	QHD43416.1_S2_RBD	QHD43416.1_S2_RBD	0	2	0.7104	0	1	1	677.351	1353.69	1353.69	0.21	0.00014	HCD (High Energy Collision Dissociation)	MS2	0	54	20.8886	5048	200428_Lumos_(LC1200)_nanoFlex_Ieva_SARS_CoV2_i1_Chy_Chymo_90min_ETD_HCD_2ul.raw	F11		3.66	FALSE	0	0.0008221	4297059	20.95
		TRUE	High	Sequest HT (A18)	Ambiguous	[L].HAPATVcGPKKST.[N]	C7(Carbamidomethyl)	1	1	QHD43416.1_S2_RBD	QHD43416.1_S2_RBD	0	3	0.6525	0	1	1	451.903	1353.69	1353.69	0.31	0.00014	HCD (High Energy Collision Dissociation)	MS2	0.5698	1.838	21.0948	5101	200428_Lumos_(LC1200)_nanoFlex_Ieva_SARS_CoV2_i1_Chy_Chymo_90min_ETD_HCD_2ul.raw	F11		4.72	FALSE	0	0.000644	169460368	21
		TRUE	High	Sequest HT (A18)	Ambiguous	[L].HAPATVcGPKKST.[N]	C7(Carbamidomethyl)	1	1	QHD43416.1_S2_RBD	QHD43416.1_S2_RBD	0	2	0.5256	0	1	1	677.351	1353.69	1353.69	0.21	0.00014	HCD (High Energy Collision Dissociation)	MS2	24.9683	54	21.2411	5144	200428_Lumos_(LC1200)_nanoFlex_Ieva_SARS_CoV2_i1_Chy_Chymo_90min_ETD_HCD_2ul.raw	F11		2.15	FALSE	0	0.01896	4297059	20.95
		TRUE	High	Sequest HT (A18)	Ambiguous	[L].HAPATVcGPKKST.[N]	C7(Carbamidomethyl)	1	1	QHD43416.1_S2_RBD	QHD43416.1_S2_RBD	0	3	0.5414	0	1	1	451.903	1353.69	1353.69	0.11	5e-05	HCD (High Energy Collision Dissociation)	MS2	2.88136	54	21.4515	5204	200428_Lumos_(LC1200)_nanoFlex_Ieva_SARS_CoV2_i1_Chy_Chymo_90min_ETD_HCD_2ul.raw	F11		3.14	FALSE	0.004512	0.1947	169460368	21
		TRUE	Low	Sequest HT (A18)	Ambiguous	[L].HAPATVcGPKKST.[N]	C7(Carbamidomethyl)	1	1	QHD43416.1_S2_RBD	QHD43416.1_S2_RBD	0	3	0.0331	0	1	1	451.903	1353.69	1353.69	-0.5	-0.00023	HCD (High Energy Collision Dissociation)	MS2	70.4753	54	22.4378	5465	200428_Lumos_(LC1200)_nanoFlex_Ieva_SARS_CoV2_i1_Chy_Chymo_90min_ETD_HCD_2ul.raw	F11		1.21	FALSE	0.9324	1	169460368	21
	TRUE	High	[L].HAPATVCGPKKSTN.[L]	1xCarbamidomethyl [C7]		FALSE	0.000176931	0	1	1	28	QHD43416.1_S2_RBD	QHD43416.1_S2_RBD [346-359]	0	1467.74	1.3801e+09		High	High	0	0.00448	5.46	20.71
		Checked	Confidence	Identifying Node	PSM Ambiguity	Annotated Sequence	Modifications	# Protein Groups	# Proteins	Master Protein Accessions	Protein Accessions	# Missed Cleavages	Charge	DeltaScore	DeltaCn	Rank	Search Engine Rank	m/z [Da]	MH+ [Da]	Theo. MH+ [Da]	DeltaM [ppm]	Deltam/z [Da]	Activation Type	MS Order	Isolation Interference [%]	Ion Inject Time [ms]	RT [min]	First Scan	Spectrum File	File ID	Quan Info	XCorr	Contaminant	Percolator q-Value	Percolator PEP	Precursor Abundance	Apex RT [min]
		TRUE	High	Sequest HT (A14)	Ambiguous	[L].HAPATVcGPKKSTN.[L]	C7(Carbamidomethyl)	1	1	QHD43416.1_S2_RBD	QHD43416.1_S2_RBD	0	3	0.6682	0	1	1	489.917	1467.74	1467.74	-0.02	-1e-05	ETD (Electron Transfer Dissociation)	MS2	41.4973	86	20.1087	4836	200428_Lumos_(LC1200)_nanoFlex_Ieva_SARS_CoV2_i1_Chy_Chymo_90min_ETD_HCD_2ul.raw	F11		4.28	FALSE	0	0.05221	1329512960	20.71
		TRUE	High	Sequest HT (A14)	Ambiguous	[L].HAPATVcGPKKSTN.[L]	C7(Carbamidomethyl)	1	1	QHD43416.1_S2_RBD	QHD43416.1_S2_RBD	0	3	0.6507	0	1	1	489.917	1467.74	1467.74	0.11	5e-05	ETD (Electron Transfer Dissociation)	MS2	15.2643	53.492	20.4738	4943	200428_Lumos_(LC1200)_nanoFlex_Ieva_SARS_CoV2_i1_Chy_Chymo_90min_ETD_HCD_2ul.raw	F11		4.38	FALSE	0	0.06575	1329512960	20.71
		TRUE	High	Sequest HT (A14)	Ambiguous	[L].HAPATVcGPKKSTN.[L]	C7(Carbamidomethyl)	1	1	QHD43416.1_S2_RBD	QHD43416.1_S2_RBD	0	2	0.6232	0	1	1	734.372	1467.74	1467.74	-0.03	-2e-05	ETD (Electron Transfer Dissociation)	MS2	0	86	20.5919	4976	200428_Lumos_(LC1200)_nanoFlex_Ieva_SARS_CoV2_i1_Chy_Chymo_90min_ETD_HCD_2ul.raw	F11		2.76	FALSE	0	0.03246	43225280	20.74
		TRUE	Low	Sequest HT (A14)	Ambiguous	[L].HAPATVcGPKKSTN.[L]	C7(Carbamidomethyl)	1	1	QHD43416.1_S2_RBD	QHD43416.1_S2_RBD	0	4	0.3633	0	1	1	367.69	1467.74	1467.74	-0.55	-0.0002	ETD (Electron Transfer Dissociation)	MS2	19.1711	86	20.6229	4984	200428_Lumos_(LC1200)_nanoFlex_Ieva_SARS_CoV2_i1_Chy_Chymo_90min_ETD_HCD_2ul.raw	F11		2.78	FALSE	0.3574	0.8074
		TRUE	High	Sequest HT (A14)	Ambiguous	[L].HAPATVcGPKKSTN.[L]	C7(Carbamidomethyl)	1	1	QHD43416.1_S2_RBD	QHD43416.1_S2_RBD	0	3	0.6778	0	1	1	489.918	1467.74	1467.74	1.42	0.00069	ETD (Electron Transfer Dissociation)	MS2	0.559623	0.668	20.8264	5033	200428_Lumos_(LC1200)_nanoFlex_Ieva_SARS_CoV2_i1_Chy_Chymo_90min_ETD_HCD_2ul.raw	F11		4.19	FALSE	0	0.05183	1329512960	20.71
		TRUE	High	Sequest HT (A14)	Ambiguous	[L].HAPATVcGPKKSTN.[L]	C7(Carbamidomethyl)	1	1	QHD43416.1_S2_RBD	QHD43416.1_S2_RBD	0	2	0.6542	0	1	1	734.372	1467.74	1467.74	0.22	0.00016	ETD (Electron Transfer Dissociation)	MS2	0	86	20.951	5065	200428_Lumos_(LC1200)_nanoFlex_Ieva_SARS_CoV2_i1_Chy_Chymo_90min_ETD_HCD_2ul.raw	F11		2.95	FALSE	0	0.03734	43225280	20.74
		TRUE	High	Sequest HT (A14)	Ambiguous	[L].HAPATVcGPKKSTN.[L]	C7(Carbamidomethyl)	1	1	QHD43416.1_S2_RBD	QHD43416.1_S2_RBD	0	3	0.701	0	1	1	489.917	1467.74	1467.74	0.29	0.00014	ETD (Electron Transfer Dissociation)	MS2	7.5567	40.05	21.1883	5130	200428_Lumos_(LC1200)_nanoFlex_Ieva_SARS_CoV2_i1_Chy_Chymo_90min_ETD_HCD_2ul.raw	F11		4.95	FALSE	0	0.006385	1329512960	20.71
		TRUE	High	Sequest HT (A14)	Ambiguous	[L].HAPATVcGPKKSTN.[L]	C7(Carbamidomethyl)	1	1	QHD43416.1_S2_RBD	QHD43416.1_S2_RBD	0	3	0.6275	0	1	1	489.917	1467.74	1467.74	-0.27	-0.00013	ETD (Electron Transfer Dissociation)	MS2	36.4356	86	21.5892	5240	200428_Lumos_(LC1200)_nanoFlex_Ieva_SARS_CoV2_i1_Chy_Chymo_90min_ETD_HCD_2ul.raw	F11		4.51	FALSE	0	0.01041	1329512960	20.71
		TRUE	Low	Sequest HT (A14)	Ambiguous	[L].HAPATVcGPKKSTN.[L]	C7(Carbamidomethyl)	1	1	QHD43416.1_S2_RBD	QHD43416.1_S2_RBD	0	3		0.0144	2	2	489.918	1467.74	1467.74	0.67	0.00033	ETD (Electron Transfer Dissociation)	MS2	10.4429	41.716	21.9694	5346	200428_Lumos_(LC1200)_nanoFlex_Ieva_SARS_CoV2_i1_Chy_Chymo_90min_ETD_HCD_2ul.raw	F11		1.37	FALSE	0.8866	1	2.92537e+06	21.98
		TRUE	High	Sequest HT (A14)	Ambiguous	[L].HAPATVcGPKKSTN.[L]	C7(Carbamidomethyl)	1	1	QHD43416.1_S2_RBD	QHD43416.1_S2_RBD	0	3	0.4772	0	1	1	489.917	1467.74	1467.74	0.29	0.00014	ETD (Electron Transfer Dissociation)	MS2	32.8342	46.789	22.6861	5537	200428_Lumos_(LC1200)_nanoFlex_Ieva_SARS_CoV2_i1_Chy_Chymo_90min_ETD_HCD_2ul.raw	F11		2.85	FALSE	0	0.1147	2479665	22.62
		TRUE	High	Sequest HT (A14)	Ambiguous	[L].HAPATVcGPKKSTN.[L]	C7(Carbamidomethyl)	1	1	QHD43416.1_S2_RBD	QHD43416.1_S2_RBD	0	3	0.5627	0	1	1	489.918	1467.74	1467.74	1.11	0.00054	ETD (Electron Transfer Dissociation)	MS2	44.3134	86	23.4581	5743	200428_Lumos_(LC1200)_nanoFlex_Ieva_SARS_CoV2_i1_Chy_Chymo_90min_ETD_HCD_2ul.raw	F11		3.75	FALSE	0	0.1669	1.95422e+06	23.57
		TRUE	High	Sequest HT (A14)	Ambiguous	[L].HAPATVcGPKKSTN.[L]	C7(Carbamidomethyl)	1	1	QHD43416.1_S2_RBD	QHD43416.1_S2_RBD	0	3	0.6813	0	1	1	489.918	1467.74	1467.74	1.42	0.00069	ETD (Electron Transfer Dissociation)	MS2	52.5959	37.739	34.4574	8780	200428_Lumos_(LC1200)_nanoFlex_Ieva_SARS_CoV2_i1_Chy_Chymo_90min_ETD_HCD_2ul.raw	F11		4.77	FALSE	0	0.01901	28607546	34.53
		TRUE	High	Sequest HT (A14)	Ambiguous	[L].HAPATVcGPKKSTN.[L]	C7(Carbamidomethyl)	1	1	QHD43416.1_S2_RBD	QHD43416.1_S2_RBD	0	3	0.6682	0	1	1	489.918	1467.74	1467.74	0.92	0.00045	ETD (Electron Transfer Dissociation)	MS2	48.4731	29.07	34.8629	8878	200428_Lumos_(LC1200)_nanoFlex_Ieva_SARS_CoV2_i1_Chy_Chymo_90min_ETD_HCD_2ul.raw	F11		4.46	FALSE	0	0.04504	28607546	34.53
		TRUE	High	Sequest HT (A14)	Ambiguous	[L].HAPATVcGPKKSTN.[L]	C7(Carbamidomethyl)	1	1	QHD43416.1_S2_RBD	QHD43416.1_S2_RBD	0	3	0.5908	0	1	1	489.918	1467.74	1467.74	1.04	0.00051	ETD (Electron Transfer Dissociation)	MS2	49.5881	55.141	35.7959	9129	200428_Lumos_(LC1200)_nanoFlex_Ieva_SARS_CoV2_i1_Chy_Chymo_90min_ETD_HCD_2ul.raw	F11		3.47	FALSE	0.002536	0.2081	28515054	34.81
		TRUE	High	Sequest HT (A18)	Ambiguous	[L].HAPATVcGPKKSTN.[L]	C7(Carbamidomethyl)	1	1	QHD43416.1_S2_RBD	QHD43416.1_S2_RBD	0	3	0.6453	0	1	1	489.917	1467.74	1467.74	-0.02	-1e-05	HCD (High Energy Collision Dissociation)	MS2	41.4973	50.368	20.1201	4838	200428_Lumos_(LC1200)_nanoFlex_Ieva_SARS_CoV2_i1_Chy_Chymo_90min_ETD_HCD_2ul.raw	F11		5.3	FALSE	0	0.007366	1329512960	20.71
		TRUE	High	Sequest HT (A18)	Ambiguous	[L].HAPATVcGPKKSTN.[L]	C7(Carbamidomethyl)	1	1	QHD43416.1_S2_RBD	QHD43416.1_S2_RBD	0	3	0.6218	0	1	1	489.917	1467.74	1467.74	0.11	5e-05	HCD (High Energy Collision Dissociation)	MS2	15.2643	21.268	20.4862	4945	200428_Lumos_(LC1200)_nanoFlex_Ieva_SARS_CoV2_i1_Chy_Chymo_90min_ETD_HCD_2ul.raw	F11		5.13	FALSE	0	0.000492	1329512960	20.71
		TRUE	High	Sequest HT (A18)	Ambiguous	[L].HAPATVcGPKKSTN.[L]	C7(Carbamidomethyl)	1	1	QHD43416.1_S2_RBD	QHD43416.1_S2_RBD	0	2	0.6829	0	1	1	734.372	1467.74	1467.74	-0.03	-2e-05	HCD (High Energy Collision Dissociation)	MS2	0	54	20.603	4978	200428_Lumos_(LC1200)_nanoFlex_Ieva_SARS_CoV2_i1_Chy_Chymo_90min_ETD_HCD_2ul.raw	F11		4.1	FALSE	0	0.00055	43225280	20.74
		TRUE	Low	Sequest HT (A18)	Ambiguous	[L].HAPATVcGPKKSTN.[L]	C7(Carbamidomethyl)	1	1	QHD43416.1_S2_RBD	QHD43416.1_S2_RBD	0	4	0.2871	0	1	1	367.69	1467.74	1467.74	-0.55	-0.0002	HCD (High Energy Collision Dissociation)	MS2	19.1711	54	20.6316	4985	200428_Lumos_(LC1200)_nanoFlex_Ieva_SARS_CoV2_i1_Chy_Chymo_90min_ETD_HCD_2ul.raw	F11		2.09	FALSE	0.9722	1
		TRUE	High	Sequest HT (A18)	Ambiguous	[L].HAPATVcGPKKSTN.[L]	C7(Carbamidomethyl)	1	1	QHD43416.1_S2_RBD	QHD43416.1_S2_RBD	0	3	0.5684	0	1	1	489.918	1467.74	1467.74	1.42	0.00069	HCD (High Energy Collision Dissociation)	MS2	0.559623	0.441	20.8377	5035	200428_Lumos_(LC1200)_nanoFlex_Ieva_SARS_CoV2_i1_Chy_Chymo_90min_ETD_HCD_2ul.raw	F11		4.68	FALSE	0	0.000886	1329512960	20.71
		TRUE	High	Sequest HT (A18)	Ambiguous	[L].HAPATVcGPKKSTN.[L]	C7(Carbamidomethyl)	1	1	QHD43416.1_S2_RBD	QHD43416.1_S2_RBD	0	2	0.6021	0	1	1	734.372	1467.74	1467.74	0.22	0.00016	HCD (High Energy Collision Dissociation)	MS2	0	54	20.961	5067	200428_Lumos_(LC1200)_nanoFlex_Ieva_SARS_CoV2_i1_Chy_Chymo_90min_ETD_HCD_2ul.raw	F11		3.87	FALSE	0	0.000599	43225280	20.74
		TRUE	High	Sequest HT (A18)	Ambiguous	[L].HAPATVcGPKKSTN.[L]	C7(Carbamidomethyl)	1	1	QHD43416.1_S2_RBD	QHD43416.1_S2_RBD	0	3	0.6172	0	1	1	489.917	1467.74	1467.74	0.29	0.00014	HCD (High Energy Collision Dissociation)	MS2	7.5567	41.141	21.1975	5131	200428_Lumos_(LC1200)_nanoFlex_Ieva_SARS_CoV2_i1_Chy_Chymo_90min_ETD_HCD_2ul.raw	F11		5.12	FALSE	0	0.0006096	1329512960	20.71
		TRUE	High	Sequest HT (A18)	Ambiguous	[L].HAPATVcGPKKSTN.[L]	C7(Carbamidomethyl)	1	1	QHD43416.1_S2_RBD	QHD43416.1_S2_RBD	0	3	0.6265	0	1	1	489.917	1467.74	1467.74	-0.27	-0.00013	HCD (High Energy Collision Dissociation)	MS2	36.4356	54	21.5988	5242	200428_Lumos_(LC1200)_nanoFlex_Ieva_SARS_CoV2_i1_Chy_Chymo_90min_ETD_HCD_2ul.raw	F11		3.24	FALSE	0	0.05182	1329512960	20.71
		TRUE	Low	Sequest HT (A18)	Ambiguous	[L].HAPATVcGPKKSTN.[L]	C7(Carbamidomethyl)	1	1	QHD43416.1_S2_RBD	QHD43416.1_S2_RBD	0	3	0.2062	0	1	1	489.918	1467.74	1467.74	0.67	0.00033	HCD (High Energy Collision Dissociation)	MS2	10.4429	28.784	21.9817	5348	200428_Lumos_(LC1200)_nanoFlex_Ieva_SARS_CoV2_i1_Chy_Chymo_90min_ETD_HCD_2ul.raw	F11		1.94	FALSE	0.6895	1	2.92537e+06	21.98
		TRUE	High	Sequest HT (A18)	Ambiguous	[L].HAPATVcGPKKSTN.[L]	C7(Carbamidomethyl)	1	1	QHD43416.1_S2_RBD	QHD43416.1_S2_RBD	0	3	0.5433	0	1	1	489.917	1467.74	1467.74	0.29	0.00014	HCD (High Energy Collision Dissociation)	MS2	32.8342	40.188	22.6974	5539	200428_Lumos_(LC1200)_nanoFlex_Ieva_SARS_CoV2_i1_Chy_Chymo_90min_ETD_HCD_2ul.raw	F11		3.81	FALSE	0.004512	0.222	2479665	22.62
		TRUE	High	Sequest HT (A18)	Ambiguous	[L].HAPATVcGPKKSTN.[L]	C7(Carbamidomethyl)	1	1	QHD43416.1_S2_RBD	QHD43416.1_S2_RBD	0	3	0.4899	0	1	1	489.918	1467.74	1467.74	1.11	0.00054	HCD (High Energy Collision Dissociation)	MS2	44.3134	54	23.4698	5745	200428_Lumos_(LC1200)_nanoFlex_Ieva_SARS_CoV2_i1_Chy_Chymo_90min_ETD_HCD_2ul.raw	F11		3.45	FALSE	0.004512	0.2231	1.95422e+06	23.57
		TRUE	High	Sequest HT (A18)	Ambiguous	[L].HAPATVcGPKKSTN.[L]	C7(Carbamidomethyl)	1	1	QHD43416.1_S2_RBD	QHD43416.1_S2_RBD	0	3	0.619	0	1	1	489.918	1467.74	1467.74	1.42	0.00069	HCD (High Energy Collision Dissociation)	MS2	52.5959	22.917	34.4667	8782	200428_Lumos_(LC1200)_nanoFlex_Ieva_SARS_CoV2_i1_Chy_Chymo_90min_ETD_HCD_2ul.raw	F11		5.46	FALSE	0	0.00448	28607546	34.53
		TRUE	High	Sequest HT (A18)	Ambiguous	[L].HAPATVcGPKKSTN.[L]	C7(Carbamidomethyl)	1	1	QHD43416.1_S2_RBD	QHD43416.1_S2_RBD	0	3	0.6186	0	1	1	489.918	1467.74	1467.74	0.92	0.00045	HCD (High Energy Collision Dissociation)	MS2	48.4731	34.45	34.8716	8880	200428_Lumos_(LC1200)_nanoFlex_Ieva_SARS_CoV2_i1_Chy_Chymo_90min_ETD_HCD_2ul.raw	F11		5.06	FALSE	0	0.00164	28607546	34.53
		TRUE	High	Sequest HT (A18)	Ambiguous	[L].HAPATVcGPKKSTN.[L]	C7(Carbamidomethyl)	1	1	QHD43416.1_S2_RBD	QHD43416.1_S2_RBD	0	3	0.5918	0	1	1	489.918	1467.74	1467.74	1.04	0.00051	HCD (High Energy Collision Dissociation)	MS2	49.5881	29.769	35.8065	9130	200428_Lumos_(LC1200)_nanoFlex_Ieva_SARS_CoV2_i1_Chy_Chymo_90min_ETD_HCD_2ul.raw	F11		4.41	FALSE	0	0.04856	28515054	34.81
	TRUE	High	[L].HAPATVCGPKKSTN.[L]	1xCarbamidomethyl [C7]; 1xDeamidated [N14]		FALSE	0.00118128	0	1	1	4	QHD43416.1_S2_RBD	QHD43416.1_S2_RBD [346-359]	0	1468.72	6.13819e+06		High	High	0	0.002703	5.07	24.55
		Checked	Confidence	Identifying Node	PSM Ambiguity	Annotated Sequence	Modifications	# Protein Groups	# Proteins	Master Protein Accessions	Protein Accessions	# Missed Cleavages	Charge	DeltaScore	DeltaCn	Rank	Search Engine Rank	m/z [Da]	MH+ [Da]	Theo. MH+ [Da]	DeltaM [ppm]	Deltam/z [Da]	Activation Type	MS Order	Isolation Interference [%]	Ion Inject Time [ms]	RT [min]	First Scan	Spectrum File	File ID	Quan Info	XCorr	Contaminant	Percolator q-Value	Percolator PEP	Precursor Abundance	Apex RT [min]
		TRUE	High	Sequest HT (A14)	Ambiguous	[L].HAPATVcGPKKSTn.[L]	C7(Carbamidomethyl); N14(Deamidated)	1	1	QHD43416.1_S2_RBD	QHD43416.1_S2_RBD	0	3	0.4415	0	1	1	490.245	1468.72	1468.72	0.23	0.00011	ETD (Electron Transfer Dissociation)	MS2	55.3396	86	22.3907	5453	200428_Lumos_(LC1200)_nanoFlex_Ieva_SARS_CoV2_i1_Chy_Chymo_90min_ETD_HCD_2ul.raw	F11		4.53	FALSE	0	0.05065	1128780	22.51
		TRUE	Low	Sequest HT (A14)	Ambiguous	[L].HAPATVcGPKKSTn.[L]	C7(Carbamidomethyl); N14(Deamidated)	1	1	QHD43416.1_S2_RBD	QHD43416.1_S2_RBD	0	3	0.2639	0	1	1	490.246	1468.72	1468.72	0.48	0.00023	ETD (Electron Transfer Dissociation)	MS2	16.0726	80.955	24.4535	6009	200428_Lumos_(LC1200)_nanoFlex_Ieva_SARS_CoV2_i1_Chy_Chymo_90min_ETD_HCD_2ul.raw	F11		2.16	FALSE	0.09668	0.5588	5.00941e+06	24.55
		TRUE	High	Sequest HT (A18)	Ambiguous	[L].HAPATVcGPKKSTn.[L]	C7(Carbamidomethyl); N14(Deamidated)	1	1	QHD43416.1_S2_RBD	QHD43416.1_S2_RBD	0	3	0.6647	0	1	1	490.245	1468.72	1468.72	0.23	0.00011	HCD (High Energy Collision Dissociation)	MS2	55.3396	54	22.4002	5454	200428_Lumos_(LC1200)_nanoFlex_Ieva_SARS_CoV2_i1_Chy_Chymo_90min_ETD_HCD_2ul.raw	F11		5.07	FALSE	0	0.002703	1128780	22.51
		TRUE	High	Sequest HT (A18)	Ambiguous	[L].HAPATVcGPKKSTn.[L]	C7(Carbamidomethyl); N14(Deamidated)	1	1	QHD43416.1_S2_RBD	QHD43416.1_S2_RBD	0	3	0.5205	0	1	1	490.246	1468.72	1468.72	0.48	0.00023	HCD (High Energy Collision Dissociation)	MS2	16.0726	54	24.4631	6010	200428_Lumos_(LC1200)_nanoFlex_Ieva_SARS_CoV2_i1_Chy_Chymo_90min_ETD_HCD_2ul.raw	F11		3.9	FALSE	0	0.03418	5.00941e+06	24.55
	TRUE	High	[L].HAPATVCGPKKSTNL.[V]	1xCarbamidomethyl [C7]		FALSE	2.52943e-06	0	1	1	41	QHD43416.1_S2_RBD	QHD43416.1_S2_RBD [346-360]	0	1580.82	12966962675		High	High	0	4.842e-05	5.29	35.02
		Checked	Confidence	Identifying Node	PSM Ambiguity	Annotated Sequence	Modifications	# Protein Groups	# Proteins	Master Protein Accessions	Protein Accessions	# Missed Cleavages	Charge	DeltaScore	DeltaCn	Rank	Search Engine Rank	m/z [Da]	MH+ [Da]	Theo. MH+ [Da]	DeltaM [ppm]	Deltam/z [Da]	Activation Type	MS Order	Isolation Interference [%]	Ion Inject Time [ms]	RT [min]	First Scan	Spectrum File	File ID	Quan Info	XCorr	Contaminant	Percolator q-Value	Percolator PEP	Precursor Abundance	Apex RT [min]
		TRUE	High	Sequest HT (A2)	Unambiguous	[L].HAPATVcGPKKSTNL.[V]	C7(Carbamidomethyl)	1	1	QHD43416.1_S2_RBD	QHD43416.1_S2_RBD	0	3	0.5596	0	1	1	527.612	1580.82	1580.82	0.42	0.00022	ETD (Electron Transfer Dissociation)	MS2	23.7435	3.414	34.2189	8713	200428_Lumos_(LC1200)_nanoFlex_Ieva_SARS_CoV2_i1_Chy_Chymo_90min_ETD_HCD_2ul.raw	F11		5.2	FALSE	0	0.003715	5557401600	34.52
		TRUE	High	Sequest HT (A2)	Unambiguous	[L].HAPATVcGPKKSTNL.[V]	C7(Carbamidomethyl)	1	1	QHD43416.1_S2_RBD	QHD43416.1_S2_RBD	0	2	0.6931	0	1	1	790.914	1580.82	1580.82	-0.23	-0.00018	ETD (Electron Transfer Dissociation)	MS2	15.8858	16.291	34.2632	8725	200428_Lumos_(LC1200)_nanoFlex_Ieva_SARS_CoV2_i1_Chy_Chymo_90min_ETD_HCD_2ul.raw	F11		2.77	FALSE	0	0.008307	1310716032	34.52
		TRUE	High	Sequest HT (A2)	Unambiguous	[L].HAPATVcGPKKSTNL.[V]	C7(Carbamidomethyl)	1	1	QHD43416.1_S2_RBD	QHD43416.1_S2_RBD	0	3	0.6078	0	1	1	527.612	1580.82	1580.82	0.88	0.00046	ETD (Electron Transfer Dissociation)	MS2	0	0.105	34.5619	8806	200428_Lumos_(LC1200)_nanoFlex_Ieva_SARS_CoV2_i1_Chy_Chymo_90min_ETD_HCD_2ul.raw	F11		5.1	FALSE	0	0.02353	5557401600	34.52
		TRUE	High	Sequest HT (A2)	Unambiguous	[L].HAPATVcGPKKSTNL.[V]	C7(Carbamidomethyl)	1	1	QHD43416.1_S2_RBD	QHD43416.1_S2_RBD	0	2	0.6615	0	1	1	790.915	1580.82	1580.82	0.46	0.00037	ETD (Electron Transfer Dissociation)	MS2	0	0.625	34.6009	8816	200428_Lumos_(LC1200)_nanoFlex_Ieva_SARS_CoV2_i1_Chy_Chymo_90min_ETD_HCD_2ul.raw	F11		2.57	FALSE	0	0.0118	1310716032	34.52
		TRUE	High	Sequest HT (A2)	Unambiguous	[L].HAPATVcGPKKSTNL.[V]	C7(Carbamidomethyl)	1	1	QHD43416.1_S2_RBD	QHD43416.1_S2_RBD	0	3	0.5954	0	1	1	527.613	1580.82	1580.82	1.11	0.00059	ETD (Electron Transfer Dissociation)	MS2	0.661476	0.107	34.9087	8893	200428_Lumos_(LC1200)_nanoFlex_Ieva_SARS_CoV2_i1_Chy_Chymo_90min_ETD_HCD_2ul.raw	F11		5.19	FALSE	0	0.003478	6067962368	35.02
		TRUE	High	Sequest HT (A2)	Unambiguous	[L].HAPATVcGPKKSTNL.[V]	C7(Carbamidomethyl)	1	1	QHD43416.1_S2_RBD	QHD43416.1_S2_RBD	0	2	0.6801	0	1	1	790.915	1580.82	1580.82	1.24	0.00098	ETD (Electron Transfer Dissociation)	MS2	0	0.692	34.9402	8902	200428_Lumos_(LC1200)_nanoFlex_Ieva_SARS_CoV2_i1_Chy_Chymo_90min_ETD_HCD_2ul.raw	F11		2.72	FALSE	0	0.02003	1310716032	34.52
		TRUE	High	Sequest HT (A2)	Unambiguous	[L].HAPATVcGPKKSTNL.[V]	C7(Carbamidomethyl)	1	1	QHD43416.1_S2_RBD	QHD43416.1_S2_RBD	0	3	0.5996	0	1	1	527.613	1580.82	1580.82	1.34	0.00071	ETD (Electron Transfer Dissociation)	MS2	0.123902	0.139	35.2525	8982	200428_Lumos_(LC1200)_nanoFlex_Ieva_SARS_CoV2_i1_Chy_Chymo_90min_ETD_HCD_2ul.raw	F11		4.97	FALSE	0	0.00954	6067962368	35.02
		TRUE	High	Sequest HT (A2)	Unambiguous	[L].HAPATVcGPKKSTNL.[V]	C7(Carbamidomethyl)	1	1	QHD43416.1_S2_RBD	QHD43416.1_S2_RBD	0	2	0.6938	0	1	1	790.914	1580.82	1580.82	0.15	0.00012	ETD (Electron Transfer Dissociation)	MS2	0	0.835	35.2744	8988	200428_Lumos_(LC1200)_nanoFlex_Ieva_SARS_CoV2_i1_Chy_Chymo_90min_ETD_HCD_2ul.raw	F11		2.58	FALSE	0	0.01246	1310716032	34.52
		TRUE	High	Sequest HT (A2)	Unambiguous	[L].HAPATVcGPKKSTNL.[V]	C7(Carbamidomethyl)	1	1	QHD43416.1_S2_RBD	QHD43416.1_S2_RBD	0	3	0.5996	0	1	1	527.612	1580.82	1580.82	0.88	0.00046	ETD (Electron Transfer Dissociation)	MS2	0.115858	0.184	35.6013	9072	200428_Lumos_(LC1200)_nanoFlex_Ieva_SARS_CoV2_i1_Chy_Chymo_90min_ETD_HCD_2ul.raw	F11		5.07	FALSE	0	0.007443	6067962368	35.02
		TRUE	High	Sequest HT (A2)	Unambiguous	[L].HAPATVcGPKKSTNL.[V]	C7(Carbamidomethyl)	1	1	QHD43416.1_S2_RBD	QHD43416.1_S2_RBD	0	2	0.6456	0	1	1	790.914	1580.82	1580.82	0.15	0.00012	ETD (Electron Transfer Dissociation)	MS2	1.63177	1.931	35.6172	9077	200428_Lumos_(LC1200)_nanoFlex_Ieva_SARS_CoV2_i1_Chy_Chymo_90min_ETD_HCD_2ul.raw	F11		2.37	FALSE	0	0.01846	1310716032	34.52
		TRUE	High	Sequest HT (A2)	Unambiguous	[L].HAPATVcGPKKSTNL.[V]	C7(Carbamidomethyl)	1	1	QHD43416.1_S2_RBD	QHD43416.1_S2_RBD	0	3	0.5708	0	1	1	527.612	1580.82	1580.82	1	0.00052	ETD (Electron Transfer Dissociation)	MS2	19.793	0.693	35.9941	9183	200428_Lumos_(LC1200)_nanoFlex_Ieva_SARS_CoV2_i1_Chy_Chymo_90min_ETD_HCD_2ul.raw	F11		4.31	FALSE	0	0.004027	6067962368	35.02
		TRUE	High	Sequest HT (A2)	Unambiguous	[L].HAPATVcGPKKSTNL.[V]	C7(Carbamidomethyl)	1	1	QHD43416.1_S2_RBD	QHD43416.1_S2_RBD	0	2	0.645	0	1	1	790.914	1580.82	1580.82	0.15	0.00012	ETD (Electron Transfer Dissociation)	MS2	1.75494	7.1	36.0085	9187	200428_Lumos_(LC1200)_nanoFlex_Ieva_SARS_CoV2_i1_Chy_Chymo_90min_ETD_HCD_2ul.raw	F11		2.31	FALSE	0	0.02978
		TRUE	High	Sequest HT (A2)	Unambiguous	[L].HAPATVcGPKKSTNL.[V]	C7(Carbamidomethyl)	1	1	QHD43416.1_S2_RBD	QHD43416.1_S2_RBD	0	3	0.5556	0	1	1	527.612	1580.82	1580.82	-0.16	-9e-05	ETD (Electron Transfer Dissociation)	MS2	38.0404	12.568	36.3975	9293	200428_Lumos_(LC1200)_nanoFlex_Ieva_SARS_CoV2_i1_Chy_Chymo_90min_ETD_HCD_2ul.raw	F11		4.32	FALSE	0	0.02124	6067962368	35.02
		TRUE	High	Sequest HT (A2)	Unambiguous	[L].HAPATVcGPKKSTNL.[V]	C7(Carbamidomethyl)	1	1	QHD43416.1_S2_RBD	QHD43416.1_S2_RBD	0	3	0.4742	0	1	1	527.612	1580.82	1580.82	-0.28	-0.00015	ETD (Electron Transfer Dissociation)	MS2	11.3832	20.765	36.7413	9385	200428_Lumos_(LC1200)_nanoFlex_Ieva_SARS_CoV2_i1_Chy_Chymo_90min_ETD_HCD_2ul.raw	F11		4.07	FALSE	0	0.03587	6067962368	35.02
		TRUE	High	Sequest HT (A2)	Unambiguous	[L].HAPATVcGPKKSTNL.[V]	C7(Carbamidomethyl)	1	1	QHD43416.1_S2_RBD	QHD43416.1_S2_RBD	0	3	0.578	0	1	1	527.612	1580.82	1580.82	-0.16	-9e-05	ETD (Electron Transfer Dissociation)	MS2	24.5701	26.983	37.1314	9488	200428_Lumos_(LC1200)_nanoFlex_Ieva_SARS_CoV2_i1_Chy_Chymo_90min_ETD_HCD_2ul.raw	F11		5	FALSE	0	0.007005	6067962368	35.02
		TRUE	High	Sequest HT (A2)	Unambiguous	[L].HAPATVcGPKKSTNL.[V]	C7(Carbamidomethyl)	1	1	QHD43416.1_S2_RBD	QHD43416.1_S2_RBD	0	3	0.6115	0	1	1	527.612	1580.82	1580.82	0.76	0.0004	ETD (Electron Transfer Dissociation)	MS2	22.5097	11.28	37.497	9583	200428_Lumos_(LC1200)_nanoFlex_Ieva_SARS_CoV2_i1_Chy_Chymo_90min_ETD_HCD_2ul.raw	F11		4.89	FALSE	0	0.01423	26582552	38.18
		TRUE	High	Sequest HT (A2)	Unambiguous	[L].HAPATVcGPKKSTNL.[V]	C7(Carbamidomethyl)	1	1	QHD43416.1_S2_RBD	QHD43416.1_S2_RBD	0	3	0.5622	0	1	1	527.612	1580.82	1580.82	0.88	0.00046	ETD (Electron Transfer Dissociation)	MS2	19.3178	11.336	37.9194	9704	200428_Lumos_(LC1200)_nanoFlex_Ieva_SARS_CoV2_i1_Chy_Chymo_90min_ETD_HCD_2ul.raw	F11		4.66	FALSE	0	0.009602	26582552	38.18
		TRUE	High	Sequest HT (A2)	Unambiguous	[L].HAPATVcGPKKSTNL.[V]	C7(Carbamidomethyl)	1	1	QHD43416.1_S2_RBD	QHD43416.1_S2_RBD	0	3	0.5815	0	1	1	527.612	1580.82	1580.82	0.88	0.00046	ETD (Electron Transfer Dissociation)	MS2	56.1466	60.112	40.8091	10547	200428_Lumos_(LC1200)_nanoFlex_Ieva_SARS_CoV2_i1_Chy_Chymo_90min_ETD_HCD_2ul.raw	F11		4.11	FALSE	0	0.03224	4300123	41.35
		TRUE	High	Sequest HT (A2)	Unambiguous	[L].HAPATVcGPKKSTNL.[V]	C7(Carbamidomethyl)	1	1	QHD43416.1_S2_RBD	QHD43416.1_S2_RBD	0	3	0.2585	0	1	1	527.612	1580.82	1580.82	-0.05	-2e-05	ETD (Electron Transfer Dissociation)	MS2	55.7332	55.549	41.2165	10669	200428_Lumos_(LC1200)_nanoFlex_Ieva_SARS_CoV2_i1_Chy_Chymo_90min_ETD_HCD_2ul.raw	F11		2.36	FALSE	0	0.1368	4300123	41.35
		TRUE	Low	Sequest HT (A2)	Ambiguous	[L].HAPATVcGPKKSTNL.[V]	C7(Carbamidomethyl)	1	1	QHD43416.1_S2_RBD	QHD43416.1_S2_RBD	0	3	0.4595	0	1	1	527.612	1580.82	1580.82	0.3	0.00016	ETD (Electron Transfer Dissociation)	MS2	44.4028	20.756	41.606	10775	200428_Lumos_(LC1200)_nanoFlex_Ieva_SARS_CoV2_i1_Chy_Chymo_90min_ETD_HCD_2ul.raw	F11		2.59	FALSE	0.06909	0.6817	4300123	41.35
		TRUE	Low	Sequest HT (A14)	Ambiguous	[L].HAPATVcGPKKSTNL.[V]	C7(Carbamidomethyl)	1	1	QHD43416.1_S2_RBD	QHD43416.1_S2_RBD	0	3	0.4402	0	1	1	527.612	1580.82	1580.82	0.3	0.00016	ETD (Electron Transfer Dissociation)	MS2	44.4028	20.756	41.606	10775	200428_Lumos_(LC1200)_nanoFlex_Ieva_SARS_CoV2_i1_Chy_Chymo_90min_ETD_HCD_2ul.raw	F11		2.59	FALSE	0.2769	0.7391	4300123	41.35
		TRUE	High	Sequest HT (A16)	Unambiguous	[L].HAPATVcGPKKSTNL.[V]	C7(Carbamidomethyl)	1	1	QHD43416.1_S2_RBD	QHD43416.1_S2_RBD	0	3	0.6736	0	1	1	527.612	1580.82	1580.82	0.42	0.00022	HCD (High Energy Collision Dissociation)	MS2	23.7435	1.322	34.2301	8715	200428_Lumos_(LC1200)_nanoFlex_Ieva_SARS_CoV2_i1_Chy_Chymo_90min_ETD_HCD_2ul.raw	F11		5.27	FALSE	0	0.0003571	5557401600	34.52
		TRUE	High	Sequest HT (A16)	Unambiguous	[L].HAPATVcGPKKSTNL.[V]	C7(Carbamidomethyl)	1	1	QHD43416.1_S2_RBD	QHD43416.1_S2_RBD	0	2	0.7995	0	1	1	790.914	1580.82	1580.82	-0.23	-0.00018	HCD (High Energy Collision Dissociation)	MS2	15.8858	5.503	34.2712	8727	200428_Lumos_(LC1200)_nanoFlex_Ieva_SARS_CoV2_i1_Chy_Chymo_90min_ETD_HCD_2ul.raw	F11		4.09	FALSE	0	1.701e-05	1310716032	34.52
		TRUE	High	Sequest HT (A16)	Unambiguous	[L].HAPATVcGPKKSTNL.[V]	C7(Carbamidomethyl)	1	1	QHD43416.1_S2_RBD	QHD43416.1_S2_RBD	0	3	0.7335	0	1	1	527.612	1580.82	1580.82	0.88	0.00046	HCD (High Energy Collision Dissociation)	MS2	0	0.062	34.5719	8808	200428_Lumos_(LC1200)_nanoFlex_Ieva_SARS_CoV2_i1_Chy_Chymo_90min_ETD_HCD_2ul.raw	F11		5.29	FALSE	0	4.842e-05	5557401600	34.52
		TRUE	High	Sequest HT (A16)	Unambiguous	[L].HAPATVcGPKKSTNL.[V]	C7(Carbamidomethyl)	1	1	QHD43416.1_S2_RBD	QHD43416.1_S2_RBD	0	2	0.7967	0	1	1	790.915	1580.82	1580.82	0.46	0.00037	HCD (High Energy Collision Dissociation)	MS2	0	0.388	34.6089	8817	200428_Lumos_(LC1200)_nanoFlex_Ieva_SARS_CoV2_i1_Chy_Chymo_90min_ETD_HCD_2ul.raw	F11		3.69	FALSE	0	7.565e-05	1310716032	34.52
		TRUE	High	Sequest HT (A16)	Unambiguous	[L].HAPATVcGPKKSTNL.[V]	C7(Carbamidomethyl)	1	1	QHD43416.1_S2_RBD	QHD43416.1_S2_RBD	0	3	0.735	0	1	1	527.613	1580.82	1580.82	1.11	0.00059	HCD (High Energy Collision Dissociation)	MS2	0.661476	0.06	34.9189	8895	200428_Lumos_(LC1200)_nanoFlex_Ieva_SARS_CoV2_i1_Chy_Chymo_90min_ETD_HCD_2ul.raw	F11		4.83	FALSE	0	0.0006842	6067962368	35.02
		TRUE	High	Sequest HT (A16)	Unambiguous	[L].HAPATVcGPKKSTNL.[V]	C7(Carbamidomethyl)	1	1	QHD43416.1_S2_RBD	QHD43416.1_S2_RBD	0	2	0.7871	0	1	1	790.915	1580.82	1580.82	1.24	0.00098	HCD (High Energy Collision Dissociation)	MS2	0	0.354	34.9503	8904	200428_Lumos_(LC1200)_nanoFlex_Ieva_SARS_CoV2_i1_Chy_Chymo_90min_ETD_HCD_2ul.raw	F11		4.04	FALSE	0	4.847e-05	1310716032	34.52
		TRUE	High	Sequest HT (A16)	Unambiguous	[L].HAPATVcGPKKSTNL.[V]	C7(Carbamidomethyl)	1	1	QHD43416.1_S2_RBD	QHD43416.1_S2_RBD	0	3	0.6842	0	1	1	527.613	1580.82	1580.82	1.34	0.00071	HCD (High Energy Collision Dissociation)	MS2	0.123902	0.072	35.2624	8984	200428_Lumos_(LC1200)_nanoFlex_Ieva_SARS_CoV2_i1_Chy_Chymo_90min_ETD_HCD_2ul.raw	F11		4.56	FALSE	0	0.006914	6067962368	35.02
		TRUE	High	Sequest HT (A16)	Unambiguous	[L].HAPATVcGPKKSTNL.[V]	C7(Carbamidomethyl)	1	1	QHD43416.1_S2_RBD	QHD43416.1_S2_RBD	0	2	0.8118	0	1	1	790.914	1580.82	1580.82	0.15	0.00012	HCD (High Energy Collision Dissociation)	MS2	0	0.97	35.2842	8990	200428_Lumos_(LC1200)_nanoFlex_Ieva_SARS_CoV2_i1_Chy_Chymo_90min_ETD_HCD_2ul.raw	F11		4.25	FALSE	0	2.514e-06	1310716032	34.52
		TRUE	High	Sequest HT (A16)	Unambiguous	[L].HAPATVcGPKKSTNL.[V]	C7(Carbamidomethyl)	1	1	QHD43416.1_S2_RBD	QHD43416.1_S2_RBD	0	3	0.614	0	1	1	527.612	1580.82	1580.82	0.88	0.00046	HCD (High Energy Collision Dissociation)	MS2	0.115858	0.106	35.6116	9074	200428_Lumos_(LC1200)_nanoFlex_Ieva_SARS_CoV2_i1_Chy_Chymo_90min_ETD_HCD_2ul.raw	F11		4.56	FALSE	0	0.0008914	6067962368	35.02
		TRUE	High	Sequest HT (A16)	Unambiguous	[L].HAPATVcGPKKSTNL.[V]	C7(Carbamidomethyl)	1	1	QHD43416.1_S2_RBD	QHD43416.1_S2_RBD	0	2	0.7673	0	1	1	790.914	1580.82	1580.82	0.15	0.00012	HCD (High Energy Collision Dissociation)	MS2	1.63177	1.209	35.6273	9079	200428_Lumos_(LC1200)_nanoFlex_Ieva_SARS_CoV2_i1_Chy_Chymo_90min_ETD_HCD_2ul.raw	F11		3.91	FALSE	0	2.723e-05	1310716032	34.52
		TRUE	High	Sequest HT (A16)	Unambiguous	[L].HAPATVcGPKKSTNL.[V]	C7(Carbamidomethyl)	1	1	QHD43416.1_S2_RBD	QHD43416.1_S2_RBD	0	3	0.6761	0	1	1	527.612	1580.82	1580.82	1	0.00052	HCD (High Energy Collision Dissociation)	MS2	19.793	0.442	36.0042	9185	200428_Lumos_(LC1200)_nanoFlex_Ieva_SARS_CoV2_i1_Chy_Chymo_90min_ETD_HCD_2ul.raw	F11		4.94	FALSE	0	0.0006026	6067962368	35.02
		TRUE	High	Sequest HT (A16)	Unambiguous	[L].HAPATVcGPKKSTNL.[V]	C7(Carbamidomethyl)	1	1	QHD43416.1_S2_RBD	QHD43416.1_S2_RBD	0	2	0.7531	0	1	1	790.914	1580.82	1580.82	0.15	0.00012	HCD (High Energy Collision Dissociation)	MS2	1.75494	6.45	36.0162	9189	200428_Lumos_(LC1200)_nanoFlex_Ieva_SARS_CoV2_i1_Chy_Chymo_90min_ETD_HCD_2ul.raw	F11		4.01	FALSE	0	0.0002251
		TRUE	High	Sequest HT (A16)	Unambiguous	[L].HAPATVcGPKKSTNL.[V]	C7(Carbamidomethyl)	1	1	QHD43416.1_S2_RBD	QHD43416.1_S2_RBD	0	3	0.4601	0	1	1	527.612	1580.82	1580.82	-0.16	-9e-05	HCD (High Energy Collision Dissociation)	MS2	38.0404	12.725	36.4085	9295	200428_Lumos_(LC1200)_nanoFlex_Ieva_SARS_CoV2_i1_Chy_Chymo_90min_ETD_HCD_2ul.raw	F11		4.89	FALSE	0	0.0049	6067962368	35.02
		TRUE	High	Sequest HT (A16)	Unambiguous	[L].HAPATVcGPKKSTNL.[V]	C7(Carbamidomethyl)	1	1	QHD43416.1_S2_RBD	QHD43416.1_S2_RBD	0	3	0.4303	0	1	1	527.612	1580.82	1580.82	-0.28	-0.00015	HCD (High Energy Collision Dissociation)	MS2	11.3832	11.345	36.7542	9387	200428_Lumos_(LC1200)_nanoFlex_Ieva_SARS_CoV2_i1_Chy_Chymo_90min_ETD_HCD_2ul.raw	F11		3.37	FALSE	0	0.02129	6067962368	35.02
		TRUE	High	Sequest HT (A16)	Unambiguous	[L].HAPATVcGPKKSTNL.[V]	C7(Carbamidomethyl)	1	1	QHD43416.1_S2_RBD	QHD43416.1_S2_RBD	0	3	0.6689	0	1	1	527.612	1580.82	1580.82	-0.16	-9e-05	HCD (High Energy Collision Dissociation)	MS2	24.5701	13.506	37.142	9490	200428_Lumos_(LC1200)_nanoFlex_Ieva_SARS_CoV2_i1_Chy_Chymo_90min_ETD_HCD_2ul.raw	F11		4.41	FALSE	0	0.000973	6067962368	35.02
		TRUE	High	Sequest HT (A16)	Unambiguous	[L].HAPATVcGPKKSTNL.[V]	C7(Carbamidomethyl)	1	1	QHD43416.1_S2_RBD	QHD43416.1_S2_RBD	0	3	0.6545	0	1	1	527.612	1580.82	1580.82	0.76	0.0004	HCD (High Energy Collision Dissociation)	MS2	22.5097	14.386	37.5089	9585	200428_Lumos_(LC1200)_nanoFlex_Ieva_SARS_CoV2_i1_Chy_Chymo_90min_ETD_HCD_2ul.raw	F11		5.21	FALSE	0	0.0008623	26582552	38.18
		TRUE	High	Sequest HT (A16)	Unambiguous	[L].HAPATVcGPKKSTNL.[V]	C7(Carbamidomethyl)	1	1	QHD43416.1_S2_RBD	QHD43416.1_S2_RBD	0	3	0.6486	0	1	1	527.612	1580.82	1580.82	0.88	0.00046	HCD (High Energy Collision Dissociation)	MS2	19.3178	5.219	37.9311	9706	200428_Lumos_(LC1200)_nanoFlex_Ieva_SARS_CoV2_i1_Chy_Chymo_90min_ETD_HCD_2ul.raw	F11		4.24	FALSE	0	0.02642	26582552	38.18
		TRUE	High	Sequest HT (A16)	Unambiguous	[L].HAPATVcGPKKSTNL.[V]	C7(Carbamidomethyl)	1	1	QHD43416.1_S2_RBD	QHD43416.1_S2_RBD	0	3	0.6202	0	1	1	527.612	1580.82	1580.82	0.88	0.00046	HCD (High Energy Collision Dissociation)	MS2	56.1466	14.865	40.8197	10549	200428_Lumos_(LC1200)_nanoFlex_Ieva_SARS_CoV2_i1_Chy_Chymo_90min_ETD_HCD_2ul.raw	F11		2.58	FALSE	0.003547	0.2173	4300123	41.35
		TRUE	High	Sequest HT (A16)	Unambiguous	[L].HAPATVcGPKKSTNL.[V]	C7(Carbamidomethyl)	1	1	QHD43416.1_S2_RBD	QHD43416.1_S2_RBD	0	3	0.4014	0	1	1	527.612	1580.82	1580.82	-0.05	-2e-05	HCD (High Energy Collision Dissociation)	MS2	55.7332	44.634	41.2304	10672	200428_Lumos_(LC1200)_nanoFlex_Ieva_SARS_CoV2_i1_Chy_Chymo_90min_ETD_HCD_2ul.raw	F11		2.94	FALSE	0.003547	0.2247	4300123	41.35
		TRUE	Low	Sequest HT (A16)	Ambiguous	[L].HAPATVcGPKKSTNL.[V]	C7(Carbamidomethyl)	1	1	QHD43416.1_S2_RBD	QHD43416.1_S2_RBD	0	3		0.0286	2	2	527.612	1580.82	1580.82	0.3	0.00016	HCD (High Energy Collision Dissociation)	MS2	44.4028	15.356	41.6174	10777	200428_Lumos_(LC1200)_nanoFlex_Ieva_SARS_CoV2_i1_Chy_Chymo_90min_ETD_HCD_2ul.raw	F11		1.7	FALSE	0.7477	1	4300123	41.35
	TRUE	High	[L].HAPATVCGPKKSTNL.[V]	1xCarbamidomethyl [C7]; 1xDeamidated [N14]		FALSE	0.00388263	0	1	1	9	QHD43416.1_S2_RBD	QHD43416.1_S2_RBD [346-360]	0	1581.81	2.89571e+06		High	High	0	0.02243	5.27	37.69
		Checked	Confidence	Identifying Node	PSM Ambiguity	Annotated Sequence	Modifications	# Protein Groups	# Proteins	Master Protein Accessions	Protein Accessions	# Missed Cleavages	Charge	DeltaScore	DeltaCn	Rank	Search Engine Rank	m/z [Da]	MH+ [Da]	Theo. MH+ [Da]	DeltaM [ppm]	Deltam/z [Da]	Activation Type	MS Order	Isolation Interference [%]	Ion Inject Time [ms]	RT [min]	First Scan	Spectrum File	File ID	Quan Info	XCorr	Contaminant	Percolator q-Value	Percolator PEP	Precursor Abundance	Apex RT [min]
		TRUE	High	Sequest HT (A2)	Unambiguous	[L].HAPATVcGPKKSTnL.[V]	C7(Carbamidomethyl); N14(Deamidated)	1	1	QHD43416.1_S2_RBD	QHD43416.1_S2_RBD	0	3	0.6433	0	1	1	527.94	1581.81	1581.81	0.18	9e-05	ETD (Electron Transfer Dissociation)	MS2	55.0814	20.433	37.7032	9643	200428_Lumos_(LC1200)_nanoFlex_Ieva_SARS_CoV2_i1_Chy_Chymo_90min_ETD_HCD_2ul.raw	F11		5.27	FALSE	0	0.02243	2.89571e+06	37.69
		TRUE	Low	Sequest HT (A2)	Ambiguous	[L].HAPATVcGPKKSTnL.[V]	C7(Carbamidomethyl); N14(Deamidated)	1	1	QHD43416.1_S2_RBD	QHD43416.1_S2_RBD	0	3	0.316	0	1	1	527.94	1581.8	1581.81	-0.28	-0.00015	ETD (Electron Transfer Dissociation)	MS2	55.2041	17.125	39.5167	10169	200428_Lumos_(LC1200)_nanoFlex_Ieva_SARS_CoV2_i1_Chy_Chymo_90min_ETD_HCD_2ul.raw	F11		2.88	FALSE	0.07535	0.7054
		TRUE	High	Sequest HT (A2)	Unambiguous	[L].HAPATVcGPKKSTnL.[V]	C7(Carbamidomethyl); N14(Deamidated)	1	1	QHD43416.1_S2_RBD	QHD43416.1_S2_RBD	0	3	0.269	0	1	1	527.94	1581.81	1581.81	0.99	0.00052	ETD (Electron Transfer Dissociation)	MS2	0	9.419	39.8551	10264	200428_Lumos_(LC1200)_nanoFlex_Ieva_SARS_CoV2_i1_Chy_Chymo_90min_ETD_HCD_2ul.raw	F11		2.9	FALSE	0.001755	0.264
		TRUE	High	Sequest HT (A2)	Unambiguous	[L].HAPATVcGPKKSTnL.[V]	C7(Carbamidomethyl); N14(Deamidated)	1	1	QHD43416.1_S2_RBD	QHD43416.1_S2_RBD	0	3	0.3385	0	1	1	527.94	1581.81	1581.81	-0.05	-3e-05	ETD (Electron Transfer Dissociation)	MS2	12.4123	24.908	40.2941	10395	200428_Lumos_(LC1200)_nanoFlex_Ieva_SARS_CoV2_i1_Chy_Chymo_90min_ETD_HCD_2ul.raw	F11		2.6	FALSE	0	0.125
		TRUE	High	Sequest HT (A14)	Ambiguous	[L].HAPATVcGPKKSTnL.[V]	C7(Carbamidomethyl); N14(Deamidated)	1	1	QHD43416.1_S2_RBD	QHD43416.1_S2_RBD	0	3	0.1597	0	1	1	527.94	1581.8	1581.81	-0.28	-0.00015	ETD (Electron Transfer Dissociation)	MS2	55.2041	17.125	39.5167	10169	200428_Lumos_(LC1200)_nanoFlex_Ieva_SARS_CoV2_i1_Chy_Chymo_90min_ETD_HCD_2ul.raw	F11		2.88	FALSE	0	0.1509
		TRUE	High	Sequest HT (A16)	Unambiguous	[L].HAPATVcGPKKSTnL.[V]	C7(Carbamidomethyl); N14(Deamidated)	1	1	QHD43416.1_S2_RBD	QHD43416.1_S2_RBD	0	3	0.6547	0	1	1	527.94	1581.81	1581.81	0.18	9e-05	HCD (High Energy Collision Dissociation)	MS2	55.0814	13.148	37.7119	9645	200428_Lumos_(LC1200)_nanoFlex_Ieva_SARS_CoV2_i1_Chy_Chymo_90min_ETD_HCD_2ul.raw	F11		5.01	FALSE	0	0.005062	2.89571e+06	37.69
		TRUE	High	Sequest HT (A16)	Unambiguous	[L].HAPATVcGPKKSTnL.[V]	C7(Carbamidomethyl); N14(Deamidated)	1	1	QHD43416.1_S2_RBD	QHD43416.1_S2_RBD	0	3	0.5811	0	1	1	527.94	1581.8	1581.81	-0.28	-0.00015	HCD (High Energy Collision Dissociation)	MS2	55.2041	13.62	39.5248	10171	200428_Lumos_(LC1200)_nanoFlex_Ieva_SARS_CoV2_i1_Chy_Chymo_90min_ETD_HCD_2ul.raw	F11		3.39	FALSE	0.0009362	0.07974
		TRUE	High	Sequest HT (A16)	Unambiguous	[L].HAPATVcGPKKSTnL.[V]	C7(Carbamidomethyl); N14(Deamidated)	1	1	QHD43416.1_S2_RBD	QHD43416.1_S2_RBD	0	3	0.4866	0	1	1	527.94	1581.81	1581.81	0.99	0.00052	HCD (High Energy Collision Dissociation)	MS2	0	5.706	39.8648	10265	200428_Lumos_(LC1200)_nanoFlex_Ieva_SARS_CoV2_i1_Chy_Chymo_90min_ETD_HCD_2ul.raw	F11		3.74	FALSE	0	0.008849
		TRUE	High	Sequest HT (A16)	Unambiguous	[L].HAPATVcGPKKSTnL.[V]	C7(Carbamidomethyl); N14(Deamidated)	1	1	QHD43416.1_S2_RBD	QHD43416.1_S2_RBD	0	3	0.5527	0	1	1	527.94	1581.81	1581.81	-0.05	-3e-05	HCD (High Energy Collision Dissociation)	MS2	12.4123	18.392	40.3045	10397	200428_Lumos_(LC1200)_nanoFlex_Ieva_SARS_CoV2_i1_Chy_Chymo_90min_ETD_HCD_2ul.raw	F11		3.51	FALSE	0	0.02568
	TRUE	High	[L].HAPATVCGPKKSTNL.[V]	1xCarbamidomethyl [C7]; 1xHexNAc [T5]	QHD43416.1_S2_RBD 1xHexNAc [T350]	FALSE	0.00148952	0	1	1	3	QHD43416.1_S2_RBD	QHD43416.1_S2_RBD [346-360]	0	1783.9	3.92122e+06		High	High	0	0.004023	5.3	37.03
		Checked	Confidence	Identifying Node	PSM Ambiguity	Annotated Sequence	Modifications	# Protein Groups	# Proteins	Master Protein Accessions	Protein Accessions	# Missed Cleavages	Charge	DeltaScore	DeltaCn	Rank	Search Engine Rank	m/z [Da]	MH+ [Da]	Theo. MH+ [Da]	DeltaM [ppm]	Deltam/z [Da]	Activation Type	MS Order	Isolation Interference [%]	Ion Inject Time [ms]	RT [min]	First Scan	Spectrum File	File ID	Quan Info	XCorr	Contaminant	Percolator q-Value	Percolator PEP	Precursor Abundance	Apex RT [min]
		TRUE	High	Sequest HT (A2)	Unambiguous	[L].HAPAtVcGPKKSTNL.[V]	T5(HexNAc); C7(Carbamidomethyl)	1	1	QHD43416.1_S2_RBD	QHD43416.1_S2_RBD	0	3	0.5189	0	1	1	595.305	1783.9	1783.9	-0.06	-3e-05	ETD (Electron Transfer Dissociation)	MS2	9.4458	37.816	37.0816	9474	200428_Lumos_(LC1200)_nanoFlex_Ieva_SARS_CoV2_i1_Chy_Chymo_90min_ETD_HCD_2ul.raw	F11		5.3	FALSE	0	0.004023	3.92122e+06	37.03
		TRUE	Medium	Sequest HT (A16)	Ambiguous	[L].HAPAtVcGPKKSTNL.[V]	T5(HexNAc); C7(Carbamidomethyl)	1	1	QHD43416.1_S2_RBD	QHD43416.1_S2_RBD	0	3	0.2034	0	1	1	595.305	1783.9	1783.9	-0.06	-3e-05	HCD (High Energy Collision Dissociation)	MS2	9.4458	25.873	37.0894	9476	200428_Lumos_(LC1200)_nanoFlex_Ieva_SARS_CoV2_i1_Chy_Chymo_90min_ETD_HCD_2ul.raw	F11		2.36	FALSE	0.04357	0.5173	3.92122e+06	37.03
		TRUE	Low	Sequest HT (A18)	Ambiguous	[L].HAPAtVcGPKKSTNL.[V]	T5(HexNAc); C7(Carbamidomethyl)	1	1	QHD43416.1_S2_RBD	QHD43416.1_S2_RBD	0	3	0.2034	0	1	1	595.305	1783.9	1783.9	-0.06	-3e-05	HCD (High Energy Collision Dissociation)	MS2	9.4458	25.873	37.0894	9476	200428_Lumos_(LC1200)_nanoFlex_Ieva_SARS_CoV2_i1_Chy_Chymo_90min_ETD_HCD_2ul.raw	F11		2.36	FALSE	0.1028	0.6641	3.92122e+06	37.03
	TRUE	High	[L].HAPATVCGPKKSTNLVK.[N]	1xCarbamidomethyl [C7]		FALSE	0.00017539	0	1	1	4	QHD43416.1_S2_RBD	QHD43416.1_S2_RBD [346-362]	1	1807.98	35857585		High	High	0	0.0006146	6.99	33.58
		Checked	Confidence	Identifying Node	PSM Ambiguity	Annotated Sequence	Modifications	# Protein Groups	# Proteins	Master Protein Accessions	Protein Accessions	# Missed Cleavages	Charge	DeltaScore	DeltaCn	Rank	Search Engine Rank	m/z [Da]	MH+ [Da]	Theo. MH+ [Da]	DeltaM [ppm]	Deltam/z [Da]	Activation Type	MS Order	Isolation Interference [%]	Ion Inject Time [ms]	RT [min]	First Scan	Spectrum File	File ID	Quan Info	XCorr	Contaminant	Percolator q-Value	Percolator PEP	Precursor Abundance	Apex RT [min]
		TRUE	High	Sequest HT (A14)	Ambiguous	[L].HAPATVcGPKKSTNLVK.[N]	C7(Carbamidomethyl)	1	1	QHD43416.1_S2_RBD	QHD43416.1_S2_RBD	1	4	0.6824	0	1	1	452.752	1807.98	1807.98	-0.18	-8e-05	ETD (Electron Transfer Dissociation)	MS2	17.8615	26.846	33.4586	8488	200428_Lumos_(LC1200)_nanoFlex_Ieva_SARS_CoV2_i1_Chy_Chymo_90min_ETD_HCD_2ul.raw	F11		6.99	FALSE	0	0.0006146	26044248	33.58
		TRUE	High	Sequest HT (A14)	Ambiguous	[L].HAPATVcGPKKSTNLVK.[N]	C7(Carbamidomethyl)	1	1	QHD43416.1_S2_RBD	QHD43416.1_S2_RBD	1	3	0.7008	0	1	1	603.333	1807.98	1807.98	-0.03	-2e-05	ETD (Electron Transfer Dissociation)	MS2	26.2001	32.946	33.5835	8521	200428_Lumos_(LC1200)_nanoFlex_Ieva_SARS_CoV2_i1_Chy_Chymo_90min_ETD_HCD_2ul.raw	F11		6.25	FALSE	0	0.0005746	9813337	33.56
		TRUE	High	Sequest HT (A18)	Ambiguous	[L].HAPATVcGPKKSTNLVK.[N]	C7(Carbamidomethyl)	1	1	QHD43416.1_S2_RBD	QHD43416.1_S2_RBD	1	4	0.5546	0	1	1	452.752	1807.98	1807.98	-0.18	-8e-05	HCD (High Energy Collision Dissociation)	MS2	17.8615	11.392	33.4683	8490	200428_Lumos_(LC1200)_nanoFlex_Ieva_SARS_CoV2_i1_Chy_Chymo_90min_ETD_HCD_2ul.raw	F11		4.85	FALSE	0	0.0193	26044248	33.58
		TRUE	High	Sequest HT (A18)	Ambiguous	[L].HAPATVcGPKKSTNLVK.[N]	C7(Carbamidomethyl)	1	1	QHD43416.1_S2_RBD	QHD43416.1_S2_RBD	1	3	0.5565	0	1	1	603.333	1807.98	1807.98	-0.03	-2e-05	HCD (High Energy Collision Dissociation)	MS2	26.2001	9.175	33.5958	8523	200428_Lumos_(LC1200)_nanoFlex_Ieva_SARS_CoV2_i1_Chy_Chymo_90min_ETD_HCD_2ul.raw	F11		4.51	FALSE	0	0.000488	9813337	33.56
	TRUE	High	[L].HAPATVCGPKKSTNLVK.[N]	1xCarbamidomethyl [C7]; 1xDeamidated [N14]		FALSE	0.00346516	0	1	1	2	QHD43416.1_S2_RBD	QHD43416.1_S2_RBD [346-362]	1	1808.97	3.31326e+06		High	High	0	0.003999	6.62	36.74
		Checked	Confidence	Identifying Node	PSM Ambiguity	Annotated Sequence	Modifications	# Protein Groups	# Proteins	Master Protein Accessions	Protein Accessions	# Missed Cleavages	Charge	DeltaScore	DeltaCn	Rank	Search Engine Rank	m/z [Da]	MH+ [Da]	Theo. MH+ [Da]	DeltaM [ppm]	Deltam/z [Da]	Activation Type	MS Order	Isolation Interference [%]	Ion Inject Time [ms]	RT [min]	First Scan	Spectrum File	File ID	Quan Info	XCorr	Contaminant	Percolator q-Value	Percolator PEP	Precursor Abundance	Apex RT [min]
		TRUE	High	Sequest HT (A14)	Ambiguous	[L].HAPATVcGPKKSTnLVK.[N]	C7(Carbamidomethyl); N14(Deamidated)	1	1	QHD43416.1_S2_RBD	QHD43416.1_S2_RBD	1	4	0.6541	0	1	1	452.997	1808.97	1808.97	-0.45	-0.0002	ETD (Electron Transfer Dissociation)	MS2	31.0969	64.49	36.5999	9345	200428_Lumos_(LC1200)_nanoFlex_Ieva_SARS_CoV2_i1_Chy_Chymo_90min_ETD_HCD_2ul.raw	F11		6.62	FALSE	0	0.003999	3.31326e+06	36.74
		TRUE	High	Sequest HT (A18)	Ambiguous	[L].HAPATVcGPKKSTnLVK.[N]	C7(Carbamidomethyl); N14(Deamidated)	1	1	QHD43416.1_S2_RBD	QHD43416.1_S2_RBD	1	4	0.6452	0	1	1	452.997	1808.97	1808.97	-0.45	-0.0002	HCD (High Energy Collision Dissociation)	MS2	31.0969	30.323	36.6093	9346	200428_Lumos_(LC1200)_nanoFlex_Ieva_SARS_CoV2_i1_Chy_Chymo_90min_ETD_HCD_2ul.raw	F11		4.82	FALSE	0	0.01382	3.31326e+06	36.74
	TRUE	High	[L].HAPATVCGPKKSTNLVKN.[K]	1xCarbamidomethyl [C7]		FALSE	7.73977e-05	0	1	1	6	QHD43416.1_S2_RBD	QHD43416.1_S2_RBD [346-363]	1	1922.03	4.49668e+07		High	High	0	8.97e-05	8.67	33.47
		Checked	Confidence	Identifying Node	PSM Ambiguity	Annotated Sequence	Modifications	# Protein Groups	# Proteins	Master Protein Accessions	Protein Accessions	# Missed Cleavages	Charge	DeltaScore	DeltaCn	Rank	Search Engine Rank	m/z [Da]	MH+ [Da]	Theo. MH+ [Da]	DeltaM [ppm]	Deltam/z [Da]	Activation Type	MS Order	Isolation Interference [%]	Ion Inject Time [ms]	RT [min]	First Scan	Spectrum File	File ID	Quan Info	XCorr	Contaminant	Percolator q-Value	Percolator PEP	Precursor Abundance	Apex RT [min]
		TRUE	High	Sequest HT (A14)	Ambiguous	[L].HAPATVcGPKKSTNLVKN.[K]	C7(Carbamidomethyl)	1	1	QHD43416.1_S2_RBD	QHD43416.1_S2_RBD	1	4	0.7064	0	1	1	481.262	1922.03	1922.03	0.11	5e-05	ETD (Electron Transfer Dissociation)	MS2	46.5769	82.088	32.8673	8331	200428_Lumos_(LC1200)_nanoFlex_Ieva_SARS_CoV2_i1_Chy_Chymo_90min_ETD_HCD_2ul.raw	F11		6.71	FALSE	0	0.0001161	1.44787e+06	32.89
		TRUE	High	Sequest HT (A14)	Ambiguous	[L].HAPATVcGPKKSTNLVKN.[K]	C7(Carbamidomethyl)	1	1	QHD43416.1_S2_RBD	QHD43416.1_S2_RBD	1	4	0.6955	0	1	1	481.262	1922.03	1922.03	-0.08	-4e-05	ETD (Electron Transfer Dissociation)	MS2	28.3954	28.616	33.3337	8452	200428_Lumos_(LC1200)_nanoFlex_Ieva_SARS_CoV2_i1_Chy_Chymo_90min_ETD_HCD_2ul.raw	F11		8.67	FALSE	0	8.97e-05	33906256	33.47
		TRUE	High	Sequest HT (A14)	Ambiguous	[L].HAPATVcGPKKSTNLVKN.[K]	C7(Carbamidomethyl)	1	1	QHD43416.1_S2_RBD	QHD43416.1_S2_RBD	1	3	0.7005	0	1	1	641.347	1922.03	1922.03	-0.84	-0.00054	ETD (Electron Transfer Dissociation)	MS2	16.7267	20.887	33.4818	8495	200428_Lumos_(LC1200)_nanoFlex_Ieva_SARS_CoV2_i1_Chy_Chymo_90min_ETD_HCD_2ul.raw	F11		6.61	FALSE	0	0.0005431	9612651	33.47
		TRUE	High	Sequest HT (A18)	Ambiguous	[L].HAPATVcGPKKSTNLVKN.[K]	C7(Carbamidomethyl)	1	1	QHD43416.1_S2_RBD	QHD43416.1_S2_RBD	1	4	0.445	0	1	1	481.262	1922.03	1922.03	0.11	5e-05	HCD (High Energy Collision Dissociation)	MS2	46.5769	43.888	32.8787	8333	200428_Lumos_(LC1200)_nanoFlex_Ieva_SARS_CoV2_i1_Chy_Chymo_90min_ETD_HCD_2ul.raw	F11		3.91	FALSE	0.004512	0.2054	1.44787e+06	32.89
		TRUE	Low	Sequest HT (A18)	Ambiguous	[L].HAPATVcGPKKSTNLVKN.[K]	C7(Carbamidomethyl)	1	1	QHD43416.1_S2_RBD	QHD43416.1_S2_RBD	1	4	0.4231	0	1	1	481.262	1922.03	1922.03	-0.08	-4e-05	HCD (High Energy Collision Dissociation)	MS2	28.3954	20.556	33.3435	8454	200428_Lumos_(LC1200)_nanoFlex_Ieva_SARS_CoV2_i1_Chy_Chymo_90min_ETD_HCD_2ul.raw	F11		4.16	FALSE	0.273	0.8152	33906256	33.47
		TRUE	Low	Sequest HT (A18)	Ambiguous	[L].HAPATVcGPKKSTNLVKN.[K]	C7(Carbamidomethyl)	1	1	QHD43416.1_S2_RBD	QHD43416.1_S2_RBD	1	3	0.4033	0	1	1	641.347	1922.03	1922.03	-0.84	-0.00054	HCD (High Energy Collision Dissociation)	MS2	16.7267	11.331	33.4925	8497	200428_Lumos_(LC1200)_nanoFlex_Ieva_SARS_CoV2_i1_Chy_Chymo_90min_ETD_HCD_2ul.raw	F11		3	FALSE	0.09105	0.6404	9612651	33.47
	TRUE	High	[L].HAPATVCGPKKSTNLVKN.[K]	1xCarbamidomethyl [C7]; 1xDeamidated [N14]		FALSE	4.95382e-05	0	1	1	16	QHD43416.1_S2_RBD	QHD43416.1_S2_RBD [346-363]	1	1923.01	9.6554e+07		High	High	0	0.0003117	8.76	36.16
		Checked	Confidence	Identifying Node	PSM Ambiguity	Annotated Sequence	Modifications	# Protein Groups	# Proteins	Master Protein Accessions	Protein Accessions	# Missed Cleavages	Charge	DeltaScore	DeltaCn	Rank	Search Engine Rank	m/z [Da]	MH+ [Da]	Theo. MH+ [Da]	DeltaM [ppm]	Deltam/z [Da]	Activation Type	MS Order	Isolation Interference [%]	Ion Inject Time [ms]	RT [min]	First Scan	Spectrum File	File ID	Quan Info	XCorr	Contaminant	Percolator q-Value	Percolator PEP	Precursor Abundance	Apex RT [min]
		TRUE	High	Sequest HT (A14)	Ambiguous	[L].HAPATVcGPKKSTnLVKN.[K]	C7(Carbamidomethyl); N14(Deamidated)	1	1	QHD43416.1_S2_RBD	QHD43416.1_S2_RBD	1	3	0.297	0	1	1	641.675	1923.01	1923.01	-0.08	-5e-05	ETD (Electron Transfer Dissociation)	MS2	0	50.341	35.9825	9180	200428_Lumos_(LC1200)_nanoFlex_Ieva_SARS_CoV2_i1_Chy_Chymo_90min_ETD_HCD_2ul.raw	F11		6.33	FALSE	0	0.001778	19376600	36.17
		TRUE	High	Sequest HT (A14)	Ambiguous	[L].HAPATVcGPKKSTnLVKN.[K]	C7(Carbamidomethyl); N14(Deamidated)	1	1	QHD43416.1_S2_RBD	QHD43416.1_S2_RBD	1	4	0.1952	0	1	1	481.509	1923.01	1923.01	0.49	0.00023	ETD (Electron Transfer Dissociation)	MS2	59.7052	22.974	36.0124	9188	200428_Lumos_(LC1200)_nanoFlex_Ieva_SARS_CoV2_i1_Chy_Chymo_90min_ETD_HCD_2ul.raw	F11		8.35	FALSE	0	5.735e-05	38680016	36.16
		TRUE	High	Sequest HT (A14)	Ambiguous	[L].HAPATVcGPKKSTnLVKN.[K]	C7(Carbamidomethyl); N14(Deamidated)	1	1	QHD43416.1_S2_RBD	QHD43416.1_S2_RBD	1	2	0.3534	0	1	1	962.01	1923.01	1923.01	0.5	0.00048	ETD (Electron Transfer Dissociation)	MS2	0	86	36.2011	9243	200428_Lumos_(LC1200)_nanoFlex_Ieva_SARS_CoV2_i1_Chy_Chymo_90min_ETD_HCD_2ul.raw	F11		2.66	FALSE	0	0.002812	1.6694e+06	36.18
		TRUE	High	Sequest HT (A14)	Ambiguous	[L].HAPATVcGPKKSTnLVKN.[K]	C7(Carbamidomethyl); N14(Deamidated)	1	1	QHD43416.1_S2_RBD	QHD43416.1_S2_RBD	1	3	0.2913	0	1	1	641.676	1923.01	1923.01	0.68	0.00044	ETD (Electron Transfer Dissociation)	MS2	6.59199	30.312	36.3577	9282	200428_Lumos_(LC1200)_nanoFlex_Ieva_SARS_CoV2_i1_Chy_Chymo_90min_ETD_HCD_2ul.raw	F11		5.87	FALSE	0	0.0009234	19376600	36.17
		TRUE	High	Sequest HT (A14)	Ambiguous	[L].HAPATVcGPKKSTnLVKN.[K]	C7(Carbamidomethyl); N14(Deamidated)	1	1	QHD43416.1_S2_RBD	QHD43416.1_S2_RBD	1	4	0.1474	0	1	1	481.508	1923.01	1923.01	-0.21	-0.0001	ETD (Electron Transfer Dissociation)	MS2	40.0312	35.341	36.6648	9363	200428_Lumos_(LC1200)_nanoFlex_Ieva_SARS_CoV2_i1_Chy_Chymo_90min_ETD_HCD_2ul.raw	F11		6.99	FALSE	0	0.01003	38680016	36.16
		TRUE	High	Sequest HT (A14)	Ambiguous	[L].HAPATVcGPKKSTnLVKN.[K]	C7(Carbamidomethyl); N14(Deamidated)	1	1	QHD43416.1_S2_RBD	QHD43416.1_S2_RBD	1	3	0.3011	0	1	1	641.675	1923.01	1923.01	-0.65	-0.00042	ETD (Electron Transfer Dissociation)	MS2	31.174	62.107	36.8369	9408	200428_Lumos_(LC1200)_nanoFlex_Ieva_SARS_CoV2_i1_Chy_Chymo_90min_ETD_HCD_2ul.raw	F11		5.38	FALSE	0	0.0001406	1.41681e+06	36.82
		TRUE	High	Sequest HT (A14)	Ambiguous	[L].HAPATVcGPKKSTnLVKN.[K]	C7(Carbamidomethyl); N14(Deamidated)	1	1	QHD43416.1_S2_RBD	QHD43416.1_S2_RBD	1	4	0.1906	0	1	1	481.508	1923.01	1923.01	-0.15	-7e-05	ETD (Electron Transfer Dissociation)	MS2	26.0928	33.696	37.2449	9518	200428_Lumos_(LC1200)_nanoFlex_Ieva_SARS_CoV2_i1_Chy_Chymo_90min_ETD_HCD_2ul.raw	F11		8.76	FALSE	0	0.0003117	21566650	37.4
		TRUE	High	Sequest HT (A14)	Ambiguous	[L].HAPATVcGPKKSTnLVKN.[K]	C7(Carbamidomethyl); N14(Deamidated)	1	1	QHD43416.1_S2_RBD	QHD43416.1_S2_RBD	1	3	0.2874	0	1	1	641.675	1923.01	1923.01	-0.36	-0.00023	ETD (Electron Transfer Dissociation)	MS2	21.7415	69.368	37.2614	9522	200428_Lumos_(LC1200)_nanoFlex_Ieva_SARS_CoV2_i1_Chy_Chymo_90min_ETD_HCD_2ul.raw	F11		6.61	FALSE	0	0.001017	8624727	37.39
		TRUE	High	Sequest HT (A18)	Ambiguous	[L].HAPATVcGPKKSTnLVKN.[K]	C7(Carbamidomethyl); N14(Deamidated)	1	1	QHD43416.1_S2_RBD	QHD43416.1_S2_RBD	1	3	0.2027	0	1	1	641.675	1923.01	1923.01	-0.08	-5e-05	HCD (High Energy Collision Dissociation)	MS2	0	34.288	35.9917	9181	200428_Lumos_(LC1200)_nanoFlex_Ieva_SARS_CoV2_i1_Chy_Chymo_90min_ETD_HCD_2ul.raw	F11		5.23	FALSE	0	0.006578	19376600	36.17
		TRUE	Low	Sequest HT (A18)	Ambiguous	[L].HAPATVcGPKKSTnLVKN.[K]	C7(Carbamidomethyl); N14(Deamidated)	1	1	QHD43416.1_S2_RBD	QHD43416.1_S2_RBD	1	4	0.1467	0	1	1	481.509	1923.01	1923.01	0.49	0.00023	HCD (High Energy Collision Dissociation)	MS2	59.7052	10.926	36.0258	9191	200428_Lumos_(LC1200)_nanoFlex_Ieva_SARS_CoV2_i1_Chy_Chymo_90min_ETD_HCD_2ul.raw	F11		4.5	FALSE	0.2219	0.7759	38680016	36.16
		TRUE	High	Sequest HT (A18)	Ambiguous	[L].HAPATVcGPKKSTnLVKN.[K]	C7(Carbamidomethyl); N14(Deamidated)	1	1	QHD43416.1_S2_RBD	QHD43416.1_S2_RBD	1	2	0.2425	0	1	1	962.01	1923.01	1923.01	0.5	0.00048	HCD (High Energy Collision Dissociation)	MS2	0	54	36.2131	9245	200428_Lumos_(LC1200)_nanoFlex_Ieva_SARS_CoV2_i1_Chy_Chymo_90min_ETD_HCD_2ul.raw	F11		4.66	FALSE	0	0.0009771	1.6694e+06	36.18
		TRUE	High	Sequest HT (A18)	Ambiguous	[L].HAPATVcGPKKSTnLVKN.[K]	C7(Carbamidomethyl); N14(Deamidated)	1	1	QHD43416.1_S2_RBD	QHD43416.1_S2_RBD	1	3	0.259	0	1	1	641.676	1923.01	1923.01	0.68	0.00044	HCD (High Energy Collision Dissociation)	MS2	6.59199	38.891	36.3688	9284	200428_Lumos_(LC1200)_nanoFlex_Ieva_SARS_CoV2_i1_Chy_Chymo_90min_ETD_HCD_2ul.raw	F11		3.32	FALSE	0	0.03721	19376600	36.17
		TRUE	Low	Sequest HT (A18)	Ambiguous	[L].HAPATVcGPKKSTnLVKN.[K]	C7(Carbamidomethyl); N14(Deamidated)	1	1	QHD43416.1_S2_RBD	QHD43416.1_S2_RBD	1	4	0.0847	0	1	1	481.508	1923.01	1923.01	-0.21	-0.0001	HCD (High Energy Collision Dissociation)	MS2	40.0312	35.327	36.6733	9364	200428_Lumos_(LC1200)_nanoFlex_Ieva_SARS_CoV2_i1_Chy_Chymo_90min_ETD_HCD_2ul.raw	F11		3.66	FALSE	0.6978	1	6636593	36.87
		TRUE	High	Sequest HT (A18)	Ambiguous	[L].HAPATVcGPKKSTnLVKN.[K]	C7(Carbamidomethyl); N14(Deamidated)	1	1	QHD43416.1_S2_RBD	QHD43416.1_S2_RBD	1	3	0.2231	0	1	1	641.675	1923.01	1923.01	-0.65	-0.00042	HCD (High Energy Collision Dissociation)	MS2	31.174	39.386	36.8508	9410	200428_Lumos_(LC1200)_nanoFlex_Ieva_SARS_CoV2_i1_Chy_Chymo_90min_ETD_HCD_2ul.raw	F11		3.63	FALSE	0	0.0167	1.41681e+06	36.82
		TRUE	Low	Sequest HT (A18)	Ambiguous	[L].HAPATVcGPKKSTnLVKN.[K]	C7(Carbamidomethyl); N14(Deamidated)	1	1	QHD43416.1_S2_RBD	QHD43416.1_S2_RBD	1	4	0.1015	0	1	1	481.508	1923.01	1923.01	-0.15	-7e-05	HCD (High Energy Collision Dissociation)	MS2	26.0928	12.8	37.2569	9520	200428_Lumos_(LC1200)_nanoFlex_Ieva_SARS_CoV2_i1_Chy_Chymo_90min_ETD_HCD_2ul.raw	F11		3.94	FALSE	0.2015	0.7573	21566650	37.4
		TRUE	High	Sequest HT (A18)	Ambiguous	[L].HAPATVcGPKKSTnLVKN.[K]	C7(Carbamidomethyl); N14(Deamidated)	1	1	QHD43416.1_S2_RBD	QHD43416.1_S2_RBD	1	3	0.233	0	1	1	641.675	1923.01	1923.01	-0.36	-0.00023	HCD (High Energy Collision Dissociation)	MS2	21.7415	29.896	37.2712	9524	200428_Lumos_(LC1200)_nanoFlex_Ieva_SARS_CoV2_i1_Chy_Chymo_90min_ETD_HCD_2ul.raw	F11		3.52	FALSE	0.004512	0.2588	8624727	37.39
	TRUE	High	[L].HAPATVCGPKKSTNLVKNKCVNF.[N]	2xCarbamidomethyl [C7; C20]		FALSE	3.19854e-05	0	1	1	5	QHD43416.1_S2_RBD	QHD43416.1_S2_RBD [346-368]	1	2570.33	13206396		High	High	0	0.0001009	6.95	51.73
		Checked	Confidence	Identifying Node	PSM Ambiguity	Annotated Sequence	Modifications	# Protein Groups	# Proteins	Master Protein Accessions	Protein Accessions	# Missed Cleavages	Charge	DeltaScore	DeltaCn	Rank	Search Engine Rank	m/z [Da]	MH+ [Da]	Theo. MH+ [Da]	DeltaM [ppm]	Deltam/z [Da]	Activation Type	MS Order	Isolation Interference [%]	Ion Inject Time [ms]	RT [min]	First Scan	Spectrum File	File ID	Quan Info	XCorr	Contaminant	Percolator q-Value	Percolator PEP	Precursor Abundance	Apex RT [min]
		TRUE	High	Sequest HT (A2)	Unambiguous	[L].HAPATVcGPKKSTNLVKNKcVNF.[N]	C7(Carbamidomethyl); C20(Carbamidomethyl)	1	1	QHD43416.1_S2_RBD	QHD43416.1_S2_RBD	1	4	0.7554	0	1	1	643.339	2570.33	2570.33	0.34	0.00022	ETD (Electron Transfer Dissociation)	MS2	19.6117	10.564	51.7227	13642	200428_Lumos_(LC1200)_nanoFlex_Ieva_SARS_CoV2_i1_Chy_Chymo_90min_ETD_HCD_2ul.raw	F11		6.95	FALSE	0	0.0001009	9301710	51.73
		TRUE	High	Sequest HT (A2)	Unambiguous	[L].HAPATVcGPKKSTNLVKNKcVNF.[N]	C7(Carbamidomethyl); C20(Carbamidomethyl)	1	1	QHD43416.1_S2_RBD	QHD43416.1_S2_RBD	1	5	0.6972	0	1	1	514.872	2570.33	2570.33	0.03	1e-05	ETD (Electron Transfer Dissociation)	MS2	36.6031	17.31	51.8149	13668	200428_Lumos_(LC1200)_nanoFlex_Ieva_SARS_CoV2_i1_Chy_Chymo_90min_ETD_HCD_2ul.raw	F11		5.78	FALSE	0	0.00104	3904686	51.7
		TRUE	High	Sequest HT (A16)	Unambiguous	[L].HAPATVcGPKKSTNLVKNKcVNF.[N]	C7(Carbamidomethyl); C20(Carbamidomethyl)	1	1	QHD43416.1_S2_RBD	QHD43416.1_S2_RBD	1	4	0.5791	0	1	1	643.339	2570.33	2570.33	0.34	0.00022	HCD (High Energy Collision Dissociation)	MS2	19.6117	8.394	51.7347	13644	200428_Lumos_(LC1200)_nanoFlex_Ieva_SARS_CoV2_i1_Chy_Chymo_90min_ETD_HCD_2ul.raw	F11		4.3	FALSE	0	0.02399	9301710	51.73
		TRUE	Low	Sequest HT (A16)	Ambiguous	[L].HAPATVcGPKKSTNLVKNKcVNF.[N]	C7(Carbamidomethyl); C20(Carbamidomethyl)	1	1	QHD43416.1_S2_RBD	QHD43416.1_S2_RBD	1	5	0.2816	0	1	1	514.872	2570.33	2570.33	0.03	1e-05	HCD (High Energy Collision Dissociation)	MS2	36.6031	15.829	51.823	13670	200428_Lumos_(LC1200)_nanoFlex_Ieva_SARS_CoV2_i1_Chy_Chymo_90min_ETD_HCD_2ul.raw	F11		2.06	FALSE	0.8417	1	3904686	51.7
		TRUE	Low	Sequest HT (A18)	Ambiguous	[L].HAPATVcGPKKSTNLVKNKcVNF.[N]	C7(Carbamidomethyl); C20(Carbamidomethyl)	1	1	QHD43416.1_S2_RBD	QHD43416.1_S2_RBD	1	5	0.1748	0	1	1	514.872	2570.33	2570.33	0.03	1e-05	HCD (High Energy Collision Dissociation)	MS2	36.6031	15.829	51.823	13670	200428_Lumos_(LC1200)_nanoFlex_Ieva_SARS_CoV2_i1_Chy_Chymo_90min_ETD_HCD_2ul.raw	F11		2.06	FALSE	0.9722	1	3904686	51.7
	TRUE	High	[F].KCYGVSPTKL.[N]	1xCarbamidomethyl [C2]		FALSE	0.000695773	0	1	1	6	QHD43416.1_S2_RBD	QHD43416.1_S2_RBD [205-214]	1	1152.61	6.97965e+06		High	High	0	0.0008537	3.7	52.35
		Checked	Confidence	Identifying Node	PSM Ambiguity	Annotated Sequence	Modifications	# Protein Groups	# Proteins	Master Protein Accessions	Protein Accessions	# Missed Cleavages	Charge	DeltaScore	DeltaCn	Rank	Search Engine Rank	m/z [Da]	MH+ [Da]	Theo. MH+ [Da]	DeltaM [ppm]	Deltam/z [Da]	Activation Type	MS Order	Isolation Interference [%]	Ion Inject Time [ms]	RT [min]	First Scan	Spectrum File	File ID	Quan Info	XCorr	Contaminant	Percolator q-Value	Percolator PEP	Precursor Abundance	Apex RT [min]
		TRUE	High	Sequest HT (A2)	Unambiguous	[F].KcYGVSPTKL.[N]	C2(Carbamidomethyl)	1	1	QHD43416.1_S2_RBD	QHD43416.1_S2_RBD	1	2	0.475	0	1	1	576.808	1152.61	1152.61	0.57	0.00033	ETD (Electron Transfer Dissociation)	MS2	24.7109	14.676	52.3505	13818	200428_Lumos_(LC1200)_nanoFlex_Ieva_SARS_CoV2_i1_Chy_Chymo_90min_ETD_HCD_2ul.raw	F11		2	FALSE	0.0009067	0.177	4.14466e+06	52.35
		TRUE	Low	Sequest HT (A2)	Ambiguous	[F].KcYGVSPTKL.[N]	C2(Carbamidomethyl)	1	1	QHD43416.1_S2_RBD	QHD43416.1_S2_RBD	1	3	0.5523	0	1	1	384.874	1152.61	1152.61	0.48	0.00018	ETD (Electron Transfer Dissociation)	MS2	49.5753	38.856	52.3602	13821	200428_Lumos_(LC1200)_nanoFlex_Ieva_SARS_CoV2_i1_Chy_Chymo_90min_ETD_HCD_2ul.raw	F11		2.77	FALSE	0.1041	0.7621	2.83499e+06	52.32
		TRUE	High	Sequest HT (A14)	Ambiguous	[F].KcYGVSPTKL.[N]	C2(Carbamidomethyl)	1	1	QHD43416.1_S2_RBD	QHD43416.1_S2_RBD	1	3	0.4729	0	1	1	384.874	1152.61	1152.61	0.48	0.00018	ETD (Electron Transfer Dissociation)	MS2	49.5753	38.856	52.3602	13821	200428_Lumos_(LC1200)_nanoFlex_Ieva_SARS_CoV2_i1_Chy_Chymo_90min_ETD_HCD_2ul.raw	F11		2.77	FALSE	0.00612	0.2634	2.83499e+06	52.32
		TRUE	High	Sequest HT (A16)	Unambiguous	[F].KcYGVSPTKL.[N]	C2(Carbamidomethyl)	1	1	QHD43416.1_S2_RBD	QHD43416.1_S2_RBD	1	2	0.6216	0	1	1	576.808	1152.61	1152.61	0.57	0.00033	HCD (High Energy Collision Dissociation)	MS2	24.7109	10.466	52.3589	13820	200428_Lumos_(LC1200)_nanoFlex_Ieva_SARS_CoV2_i1_Chy_Chymo_90min_ETD_HCD_2ul.raw	F11		3.7	FALSE	0	0.0008537	4.14466e+06	52.35
		TRUE	Medium	Sequest HT (A16)	Ambiguous	[F].KcYGVSPTKL.[N]	C2(Carbamidomethyl)	1	1	QHD43416.1_S2_RBD	QHD43416.1_S2_RBD	1	3	0.6087	0	1	1	384.874	1152.61	1152.61	0.48	0.00018	HCD (High Energy Collision Dissociation)	MS2	49.5753	54	52.3706	13824	200428_Lumos_(LC1200)_nanoFlex_Ieva_SARS_CoV2_i1_Chy_Chymo_90min_ETD_HCD_2ul.raw	F11		2.99	FALSE	0.02518	0.4436	2.83499e+06	52.32
		TRUE	Low	Sequest HT (A18)	Ambiguous	[F].KcYGVSPTKL.[N]	C2(Carbamidomethyl)	1	1	QHD43416.1_S2_RBD	QHD43416.1_S2_RBD	1	3	0.4783	0	1	1	384.874	1152.61	1152.61	0.48	0.00018	HCD (High Energy Collision Dissociation)	MS2	49.5753	54	52.3706	13824	200428_Lumos_(LC1200)_nanoFlex_Ieva_SARS_CoV2_i1_Chy_Chymo_90min_ETD_HCD_2ul.raw	F11		2.99	FALSE	0.8158	1	2.83499e+06	52.32
	TRUE	High	[Y].KLPDDFTGCVIAW.[N]	1xCarbamidomethyl [C9]		FALSE	0.00945239	0	1	1	69	QHD43416.1_S2_RBD	QHD43416.1_S2_RBD [251-263]	2	1521.74	9.37408e+09		High	High	0	0.01263	3.61	109.28
		Checked	Confidence	Identifying Node	PSM Ambiguity	Annotated Sequence	Modifications	# Protein Groups	# Proteins	Master Protein Accessions	Protein Accessions	# Missed Cleavages	Charge	DeltaScore	DeltaCn	Rank	Search Engine Rank	m/z [Da]	MH+ [Da]	Theo. MH+ [Da]	DeltaM [ppm]	Deltam/z [Da]	Activation Type	MS Order	Isolation Interference [%]	Ion Inject Time [ms]	RT [min]	First Scan	Spectrum File	File ID	Quan Info	XCorr	Contaminant	Percolator q-Value	Percolator PEP	Precursor Abundance	Apex RT [min]
		TRUE	Low	Sequest HT (A2)	Ambiguous	[Y].KLPDDFTGcVIAW.[N]	C9(Carbamidomethyl)	1	1	QHD43416.1_S2_RBD	QHD43416.1_S2_RBD	2	2		0.0233	2	2	761.376	1521.74	1521.74	2.18	0.00166	ETD (Electron Transfer Dissociation)	MS2	0	10.872	109.237	31897	200428_Lumos_(LC1200)_nanoFlex_Ieva_SARS_CoV2_i1_Chy_Chymo_90min_ETD_HCD_2ul.raw	F11		0.42	FALSE	0.9582	1	9351586816	109.28
		TRUE	Low	Sequest HT (A2)	Ambiguous	[Y].KLPDDFTGcVIAW.[N]	C9(Carbamidomethyl)	1	1	QHD43416.1_S2_RBD	QHD43416.1_S2_RBD	2	2	0.3162	0	1	1	761.374	1521.74	1521.74	0.25	0.00019	ETD (Electron Transfer Dissociation)	MS2	24.2638	86	110.331	32279	200428_Lumos_(LC1200)_nanoFlex_Ieva_SARS_CoV2_i1_Chy_Chymo_90min_ETD_HCD_2ul.raw	F11		1.17	FALSE	0.06909	0.6893	20546442	111.26
		TRUE	High	Sequest HT (A2)	Unambiguous	[Y].KLPDDFTGcVIAW.[N]	C9(Carbamidomethyl)	1	1	QHD43416.1_S2_RBD	QHD43416.1_S2_RBD	2	2	0.6653	0	1	1	761.374	1521.74	1521.74	0.42	0.00032	ETD (Electron Transfer Dissociation)	MS2	3.89375	29.337	110.721	32399	200428_Lumos_(LC1200)_nanoFlex_Ieva_SARS_CoV2_i1_Chy_Chymo_90min_ETD_HCD_2ul.raw	F11		2.42	FALSE	0.0009067	0.158	20546442	111.26
		TRUE	High	Sequest HT (A2)	Unambiguous	[Y].KLPDDFTGcVIAW.[N]	C9(Carbamidomethyl)	1	1	QHD43416.1_S2_RBD	QHD43416.1_S2_RBD	2	2	0.6545	0	1	1	761.374	1521.74	1521.74	-0.07	-5e-05	ETD (Electron Transfer Dissociation)	MS2	2.57972	64.063	111.102	32510	200428_Lumos_(LC1200)_nanoFlex_Ieva_SARS_CoV2_i1_Chy_Chymo_90min_ETD_HCD_2ul.raw	F11		2.46	FALSE	0	0.02922	20546442	111.26
		TRUE	High	Sequest HT (A2)	Unambiguous	[Y].KLPDDFTGcVIAW.[N]	C9(Carbamidomethyl)	1	1	QHD43416.1_S2_RBD	QHD43416.1_S2_RBD	2	2	0.6233	0	1	1	761.374	1521.74	1521.74	-0.15	-0.00011	ETD (Electron Transfer Dissociation)	MS2	5.5167	86	111.493	32620	200428_Lumos_(LC1200)_nanoFlex_Ieva_SARS_CoV2_i1_Chy_Chymo_90min_ETD_HCD_2ul.raw	F11		2.23	FALSE	0	0.1413	20546442	111.26
		TRUE	High	Sequest HT (A2)	Unambiguous	[Y].KLPDDFTGcVIAW.[N]	C9(Carbamidomethyl)	1	1	QHD43416.1_S2_RBD	QHD43416.1_S2_RBD	2	2	0.5523	0	1	1	761.374	1521.74	1521.74	0.25	0.00019	ETD (Electron Transfer Dissociation)	MS2	3.39153	86	111.876	32730	200428_Lumos_(LC1200)_nanoFlex_Ieva_SARS_CoV2_i1_Chy_Chymo_90min_ETD_HCD_2ul.raw	F11		1.72	FALSE	0	0.09335	1.7474e+06	112.08
		TRUE	High	Sequest HT (A2)	Unambiguous	[Y].KLPDDFTGcVIAW.[N]	C9(Carbamidomethyl)	1	1	QHD43416.1_S2_RBD	QHD43416.1_S2_RBD	2	2	0.4859	0	1	1	761.374	1521.74	1521.74	-0.15	-0.00011	ETD (Electron Transfer Dissociation)	MS2	17.6134	86	112.275	32848	200428_Lumos_(LC1200)_nanoFlex_Ieva_SARS_CoV2_i1_Chy_Chymo_90min_ETD_HCD_2ul.raw	F11		1.77	FALSE	0.001755	0.2198	1.7474e+06	112.08
		TRUE	High	Sequest HT (A2)	Unambiguous	[Y].KLPDDFTGcVIAW.[N]	C9(Carbamidomethyl)	1	1	QHD43416.1_S2_RBD	QHD43416.1_S2_RBD	2	2	0.3977	0	1	1	761.374	1521.74	1521.74	0.25	0.00019	ETD (Electron Transfer Dissociation)	MS2	8.88991	86	112.684	32972	200428_Lumos_(LC1200)_nanoFlex_Ieva_SARS_CoV2_i1_Chy_Chymo_90min_ETD_HCD_2ul.raw	F11		1.71	FALSE	0	0.0786	1.7474e+06	112.08
		TRUE	High	Sequest HT (A2)	Unambiguous	[Y].KLPDDFTGcVIAW.[N]	C9(Carbamidomethyl)	1	1	QHD43416.1_S2_RBD	QHD43416.1_S2_RBD	2	2	0.5092	0	1	1	761.374	1521.74	1521.74	0.42	0.00032	ETD (Electron Transfer Dissociation)	MS2	27.2509	86	113.075	33093	200428_Lumos_(LC1200)_nanoFlex_Ieva_SARS_CoV2_i1_Chy_Chymo_90min_ETD_HCD_2ul.raw	F11		1.63	FALSE	0.001755	0.2454	61955	113.72
		TRUE	High	Sequest HT (A2)	Unambiguous	[Y].KLPDDFTGcVIAW.[N]	C9(Carbamidomethyl)	1	1	QHD43416.1_S2_RBD	QHD43416.1_S2_RBD	2	2	0.5328	0	1	1	761.374	1521.74	1521.74	0.09	7e-05	ETD (Electron Transfer Dissociation)	MS2	10.0416	86	113.458	33207	200428_Lumos_(LC1200)_nanoFlex_Ieva_SARS_CoV2_i1_Chy_Chymo_90min_ETD_HCD_2ul.raw	F11		1.37	FALSE	0	0.1458	61955	113.72
		TRUE	High	Sequest HT (A2)	Unambiguous	[Y].KLPDDFTGcVIAW.[N]	C9(Carbamidomethyl)	1	1	QHD43416.1_S2_RBD	QHD43416.1_S2_RBD	2	2	0.3973	0	1	1	761.374	1521.74	1521.74	0.01	1e-05	ETD (Electron Transfer Dissociation)	MS2	8.67955	86	113.84	33323	200428_Lumos_(LC1200)_nanoFlex_Ieva_SARS_CoV2_i1_Chy_Chymo_90min_ETD_HCD_2ul.raw	F11		1.46	FALSE	0.002538	0.2925	61955	113.72
		TRUE	High	Sequest HT (A2)	Unambiguous	[Y].KLPDDFTGcVIAW.[N]	C9(Carbamidomethyl)	1	1	QHD43416.1_S2_RBD	QHD43416.1_S2_RBD	2	2	0.4887	0	1	1	761.374	1521.74	1521.74	0.42	0.00032	ETD (Electron Transfer Dissociation)	MS2	4.15703	86	114.218	33440	200428_Lumos_(LC1200)_nanoFlex_Ieva_SARS_CoV2_i1_Chy_Chymo_90min_ETD_HCD_2ul.raw	F11		1.33	FALSE	0.001755	0.256	61955	113.72
		TRUE	Medium	Sequest HT (A2)	Ambiguous	[Y].KLPDDFTGcVIAW.[N]	C9(Carbamidomethyl)	1	1	QHD43416.1_S2_RBD	QHD43416.1_S2_RBD	2	2	0.5503	0	1	1	761.374	1521.74	1521.74	0.17	0.00013	ETD (Electron Transfer Dissociation)	MS2	14.3675	86	114.597	33559	200428_Lumos_(LC1200)_nanoFlex_Ieva_SARS_CoV2_i1_Chy_Chymo_90min_ETD_HCD_2ul.raw	F11		1.69	FALSE	0.0153	0.476
		TRUE	High	Sequest HT (A2)	Unambiguous	[Y].KLPDDFTGcVIAW.[N]	C9(Carbamidomethyl)	1	1	QHD43416.1_S2_RBD	QHD43416.1_S2_RBD	2	2	0.5658	0	1	1	761.374	1521.74	1521.74	0.42	0.00032	ETD (Electron Transfer Dissociation)	MS2	4.11548	86	114.967	33678	200428_Lumos_(LC1200)_nanoFlex_Ieva_SARS_CoV2_i1_Chy_Chymo_90min_ETD_HCD_2ul.raw	F11		1.52	FALSE	0	0.09318
		TRUE	High	Sequest HT (A2)	Unambiguous	[Y].KLPDDFTGcVIAW.[N]	C9(Carbamidomethyl)	1	1	QHD43416.1_S2_RBD	QHD43416.1_S2_RBD	2	2	0.5274	0	1	1	761.374	1521.74	1521.74	0.5	0.00038	ETD (Electron Transfer Dissociation)	MS2	7.73898	86	115.357	33803	200428_Lumos_(LC1200)_nanoFlex_Ieva_SARS_CoV2_i1_Chy_Chymo_90min_ETD_HCD_2ul.raw	F11		1.46	FALSE	0.0009067	0.1767
		TRUE	High	Sequest HT (A2)	Unambiguous	[Y].KLPDDFTGcVIAW.[N]	C9(Carbamidomethyl)	1	1	QHD43416.1_S2_RBD	QHD43416.1_S2_RBD	2	2	0.5245	0	1	1	761.374	1521.74	1521.74	0.33	0.00025	ETD (Electron Transfer Dissociation)	MS2	17.5523	86	115.724	33918	200428_Lumos_(LC1200)_nanoFlex_Ieva_SARS_CoV2_i1_Chy_Chymo_90min_ETD_HCD_2ul.raw	F11		1.43	FALSE	0.001755	0.2467
		TRUE	High	Sequest HT (A2)	Unambiguous	[Y].KLPDDFTGcVIAW.[N]	C9(Carbamidomethyl)	1	1	QHD43416.1_S2_RBD	QHD43416.1_S2_RBD	2	2	0.4762	0	1	1	761.374	1521.74	1521.74	0.66	0.0005	ETD (Electron Transfer Dissociation)	MS2	10.5169	86	116.096	34031	200428_Lumos_(LC1200)_nanoFlex_Ieva_SARS_CoV2_i1_Chy_Chymo_90min_ETD_HCD_2ul.raw	F11		1.26	FALSE	0.001755	0.2558	590836	116.46
		TRUE	High	Sequest HT (A2)	Unambiguous	[Y].KLPDDFTGcVIAW.[N]	C9(Carbamidomethyl)	1	1	QHD43416.1_S2_RBD	QHD43416.1_S2_RBD	2	2	0.4317	0	1	1	761.374	1521.74	1521.74	0.01	1e-05	ETD (Electron Transfer Dissociation)	MS2	69.3343	86	116.561	34167	200428_Lumos_(LC1200)_nanoFlex_Ieva_SARS_CoV2_i1_Chy_Chymo_90min_ETD_HCD_2ul.raw	F11		1.39	FALSE	0.002538	0.2907	590836	116.46
		TRUE	Low	Sequest HT (A2)	Ambiguous	[Y].KLPDDFTGcVIAW.[N]	C9(Carbamidomethyl)	1	1	QHD43416.1_S2_RBD	QHD43416.1_S2_RBD	2	2	0.3826	0	1	1	761.375	1521.74	1521.74	1.46	0.00111	ETD (Electron Transfer Dissociation)	MS2	17.7012	86	117.067	34317	200428_Lumos_(LC1200)_nanoFlex_Ieva_SARS_CoV2_i1_Chy_Chymo_90min_ETD_HCD_2ul.raw	F11		1.15	FALSE	0.06909	0.6869
		TRUE	High	Sequest HT (A2)	Unambiguous	[Y].KLPDDFTGcVIAW.[N]	C9(Carbamidomethyl)	1	1	QHD43416.1_S2_RBD	QHD43416.1_S2_RBD	2	2	0.2971	0	1	1	761.374	1521.74	1521.74	-0.07	-5e-05	ETD (Electron Transfer Dissociation)	MS2	21.1401	86	117.439	34436	200428_Lumos_(LC1200)_nanoFlex_Ieva_SARS_CoV2_i1_Chy_Chymo_90min_ETD_HCD_2ul.raw	F11		1.38	FALSE	0.002538	0.3396	62646.7	117.81
		TRUE	High	Sequest HT (A2)	Unambiguous	[Y].KLPDDFTGcVIAW.[N]	C9(Carbamidomethyl)	1	1	QHD43416.1_S2_RBD	QHD43416.1_S2_RBD	2	2	0.5414	0	1	1	761.375	1521.74	1521.74	0.82	0.00062	ETD (Electron Transfer Dissociation)	MS2	7.85794	86	117.818	34557	200428_Lumos_(LC1200)_nanoFlex_Ieva_SARS_CoV2_i1_Chy_Chymo_90min_ETD_HCD_2ul.raw	F11		1.57	FALSE	0	0.131	76199	118.17
		TRUE	Medium	Sequest HT (A2)	Ambiguous	[Y].KLPDDFTGcVIAW.[N]	C9(Carbamidomethyl)	1	1	QHD43416.1_S2_RBD	QHD43416.1_S2_RBD	2	2	0.3945	0	1	1	761.374	1521.74	1521.74	0.66	0.0005	ETD (Electron Transfer Dissociation)	MS2	6.65358	86	118.166	34667	200428_Lumos_(LC1200)_nanoFlex_Ieva_SARS_CoV2_i1_Chy_Chymo_90min_ETD_HCD_2ul.raw	F11		1.09	FALSE	0.02139	0.5304	76199	118.17
		TRUE	High	Sequest HT (A2)	Unambiguous	[Y].KLPDDFTGcVIAW.[N]	C9(Carbamidomethyl)	1	1	QHD43416.1_S2_RBD	QHD43416.1_S2_RBD	2	2	0.5182	0	1	1	761.374	1521.74	1521.74	0.33	0.00025	ETD (Electron Transfer Dissociation)	MS2	0	86	118.516	34780	200428_Lumos_(LC1200)_nanoFlex_Ieva_SARS_CoV2_i1_Chy_Chymo_90min_ETD_HCD_2ul.raw	F11		1.37	FALSE	0.002538	0.317	76199	118.17
		TRUE	Medium	Sequest HT (A2)	Ambiguous	[Y].KLPDDFTGcVIAW.[N]	C9(Carbamidomethyl)	1	1	QHD43416.1_S2_RBD	QHD43416.1_S2_RBD	2	2	0.3565	0	1	1	761.374	1521.74	1521.74	0.17	0.00013	ETD (Electron Transfer Dissociation)	MS2	12.8515	86	118.888	34897	200428_Lumos_(LC1200)_nanoFlex_Ieva_SARS_CoV2_i1_Chy_Chymo_90min_ETD_HCD_2ul.raw	F11		1.15	FALSE	0.0153	0.4684
		TRUE	Medium	Sequest HT (A2)	Ambiguous	[Y].KLPDDFTGcVIAW.[N]	C9(Carbamidomethyl)	1	1	QHD43416.1_S2_RBD	QHD43416.1_S2_RBD	2	2	0.383	0	1	1	761.374	1521.74	1521.74	0.17	0.00013	ETD (Electron Transfer Dissociation)	MS2	4.24387	86	119.231	35004	200428_Lumos_(LC1200)_nanoFlex_Ieva_SARS_CoV2_i1_Chy_Chymo_90min_ETD_HCD_2ul.raw	F11		0.94	FALSE	0.0361	0.5694
		TRUE	Low	Sequest HT (A2)	Ambiguous	[Y].KLPDDFTGcVIAW.[N]	C9(Carbamidomethyl)	1	1	QHD43416.1_S2_RBD	QHD43416.1_S2_RBD	2	2	0.3486	0	1	1	761.374	1521.74	1521.74	-0.07	-5e-05	ETD (Electron Transfer Dissociation)	MS2	50.4635	86	119.594	35115	200428_Lumos_(LC1200)_nanoFlex_Ieva_SARS_CoV2_i1_Chy_Chymo_90min_ETD_HCD_2ul.raw	F11		1.09	FALSE	0.1053	0.7688
		TRUE	High	Sequest HT (A2)	Unambiguous	[Y].KLPDDFTGcVIAW.[N]	C9(Carbamidomethyl)	1	1	QHD43416.1_S2_RBD	QHD43416.1_S2_RBD	2	2	0.4762	0	1	1	761.375	1521.74	1521.74	1.06	0.0008	ETD (Electron Transfer Dissociation)	MS2	16.3246	86	119.95	35219	200428_Lumos_(LC1200)_nanoFlex_Ieva_SARS_CoV2_i1_Chy_Chymo_90min_ETD_HCD_2ul.raw	F11		1.26	FALSE	0.002538	0.2936
		TRUE	Low	Sequest HT (A14)	Ambiguous	[Y].KLPDDFTGcVIAW.[N]	C9(Carbamidomethyl)	1	1	QHD43416.1_S2_RBD	QHD43416.1_S2_RBD	2	2	0.1368	0	1	1	761.374	1521.74	1521.74	0.25	0.00019	ETD (Electron Transfer Dissociation)	MS2	24.2638	86	110.331	32279	200428_Lumos_(LC1200)_nanoFlex_Ieva_SARS_CoV2_i1_Chy_Chymo_90min_ETD_HCD_2ul.raw	F11		1.17	FALSE	0.5712	0.9486	20546442	111.26
		TRUE	Low	Sequest HT (A14)	Ambiguous	[Y].KLPDDFTGcVIAW.[N]	C9(Carbamidomethyl)	1	1	QHD43416.1_S2_RBD	QHD43416.1_S2_RBD	2	2	0.4497	0	1	1	761.374	1521.74	1521.74	0.17	0.00013	ETD (Electron Transfer Dissociation)	MS2	14.3675	86	114.597	33559	200428_Lumos_(LC1200)_nanoFlex_Ieva_SARS_CoV2_i1_Chy_Chymo_90min_ETD_HCD_2ul.raw	F11		1.69	FALSE	0.4581	0.8876
		TRUE	Low	Sequest HT (A14)	Ambiguous	[Y].KLPDDFTGcVIAW.[N]	C9(Carbamidomethyl)	1	1	QHD43416.1_S2_RBD	QHD43416.1_S2_RBD	2	2	0.1652	0	1	1	761.375	1521.74	1521.74	1.46	0.00111	ETD (Electron Transfer Dissociation)	MS2	17.7012	86	117.067	34317	200428_Lumos_(LC1200)_nanoFlex_Ieva_SARS_CoV2_i1_Chy_Chymo_90min_ETD_HCD_2ul.raw	F11		1.15	FALSE	0.5255	0.9267
		TRUE	Low	Sequest HT (A14)	Ambiguous	[Y].KLPDDFTGcVIAW.[N]	C9(Carbamidomethyl)	1	1	QHD43416.1_S2_RBD	QHD43416.1_S2_RBD	2	2	0.1835	0	1	1	761.374	1521.74	1521.74	0.66	0.0005	ETD (Electron Transfer Dissociation)	MS2	6.65358	86	118.166	34667	200428_Lumos_(LC1200)_nanoFlex_Ieva_SARS_CoV2_i1_Chy_Chymo_90min_ETD_HCD_2ul.raw	F11		1.09	FALSE	0.05805	0.4645	76199	118.17
		TRUE	Medium	Sequest HT (A14)	Ambiguous	[Y].KLPDDFTGcVIAW.[N]	C9(Carbamidomethyl)	1	1	QHD43416.1_S2_RBD	QHD43416.1_S2_RBD	2	2	0.2957	0	1	1	761.374	1521.74	1521.74	0.17	0.00013	ETD (Electron Transfer Dissociation)	MS2	12.8515	86	118.888	34897	200428_Lumos_(LC1200)_nanoFlex_Ieva_SARS_CoV2_i1_Chy_Chymo_90min_ETD_HCD_2ul.raw	F11		1.15	FALSE	0.03311	0.3929
		TRUE	Low	Sequest HT (A14)	Ambiguous	[Y].KLPDDFTGcVIAW.[N]	C9(Carbamidomethyl)	1	1	QHD43416.1_S2_RBD	QHD43416.1_S2_RBD	2	2	0.2021	0	1	1	761.374	1521.74	1521.74	0.17	0.00013	ETD (Electron Transfer Dissociation)	MS2	4.24387	86	119.231	35004	200428_Lumos_(LC1200)_nanoFlex_Ieva_SARS_CoV2_i1_Chy_Chymo_90min_ETD_HCD_2ul.raw	F11		0.94	FALSE	0.3826	0.8381
		TRUE	Low	Sequest HT (A14)	Ambiguous	[Y].KLPDDFTGcVIAW.[N]	C9(Carbamidomethyl)	1	1	QHD43416.1_S2_RBD	QHD43416.1_S2_RBD	2	2	0.0092	0	1	1	761.374	1521.74	1521.74	-0.07	-5e-05	ETD (Electron Transfer Dissociation)	MS2	50.4635	86	119.594	35115	200428_Lumos_(LC1200)_nanoFlex_Ieva_SARS_CoV2_i1_Chy_Chymo_90min_ETD_HCD_2ul.raw	F11		1.09	FALSE	0.8541	1
		TRUE	High	Sequest HT (A16)	Unambiguous	[Y].KLPDDFTGcVIAW.[N]	C9(Carbamidomethyl)	1	1	QHD43416.1_S2_RBD	QHD43416.1_S2_RBD	2	2	0.6537	0	1	1	761.376	1521.74	1521.74	2.18	0.00166	HCD (High Energy Collision Dissociation)	MS2	0	0.044	109.247	31900	200428_Lumos_(LC1200)_nanoFlex_Ieva_SARS_CoV2_i1_Chy_Chymo_90min_ETD_HCD_2ul.raw	F11		3.61	FALSE	0	0.01263	9351586816	109.28
		TRUE	High	Sequest HT (A16)	Unambiguous	[Y].KLPDDFTGcVIAW.[N]	C9(Carbamidomethyl)	1	1	QHD43416.1_S2_RBD	QHD43416.1_S2_RBD	2	2	0.6021	0	1	1	761.374	1521.74	1521.74	0.25	0.00019	HCD (High Energy Collision Dissociation)	MS2	24.2638	36.079	110.344	32282	200428_Lumos_(LC1200)_nanoFlex_Ieva_SARS_CoV2_i1_Chy_Chymo_90min_ETD_HCD_2ul.raw	F11		2.84	FALSE	0	0.03121	20546442	111.26
		TRUE	High	Sequest HT (A16)	Unambiguous	[Y].KLPDDFTGcVIAW.[N]	C9(Carbamidomethyl)	1	1	QHD43416.1_S2_RBD	QHD43416.1_S2_RBD	2	2	0.5181	0	1	1	761.374	1521.74	1521.74	0.42	0.00032	HCD (High Energy Collision Dissociation)	MS2	3.89375	41.338	110.732	32401	200428_Lumos_(LC1200)_nanoFlex_Ieva_SARS_CoV2_i1_Chy_Chymo_90min_ETD_HCD_2ul.raw	F11		3.32	FALSE	0	0.02347	20546442	111.26
		TRUE	High	Sequest HT (A16)	Unambiguous	[Y].KLPDDFTGcVIAW.[N]	C9(Carbamidomethyl)	1	1	QHD43416.1_S2_RBD	QHD43416.1_S2_RBD	2	2	0.6522	0	1	1	761.374	1521.74	1521.74	-0.07	-5e-05	HCD (High Energy Collision Dissociation)	MS2	2.57972	54	111.11	32512	200428_Lumos_(LC1200)_nanoFlex_Ieva_SARS_CoV2_i1_Chy_Chymo_90min_ETD_HCD_2ul.raw	F11		3.45	FALSE	0	0.03122	20546442	111.26
		TRUE	High	Sequest HT (A16)	Unambiguous	[Y].KLPDDFTGcVIAW.[N]	C9(Carbamidomethyl)	1	1	QHD43416.1_S2_RBD	QHD43416.1_S2_RBD	2	2	0.6184	0	1	1	761.374	1521.74	1521.74	-0.15	-0.00011	HCD (High Energy Collision Dissociation)	MS2	5.5167	54	111.503	32622	200428_Lumos_(LC1200)_nanoFlex_Ieva_SARS_CoV2_i1_Chy_Chymo_90min_ETD_HCD_2ul.raw	F11		3.59	FALSE	0	0.01883	20546442	111.26
		TRUE	High	Sequest HT (A16)	Unambiguous	[Y].KLPDDFTGcVIAW.[N]	C9(Carbamidomethyl)	1	1	QHD43416.1_S2_RBD	QHD43416.1_S2_RBD	2	2	0.5475	0	1	1	761.374	1521.74	1521.74	0.25	0.00019	HCD (High Energy Collision Dissociation)	MS2	3.39153	54	111.889	32733	200428_Lumos_(LC1200)_nanoFlex_Ieva_SARS_CoV2_i1_Chy_Chymo_90min_ETD_HCD_2ul.raw	F11		2.21	FALSE	0	0.04725	1.7474e+06	112.08
		TRUE	High	Sequest HT (A16)	Unambiguous	[Y].KLPDDFTGcVIAW.[N]	C9(Carbamidomethyl)	1	1	QHD43416.1_S2_RBD	QHD43416.1_S2_RBD	2	2	0.5388	0	1	1	761.374	1521.74	1521.74	-0.15	-0.00011	HCD (High Energy Collision Dissociation)	MS2	17.6134	54	112.287	32850	200428_Lumos_(LC1200)_nanoFlex_Ieva_SARS_CoV2_i1_Chy_Chymo_90min_ETD_HCD_2ul.raw	F11		2.19	FALSE	0	0.06016	1.7474e+06	112.08
		TRUE	High	Sequest HT (A16)	Unambiguous	[Y].KLPDDFTGcVIAW.[N]	C9(Carbamidomethyl)	1	1	QHD43416.1_S2_RBD	QHD43416.1_S2_RBD	2	2	0.4408	0	1	1	761.374	1521.74	1521.74	0.25	0.00019	HCD (High Energy Collision Dissociation)	MS2	8.88991	54	112.695	32975	200428_Lumos_(LC1200)_nanoFlex_Ieva_SARS_CoV2_i1_Chy_Chymo_90min_ETD_HCD_2ul.raw	F11		2.11	FALSE	0	0.05787	1.7474e+06	112.08
		TRUE	High	Sequest HT (A16)	Unambiguous	[Y].KLPDDFTGcVIAW.[N]	C9(Carbamidomethyl)	1	1	QHD43416.1_S2_RBD	QHD43416.1_S2_RBD	2	2	0.441	0	1	1	761.374	1521.74	1521.74	0.42	0.00032	HCD (High Energy Collision Dissociation)	MS2	27.2509	54	113.087	33095	200428_Lumos_(LC1200)_nanoFlex_Ieva_SARS_CoV2_i1_Chy_Chymo_90min_ETD_HCD_2ul.raw	F11		1.61	FALSE	0	0.06901	61955	113.72
		TRUE	High	Sequest HT (A16)	Unambiguous	[Y].KLPDDFTGcVIAW.[N]	C9(Carbamidomethyl)	1	1	QHD43416.1_S2_RBD	QHD43416.1_S2_RBD	2	2	0.5821	0	1	1	761.374	1521.74	1521.74	0.09	7e-05	HCD (High Energy Collision Dissociation)	MS2	10.0416	54	113.471	33210	200428_Lumos_(LC1200)_nanoFlex_Ieva_SARS_CoV2_i1_Chy_Chymo_90min_ETD_HCD_2ul.raw	F11		2.01	FALSE	0.0009362	0.1601	61955	113.72
		TRUE	High	Sequest HT (A16)	Unambiguous	[Y].KLPDDFTGcVIAW.[N]	C9(Carbamidomethyl)	1	1	QHD43416.1_S2_RBD	QHD43416.1_S2_RBD	2	2	0.5034	0	1	1	761.374	1521.74	1521.74	0.01	1e-05	HCD (High Energy Collision Dissociation)	MS2	8.67955	54	113.851	33325	200428_Lumos_(LC1200)_nanoFlex_Ieva_SARS_CoV2_i1_Chy_Chymo_90min_ETD_HCD_2ul.raw	F11		1.49	FALSE	0.00437	0.2569	61955	113.72
		TRUE	High	Sequest HT (A16)	Unambiguous	[Y].KLPDDFTGcVIAW.[N]	C9(Carbamidomethyl)	1	1	QHD43416.1_S2_RBD	QHD43416.1_S2_RBD	2	2	0.5203	0	1	1	761.374	1521.74	1521.74	0.42	0.00032	HCD (High Energy Collision Dissociation)	MS2	4.15703	54	114.226	33442	200428_Lumos_(LC1200)_nanoFlex_Ieva_SARS_CoV2_i1_Chy_Chymo_90min_ETD_HCD_2ul.raw	F11		1.48	FALSE	0.003547	0.2254	61955	113.72
		TRUE	High	Sequest HT (A16)	Unambiguous	[Y].KLPDDFTGcVIAW.[N]	C9(Carbamidomethyl)	1	1	QHD43416.1_S2_RBD	QHD43416.1_S2_RBD	2	2	0.6522	0	1	1	761.374	1521.74	1521.74	0.17	0.00013	HCD (High Energy Collision Dissociation)	MS2	14.3675	54	114.609	33562	200428_Lumos_(LC1200)_nanoFlex_Ieva_SARS_CoV2_i1_Chy_Chymo_90min_ETD_HCD_2ul.raw	F11		1.84	FALSE	0.0009362	0.151
		TRUE	High	Sequest HT (A16)	Unambiguous	[Y].KLPDDFTGcVIAW.[N]	C9(Carbamidomethyl)	1	1	QHD43416.1_S2_RBD	QHD43416.1_S2_RBD	2	2	0.5266	0	1	1	761.374	1521.74	1521.74	0.42	0.00032	HCD (High Energy Collision Dissociation)	MS2	4.11548	54	114.978	33681	200428_Lumos_(LC1200)_nanoFlex_Ieva_SARS_CoV2_i1_Chy_Chymo_90min_ETD_HCD_2ul.raw	F11		1.69	FALSE	0.003547	0.24
		TRUE	High	Sequest HT (A16)	Unambiguous	[Y].KLPDDFTGcVIAW.[N]	C9(Carbamidomethyl)	1	1	QHD43416.1_S2_RBD	QHD43416.1_S2_RBD	2	2	0.4	0	1	1	761.374	1521.74	1521.74	0.5	0.00038	HCD (High Energy Collision Dissociation)	MS2	7.73898	54	115.37	33806	200428_Lumos_(LC1200)_nanoFlex_Ieva_SARS_CoV2_i1_Chy_Chymo_90min_ETD_HCD_2ul.raw	F11		1.35	FALSE	0.002712	0.2127
		TRUE	High	Sequest HT (A16)	Unambiguous	[Y].KLPDDFTGcVIAW.[N]	C9(Carbamidomethyl)	1	1	QHD43416.1_S2_RBD	QHD43416.1_S2_RBD	2	2	0.4143	0	1	1	761.374	1521.74	1521.74	0.33	0.00025	HCD (High Energy Collision Dissociation)	MS2	17.5523	54	115.737	33921	200428_Lumos_(LC1200)_nanoFlex_Ieva_SARS_CoV2_i1_Chy_Chymo_90min_ETD_HCD_2ul.raw	F11		1.4	FALSE	0.006856	0.3094
		TRUE	Medium	Sequest HT (A16)	Ambiguous	[Y].KLPDDFTGcVIAW.[N]	C9(Carbamidomethyl)	1	1	QHD43416.1_S2_RBD	QHD43416.1_S2_RBD	2	2	0.5349	0	1	1	761.374	1521.74	1521.74	0.66	0.0005	HCD (High Energy Collision Dissociation)	MS2	10.5169	54	116.105	34033	200428_Lumos_(LC1200)_nanoFlex_Ieva_SARS_CoV2_i1_Chy_Chymo_90min_ETD_HCD_2ul.raw	F11		1.29	FALSE	0.01584	0.3928
		TRUE	Low	Sequest HT (A16)	Ambiguous	[Y].KLPDDFTGcVIAW.[N]	C9(Carbamidomethyl)	1	1	QHD43416.1_S2_RBD	QHD43416.1_S2_RBD	2	2	0.2895	0	1	1	761.374	1521.74	1521.74	0.01	1e-05	HCD (High Energy Collision Dissociation)	MS2	69.3343	54	116.569	34168	200428_Lumos_(LC1200)_nanoFlex_Ieva_SARS_CoV2_i1_Chy_Chymo_90min_ETD_HCD_2ul.raw	F11		1.14	FALSE	0.2508	0.8482
		TRUE	Medium	Sequest HT (A16)	Ambiguous	[Y].KLPDDFTGcVIAW.[N]	C9(Carbamidomethyl)	1	1	QHD43416.1_S2_RBD	QHD43416.1_S2_RBD	2	2	0.3303	0	1	1	761.375	1521.74	1521.74	1.46	0.00111	HCD (High Energy Collision Dissociation)	MS2	17.7012	54	117.075	34319	200428_Lumos_(LC1200)_nanoFlex_Ieva_SARS_CoV2_i1_Chy_Chymo_90min_ETD_HCD_2ul.raw	F11		1.09	FALSE	0.0372	0.4914
		TRUE	High	Sequest HT (A16)	Unambiguous	[Y].KLPDDFTGcVIAW.[N]	C9(Carbamidomethyl)	1	1	QHD43416.1_S2_RBD	QHD43416.1_S2_RBD	2	2	0.6716	0	1	1	761.374	1521.74	1521.74	-0.07	-5e-05	HCD (High Energy Collision Dissociation)	MS2	21.1401	54	117.447	34438	200428_Lumos_(LC1200)_nanoFlex_Ieva_SARS_CoV2_i1_Chy_Chymo_90min_ETD_HCD_2ul.raw	F11		2.01	FALSE	0.0009362	0.09601	62646.7	117.81
		TRUE	High	Sequest HT (A16)	Unambiguous	[Y].KLPDDFTGcVIAW.[N]	C9(Carbamidomethyl)	1	1	QHD43416.1_S2_RBD	QHD43416.1_S2_RBD	2	2	0.3065	0	1	1	761.375	1521.74	1521.74	0.82	0.00062	HCD (High Energy Collision Dissociation)	MS2	7.85794	54	117.826	34559	200428_Lumos_(LC1200)_nanoFlex_Ieva_SARS_CoV2_i1_Chy_Chymo_90min_ETD_HCD_2ul.raw	F11		1.24	FALSE	0.006856	0.3116	76199	118.17
		TRUE	Low	Sequest HT (A16)	Ambiguous	[Y].KLPDDFTGcVIAW.[N]	C9(Carbamidomethyl)	1	1	QHD43416.1_S2_RBD	QHD43416.1_S2_RBD	2	2	0.4715	0	1	1	761.374	1521.74	1521.74	0.66	0.0005	HCD (High Energy Collision Dissociation)	MS2	6.65358	54	118.175	34668	200428_Lumos_(LC1200)_nanoFlex_Ieva_SARS_CoV2_i1_Chy_Chymo_90min_ETD_HCD_2ul.raw	F11		1.23	FALSE	0.1054	0.6935	76199	118.17
		TRUE	Low	Sequest HT (A16)	Ambiguous	[Y].KLPDDFTGcVIAW.[N]	C9(Carbamidomethyl)	1	1	QHD43416.1_S2_RBD	QHD43416.1_S2_RBD	2	2	0.4724	0	1	1	761.374	1521.74	1521.74	0.33	0.00025	HCD (High Energy Collision Dissociation)	MS2	0	54	118.527	34782	200428_Lumos_(LC1200)_nanoFlex_Ieva_SARS_CoV2_i1_Chy_Chymo_90min_ETD_HCD_2ul.raw	F11		1.27	FALSE	0.05963	0.6089	76199	118.17
		TRUE	Low	Sequest HT (A16)	Ambiguous	[Y].KLPDDFTGcVIAW.[N]	C9(Carbamidomethyl)	1	1	QHD43416.1_S2_RBD	QHD43416.1_S2_RBD	2	2	0.1875	0	1	1	761.374	1521.74	1521.74	0.17	0.00013	HCD (High Energy Collision Dissociation)	MS2	12.8515	54	118.899	34899	200428_Lumos_(LC1200)_nanoFlex_Ieva_SARS_CoV2_i1_Chy_Chymo_90min_ETD_HCD_2ul.raw	F11		0.96	FALSE	0.06728	0.6289
		TRUE	High	Sequest HT (A16)	Unambiguous	[Y].KLPDDFTGcVIAW.[N]	C9(Carbamidomethyl)	1	1	QHD43416.1_S2_RBD	QHD43416.1_S2_RBD	2	2	0.6111	0	1	1	761.374	1521.74	1521.74	0.17	0.00013	HCD (High Energy Collision Dissociation)	MS2	4.24387	54	119.241	35006	200428_Lumos_(LC1200)_nanoFlex_Ieva_SARS_CoV2_i1_Chy_Chymo_90min_ETD_HCD_2ul.raw	F11		1.44	FALSE	0.002712	0.1995
		TRUE	Low	Sequest HT (A16)	Ambiguous	[Y].KLPDDFTGcVIAW.[N]	C9(Carbamidomethyl)	1	1	QHD43416.1_S2_RBD	QHD43416.1_S2_RBD	2	2	0.4531	0	1	1	761.374	1521.74	1521.74	-0.07	-5e-05	HCD (High Energy Collision Dissociation)	MS2	50.4635	54	119.603	35116	200428_Lumos_(LC1200)_nanoFlex_Ieva_SARS_CoV2_i1_Chy_Chymo_90min_ETD_HCD_2ul.raw	F11		1.28	FALSE	0.4712	0.9504
		TRUE	Low	Sequest HT (A16)	Ambiguous	[Y].KLPDDFTGcVIAW.[N]	C9(Carbamidomethyl)	1	1	QHD43416.1_S2_RBD	QHD43416.1_S2_RBD	2	2	0.1684	0	1	1	761.375	1521.74	1521.74	1.06	0.0008	HCD (High Energy Collision Dissociation)	MS2	16.3246	54	119.963	35222	200428_Lumos_(LC1200)_nanoFlex_Ieva_SARS_CoV2_i1_Chy_Chymo_90min_ETD_HCD_2ul.raw	F11		0.95	FALSE	0.3124	0.8774
		TRUE	Low	Sequest HT (A18)	Ambiguous	[Y].KLPDDFTGcVIAW.[N]	C9(Carbamidomethyl)	1	1	QHD43416.1_S2_RBD	QHD43416.1_S2_RBD	2	2	0.3643	0	1	1	761.374	1521.74	1521.74	0.66	0.0005	HCD (High Energy Collision Dissociation)	MS2	10.5169	54	116.105	34033	200428_Lumos_(LC1200)_nanoFlex_Ieva_SARS_CoV2_i1_Chy_Chymo_90min_ETD_HCD_2ul.raw	F11		1.29	FALSE	0.8384	1
		TRUE	Low	Sequest HT (A18)	Ambiguous	[Y].KLPDDFTGcVIAW.[N]	C9(Carbamidomethyl)	1	1	QHD43416.1_S2_RBD	QHD43416.1_S2_RBD	2	2	0.2456	0	1	1	761.374	1521.74	1521.74	0.01	1e-05	HCD (High Energy Collision Dissociation)	MS2	69.3343	54	116.569	34168	200428_Lumos_(LC1200)_nanoFlex_Ieva_SARS_CoV2_i1_Chy_Chymo_90min_ETD_HCD_2ul.raw	F11		1.14	FALSE	0.7647	1
		TRUE	Low	Sequest HT (A18)	Ambiguous	[Y].KLPDDFTGcVIAW.[N]	C9(Carbamidomethyl)	1	1	QHD43416.1_S2_RBD	QHD43416.1_S2_RBD	2	2	0.2477	0	1	1	761.375	1521.74	1521.74	1.46	0.00111	HCD (High Energy Collision Dissociation)	MS2	17.7012	54	117.075	34319	200428_Lumos_(LC1200)_nanoFlex_Ieva_SARS_CoV2_i1_Chy_Chymo_90min_ETD_HCD_2ul.raw	F11		1.09	FALSE	0.8376	1
		TRUE	Low	Sequest HT (A18)	Ambiguous	[Y].KLPDDFTGcVIAW.[N]	C9(Carbamidomethyl)	1	1	QHD43416.1_S2_RBD	QHD43416.1_S2_RBD	2	2	0.3333	0	1	1	761.374	1521.74	1521.74	0.66	0.0005	HCD (High Energy Collision Dissociation)	MS2	6.65358	54	118.175	34668	200428_Lumos_(LC1200)_nanoFlex_Ieva_SARS_CoV2_i1_Chy_Chymo_90min_ETD_HCD_2ul.raw	F11		1.23	FALSE	0.6859	0.9994	76199	118.17
		TRUE	Low	Sequest HT (A18)	Ambiguous	[Y].KLPDDFTGcVIAW.[N]	C9(Carbamidomethyl)	1	1	QHD43416.1_S2_RBD	QHD43416.1_S2_RBD	2	2	0.2756	0	1	1	761.374	1521.74	1521.74	0.33	0.00025	HCD (High Energy Collision Dissociation)	MS2	0	54	118.527	34782	200428_Lumos_(LC1200)_nanoFlex_Ieva_SARS_CoV2_i1_Chy_Chymo_90min_ETD_HCD_2ul.raw	F11		1.27	FALSE	0.8791	1	76199	118.17
		TRUE	Low	Sequest HT (A18)	Ambiguous	[Y].KLPDDFTGcVIAW.[N]	C9(Carbamidomethyl)	1	1	QHD43416.1_S2_RBD	QHD43416.1_S2_RBD	2	2	0.1562	0	1	1	761.374	1521.74	1521.74	0.17	0.00013	HCD (High Energy Collision Dissociation)	MS2	12.8515	54	118.899	34899	200428_Lumos_(LC1200)_nanoFlex_Ieva_SARS_CoV2_i1_Chy_Chymo_90min_ETD_HCD_2ul.raw	F11		0.96	FALSE	0.6978	1
		TRUE	Low	Sequest HT (A18)	Ambiguous	[Y].KLPDDFTGcVIAW.[N]	C9(Carbamidomethyl)	1	1	QHD43416.1_S2_RBD	QHD43416.1_S2_RBD	2	2	0.2578	0	1	1	761.374	1521.74	1521.74	-0.07	-5e-05	HCD (High Energy Collision Dissociation)	MS2	50.4635	54	119.603	35116	200428_Lumos_(LC1200)_nanoFlex_Ieva_SARS_CoV2_i1_Chy_Chymo_90min_ETD_HCD_2ul.raw	F11		1.28	FALSE	0.8553	1
		TRUE	Low	Sequest HT (A18)	Ambiguous	[Y].KLPDDFTGcVIAW.[N]	C9(Carbamidomethyl)	1	1	QHD43416.1_S2_RBD	QHD43416.1_S2_RBD	2	2	0.1368	0	1	1	761.375	1521.74	1521.74	1.06	0.0008	HCD (High Energy Collision Dissociation)	MS2	16.3246	54	119.963	35222	200428_Lumos_(LC1200)_nanoFlex_Ieva_SARS_CoV2_i1_Chy_Chymo_90min_ETD_HCD_2ul.raw	F11		0.95	FALSE	0.9197	1
	TRUE	High	[L].KPFERDISTEIY.[Q]			FALSE	0.00138883	0	1	1	17	QHD43416.1_S2_RBD	QHD43416.1_S2_RBD [289-300]	1	1497.76	93998288		High	High	0	0.01927	3.86	74.73
		Checked	Confidence	Identifying Node	PSM Ambiguity	Annotated Sequence	Modifications	# Protein Groups	# Proteins	Master Protein Accessions	Protein Accessions	# Missed Cleavages	Charge	DeltaScore	DeltaCn	Rank	Search Engine Rank	m/z [Da]	MH+ [Da]	Theo. MH+ [Da]	DeltaM [ppm]	Deltam/z [Da]	Activation Type	MS Order	Isolation Interference [%]	Ion Inject Time [ms]	RT [min]	First Scan	Spectrum File	File ID	Quan Info	XCorr	Contaminant	Percolator q-Value	Percolator PEP	Precursor Abundance	Apex RT [min]
		TRUE	High	Sequest HT (A2)	Unambiguous	[L].KPFERDISTEIY.[Q]		1	1	QHD43416.1_S2_RBD	QHD43416.1_S2_RBD	1	2	0.6516	0	1	1	749.383	1497.76	1497.76	0.3	0.00023	ETD (Electron Transfer Dissociation)	MS2	43.5686	10.783	74.3309	20600	200428_Lumos_(LC1200)_nanoFlex_Ieva_SARS_CoV2_i1_Chy_Chymo_90min_ETD_HCD_2ul.raw	F11		2.87	FALSE	0	0.00375	93998288	74.73
		TRUE	High	Sequest HT (A2)	Unambiguous	[L].KPFERDISTEIY.[Q]		1	1	QHD43416.1_S2_RBD	QHD43416.1_S2_RBD	1	3	0.584	0	1	1	499.925	1497.76	1497.76	0.62	0.00031	ETD (Electron Transfer Dissociation)	MS2	41.9598	12.286	74.4833	20648	200428_Lumos_(LC1200)_nanoFlex_Ieva_SARS_CoV2_i1_Chy_Chymo_90min_ETD_HCD_2ul.raw	F11		3.75	FALSE	0	0.1498
		TRUE	High	Sequest HT (A2)	Unambiguous	[L].KPFERDISTEIY.[Q]		1	1	QHD43416.1_S2_RBD	QHD43416.1_S2_RBD	1	2	0.7581	0	1	1	749.383	1497.76	1497.76	0.3	0.00023	ETD (Electron Transfer Dissociation)	MS2	4.50651	6.278	74.6835	20709	200428_Lumos_(LC1200)_nanoFlex_Ieva_SARS_CoV2_i1_Chy_Chymo_90min_ETD_HCD_2ul.raw	F11		3.1	FALSE	0	0.0108	93998288	74.73
		TRUE	High	Sequest HT (A2)	Unambiguous	[L].KPFERDISTEIY.[Q]		1	1	QHD43416.1_S2_RBD	QHD43416.1_S2_RBD	1	3	0.5638	0	1	1	499.925	1497.76	1497.76	0.74	0.00037	ETD (Electron Transfer Dissociation)	MS2	6.38449	8.828	74.8342	20757	200428_Lumos_(LC1200)_nanoFlex_Ieva_SARS_CoV2_i1_Chy_Chymo_90min_ETD_HCD_2ul.raw	F11		3.76	FALSE	0	0.02954
		TRUE	High	Sequest HT (A2)	Unambiguous	[L].KPFERDISTEIY.[Q]		1	1	QHD43416.1_S2_RBD	QHD43416.1_S2_RBD	1	2	0.6022	0	1	1	749.383	1497.76	1497.76	0.38	0.00029	ETD (Electron Transfer Dissociation)	MS2	10.0138	7.145	75.0489	20821	200428_Lumos_(LC1200)_nanoFlex_Ieva_SARS_CoV2_i1_Chy_Chymo_90min_ETD_HCD_2ul.raw	F11		2.69	FALSE	0	0.01085	93998288	74.73
		TRUE	High	Sequest HT (A2)	Unambiguous	[L].KPFERDISTEIY.[Q]		1	1	QHD43416.1_S2_RBD	QHD43416.1_S2_RBD	1	3	0.6166	0	1	1	499.925	1497.76	1497.76	0.56	0.00028	ETD (Electron Transfer Dissociation)	MS2	17.6219	13.772	75.2219	20874	200428_Lumos_(LC1200)_nanoFlex_Ieva_SARS_CoV2_i1_Chy_Chymo_90min_ETD_HCD_2ul.raw	F11		3.86	FALSE	0	0.01927
		TRUE	High	Sequest HT (A2)	Unambiguous	[L].KPFERDISTEIY.[Q]		1	1	QHD43416.1_S2_RBD	QHD43416.1_S2_RBD	1	2	0.6917	0	1	1	749.383	1497.76	1497.76	-0.19	-0.00014	ETD (Electron Transfer Dissociation)	MS2	11.061	15.286	75.4283	20937	200428_Lumos_(LC1200)_nanoFlex_Ieva_SARS_CoV2_i1_Chy_Chymo_90min_ETD_HCD_2ul.raw	F11		2.66	FALSE	0	0.01569	93998288	74.73
		TRUE	High	Sequest HT (A2)	Unambiguous	[L].KPFERDISTEIY.[Q]		1	1	QHD43416.1_S2_RBD	QHD43416.1_S2_RBD	1	2	0.5289	0	1	1	749.383	1497.76	1497.76	0.3	0.00023	ETD (Electron Transfer Dissociation)	MS2	44.1546	14.27	75.8263	21062	200428_Lumos_(LC1200)_nanoFlex_Ieva_SARS_CoV2_i1_Chy_Chymo_90min_ETD_HCD_2ul.raw	F11		2.25	FALSE	0	0.008879	93998288	74.73
		TRUE	High	Sequest HT (A16)	Unambiguous	[L].KPFERDISTEIY.[Q]		1	1	QHD43416.1_S2_RBD	QHD43416.1_S2_RBD	1	2	0.4209	0	1	1	749.383	1497.76	1497.76	0.3	0.00023	HCD (High Energy Collision Dissociation)	MS2	43.5686	7.75	74.3384	20602	200428_Lumos_(LC1200)_nanoFlex_Ieva_SARS_CoV2_i1_Chy_Chymo_90min_ETD_HCD_2ul.raw	F11		3.16	FALSE	0	0.02751	93998288	74.73
		TRUE	High	Sequest HT (A16)	Unambiguous	[L].KPFERDISTEIY.[Q]		1	1	QHD43416.1_S2_RBD	QHD43416.1_S2_RBD	1	3	0.3289	0	1	1	499.925	1497.76	1497.76	0.62	0.00031	HCD (High Energy Collision Dissociation)	MS2	41.9598	13.024	74.4949	20650	200428_Lumos_(LC1200)_nanoFlex_Ieva_SARS_CoV2_i1_Chy_Chymo_90min_ETD_HCD_2ul.raw	F11		3.8	FALSE	0	0.05985
		TRUE	High	Sequest HT (A16)	Unambiguous	[L].KPFERDISTEIY.[Q]		1	1	QHD43416.1_S2_RBD	QHD43416.1_S2_RBD	1	2	0.3701	0	1	1	749.383	1497.76	1497.76	0.3	0.00023	HCD (High Energy Collision Dissociation)	MS2	4.50651	5.493	74.6919	20711	200428_Lumos_(LC1200)_nanoFlex_Ieva_SARS_CoV2_i1_Chy_Chymo_90min_ETD_HCD_2ul.raw	F11		3.08	FALSE	0	0.02659	93998288	74.73
		TRUE	High	Sequest HT (A16)	Unambiguous	[L].KPFERDISTEIY.[Q]		1	1	QHD43416.1_S2_RBD	QHD43416.1_S2_RBD	1	3	0.312	0	1	1	499.925	1497.76	1497.76	0.74	0.00037	HCD (High Energy Collision Dissociation)	MS2	6.38449	6.246	74.8443	20759	200428_Lumos_(LC1200)_nanoFlex_Ieva_SARS_CoV2_i1_Chy_Chymo_90min_ETD_HCD_2ul.raw	F11		3.59	FALSE	0.0009362	0.08001
		TRUE	High	Sequest HT (A16)	Unambiguous	[L].KPFERDISTEIY.[Q]		1	1	QHD43416.1_S2_RBD	QHD43416.1_S2_RBD	1	2	0.4465	0	1	1	749.383	1497.76	1497.76	0.38	0.00029	HCD (High Energy Collision Dissociation)	MS2	10.0138	4.447	75.0573	20823	200428_Lumos_(LC1200)_nanoFlex_Ieva_SARS_CoV2_i1_Chy_Chymo_90min_ETD_HCD_2ul.raw	F11		3.27	FALSE	0	0.03719	93998288	74.73
		TRUE	High	Sequest HT (A16)	Unambiguous	[L].KPFERDISTEIY.[Q]		1	1	QHD43416.1_S2_RBD	QHD43416.1_S2_RBD	1	3	0.3488	0	1	1	499.925	1497.76	1497.76	0.56	0.00028	HCD (High Energy Collision Dissociation)	MS2	17.6219	8.582	75.2311	20876	200428_Lumos_(LC1200)_nanoFlex_Ieva_SARS_CoV2_i1_Chy_Chymo_90min_ETD_HCD_2ul.raw	F11		3.44	FALSE	0.0009362	0.0791
		TRUE	High	Sequest HT (A16)	Unambiguous	[L].KPFERDISTEIY.[Q]		1	1	QHD43416.1_S2_RBD	QHD43416.1_S2_RBD	1	2	0.3763	0	1	1	749.383	1497.76	1497.76	-0.19	-0.00014	HCD (High Energy Collision Dissociation)	MS2	11.061	7.927	75.4367	20939	200428_Lumos_(LC1200)_nanoFlex_Ieva_SARS_CoV2_i1_Chy_Chymo_90min_ETD_HCD_2ul.raw	F11		2.87	FALSE	0	0.03496	93998288	74.73
		TRUE	Medium	Sequest HT (A16)	Ambiguous	[L].KPFERDISTEIY.[Q]		1	1	QHD43416.1_S2_RBD	QHD43416.1_S2_RBD	1	2	0.2511	0	1	1	749.383	1497.76	1497.76	0.3	0.00023	HCD (High Energy Collision Dissociation)	MS2	44.1546	17.48	75.8332	21064	200428_Lumos_(LC1200)_nanoFlex_Ieva_SARS_CoV2_i1_Chy_Chymo_90min_ETD_HCD_2ul.raw	F11		2.19	FALSE	0.02217	0.4187	93998288	74.73
		TRUE	High	Sequest HT (A18)	Ambiguous	[L].KPFERDISTEIY.[Q]		1	1	QHD43416.1_S2_RBD	QHD43416.1_S2_RBD	1	2	0.1187	0	1	1	749.383	1497.76	1497.76	0.3	0.00023	HCD (High Energy Collision Dissociation)	MS2	44.1546	17.48	75.8332	21064	200428_Lumos_(LC1200)_nanoFlex_Ieva_SARS_CoV2_i1_Chy_Chymo_90min_ETD_HCD_2ul.raw	F11		2.19	FALSE	0.007192	0.2994	93998288	74.73
	TRUE	High	[R].KRISNCVADY.[S]	1xCarbamidomethyl [C6]		FALSE	0.0473233	0	1	1	8	QHD43416.1_S2_RBD	QHD43416.1_S2_RBD [183-192]	0	1225.6	1043621248		High	High	0	0.04883	3.39	46.05
		Checked	Confidence	Identifying Node	PSM Ambiguity	Annotated Sequence	Modifications	# Protein Groups	# Proteins	Master Protein Accessions	Protein Accessions	# Missed Cleavages	Charge	DeltaScore	DeltaCn	Rank	Search Engine Rank	m/z [Da]	MH+ [Da]	Theo. MH+ [Da]	DeltaM [ppm]	Deltam/z [Da]	Activation Type	MS Order	Isolation Interference [%]	Ion Inject Time [ms]	RT [min]	First Scan	Spectrum File	File ID	Quan Info	XCorr	Contaminant	Percolator q-Value	Percolator PEP	Precursor Abundance	Apex RT [min]
		TRUE	Low	Sequest HT (A14)	Ambiguous	[R].KRISNcVADY.[S]	C6(Carbamidomethyl)	1	1	QHD43416.1_S2_RBD	QHD43416.1_S2_RBD	0	2	0.1473	0	1	1	613.303	1225.6	1225.6	-0.07	-5e-05	ETD (Electron Transfer Dissociation)	MS2	1.31875	6.035	45.9544	11955	200428_Lumos_(LC1200)_nanoFlex_Ieva_SARS_CoV2_i1_Chy_Chymo_90min_ETD_HCD_2ul.raw	F11		1.29	FALSE	0.2916	0.7577	754956416	46.05
		TRUE	High	Sequest HT (A14)	Ambiguous	[R].KRISNcVADY.[S]	C6(Carbamidomethyl)	1	1	QHD43416.1_S2_RBD	QHD43416.1_S2_RBD	0	3	0.4163	0	1	1	409.205	1225.6	1225.6	-0.06	-2e-05	ETD (Electron Transfer Dissociation)	MS2	8.53677	14.801	45.9588	11956	200428_Lumos_(LC1200)_nanoFlex_Ieva_SARS_CoV2_i1_Chy_Chymo_90min_ETD_HCD_2ul.raw	F11		2.45	FALSE	0	0.18	288664832	46.06
		TRUE	Low	Sequest HT (A14)	Ambiguous	[R].KRISNcVADY.[S]	C6(Carbamidomethyl)	1	1	QHD43416.1_S2_RBD	QHD43416.1_S2_RBD	0	2	0.4444	0	1	1	613.303	1225.6	1225.6	-0.47	-0.00029	ETD (Electron Transfer Dissociation)	MS2	0.186937	1.437	46.3208	12063	200428_Lumos_(LC1200)_nanoFlex_Ieva_SARS_CoV2_i1_Chy_Chymo_90min_ETD_HCD_2ul.raw	F11		1.98	FALSE	0.2379	0.7137	754956416	46.05
		TRUE	High	Sequest HT (A14)	Ambiguous	[R].KRISNcVADY.[S]	C6(Carbamidomethyl)	1	1	QHD43416.1_S2_RBD	QHD43416.1_S2_RBD	0	3	0.469	0	1	1	409.204	1225.6	1225.6	-0.58	-0.00024	ETD (Electron Transfer Dissociation)	MS2	0.826301	3.133	46.3252	12064	200428_Lumos_(LC1200)_nanoFlex_Ieva_SARS_CoV2_i1_Chy_Chymo_90min_ETD_HCD_2ul.raw	F11		3.39	FALSE	0	0.04883	288664832	46.06
		TRUE	High	Sequest HT (A18)	Ambiguous	[R].KRISNcVADY.[S]	C6(Carbamidomethyl)	1	1	QHD43416.1_S2_RBD	QHD43416.1_S2_RBD	0	2	0.3768	0	1	1	613.303	1225.6	1225.6	-0.07	-5e-05	HCD (High Energy Collision Dissociation)	MS2	1.31875	0.601	45.9634	11957	200428_Lumos_(LC1200)_nanoFlex_Ieva_SARS_CoV2_i1_Chy_Chymo_90min_ETD_HCD_2ul.raw	F11		2.76	FALSE	0.007192	0.3084	754956416	46.05
		TRUE	Low	Sequest HT (A18)	Ambiguous	[R].KRISNcVADY.[S]	C6(Carbamidomethyl)	1	1	QHD43416.1_S2_RBD	QHD43416.1_S2_RBD	0	3	0.505	0	1	1	409.205	1225.6	1225.6	-0.06	-2e-05	HCD (High Energy Collision Dissociation)	MS2	8.53677	1.236	45.9672	11959	200428_Lumos_(LC1200)_nanoFlex_Ieva_SARS_CoV2_i1_Chy_Chymo_90min_ETD_HCD_2ul.raw	F11		3.01	FALSE	0.1169	0.693	288664832	46.06
		TRUE	High	Sequest HT (A18)	Ambiguous	[R].KRISNcVADY.[S]	C6(Carbamidomethyl)	1	1	QHD43416.1_S2_RBD	QHD43416.1_S2_RBD	0	2	0.3943	0	1	1	613.303	1225.6	1225.6	-0.47	-0.00029	HCD (High Energy Collision Dissociation)	MS2	0.186937	0.923	46.3292	12065	200428_Lumos_(LC1200)_nanoFlex_Ieva_SARS_CoV2_i1_Chy_Chymo_90min_ETD_HCD_2ul.raw	F11		2.79	FALSE	0.004512	0.2696	754956416	46.05
		TRUE	Low	Sequest HT (A18)	Ambiguous	[R].KRISNcVADY.[S]	C6(Carbamidomethyl)	1	1	QHD43416.1_S2_RBD	QHD43416.1_S2_RBD	0	3	0.5376	0	1	1	409.204	1225.6	1225.6	-0.58	-0.00024	HCD (High Energy Collision Dissociation)	MS2	0.826301	1.767	46.3366	12067	200428_Lumos_(LC1200)_nanoFlex_Ieva_SARS_CoV2_i1_Chy_Chymo_90min_ETD_HCD_2ul.raw	F11		2.66	FALSE	0.1085	0.6763	288664832	46.06
	TRUE	High	[R].KRISNCVADY.[S]	1xCarbamidomethyl [C6]; 1xDeamidated [N5]		FALSE	0.0501727	0	1	1	6	QHD43416.1_S2_RBD	QHD43416.1_S2_RBD [183-192]	0	1226.58	49138304		High	High	0	0.05145	3.7	46.62
		Checked	Confidence	Identifying Node	PSM Ambiguity	Annotated Sequence	Modifications	# Protein Groups	# Proteins	Master Protein Accessions	Protein Accessions	# Missed Cleavages	Charge	DeltaScore	DeltaCn	Rank	Search Engine Rank	m/z [Da]	MH+ [Da]	Theo. MH+ [Da]	DeltaM [ppm]	Deltam/z [Da]	Activation Type	MS Order	Isolation Interference [%]	Ion Inject Time [ms]	RT [min]	First Scan	Spectrum File	File ID	Quan Info	XCorr	Contaminant	Percolator q-Value	Percolator PEP	Precursor Abundance	Apex RT [min]
		TRUE	Medium	Sequest HT (A14)	Ambiguous	[R].KRISncVADY.[S]	N5(Deamidated); C6(Carbamidomethyl)	1	1	QHD43416.1_S2_RBD	QHD43416.1_S2_RBD	0	2	0.4653	0	1	1	613.796	1226.58	1226.58	0.32	0.00019	ETD (Electron Transfer Dissociation)	MS2	29.3524	13.735	46.5819	12139	200428_Lumos_(LC1200)_nanoFlex_Ieva_SARS_CoV2_i1_Chy_Chymo_90min_ETD_HCD_2ul.raw	F11		2.02	FALSE	0.01637	0.3151	32209280	46.62
		TRUE	High	Sequest HT (A14)	Ambiguous	[R].KRISncVADY.[S]	N5(Deamidated); C6(Carbamidomethyl)	1	1	QHD43416.1_S2_RBD	QHD43416.1_S2_RBD	0	3	0.473	0	1	1	409.533	1226.58	1226.58	0.31	0.00013	ETD (Electron Transfer Dissociation)	MS2	32.797	20.906	46.5915	12142	200428_Lumos_(LC1200)_nanoFlex_Ieva_SARS_CoV2_i1_Chy_Chymo_90min_ETD_HCD_2ul.raw	F11		3.7	FALSE	0	0.05145	16929024	46.62
		TRUE	Low	Sequest HT (A14)	Ambiguous	[R].KRISncVADY.[S]	N5(Deamidated); C6(Carbamidomethyl)	1	1	QHD43416.1_S2_RBD	QHD43416.1_S2_RBD	0	2	0.1677	0	1	1	613.796	1226.58	1226.58	1.21	0.00074	ETD (Electron Transfer Dissociation)	MS2	0	16.573	53.1782	14065	200428_Lumos_(LC1200)_nanoFlex_Ieva_SARS_CoV2_i1_Chy_Chymo_90min_ETD_HCD_2ul.raw	F11		1.55	FALSE	0.1492	0.6384
		TRUE	High	Sequest HT (A18)	Ambiguous	[R].KRISncVADY.[S]	N5(Deamidated); C6(Carbamidomethyl)	1	1	QHD43416.1_S2_RBD	QHD43416.1_S2_RBD	0	2	0.4007	0	1	1	613.796	1226.58	1226.58	0.32	0.00019	HCD (High Energy Collision Dissociation)	MS2	29.3524	6.701	46.5903	12141	200428_Lumos_(LC1200)_nanoFlex_Ieva_SARS_CoV2_i1_Chy_Chymo_90min_ETD_HCD_2ul.raw	F11		2.87	FALSE	0	0.07228	32209280	46.62
		TRUE	Low	Sequest HT (A18)	Ambiguous	[R].KRISncVADY.[S]	N5(Deamidated); C6(Carbamidomethyl)	1	1	QHD43416.1_S2_RBD	QHD43416.1_S2_RBD	0	3	0.3021	0	1	1	409.533	1226.58	1226.58	0.31	0.00013	HCD (High Energy Collision Dissociation)	MS2	32.797	13.307	46.6026	12144	200428_Lumos_(LC1200)_nanoFlex_Ieva_SARS_CoV2_i1_Chy_Chymo_90min_ETD_HCD_2ul.raw	F11		3.31	FALSE	0.06887	0.5959	16929024	46.62
		TRUE	Medium	Sequest HT (A18)	Ambiguous	[R].KRISncVADY.[S]	N5(Deamidated); C6(Carbamidomethyl)	1	1	QHD43416.1_S2_RBD	QHD43416.1_S2_RBD	0	2	0.4053	0	1	1	613.796	1226.58	1226.58	1.21	0.00074	HCD (High Energy Collision Dissociation)	MS2	0	7.972	53.1861	14066	200428_Lumos_(LC1200)_nanoFlex_Ieva_SARS_CoV2_i1_Chy_Chymo_90min_ETD_HCD_2ul.raw	F11		2.64	FALSE	0.0149	0.3632
	TRUE	High	[R].KSNLKPFERDISTEIY.[Q]			FALSE	0.0150147	0	1	1	4	QHD43416.1_S2_RBD	QHD43416.1_S2_RBD [285-300]	2	1940.01	6378654		High	High	0	0.01688	3.97	81.73
		Checked	Confidence	Identifying Node	PSM Ambiguity	Annotated Sequence	Modifications	# Protein Groups	# Proteins	Master Protein Accessions	Protein Accessions	# Missed Cleavages	Charge	DeltaScore	DeltaCn	Rank	Search Engine Rank	m/z [Da]	MH+ [Da]	Theo. MH+ [Da]	DeltaM [ppm]	Deltam/z [Da]	Activation Type	MS Order	Isolation Interference [%]	Ion Inject Time [ms]	RT [min]	First Scan	Spectrum File	File ID	Quan Info	XCorr	Contaminant	Percolator q-Value	Percolator PEP	Precursor Abundance	Apex RT [min]
		TRUE	High	Sequest HT (A14)	Ambiguous	[R].KSNLKPFERDISTEIY.[Q]		1	1	QHD43416.1_S2_RBD	QHD43416.1_S2_RBD	2	3	0.5919	0	1	1	647.342	1940.01	1940.01	-0.41	-0.00027	ETD (Electron Transfer Dissociation)	MS2	51.8687	8.584	81.7181	22972	200428_Lumos_(LC1200)_nanoFlex_Ieva_SARS_CoV2_i1_Chy_Chymo_90min_ETD_HCD_2ul.raw	F11		3.97	FALSE	0	0.01688	6378654	81.73
		TRUE	High	Sequest HT (A14)	Ambiguous	[R].KSNLKPFERDISTEIY.[Q]		1	1	QHD43416.1_S2_RBD	QHD43416.1_S2_RBD	2	2	0.4574	0	1	1	970.509	1940.01	1940.01	-0.44	-0.00042	ETD (Electron Transfer Dissociation)	MS2	52.2935	21.559	81.783	22995	200428_Lumos_(LC1200)_nanoFlex_Ieva_SARS_CoV2_i1_Chy_Chymo_90min_ETD_HCD_2ul.raw	F11		1.88	FALSE	0.0085	0.2779
		TRUE	Low	Sequest HT (A18)	Ambiguous	[R].KSNLKPFERDISTEIY.[Q]		1	1	QHD43416.1_S2_RBD	QHD43416.1_S2_RBD	2	3	0.276	0	1	1	647.342	1940.01	1940.01	-0.41	-0.00027	HCD (High Energy Collision Dissociation)	MS2	51.8687	6.285	81.7269	22974	200428_Lumos_(LC1200)_nanoFlex_Ieva_SARS_CoV2_i1_Chy_Chymo_90min_ETD_HCD_2ul.raw	F11		2.21	FALSE	0.879	1	6378654	81.73
		TRUE	Low	Sequest HT (A18)	Ambiguous	[R].KSNLKPFERDISTEIY.[Q]		1	1	QHD43416.1_S2_RBD	QHD43416.1_S2_RBD	2	2	0.4291	0	1	1	970.509	1940.01	1940.01	-0.44	-0.00042	HCD (High Energy Collision Dissociation)	MS2	52.2935	16.405	81.7908	22997	200428_Lumos_(LC1200)_nanoFlex_Ieva_SARS_CoV2_i1_Chy_Chymo_90min_ETD_HCD_2ul.raw	F11		2.54	FALSE	0.2	0.7552
	TRUE	High	[K].KSTNLVKNKCVNF.[N]	1xCarbamidomethyl [C10]		FALSE	0.00273609	0	1	1	4	QHD43416.1_S2_RBD	QHD43416.1_S2_RBD [356-368]	1	1551.83	14025592		High	High	0	0.01185	5.13	49.53
		Checked	Confidence	Identifying Node	PSM Ambiguity	Annotated Sequence	Modifications	# Protein Groups	# Proteins	Master Protein Accessions	Protein Accessions	# Missed Cleavages	Charge	DeltaScore	DeltaCn	Rank	Search Engine Rank	m/z [Da]	MH+ [Da]	Theo. MH+ [Da]	DeltaM [ppm]	Deltam/z [Da]	Activation Type	MS Order	Isolation Interference [%]	Ion Inject Time [ms]	RT [min]	First Scan	Spectrum File	File ID	Quan Info	XCorr	Contaminant	Percolator q-Value	Percolator PEP	Precursor Abundance	Apex RT [min]
		TRUE	High	Sequest HT (A14)	Ambiguous	[K].KSTNLVKNKcVNF.[N]	C10(Carbamidomethyl)	1	1	QHD43416.1_S2_RBD	QHD43416.1_S2_RBD	1	3	0.6477	0	1	1	517.949	1551.83	1551.83	1.72	0.00089	ETD (Electron Transfer Dissociation)	MS2	66.3854	22.442	49.5761	13002	200428_Lumos_(LC1200)_nanoFlex_Ieva_SARS_CoV2_i1_Chy_Chymo_90min_ETD_HCD_2ul.raw	F11		4.4	FALSE	0	0.003154	14025592	49.53
		TRUE	High	Sequest HT (A14)	Ambiguous	[K].KSTNLVKNKcVNF.[N]	C10(Carbamidomethyl)	1	1	QHD43416.1_S2_RBD	QHD43416.1_S2_RBD	1	2	0.6465	0	1	1	776.421	1551.84	1551.83	2.47	0.00192	ETD (Electron Transfer Dissociation)	MS2	0	54.73	49.5846	13005	200428_Lumos_(LC1200)_nanoFlex_Ieva_SARS_CoV2_i1_Chy_Chymo_90min_ETD_HCD_2ul.raw	F11		2.97	FALSE	0	0.02575
		TRUE	High	Sequest HT (A18)	Ambiguous	[K].KSTNLVKNKcVNF.[N]	C10(Carbamidomethyl)	1	1	QHD43416.1_S2_RBD	QHD43416.1_S2_RBD	1	3	0.5283	0	1	1	517.949	1551.83	1551.83	1.72	0.00089	HCD (High Energy Collision Dissociation)	MS2	66.3854	24.103	49.5838	13004	200428_Lumos_(LC1200)_nanoFlex_Ieva_SARS_CoV2_i1_Chy_Chymo_90min_ETD_HCD_2ul.raw	F11		5.13	FALSE	0	0.01185	14025592	49.53
		TRUE	High	Sequest HT (A18)	Ambiguous	[K].KSTNLVKNKcVNF.[N]	C10(Carbamidomethyl)	1	1	QHD43416.1_S2_RBD	QHD43416.1_S2_RBD	1	2	0.4809	0	1	1	776.421	1551.84	1551.83	2.47	0.00192	HCD (High Energy Collision Dissociation)	MS2	0	27.026	49.5945	13007	200428_Lumos_(LC1200)_nanoFlex_Ieva_SARS_CoV2_i1_Chy_Chymo_90min_ETD_HCD_2ul.raw	F11		3.66	FALSE	0	0.01811
	TRUE	High	[Q].IAPGQTGKIADY.[N]			FALSE	0.00618081	0	1	1	4	QHD43416.1_S2_RBD	QHD43416.1_S2_RBD [237-248]	0	1233.65	4145922304		High	High	0	0.01853	2.86	63.19
		Checked	Confidence	Identifying Node	PSM Ambiguity	Annotated Sequence	Modifications	# Protein Groups	# Proteins	Master Protein Accessions	Protein Accessions	# Missed Cleavages	Charge	DeltaScore	DeltaCn	Rank	Search Engine Rank	m/z [Da]	MH+ [Da]	Theo. MH+ [Da]	DeltaM [ppm]	Deltam/z [Da]	Activation Type	MS Order	Isolation Interference [%]	Ion Inject Time [ms]	RT [min]	First Scan	Spectrum File	File ID	Quan Info	XCorr	Contaminant	Percolator q-Value	Percolator PEP	Precursor Abundance	Apex RT [min]
		TRUE	High	Sequest HT (A14)	Ambiguous	[Q].IAPGQTGKIADY.[N]		1	1	QHD43416.1_S2_RBD	QHD43416.1_S2_RBD	0	2	0.1667	0	1	1	617.327	1233.65	1233.65	0.01	0	ETD (Electron Transfer Dissociation)	MS2	1.00455	3.291	63.0738	17048	200428_Lumos_(LC1200)_nanoFlex_Ieva_SARS_CoV2_i1_Chy_Chymo_90min_ETD_HCD_2ul.raw	F11		1.68	FALSE	0.002536	0.2155	4145922304	63.19
		TRUE	High	Sequest HT (A14)	Ambiguous	[Q].IAPGQTGKIADY.[N]		1	1	QHD43416.1_S2_RBD	QHD43416.1_S2_RBD	0	2	0.521	0	1	1	617.327	1233.65	1233.65	0.2	0.00013	ETD (Electron Transfer Dissociation)	MS2	1.29716	2.114	63.4597	17166	200428_Lumos_(LC1200)_nanoFlex_Ieva_SARS_CoV2_i1_Chy_Chymo_90min_ETD_HCD_2ul.raw	F11		2.86	FALSE	0	0.01853	4145922304	63.19
		TRUE	High	Sequest HT (A18)	Ambiguous	[Q].IAPGQTGKIADY.[N]		1	1	QHD43416.1_S2_RBD	QHD43416.1_S2_RBD	0	2	0.337	0	1	1	617.327	1233.65	1233.65	0.01	0	HCD (High Energy Collision Dissociation)	MS2	1.00455	0.213	63.0829	17050	200428_Lumos_(LC1200)_nanoFlex_Ieva_SARS_CoV2_i1_Chy_Chymo_90min_ETD_HCD_2ul.raw	F11		2.73	FALSE	0	0.01184	4145922304	63.19
		TRUE	High	Sequest HT (A18)	Ambiguous	[Q].IAPGQTGKIADY.[N]		1	1	QHD43416.1_S2_RBD	QHD43416.1_S2_RBD	0	2	0.3068	0	1	1	617.327	1233.65	1233.65	0.2	0.00013	HCD (High Energy Collision Dissociation)	MS2	1.29716	2.889	63.4685	17168	200428_Lumos_(LC1200)_nanoFlex_Ieva_SARS_CoV2_i1_Chy_Chymo_90min_ETD_HCD_2ul.raw	F11		2.51	FALSE	0.004512	0.2576	4145922304	63.19
	TRUE	High	[Q].IAPGQTGKIADYNY.[K]			FALSE	0.0162952	0	1	1	4	QHD43416.1_S2_RBD	QHD43416.1_S2_RBD [237-250]	1	1510.75	99300646		High	High	0	0.028	3.67	73.9
		Checked	Confidence	Identifying Node	PSM Ambiguity	Annotated Sequence	Modifications	# Protein Groups	# Proteins	Master Protein Accessions	Protein Accessions	# Missed Cleavages	Charge	DeltaScore	DeltaCn	Rank	Search Engine Rank	m/z [Da]	MH+ [Da]	Theo. MH+ [Da]	DeltaM [ppm]	Deltam/z [Da]	Activation Type	MS Order	Isolation Interference [%]	Ion Inject Time [ms]	RT [min]	First Scan	Spectrum File	File ID	Quan Info	XCorr	Contaminant	Percolator q-Value	Percolator PEP	Precursor Abundance	Apex RT [min]
		TRUE	High	Sequest HT (A14)	Ambiguous	[Q].IAPGQTGKIADYNY.[K]		1	1	QHD43416.1_S2_RBD	QHD43416.1_S2_RBD	1	2	0.7493	0	1	1	755.881	1510.75	1510.75	0.21	0.00016	ETD (Electron Transfer Dissociation)	MS2	14.5206	11.979	71.4032	19660	200428_Lumos_(LC1200)_nanoFlex_Ieva_SARS_CoV2_i1_Chy_Chymo_90min_ETD_HCD_2ul.raw	F11		3.35	FALSE	0	0.01828	8705990	71.37
		TRUE	High	Sequest HT (A14)	Ambiguous	[Q].IAPGQTGKIADYNY.[K]		1	1	QHD43416.1_S2_RBD	QHD43416.1_S2_RBD	1	2	0.7057	0	1	1	755.882	1510.76	1510.75	1.67	0.00126	ETD (Electron Transfer Dissociation)	MS2	65.8161	9.579	73.7834	20431	200428_Lumos_(LC1200)_nanoFlex_Ieva_SARS_CoV2_i1_Chy_Chymo_90min_ETD_HCD_2ul.raw	F11		3.67	FALSE	0	0.028	90594656	73.9
		TRUE	Medium	Sequest HT (A18)	Ambiguous	[Q].IAPGQTGKIADYNY.[K]		1	1	QHD43416.1_S2_RBD	QHD43416.1_S2_RBD	1	2	0.3129	0	1	1	755.881	1510.75	1510.75	0.21	0.00016	HCD (High Energy Collision Dissociation)	MS2	14.5206	10.243	71.4128	19662	200428_Lumos_(LC1200)_nanoFlex_Ieva_SARS_CoV2_i1_Chy_Chymo_90min_ETD_HCD_2ul.raw	F11		1.63	FALSE	0.03835	0.5146	8705990	71.37
		TRUE	Low	Sequest HT (A18)	Ambiguous	[Q].IAPGQTGKIADYNY.[K]		1	1	QHD43416.1_S2_RBD	QHD43416.1_S2_RBD	1	2	0.2549	0	1	1	755.882	1510.76	1510.75	1.67	0.00126	HCD (High Energy Collision Dissociation)	MS2	65.8161	6.334	73.7925	20433	200428_Lumos_(LC1200)_nanoFlex_Ieva_SARS_CoV2_i1_Chy_Chymo_90min_ETD_HCD_2ul.raw	F11		1.53	FALSE	0.07502	0.6096	90594656	73.9
	TRUE	High	[H].IGGSGSFTVEKGIYQTSNF.[R]			FALSE	0.00629062	0	1	1	2	QHD43416.1_S2_RBD	QHD43416.1_S2_RBD [127-145]	2	1991.97	3.60054e+06		High	High	0	0.01202	3.51	104.47
		Checked	Confidence	Identifying Node	PSM Ambiguity	Annotated Sequence	Modifications	# Protein Groups	# Proteins	Master Protein Accessions	Protein Accessions	# Missed Cleavages	Charge	DeltaScore	DeltaCn	Rank	Search Engine Rank	m/z [Da]	MH+ [Da]	Theo. MH+ [Da]	DeltaM [ppm]	Deltam/z [Da]	Activation Type	MS Order	Isolation Interference [%]	Ion Inject Time [ms]	RT [min]	First Scan	Spectrum File	File ID	Quan Info	XCorr	Contaminant	Percolator q-Value	Percolator PEP	Precursor Abundance	Apex RT [min]
		TRUE	High	Sequest HT (A14)	Ambiguous	[H].IGGSGSFTVEKGIYQTSNF.[R]		1	1	QHD43416.1_S2_RBD	QHD43416.1_S2_RBD	2	2	0.4493	0	1	1	996.488	1991.97	1991.97	-1.12	-0.00111	ETD (Electron Transfer Dissociation)	MS2	27.6918	17.586	104.472	30321	200428_Lumos_(LC1200)_nanoFlex_Ieva_SARS_CoV2_i1_Chy_Chymo_90min_ETD_HCD_2ul.raw	F11		2.27	FALSE	0	0.007306	3.60054e+06	104.47
		TRUE	High	Sequest HT (A18)	Ambiguous	[H].IGGSGSFTVEKGIYQTSNF.[R]		1	1	QHD43416.1_S2_RBD	QHD43416.1_S2_RBD	2	2	0.6068	0	1	1	996.488	1991.97	1991.97	-1.12	-0.00111	HCD (High Energy Collision Dissociation)	MS2	27.6918	14.296	104.48	30323	200428_Lumos_(LC1200)_nanoFlex_Ieva_SARS_CoV2_i1_Chy_Chymo_90min_ETD_HCD_2ul.raw	F11		3.51	FALSE	0	0.01202	3.60054e+06	104.47
	TRUE	High	[L].LHAPATVCGPK.[K]	1xCarbamidomethyl [C8]		FALSE	0.10017	0.00936225	1	1	4	QHD43416.1_S2_RBD	QHD43416.1_S2_RBD [345-355]	1	1150.6	18044408		High	High	0.003676	0.1175	2.53	44.39
		Checked	Confidence	Identifying Node	PSM Ambiguity	Annotated Sequence	Modifications	# Protein Groups	# Proteins	Master Protein Accessions	Protein Accessions	# Missed Cleavages	Charge	DeltaScore	DeltaCn	Rank	Search Engine Rank	m/z [Da]	MH+ [Da]	Theo. MH+ [Da]	DeltaM [ppm]	Deltam/z [Da]	Activation Type	MS Order	Isolation Interference [%]	Ion Inject Time [ms]	RT [min]	First Scan	Spectrum File	File ID	Quan Info	XCorr	Contaminant	Percolator q-Value	Percolator PEP	Precursor Abundance	Apex RT [min]
		TRUE	Low	Sequest HT (A14)	Ambiguous	[L].LHAPATVcGPK.[K]	C8(Carbamidomethyl)	1	1	QHD43416.1_S2_RBD	QHD43416.1_S2_RBD	1	2	0.5706	0	1	1	575.806	1150.6	1150.6	0.59	0.00034	ETD (Electron Transfer Dissociation)	MS2	0	25.119	44.3877	11498	200428_Lumos_(LC1200)_nanoFlex_Ieva_SARS_CoV2_i1_Chy_Chymo_90min_ETD_HCD_2ul.raw	F11		1.7	FALSE	0.4008	0.855	11658891	44.39
		TRUE	Medium	Sequest HT (A14)	Ambiguous	[L].LHAPATVcGPK.[K]	C8(Carbamidomethyl)	1	1	QHD43416.1_S2_RBD	QHD43416.1_S2_RBD	1	3	0.544	0	1	1	384.206	1150.6	1150.6	0.05	2e-05	ETD (Electron Transfer Dissociation)	MS2	68.2679	17.988	44.4237	11510	200428_Lumos_(LC1200)_nanoFlex_Ieva_SARS_CoV2_i1_Chy_Chymo_90min_ETD_HCD_2ul.raw	F11		3.07	FALSE	0.04019	0.4363	6385517	44.34
		TRUE	High	Sequest HT (A18)	Ambiguous	[L].LHAPATVcGPK.[K]	C8(Carbamidomethyl)	1	1	QHD43416.1_S2_RBD	QHD43416.1_S2_RBD	1	2	0.5296	0	1	1	575.806	1150.6	1150.6	0.59	0.00034	HCD (High Energy Collision Dissociation)	MS2	0	12.564	44.3952	11500	200428_Lumos_(LC1200)_nanoFlex_Ieva_SARS_CoV2_i1_Chy_Chymo_90min_ETD_HCD_2ul.raw	F11		2.53	FALSE	0.003676	0.1175	11658891	44.39
		TRUE	Low	Sequest HT (A18)	Ambiguous	[L].LHAPATVcGPK.[K]	C8(Carbamidomethyl)	1	1	QHD43416.1_S2_RBD	QHD43416.1_S2_RBD	1	3	0.4615	0	1	1	384.206	1150.6	1150.6	0.05	2e-05	HCD (High Energy Collision Dissociation)	MS2	68.2679	9.992	44.4317	11511	200428_Lumos_(LC1200)_nanoFlex_Ieva_SARS_CoV2_i1_Chy_Chymo_90min_ETD_HCD_2ul.raw	F11		2.6	FALSE	0.1688	0.737	6385517	44.34
	TRUE	High	[L].LHAPATVCGPKKSTNL.[V]	1xCarbamidomethyl [C8]		FALSE	0.000232059	0	1	1	6	QHD43416.1_S2_RBD	QHD43416.1_S2_RBD [345-360]	1	1693.91	86622904		High	High	0	0.0006771	5.88	49.4
		Checked	Confidence	Identifying Node	PSM Ambiguity	Annotated Sequence	Modifications	# Protein Groups	# Proteins	Master Protein Accessions	Protein Accessions	# Missed Cleavages	Charge	DeltaScore	DeltaCn	Rank	Search Engine Rank	m/z [Da]	MH+ [Da]	Theo. MH+ [Da]	DeltaM [ppm]	Deltam/z [Da]	Activation Type	MS Order	Isolation Interference [%]	Ion Inject Time [ms]	RT [min]	First Scan	Spectrum File	File ID	Quan Info	XCorr	Contaminant	Percolator q-Value	Percolator PEP	Precursor Abundance	Apex RT [min]
		TRUE	High	Sequest HT (A2)	Unambiguous	[L].LHAPATVcGPKKSTNL.[V]	C8(Carbamidomethyl)	1	1	QHD43416.1_S2_RBD	QHD43416.1_S2_RBD	1	3	0.6633	0	1	1	565.307	1693.91	1693.91	0.95	0.00054	ETD (Electron Transfer Dissociation)	MS2	21.3358	23.798	49.0282	12847	200428_Lumos_(LC1200)_nanoFlex_Ieva_SARS_CoV2_i1_Chy_Chymo_90min_ETD_HCD_2ul.raw	F11		5.88	FALSE	0	0.0006771	86622904	49.4
		TRUE	High	Sequest HT (A2)	Unambiguous	[L].LHAPATVcGPKKSTNL.[V]	C8(Carbamidomethyl)	1	1	QHD43416.1_S2_RBD	QHD43416.1_S2_RBD	1	2	0.701	0	1	1	847.458	1693.91	1693.91	2.26	0.00191	ETD (Electron Transfer Dissociation)	MS2	22.0561	63.409	49.1915	12894	200428_Lumos_(LC1200)_nanoFlex_Ieva_SARS_CoV2_i1_Chy_Chymo_90min_ETD_HCD_2ul.raw	F11		3.01	FALSE	0	0.01578	11718866	49.47
		TRUE	High	Sequest HT (A2)	Unambiguous	[L].LHAPATVcGPKKSTNL.[V]	C8(Carbamidomethyl)	1	1	QHD43416.1_S2_RBD	QHD43416.1_S2_RBD	1	3	0.6276	0	1	1	565.308	1693.91	1693.91	1.71	0.00097	ETD (Electron Transfer Dissociation)	MS2	17.4416	4.027	49.4459	12964	200428_Lumos_(LC1200)_nanoFlex_Ieva_SARS_CoV2_i1_Chy_Chymo_90min_ETD_HCD_2ul.raw	F11		5.29	FALSE	0	0.003527	86622904	49.4
		TRUE	High	Sequest HT (A16)	Unambiguous	[L].LHAPATVcGPKKSTNL.[V]	C8(Carbamidomethyl)	1	1	QHD43416.1_S2_RBD	QHD43416.1_S2_RBD	1	3	0.5642	0	1	1	565.307	1693.91	1693.91	0.95	0.00054	HCD (High Energy Collision Dissociation)	MS2	21.3358	18.001	49.038	12849	200428_Lumos_(LC1200)_nanoFlex_Ieva_SARS_CoV2_i1_Chy_Chymo_90min_ETD_HCD_2ul.raw	F11		4.52	FALSE	0	0.007846	86622904	49.4
		TRUE	High	Sequest HT (A16)	Unambiguous	[L].LHAPATVcGPKKSTNL.[V]	C8(Carbamidomethyl)	1	1	QHD43416.1_S2_RBD	QHD43416.1_S2_RBD	1	2	0.6881	0	1	1	847.458	1693.91	1693.91	2.26	0.00191	HCD (High Energy Collision Dissociation)	MS2	22.0561	33.159	49.2003	12896	200428_Lumos_(LC1200)_nanoFlex_Ieva_SARS_CoV2_i1_Chy_Chymo_90min_ETD_HCD_2ul.raw	F11		4.04	FALSE	0	0.001853	11718866	49.47
		TRUE	High	Sequest HT (A16)	Unambiguous	[L].LHAPATVcGPKKSTNL.[V]	C8(Carbamidomethyl)	1	1	QHD43416.1_S2_RBD	QHD43416.1_S2_RBD	1	3	0.5539	0	1	1	565.308	1693.91	1693.91	1.71	0.00097	HCD (High Energy Collision Dissociation)	MS2	17.4416	3.217	49.4576	12966	200428_Lumos_(LC1200)_nanoFlex_Ieva_SARS_CoV2_i1_Chy_Chymo_90min_ETD_HCD_2ul.raw	F11		4.08	FALSE	0	0.02652	86622904	49.4
	TRUE	High	[N].LKPFERDISTEIY.[Q]			FALSE	0.0153595	0	1	1	8	QHD43416.1_S2_RBD	QHD43416.1_S2_RBD [288-300]	2	1610.84	90555112		High	High	0	0.01727	4.53	89.5
		Checked	Confidence	Identifying Node	PSM Ambiguity	Annotated Sequence	Modifications	# Protein Groups	# Proteins	Master Protein Accessions	Protein Accessions	# Missed Cleavages	Charge	DeltaScore	DeltaCn	Rank	Search Engine Rank	m/z [Da]	MH+ [Da]	Theo. MH+ [Da]	DeltaM [ppm]	Deltam/z [Da]	Activation Type	MS Order	Isolation Interference [%]	Ion Inject Time [ms]	RT [min]	First Scan	Spectrum File	File ID	Quan Info	XCorr	Contaminant	Percolator q-Value	Percolator PEP	Precursor Abundance	Apex RT [min]
		TRUE	High	Sequest HT (A14)	Ambiguous	[N].LKPFERDISTEIY.[Q]		1	1	QHD43416.1_S2_RBD	QHD43416.1_S2_RBD	2	2	0.5621	0	1	1	805.925	1610.84	1610.84	0.08	6e-05	ETD (Electron Transfer Dissociation)	MS2	10.4948	16.085	89.2458	25404	200428_Lumos_(LC1200)_nanoFlex_Ieva_SARS_CoV2_i1_Chy_Chymo_90min_ETD_HCD_2ul.raw	F11		2.9	FALSE	0	0.04274	47787456	89.5
		TRUE	High	Sequest HT (A14)	Ambiguous	[N].LKPFERDISTEIY.[Q]		1	1	QHD43416.1_S2_RBD	QHD43416.1_S2_RBD	2	3	0.5501	0	1	1	537.62	1610.84	1610.84	0.94	0.00051	ETD (Electron Transfer Dissociation)	MS2	0	20.422	89.2878	25419	200428_Lumos_(LC1200)_nanoFlex_Ieva_SARS_CoV2_i1_Chy_Chymo_90min_ETD_HCD_2ul.raw	F11		4.49	FALSE	0	0.04002	42767656	89.49
		TRUE	High	Sequest HT (A14)	Ambiguous	[N].LKPFERDISTEIY.[Q]		1	1	QHD43416.1_S2_RBD	QHD43416.1_S2_RBD	2	2	0.6766	0	1	1	805.925	1610.84	1610.84	0.46	0.00037	ETD (Electron Transfer Dissociation)	MS2	12.3148	6.455	89.613	25530	200428_Lumos_(LC1200)_nanoFlex_Ieva_SARS_CoV2_i1_Chy_Chymo_90min_ETD_HCD_2ul.raw	F11		3.34	FALSE	0	0.07414	47787456	89.5
		TRUE	High	Sequest HT (A14)	Ambiguous	[N].LKPFERDISTEIY.[Q]		1	1	QHD43416.1_S2_RBD	QHD43416.1_S2_RBD	2	3	0.574	0	1	1	537.62	1610.84	1610.84	0.94	0.00051	ETD (Electron Transfer Dissociation)	MS2	0	9.811	89.6436	25541	200428_Lumos_(LC1200)_nanoFlex_Ieva_SARS_CoV2_i1_Chy_Chymo_90min_ETD_HCD_2ul.raw	F11		4.53	FALSE	0	0.01727	42767656	89.49
		TRUE	High	Sequest HT (A18)	Ambiguous	[N].LKPFERDISTEIY.[Q]		1	1	QHD43416.1_S2_RBD	QHD43416.1_S2_RBD	2	2	0.4478	0	1	1	805.925	1610.84	1610.84	0.08	6e-05	HCD (High Energy Collision Dissociation)	MS2	10.4948	11.936	89.2562	25407	200428_Lumos_(LC1200)_nanoFlex_Ieva_SARS_CoV2_i1_Chy_Chymo_90min_ETD_HCD_2ul.raw	F11		2.68	FALSE	0.007192	0.2851	47787456	89.5
		TRUE	Low	Sequest HT (A18)	Ambiguous	[N].LKPFERDISTEIY.[Q]		1	1	QHD43416.1_S2_RBD	QHD43416.1_S2_RBD	2	3	0.0791	0	1	1	537.62	1610.84	1610.84	0.94	0.00051	HCD (High Energy Collision Dissociation)	MS2	0	13.032	89.2985	25421	200428_Lumos_(LC1200)_nanoFlex_Ieva_SARS_CoV2_i1_Chy_Chymo_90min_ETD_HCD_2ul.raw	F11		2.15	FALSE	0.9278	1	42767656	89.49
		TRUE	Low	Sequest HT (A18)	Ambiguous	[N].LKPFERDISTEIY.[Q]		1	1	QHD43416.1_S2_RBD	QHD43416.1_S2_RBD	2	2	0.4355	0	1	1	805.925	1610.84	1610.84	0.46	0.00037	HCD (High Energy Collision Dissociation)	MS2	12.3148	4.832	89.6219	25533	200428_Lumos_(LC1200)_nanoFlex_Ieva_SARS_CoV2_i1_Chy_Chymo_90min_ETD_HCD_2ul.raw	F11		2.48	FALSE	0.1072	0.6715	47787456	89.5
		TRUE	Low	Sequest HT (A18)	Ambiguous	[N].LKPFERDISTEIY.[Q]		1	1	QHD43416.1_S2_RBD	QHD43416.1_S2_RBD	2	3	0.0948	0	1	1	537.62	1610.84	1610.84	0.94	0.00051	HCD (High Energy Collision Dissociation)	MS2	0	7.623	89.6551	25543	200428_Lumos_(LC1200)_nanoFlex_Ieva_SARS_CoV2_i1_Chy_Chymo_90min_ETD_HCD_2ul.raw	F11		2.11	FALSE	0.9494	1	42767656	89.49
	TRUE	High	[V].IRGDEVRQIAPGQTGKIADY.[N]			FALSE	1.28759e-05	0	1	1	4	QHD43416.1_S2_RBD	QHD43416.1_S2_RBD [229-248]	0	2187.15	9969909		High	High	0	1.496e-05	9.09	71.68
		Checked	Confidence	Identifying Node	PSM Ambiguity	Annotated Sequence	Modifications	# Protein Groups	# Proteins	Master Protein Accessions	Protein Accessions	# Missed Cleavages	Charge	DeltaScore	DeltaCn	Rank	Search Engine Rank	m/z [Da]	MH+ [Da]	Theo. MH+ [Da]	DeltaM [ppm]	Deltam/z [Da]	Activation Type	MS Order	Isolation Interference [%]	Ion Inject Time [ms]	RT [min]	First Scan	Spectrum File	File ID	Quan Info	XCorr	Contaminant	Percolator q-Value	Percolator PEP	Precursor Abundance	Apex RT [min]
		TRUE	High	Sequest HT (A14)	Ambiguous	[V].IRGDEVRQIAPGQTGKIADY.[N]		1	1	QHD43416.1_S2_RBD	QHD43416.1_S2_RBD	0	4	0.7239	0	1	1	547.544	2187.15	2187.15	0.94	0.00051	ETD (Electron Transfer Dissociation)	MS2	0	18.061	71.6866	19751	200428_Lumos_(LC1200)_nanoFlex_Ieva_SARS_CoV2_i1_Chy_Chymo_90min_ETD_HCD_2ul.raw	F11		9.09	FALSE	0	1.496e-05
		TRUE	Low	Sequest HT (A14)	Ambiguous	[V].IRGDEVRQIAPGQTGKIADY.[N]		1	1	QHD43416.1_S2_RBD	QHD43416.1_S2_RBD	0	3	0.4932	0	1	1	729.723	2187.15	2187.15	0.8	0.00059	ETD (Electron Transfer Dissociation)	MS2	48.0652	11.183	71.7837	19781	200428_Lumos_(LC1200)_nanoFlex_Ieva_SARS_CoV2_i1_Chy_Chymo_90min_ETD_HCD_2ul.raw	F11		2.21	FALSE	0.2951	0.7611	9969909	71.68
		TRUE	Medium	Sequest HT (A18)	Ambiguous	[V].IRGDEVRQIAPGQTGKIADY.[N]		1	1	QHD43416.1_S2_RBD	QHD43416.1_S2_RBD	0	4	0.5487	0	1	1	547.544	2187.15	2187.15	0.94	0.00051	HCD (High Energy Collision Dissociation)	MS2	0	12.313	71.6952	19753	200428_Lumos_(LC1200)_nanoFlex_Ieva_SARS_CoV2_i1_Chy_Chymo_90min_ETD_HCD_2ul.raw	F11		4.83	FALSE	0.0327	0.4776
		TRUE	Low	Sequest HT (A18)	Ambiguous	[V].IRGDEVRQIAPGQTGKIADY.[N]		1	1	QHD43416.1_S2_RBD	QHD43416.1_S2_RBD	0	3	0.2011	0	1	1	729.723	2187.15	2187.15	0.8	0.00059	HCD (High Energy Collision Dissociation)	MS2	48.0652	11.691	71.7918	19783	200428_Lumos_(LC1200)_nanoFlex_Ieva_SARS_CoV2_i1_Chy_Chymo_90min_ETD_HCD_2ul.raw	F11		1.89	FALSE	0.3588	0.8666	9969909	71.68
	TRUE	High	[F].NATRFASVY.[A]	1xDeamidated [N1]		FALSE	0.0313352	0	1	1	2	QHD43416.1_S2_RBD	QHD43416.1_S2_RBD [170-178]	1	1029.5	14941739		High	High	0.005195	0.2961	2.61	75.85
		Checked	Confidence	Identifying Node	PSM Ambiguity	Annotated Sequence	Modifications	# Protein Groups	# Proteins	Master Protein Accessions	Protein Accessions	# Missed Cleavages	Charge	DeltaScore	DeltaCn	Rank	Search Engine Rank	m/z [Da]	MH+ [Da]	Theo. MH+ [Da]	DeltaM [ppm]	Deltam/z [Da]	Activation Type	MS Order	Isolation Interference [%]	Ion Inject Time [ms]	RT [min]	First Scan	Spectrum File	File ID	Quan Info	XCorr	Contaminant	Percolator q-Value	Percolator PEP	Precursor Abundance	Apex RT [min]
		TRUE	High	Sequest HT (A2)	Unambiguous	[F].nATRFASVY.[A]	N1(Deamidated)	1	1	QHD43416.1_S2_RBD	QHD43416.1_S2_RBD	1	2	0.6766	0	1	1	515.254	1029.5	1029.5	-0.06	-3e-05	ETD (Electron Transfer Dissociation)	MS2	0	25.499	75.7911	21050	200428_Lumos_(LC1200)_nanoFlex_Ieva_SARS_CoV2_i1_Chy_Chymo_90min_ETD_HCD_2ul.raw	F11		2.01	FALSE	0	0.06799	14941739	75.85
		TRUE	High	Sequest HT (A16)	Unambiguous	[F].nATRFASVY.[A]	N1(Deamidated)	1	1	QHD43416.1_S2_RBD	QHD43416.1_S2_RBD	1	2	0.4368	0	1	1	515.254	1029.5	1029.5	-0.06	-3e-05	HCD (High Energy Collision Dissociation)	MS2	0	17.656	75.7997	21052	200428_Lumos_(LC1200)_nanoFlex_Ieva_SARS_CoV2_i1_Chy_Chymo_90min_ETD_HCD_2ul.raw	F11		2.61	FALSE	0.005195	0.2961	14941739	75.85
	TRUE	High	[F].NATRFASVY.[A]	1xHexNAc [T3]	QHD43416.1_S2_RBD 1xHexNAc [T172]	FALSE	0.108235	0.00936225	1	1	3	QHD43416.1_S2_RBD	QHD43416.1_S2_RBD [170-178]	1	1231.6	3.56306e+06		High	High	0.0009067	0.1819	1.98	64.6
		Checked	Confidence	Identifying Node	PSM Ambiguity	Annotated Sequence	Modifications	# Protein Groups	# Proteins	Master Protein Accessions	Protein Accessions	# Missed Cleavages	Charge	DeltaScore	DeltaCn	Rank	Search Engine Rank	m/z [Da]	MH+ [Da]	Theo. MH+ [Da]	DeltaM [ppm]	Deltam/z [Da]	Activation Type	MS Order	Isolation Interference [%]	Ion Inject Time [ms]	RT [min]	First Scan	Spectrum File	File ID	Quan Info	XCorr	Contaminant	Percolator q-Value	Percolator PEP	Precursor Abundance	Apex RT [min]
		TRUE	High	Sequest HT (A2)	Unambiguous	[F].NAtRFASVY.[A]	T3(HexNAc)	1	1	QHD43416.1_S2_RBD	QHD43416.1_S2_RBD	1	2	0.5051	0	1	1	616.301	1231.6	1231.6	0.13	8e-05	ETD (Electron Transfer Dissociation)	MS2	31.5126	12.678	64.6471	17540	200428_Lumos_(LC1200)_nanoFlex_Ieva_SARS_CoV2_i1_Chy_Chymo_90min_ETD_HCD_2ul.raw	F11		1.98	FALSE	0.0009067	0.1819	3.56306e+06	64.6
		TRUE	Low	Sequest HT (A16)	Ambiguous	[F].NATRFASVy.[A]	Y9(HexNAc)	1	1	QHD43416.1_S2_RBD	QHD43416.1_S2_RBD	1	2	0.103	0	1	1	616.301	1231.6	1231.6	0.13	8e-05	HCD (High Energy Collision Dissociation)	MS2	31.5126	14.482	64.657	17542	200428_Lumos_(LC1200)_nanoFlex_Ieva_SARS_CoV2_i1_Chy_Chymo_90min_ETD_HCD_2ul.raw	F11		1.65	FALSE	0.6071	0.9928	3.56306e+06	64.6
		TRUE	Low	Sequest HT (A18)	Ambiguous	[F].NATRFASVy.[A]	Y9(HexNAc)	1	1	QHD43416.1_S2_RBD	QHD43416.1_S2_RBD	1	2	0.103	0	1	1	616.301	1231.6	1231.6	0.13	8e-05	HCD (High Energy Collision Dissociation)	MS2	31.5126	14.482	64.657	17542	200428_Lumos_(LC1200)_nanoFlex_Ieva_SARS_CoV2_i1_Chy_Chymo_90min_ETD_HCD_2ul.raw	F11		1.65	FALSE	0.8719	1	3.56306e+06	64.6
	TRUE	High	[L].NDLCFTNVY.[A]	1xCarbamidomethyl [C4]		FALSE	0.0772517	0.00658825	1	1	2	QHD43416.1_S2_RBD	QHD43416.1_S2_RBD [215-223]	2	1145.49	20934696		High	High	0.005195	0.2874	2.66	107.89
		Checked	Confidence	Identifying Node	PSM Ambiguity	Annotated Sequence	Modifications	# Protein Groups	# Proteins	Master Protein Accessions	Protein Accessions	# Missed Cleavages	Charge	DeltaScore	DeltaCn	Rank	Search Engine Rank	m/z [Da]	MH+ [Da]	Theo. MH+ [Da]	DeltaM [ppm]	Deltam/z [Da]	Activation Type	MS Order	Isolation Interference [%]	Ion Inject Time [ms]	RT [min]	First Scan	Spectrum File	File ID	Quan Info	XCorr	Contaminant	Percolator q-Value	Percolator PEP	Precursor Abundance	Apex RT [min]
		TRUE	High	Sequest HT (A2)	Unambiguous	[L].NDLcFTNVY.[A]	C4(Carbamidomethyl)	1	1	QHD43416.1_S2_RBD	QHD43416.1_S2_RBD	2	2	0.5254	0	1	1	573.25	1145.49	1145.49	-0.19	-0.00011	ETD (Electron Transfer Dissociation)	MS2	12.5947	56.379	107.809	31383	200428_Lumos_(LC1200)_nanoFlex_Ieva_SARS_CoV2_i1_Chy_Chymo_90min_ETD_HCD_2ul.raw	F11		1.77	FALSE	0	0.1416	20934696	107.89
		TRUE	High	Sequest HT (A16)	Unambiguous	[L].NDLcFTNVY.[A]	C4(Carbamidomethyl)	1	1	QHD43416.1_S2_RBD	QHD43416.1_S2_RBD	2	2	0.4135	0	1	1	573.25	1145.49	1145.49	-0.19	-0.00011	HCD (High Energy Collision Dissociation)	MS2	12.5947	42.791	107.819	31385	200428_Lumos_(LC1200)_nanoFlex_Ieva_SARS_CoV2_i1_Chy_Chymo_90min_ETD_HCD_2ul.raw	F11		2.66	FALSE	0.005195	0.2874	20934696	107.89
	TRUE	High	[N].NLDSKVGGNY.[N]			FALSE	0.011927	0	1	1	4	QHD43416.1_S2_RBD	QHD43416.1_S2_RBD [267-276]	1	1066.52	5.73492e+08		High	High	0	0.0211	3.21	52.8
		Checked	Confidence	Identifying Node	PSM Ambiguity	Annotated Sequence	Modifications	# Protein Groups	# Proteins	Master Protein Accessions	Protein Accessions	# Missed Cleavages	Charge	DeltaScore	DeltaCn	Rank	Search Engine Rank	m/z [Da]	MH+ [Da]	Theo. MH+ [Da]	DeltaM [ppm]	Deltam/z [Da]	Activation Type	MS Order	Isolation Interference [%]	Ion Inject Time [ms]	RT [min]	First Scan	Spectrum File	File ID	Quan Info	XCorr	Contaminant	Percolator q-Value	Percolator PEP	Precursor Abundance	Apex RT [min]
		TRUE	High	Sequest HT (A14)	Ambiguous	[N].NLDSKVGGNY.[N]		1	1	QHD43416.1_S2_RBD	QHD43416.1_S2_RBD	1	2	0.5268	0	1	1	533.762	1066.52	1066.52	0.38	0.0002	ETD (Electron Transfer Dissociation)	MS2	18.4804	35.971	52.0024	13723	200428_Lumos_(LC1200)_nanoFlex_Ieva_SARS_CoV2_i1_Chy_Chymo_90min_ETD_HCD_2ul.raw	F11		2.24	FALSE	0	0.1416	3.44907e+06	51.98
		TRUE	High	Sequest HT (A14)	Ambiguous	[N].NLDSKVGGNY.[N]		1	1	QHD43416.1_S2_RBD	QHD43416.1_S2_RBD	1	2	0.52	0	1	1	533.762	1066.52	1066.52	0.5	0.00026	ETD (Electron Transfer Dissociation)	MS2	23.6304	19.63	52.6927	13921	200428_Lumos_(LC1200)_nanoFlex_Ieva_SARS_CoV2_i1_Chy_Chymo_90min_ETD_HCD_2ul.raw	F11		2.25	FALSE	0.002536	0.2216	570043200	52.8
		TRUE	High	Sequest HT (A18)	Ambiguous	[N].NLDSKVGGNY.[N]		1	1	QHD43416.1_S2_RBD	QHD43416.1_S2_RBD	1	2	0.3378	0	1	1	533.762	1066.52	1066.52	0.38	0.0002	HCD (High Energy Collision Dissociation)	MS2	18.4804	30.699	52.0106	13725	200428_Lumos_(LC1200)_nanoFlex_Ieva_SARS_CoV2_i1_Chy_Chymo_90min_ETD_HCD_2ul.raw	F11		2.22	FALSE	0.004512	0.1356	3.44907e+06	51.98
		TRUE	High	Sequest HT (A18)	Ambiguous	[N].NLDSKVGGNY.[N]		1	1	QHD43416.1_S2_RBD	QHD43416.1_S2_RBD	1	2	0.4766	0	1	1	533.762	1066.52	1066.52	0.5	0.00026	HCD (High Energy Collision Dissociation)	MS2	23.6304	2.79	52.7012	13923	200428_Lumos_(LC1200)_nanoFlex_Ieva_SARS_CoV2_i1_Chy_Chymo_90min_ETD_HCD_2ul.raw	F11		3.21	FALSE	0	0.0211	570043200	52.8
	TRUE	High	[S].NLKPFERDISTEIY.[Q]			FALSE	0.0800311	0.00658825	1	1	4	QHD43416.1_S2_RBD	QHD43416.1_S2_RBD [287-300]	2	1724.89	69781736		High	High	0	0.07686	3.08	94.17
		Checked	Confidence	Identifying Node	PSM Ambiguity	Annotated Sequence	Modifications	# Protein Groups	# Proteins	Master Protein Accessions	Protein Accessions	# Missed Cleavages	Charge	DeltaScore	DeltaCn	Rank	Search Engine Rank	m/z [Da]	MH+ [Da]	Theo. MH+ [Da]	DeltaM [ppm]	Deltam/z [Da]	Activation Type	MS Order	Isolation Interference [%]	Ion Inject Time [ms]	RT [min]	First Scan	Spectrum File	File ID	Quan Info	XCorr	Contaminant	Percolator q-Value	Percolator PEP	Precursor Abundance	Apex RT [min]
		TRUE	Medium	Sequest HT (A14)	Ambiguous	[S].NLKPFERDISTEIY.[Q]		1	1	QHD43416.1_S2_RBD	QHD43416.1_S2_RBD	2	3	0.5798	0	1	1	575.633	1724.88	1724.89	-0.23	-0.00013	ETD (Electron Transfer Dissociation)	MS2	30.7652	52.144	94.078	27003	200428_Lumos_(LC1200)_nanoFlex_Ieva_SARS_CoV2_i1_Chy_Chymo_90min_ETD_HCD_2ul.raw	F11		3.76	FALSE	0.03008	0.3889	31485312	94.17
		TRUE	High	Sequest HT (A14)	Ambiguous	[S].NLKPFERDISTEIY.[Q]		1	1	QHD43416.1_S2_RBD	QHD43416.1_S2_RBD	2	2	0.6331	0	1	1	862.946	1724.89	1724.89	-0.04	-4e-05	ETD (Electron Transfer Dissociation)	MS2	32.2454	3.416	94.1518	27024	200428_Lumos_(LC1200)_nanoFlex_Ieva_SARS_CoV2_i1_Chy_Chymo_90min_ETD_HCD_2ul.raw	F11		3.08	FALSE	0	0.07686	38296424	94.17
		TRUE	Medium	Sequest HT (A18)	Ambiguous	[S].NLKPFERDISTEIY.[Q]		1	1	QHD43416.1_S2_RBD	QHD43416.1_S2_RBD	2	3	0.3079	0	1	1	575.633	1724.88	1724.89	-0.23	-0.00013	HCD (High Energy Collision Dissociation)	MS2	30.7652	5.808	94.0877	27006	200428_Lumos_(LC1200)_nanoFlex_Ieva_SARS_CoV2_i1_Chy_Chymo_90min_ETD_HCD_2ul.raw	F11		3.28	FALSE	0.02017	0.4524	31485312	94.17
		TRUE	Medium	Sequest HT (A18)	Ambiguous	[S].NLKPFERDISTEIY.[Q]		1	1	QHD43416.1_S2_RBD	QHD43416.1_S2_RBD	2	2	0.4267	0	1	1	862.946	1724.89	1724.89	-0.04	-4e-05	HCD (High Energy Collision Dissociation)	MS2	32.2454	1.702	94.1604	27026	200428_Lumos_(LC1200)_nanoFlex_Ieva_SARS_CoV2_i1_Chy_Chymo_90min_ETD_HCD_2ul.raw	F11		2.25	FALSE	0.02017	0.445	38296424	94.17
	TRUE	High	[T].NLVKNKCVNF.[N]	1xCarbamidomethyl [C7]		FALSE	0.0808449	0.00658825	1	1	8	QHD43416.1_S2_RBD	QHD43416.1_S2_RBD [359-368]	1	1235.66	1.15255e+08		High	High	0	0.0775	3.32	54.29
		Checked	Confidence	Identifying Node	PSM Ambiguity	Annotated Sequence	Modifications	# Protein Groups	# Proteins	Master Protein Accessions	Protein Accessions	# Missed Cleavages	Charge	DeltaScore	DeltaCn	Rank	Search Engine Rank	m/z [Da]	MH+ [Da]	Theo. MH+ [Da]	DeltaM [ppm]	Deltam/z [Da]	Activation Type	MS Order	Isolation Interference [%]	Ion Inject Time [ms]	RT [min]	First Scan	Spectrum File	File ID	Quan Info	XCorr	Contaminant	Percolator q-Value	Percolator PEP	Precursor Abundance	Apex RT [min]
		TRUE	Low	Sequest HT (A14)	Ambiguous	[T].NLVKNKcVNF.[N]	C7(Carbamidomethyl)	1	1	QHD43416.1_S2_RBD	QHD43416.1_S2_RBD	1	3	0.0682	0	1	1	412.558	1235.66	1235.66	1.45	0.0006	ETD (Electron Transfer Dissociation)	MS2	55.1859	53.27	48.5816	12718	200428_Lumos_(LC1200)_nanoFlex_Ieva_SARS_CoV2_i1_Chy_Chymo_90min_ETD_HCD_2ul.raw	F11		1.76	FALSE	0.5085	0.9213	2463501	48.62
		TRUE	Low	Sequest HT (A14)	Ambiguous	[T].NLVKNKcVNF.[N]	C7(Carbamidomethyl)	1	1	QHD43416.1_S2_RBD	QHD43416.1_S2_RBD	1	2	0.1525	0	1	1	618.333	1235.66	1235.66	1.51	0.00093	ETD (Electron Transfer Dissociation)	MS2	0	46.45	48.6503	12740	200428_Lumos_(LC1200)_nanoFlex_Ieva_SARS_CoV2_i1_Chy_Chymo_90min_ETD_HCD_2ul.raw	F11		1.18	FALSE	0.4382	0.8734	3.66252e+06	48.65
		TRUE	Low	Sequest HT (A14)	Ambiguous	[T].NLVKNKcVNF.[N]	C7(Carbamidomethyl)	1	1	QHD43416.1_S2_RBD	QHD43416.1_S2_RBD	1	2	0.295	0	1	1	618.333	1235.66	1235.66	1.51	0.00093	ETD (Electron Transfer Dissociation)	MS2	49.6481	40.677	50.6078	13307	200428_Lumos_(LC1200)_nanoFlex_Ieva_SARS_CoV2_i1_Chy_Chymo_90min_ETD_HCD_2ul.raw	F11		1.39	FALSE	0.2942	0.7608	20966010	50.75
		TRUE	Low	Sequest HT (A14)	Ambiguous	[T].NLVKNKcVNF.[N]	C7(Carbamidomethyl)	1	1	QHD43416.1_S2_RBD	QHD43416.1_S2_RBD	1	3	0.2703	0	1	1	412.557	1235.66	1235.66	0.04	2e-05	ETD (Electron Transfer Dissociation)	MS2	3.75438	34.393	50.6429	13318	200428_Lumos_(LC1200)_nanoFlex_Ieva_SARS_CoV2_i1_Chy_Chymo_90min_ETD_HCD_2ul.raw	F11		2.22	FALSE	0.5847	0.9593	26760988	50.74
		TRUE	Low	Sequest HT (A14)	Ambiguous	[T].NLVKNKcVNF.[N]	C7(Carbamidomethyl)	1	1	QHD43416.1_S2_RBD	QHD43416.1_S2_RBD	1	2	0.2452	0	1	1	618.332	1235.66	1235.66	0.03	2e-05	ETD (Electron Transfer Dissociation)	MS2	46.8478	27.629	50.9733	13417	200428_Lumos_(LC1200)_nanoFlex_Ieva_SARS_CoV2_i1_Chy_Chymo_90min_ETD_HCD_2ul.raw	F11		1.55	FALSE	0.1986	0.6799	20966010	50.75
		TRUE	High	Sequest HT (A14)	Ambiguous	[T].NLVKNKcVNF.[N]	C7(Carbamidomethyl)	1	1	QHD43416.1_S2_RBD	QHD43416.1_S2_RBD	1	3	0.497	0	1	1	412.557	1235.66	1235.66	0.93	0.00038	ETD (Electron Transfer Dissociation)	MS2	9.8975	4.811	54.2582	14366	200428_Lumos_(LC1200)_nanoFlex_Ieva_SARS_CoV2_i1_Chy_Chymo_90min_ETD_HCD_2ul.raw	F11		3.32	FALSE	0	0.0775	61402192	54.29
		TRUE	Low	Sequest HT (A18)	Ambiguous	[T].NLVKNKcVNF.[N]	C7(Carbamidomethyl)	1	1	QHD43416.1_S2_RBD	QHD43416.1_S2_RBD	1	2	0.1679	0	1	1	618.332	1235.66	1235.66	0.03	2e-05	HCD (High Energy Collision Dissociation)	MS2	46.8478	21.235	50.9833	13419	200428_Lumos_(LC1200)_nanoFlex_Ieva_SARS_CoV2_i1_Chy_Chymo_90min_ETD_HCD_2ul.raw	F11		1.31	FALSE	0.6704	0.9917	20966010	50.75
		TRUE	Low	Sequest HT (A18)	Ambiguous	[T].NLVKNKcVNF.[N]	C7(Carbamidomethyl)	1	1	QHD43416.1_S2_RBD	QHD43416.1_S2_RBD	1	3	0.1378	0	1	1	412.557	1235.66	1235.66	0.93	0.00038	HCD (High Energy Collision Dissociation)	MS2	9.8975	2.324	54.2689	14368	200428_Lumos_(LC1200)_nanoFlex_Ieva_SARS_CoV2_i1_Chy_Chymo_90min_ETD_HCD_2ul.raw	F11		1.96	FALSE	0.9338	1	61402192	54.29
	TRUE	High	[T].NLVKNKCVNF.[N]	1xCarbamidomethyl [C7]; 1xDeamidated [N5]		FALSE	0.0167471	0	1	1	6	QHD43416.1_S2_RBD	QHD43416.1_S2_RBD [359-368]	1	1236.64	8.50019e+07		High	High	0	0.02804	3.83	64.35
		Checked	Confidence	Identifying Node	PSM Ambiguity	Annotated Sequence	Modifications	# Protein Groups	# Proteins	Master Protein Accessions	Protein Accessions	# Missed Cleavages	Charge	DeltaScore	DeltaCn	Rank	Search Engine Rank	m/z [Da]	MH+ [Da]	Theo. MH+ [Da]	DeltaM [ppm]	Deltam/z [Da]	Activation Type	MS Order	Isolation Interference [%]	Ion Inject Time [ms]	RT [min]	First Scan	Spectrum File	File ID	Quan Info	XCorr	Contaminant	Percolator q-Value	Percolator PEP	Precursor Abundance	Apex RT [min]
		TRUE	High	Sequest HT (A14)	Ambiguous	[T].NLVKnKcVNF.[N]	N5(Deamidated); C7(Carbamidomethyl)	1	1	QHD43416.1_S2_RBD	QHD43416.1_S2_RBD	1	3	0.36	0	1	1	412.885	1236.64	1236.64	0.71	0.00029	ETD (Electron Transfer Dissociation)	MS2	47.8427	58.925	60.8976	16382	200428_Lumos_(LC1200)_nanoFlex_Ieva_SARS_CoV2_i1_Chy_Chymo_90min_ETD_HCD_2ul.raw	F11		3.5	FALSE	0	0.01874	3.48619e+06	60.87
		TRUE	High	Sequest HT (A14)	Ambiguous	[T].NLVKnKcVNF.[N]	N5(Deamidated); C7(Carbamidomethyl)	1	1	QHD43416.1_S2_RBD	QHD43416.1_S2_RBD	1	2	0.3532	0	1	1	618.824	1236.64	1236.64	-0.07	-5e-05	ETD (Electron Transfer Dissociation)	MS2	29.4091	12.411	64.2577	17420	200428_Lumos_(LC1200)_nanoFlex_Ieva_SARS_CoV2_i1_Chy_Chymo_90min_ETD_HCD_2ul.raw	F11		2.18	FALSE	0	0.09819	42199900	64.35
		TRUE	High	Sequest HT (A14)	Ambiguous	[T].NLVKnKcVNF.[N]	N5(Deamidated); C7(Carbamidomethyl)	1	1	QHD43416.1_S2_RBD	QHD43416.1_S2_RBD	1	3	0.3603	0	1	1	412.885	1236.64	1236.64	-0.33	-0.00014	ETD (Electron Transfer Dissociation)	MS2	0	25.019	64.2708	17424	200428_Lumos_(LC1200)_nanoFlex_Ieva_SARS_CoV2_i1_Chy_Chymo_90min_ETD_HCD_2ul.raw	F11		3.83	FALSE	0	0.02804	39315824	64.35
		TRUE	Low	Sequest HT (A18)	Ambiguous	[T].NLVKnKcVNF.[N]	N5(Deamidated); C7(Carbamidomethyl)	1	1	QHD43416.1_S2_RBD	QHD43416.1_S2_RBD	1	3		0.0484	3	3	412.885	1236.64	1236.64	0.71	0.00029	HCD (High Energy Collision Dissociation)	MS2	47.8427	36.124	60.9103	16385	200428_Lumos_(LC1200)_nanoFlex_Ieva_SARS_CoV2_i1_Chy_Chymo_90min_ETD_HCD_2ul.raw	F11		1.77	FALSE	0.9722	1	3.48619e+06	60.87
		TRUE	High	Sequest HT (A18)	Ambiguous	[T].NLVKnKcVNF.[N]	N5(Deamidated); C7(Carbamidomethyl)	1	1	QHD43416.1_S2_RBD	QHD43416.1_S2_RBD	1	2	0.4108	0	1	1	618.824	1236.64	1236.64	-0.07	-5e-05	HCD (High Energy Collision Dissociation)	MS2	29.4091	5.592	64.2666	17422	200428_Lumos_(LC1200)_nanoFlex_Ieva_SARS_CoV2_i1_Chy_Chymo_90min_ETD_HCD_2ul.raw	F11		3.14	FALSE	0	0.05743	42199900	64.35
		TRUE	Low	Sequest HT (A18)	Ambiguous	[T].NLVKnKcVNF.[N]	N5(Deamidated); C7(Carbamidomethyl)	1	1	QHD43416.1_S2_RBD	QHD43416.1_S2_RBD	1	3	0.3589	0	1	1	412.885	1236.64	1236.64	-0.33	-0.00014	HCD (High Energy Collision Dissociation)	MS2	0	11.91	64.2795	17426	200428_Lumos_(LC1200)_nanoFlex_Ieva_SARS_CoV2_i1_Chy_Chymo_90min_ETD_HCD_2ul.raw	F11		2.87	FALSE	0.665	0.9886	39315824	64.35
	TRUE	High	[S].NNLDSKVGGNY.[N]			FALSE	0.01422	0	1	1	6	QHD43416.1_S2_RBD	QHD43416.1_S2_RBD [266-276]	1	1180.56		No Quan Values	High	High	0	0.02463	3.83
		Checked	Confidence	Identifying Node	PSM Ambiguity	Annotated Sequence	Modifications	# Protein Groups	# Proteins	Master Protein Accessions	Protein Accessions	# Missed Cleavages	Charge	DeltaScore	DeltaCn	Rank	Search Engine Rank	m/z [Da]	MH+ [Da]	Theo. MH+ [Da]	DeltaM [ppm]	Deltam/z [Da]	Activation Type	MS Order	Isolation Interference [%]	Ion Inject Time [ms]	RT [min]	First Scan	Spectrum File	File ID	Quan Info	XCorr	Contaminant	Percolator q-Value	Percolator PEP	Precursor Abundance	Apex RT [min]
		TRUE	High	Sequest HT (A14)	Ambiguous	[S].NNLDSKVGGNY.[N]		1	1	QHD43416.1_S2_RBD	QHD43416.1_S2_RBD	1	2	0.5019	0	1	1	590.783	1180.56	1180.56	-0.14	-8e-05	ETD (Electron Transfer Dissociation)	MS2	19.9971	28.615	54.1359	14335	200428_Lumos_(LC1200)_nanoFlex_Ieva_SARS_CoV2_i1_Chy_Chymo_90min_ETD_HCD_2ul.raw	F11		2.65	FALSE	0	0.104	27828846	54.11
		TRUE	High	Sequest HT (A14)	Ambiguous	[S].NNLDSKVGGNY.[N]		1	1	QHD43416.1_S2_RBD	QHD43416.1_S2_RBD	1	2	0.4669	0	1	1	590.784	1180.56	1180.56	0.9	0.00053	ETD (Electron Transfer Dissociation)	MS2	42.2342	18.633	54.5003	14433	200428_Lumos_(LC1200)_nanoFlex_Ieva_SARS_CoV2_i1_Chy_Chymo_90min_ETD_HCD_2ul.raw	F11		2.72	FALSE	0	0.1155	27828846	54.11
		TRUE	High	Sequest HT (A14)	Ambiguous	[S].NNLDSKVGGNY.[N]		1	1	QHD43416.1_S2_RBD	QHD43416.1_S2_RBD	1	2	0.4542	0	1	1	590.784	1180.56	1180.56	0.38	0.00022	ETD (Electron Transfer Dissociation)	MS2	62.9464	33.156	55.0166	14578	200428_Lumos_(LC1200)_nanoFlex_Ieva_SARS_CoV2_i1_Chy_Chymo_90min_ETD_HCD_2ul.raw	F11		2.62	FALSE	0	0.08505
		TRUE	High	Sequest HT (A18)	Ambiguous	[S].NNLDSKVGGNY.[N]		1	1	QHD43416.1_S2_RBD	QHD43416.1_S2_RBD	1	2	0.5093	0	1	1	590.783	1180.56	1180.56	-0.14	-8e-05	HCD (High Energy Collision Dissociation)	MS2	19.9971	26.232	54.1442	14336	200428_Lumos_(LC1200)_nanoFlex_Ieva_SARS_CoV2_i1_Chy_Chymo_90min_ETD_HCD_2ul.raw	F11		3.75	FALSE	0	0.03282	27828846	54.11
		TRUE	High	Sequest HT (A18)	Ambiguous	[S].NNLDSKVGGNY.[N]		1	1	QHD43416.1_S2_RBD	QHD43416.1_S2_RBD	1	2	0.4386	0	1	1	590.784	1180.56	1180.56	0.9	0.00053	HCD (High Energy Collision Dissociation)	MS2	42.2342	15.122	54.5085	14434	200428_Lumos_(LC1200)_nanoFlex_Ieva_SARS_CoV2_i1_Chy_Chymo_90min_ETD_HCD_2ul.raw	F11		3.83	FALSE	0	0.02463	27828846	54.11
		TRUE	High	Sequest HT (A18)	Ambiguous	[S].NNLDSKVGGNY.[N]		1	1	QHD43416.1_S2_RBD	QHD43416.1_S2_RBD	1	2	0.4427	0	1	1	590.784	1180.56	1180.56	0.38	0.00022	HCD (High Energy Collision Dissociation)	MS2	62.9464	25.646	55.0255	14580	200428_Lumos_(LC1200)_nanoFlex_Ieva_SARS_CoV2_i1_Chy_Chymo_90min_ETD_HCD_2ul.raw	F11		3.75	FALSE	0	0.03406
	TRUE	High	[W].NRKRISNCVAD.[Y]	1xCarbamidomethyl [C8]		FALSE	0.0346177	0	1	1	8	QHD43416.1_S2_RBD	QHD43416.1_S2_RBD [181-191]	0	1332.68	3.32514e+07		High	High	0	0.03689	3.21	22.92
		Checked	Confidence	Identifying Node	PSM Ambiguity	Annotated Sequence	Modifications	# Protein Groups	# Proteins	Master Protein Accessions	Protein Accessions	# Missed Cleavages	Charge	DeltaScore	DeltaCn	Rank	Search Engine Rank	m/z [Da]	MH+ [Da]	Theo. MH+ [Da]	DeltaM [ppm]	Deltam/z [Da]	Activation Type	MS Order	Isolation Interference [%]	Ion Inject Time [ms]	RT [min]	First Scan	Spectrum File	File ID	Quan Info	XCorr	Contaminant	Percolator q-Value	Percolator PEP	Precursor Abundance	Apex RT [min]
		TRUE	High	Sequest HT (A14)	Ambiguous	[W].NRKRISNcVAD.[Y]	C8(Carbamidomethyl)	1	1	QHD43416.1_S2_RBD	QHD43416.1_S2_RBD	0	3	0.5265	0	1	1	444.898	1332.68	1332.68	0.16	7e-05	ETD (Electron Transfer Dissociation)	MS2	4.51659	21.927	22.8779	5588	200428_Lumos_(LC1200)_nanoFlex_Ieva_SARS_CoV2_i1_Chy_Chymo_90min_ETD_HCD_2ul.raw	F11		3.21	FALSE	0	0.03689	27405826	22.92
		TRUE	High	Sequest HT (A14)	Ambiguous	[W].NRKRISNcVAD.[Y]	C8(Carbamidomethyl)	1	1	QHD43416.1_S2_RBD	QHD43416.1_S2_RBD	0	2	0.4231	0	1	1	666.844	1332.68	1332.68	-0.27	-0.00018	ETD (Electron Transfer Dissociation)	MS2	10.9646	86	22.9746	5611	200428_Lumos_(LC1200)_nanoFlex_Ieva_SARS_CoV2_i1_Chy_Chymo_90min_ETD_HCD_2ul.raw	F11		2.08	FALSE	0.001329	0.2024	1.6452e+06	22.91
		TRUE	Medium	Sequest HT (A14)	Ambiguous	[W].NRKRISNcVAD.[Y]	C8(Carbamidomethyl)	1	1	QHD43416.1_S2_RBD	QHD43416.1_S2_RBD	0	2	0.3781	0	1	1	666.844	1332.68	1332.68	0.1	7e-05	ETD (Electron Transfer Dissociation)	MS2	26.5792	86	24.8766	6126	200428_Lumos_(LC1200)_nanoFlex_Ieva_SARS_CoV2_i1_Chy_Chymo_90min_ETD_HCD_2ul.raw	F11		2.01	FALSE	0.01427	0.2991	4200418	24.93
		TRUE	High	Sequest HT (A14)	Ambiguous	[W].NRKRISNcVAD.[Y]	C8(Carbamidomethyl)	1	1	QHD43416.1_S2_RBD	QHD43416.1_S2_RBD	0	2	0.352	0	1	1	666.844	1332.68	1332.68	-0.08	-6e-05	ETD (Electron Transfer Dissociation)	MS2	9.3423	86	25.2699	6229	200428_Lumos_(LC1200)_nanoFlex_Ieva_SARS_CoV2_i1_Chy_Chymo_90min_ETD_HCD_2ul.raw	F11		1.79	FALSE	0.003742	0.2417	4200418	24.93
		TRUE	Low	Sequest HT (A18)	Ambiguous	[W].NRKRISNcVAD.[Y]	C8(Carbamidomethyl)	1	1	QHD43416.1_S2_RBD	QHD43416.1_S2_RBD	0	3	0.4593	0	1	1	444.898	1332.68	1332.68	0.16	7e-05	HCD (High Energy Collision Dissociation)	MS2	4.51659	6.269	22.8892	5590	200428_Lumos_(LC1200)_nanoFlex_Ieva_SARS_CoV2_i1_Chy_Chymo_90min_ETD_HCD_2ul.raw	F11		2.46	FALSE	0.2203	0.7711	27405826	22.92
		TRUE	Low	Sequest HT (A18)	Ambiguous	[W].NRKRISNcVAD.[Y]	C8(Carbamidomethyl)	1	1	QHD43416.1_S2_RBD	QHD43416.1_S2_RBD	0	2	0.234	0	1	1	666.844	1332.68	1332.68	-0.27	-0.00018	HCD (High Energy Collision Dissociation)	MS2	10.9646	54	22.9908	5614	200428_Lumos_(LC1200)_nanoFlex_Ieva_SARS_CoV2_i1_Chy_Chymo_90min_ETD_HCD_2ul.raw	F11		1.41	FALSE	0.6978	1	1.6452e+06	22.91
		TRUE	Low	Sequest HT (A18)	Ambiguous	[W].NRKRISNcVAD.[Y]	C8(Carbamidomethyl)	1	1	QHD43416.1_S2_RBD	QHD43416.1_S2_RBD	0	2	0.4368	0	1	1	666.844	1332.68	1332.68	0.1	7e-05	HCD (High Energy Collision Dissociation)	MS2	26.5792	54	24.8855	6127	200428_Lumos_(LC1200)_nanoFlex_Ieva_SARS_CoV2_i1_Chy_Chymo_90min_ETD_HCD_2ul.raw	F11		1.9	FALSE	0.393	0.8934	4200418	24.93
		TRUE	Low	Sequest HT (A18)	Ambiguous	[W].NRKRISNcVAD.[Y]	C8(Carbamidomethyl)	1	1	QHD43416.1_S2_RBD	QHD43416.1_S2_RBD	0	2	0.2657	0	1	1	666.844	1332.68	1332.68	-0.08	-6e-05	HCD (High Energy Collision Dissociation)	MS2	9.3423	54	25.2793	6231	200428_Lumos_(LC1200)_nanoFlex_Ieva_SARS_CoV2_i1_Chy_Chymo_90min_ETD_HCD_2ul.raw	F11		1.43	FALSE	0.3581	0.8633	4200418	24.93
	TRUE	High	[W].NRKRISNCVADY.[S]	1xCarbamidomethyl [C8]		FALSE	0.000299082	0	1	1	54	QHD43416.1_S2_RBD	QHD43416.1_S2_RBD [181-192]	0	1495.74	1.55072e+10		High	High	0	0.003584	5.51	39.49
		Checked	Confidence	Identifying Node	PSM Ambiguity	Annotated Sequence	Modifications	# Protein Groups	# Proteins	Master Protein Accessions	Protein Accessions	# Missed Cleavages	Charge	DeltaScore	DeltaCn	Rank	Search Engine Rank	m/z [Da]	MH+ [Da]	Theo. MH+ [Da]	DeltaM [ppm]	Deltam/z [Da]	Activation Type	MS Order	Isolation Interference [%]	Ion Inject Time [ms]	RT [min]	First Scan	Spectrum File	File ID	Quan Info	XCorr	Contaminant	Percolator q-Value	Percolator PEP	Precursor Abundance	Apex RT [min]
		TRUE	High	Sequest HT (A2)	Unambiguous	[W].NRKRISNcVADY.[S]	C8(Carbamidomethyl)	1	1	QHD43416.1_S2_RBD	QHD43416.1_S2_RBD	0	2	0.5605	0	1	1	748.376	1495.75	1495.74	1.17	0.00087	ETD (Electron Transfer Dissociation)	MS2	18.4971	86	36.3465	9279	200428_Lumos_(LC1200)_nanoFlex_Ieva_SARS_CoV2_i1_Chy_Chymo_90min_ETD_HCD_2ul.raw	F11		1.57	FALSE	0.001755	0.2025	782939	36.28
		TRUE	High	Sequest HT (A2)	Unambiguous	[W].NRKRISNcVADY.[S]	C8(Carbamidomethyl)	1	1	QHD43416.1_S2_RBD	QHD43416.1_S2_RBD	0	2	0.6646	0	1	1	748.374	1495.74	1495.74	-1.28	-0.00096	ETD (Electron Transfer Dissociation)	MS2	40.8576	44.37	37.3282	9540	200428_Lumos_(LC1200)_nanoFlex_Ieva_SARS_CoV2_i1_Chy_Chymo_90min_ETD_HCD_2ul.raw	F11		1.64	FALSE	0	0.08919	5605302	37.19
		TRUE	High	Sequest HT (A2)	Unambiguous	[W].NRKRISNcVADY.[S]	C8(Carbamidomethyl)	1	1	QHD43416.1_S2_RBD	QHD43416.1_S2_RBD	0	3	0.527	0	1	1	499.252	1495.74	1495.74	-0.62	-0.00031	ETD (Electron Transfer Dissociation)	MS2	31.377	8.928	37.3693	9551	200428_Lumos_(LC1200)_nanoFlex_Ieva_SARS_CoV2_i1_Chy_Chymo_90min_ETD_HCD_2ul.raw	F11		2.96	FALSE	0	0.09191	57432888	37.2
		TRUE	Medium	Sequest HT (A2)	Ambiguous	[W].NRKRISNcVADY.[S]	C8(Carbamidomethyl)	1	1	QHD43416.1_S2_RBD	QHD43416.1_S2_RBD	0	3	0.1192	0	1	1	499.253	1495.74	1495.74	-0.07	-3e-05	ETD (Electron Transfer Dissociation)	MS2	17.4461	11.662	39.0688	10029	200428_Lumos_(LC1200)_nanoFlex_Ieva_SARS_CoV2_i1_Chy_Chymo_90min_ETD_HCD_2ul.raw	F11		1.51	FALSE	0.0153	0.4775	5605317632	39.49
		TRUE	Low	Sequest HT (A2)	Ambiguous	[W].NRKRISNcVADY.[S]	C8(Carbamidomethyl)	1	1	QHD43416.1_S2_RBD	QHD43416.1_S2_RBD	0	2		0.0145	2	2	748.375	1495.74	1495.74	-0.3	-0.00023	ETD (Electron Transfer Dissociation)	MS2	1.53256	3.25	39.1983	10072	200428_Lumos_(LC1200)_nanoFlex_Ieva_SARS_CoV2_i1_Chy_Chymo_90min_ETD_HCD_2ul.raw	F11		0.68	FALSE	0.879	1	4248025344	39.36
		TRUE	High	Sequest HT (A2)	Unambiguous	[W].NRKRISNcVADY.[S]	C8(Carbamidomethyl)	1	1	QHD43416.1_S2_RBD	QHD43416.1_S2_RBD	0	3	0.5956	0	1	1	499.253	1495.74	1495.74	0.24	0.00012	ETD (Electron Transfer Dissociation)	MS2	0.500852	0.109	39.4146	10142	200428_Lumos_(LC1200)_nanoFlex_Ieva_SARS_CoV2_i1_Chy_Chymo_90min_ETD_HCD_2ul.raw	F11		3.61	FALSE	0	0.01369	5464513024	39.67
		TRUE	High	Sequest HT (A2)	Unambiguous	[W].NRKRISNcVADY.[S]	C8(Carbamidomethyl)	1	1	QHD43416.1_S2_RBD	QHD43416.1_S2_RBD	0	4	0.6788	0	1	1	374.691	1495.74	1495.74	-0.08	-3e-05	ETD (Electron Transfer Dissociation)	MS2	0	2.929	39.4826	10161	200428_Lumos_(LC1200)_nanoFlex_Ieva_SARS_CoV2_i1_Chy_Chymo_90min_ETD_HCD_2ul.raw	F11		5.51	FALSE	0	0.003584	115317408	39.85
		TRUE	High	Sequest HT (A2)	Unambiguous	[W].NRKRISNcVADY.[S]	C8(Carbamidomethyl)	1	1	QHD43416.1_S2_RBD	QHD43416.1_S2_RBD	0	2	0.6344	0	1	1	748.375	1495.74	1495.74	0.19	0.00014	ETD (Electron Transfer Dissociation)	MS2	0	0.249	39.5413	10176	200428_Lumos_(LC1200)_nanoFlex_Ieva_SARS_CoV2_i1_Chy_Chymo_90min_ETD_HCD_2ul.raw	F11		2.27	FALSE	0	0.1033	4248025344	39.36
		TRUE	High	Sequest HT (A2)	Unambiguous	[W].NRKRISNcVADY.[S]	C8(Carbamidomethyl)	1	1	QHD43416.1_S2_RBD	QHD43416.1_S2_RBD	0	3	0.6027	0	1	1	499.253	1495.74	1495.74	0.36	0.00018	ETD (Electron Transfer Dissociation)	MS2	0.233526	0.123	39.7727	10242	200428_Lumos_(LC1200)_nanoFlex_Ieva_SARS_CoV2_i1_Chy_Chymo_90min_ETD_HCD_2ul.raw	F11		3.75	FALSE	0	0.006676	5464513024	39.67
		TRUE	High	Sequest HT (A2)	Unambiguous	[W].NRKRISNcVADY.[S]	C8(Carbamidomethyl)	1	1	QHD43416.1_S2_RBD	QHD43416.1_S2_RBD	0	4	0.6794	0	1	1	374.691	1495.74	1495.74	-0.4	-0.00015	ETD (Electron Transfer Dissociation)	MS2	0	3.492	39.824	10258	200428_Lumos_(LC1200)_nanoFlex_Ieva_SARS_CoV2_i1_Chy_Chymo_90min_ETD_HCD_2ul.raw	F11		5.24	FALSE	0	0.0008626	115317408	39.85
		TRUE	High	Sequest HT (A2)	Unambiguous	[W].NRKRISNcVADY.[S]	C8(Carbamidomethyl)	1	1	QHD43416.1_S2_RBD	QHD43416.1_S2_RBD	0	2	0.6468	0	1	1	748.375	1495.74	1495.74	-0.14	-0.0001	ETD (Electron Transfer Dissociation)	MS2	0.992338	0.35	39.8821	10272	200428_Lumos_(LC1200)_nanoFlex_Ieva_SARS_CoV2_i1_Chy_Chymo_90min_ETD_HCD_2ul.raw	F11		2.35	FALSE	0	0.04942	4248025344	39.36
		TRUE	High	Sequest HT (A2)	Unambiguous	[W].NRKRISNcVADY.[S]	C8(Carbamidomethyl)	1	1	QHD43416.1_S2_RBD	QHD43416.1_S2_RBD	0	3	0.5876	0	1	1	499.253	1495.74	1495.74	0.48	0.00024	ETD (Electron Transfer Dissociation)	MS2	0	0.175	40.114	10340	200428_Lumos_(LC1200)_nanoFlex_Ieva_SARS_CoV2_i1_Chy_Chymo_90min_ETD_HCD_2ul.raw	F11		3.54	FALSE	0	0.04188	5464513024	39.67
		TRUE	High	Sequest HT (A2)	Unambiguous	[W].NRKRISNcVADY.[S]	C8(Carbamidomethyl)	1	1	QHD43416.1_S2_RBD	QHD43416.1_S2_RBD	0	4	0.6633	0	1	1	374.691	1495.74	1495.74	-0.48	-0.00018	ETD (Electron Transfer Dissociation)	MS2	0	5.077	40.1683	10357	200428_Lumos_(LC1200)_nanoFlex_Ieva_SARS_CoV2_i1_Chy_Chymo_90min_ETD_HCD_2ul.raw	F11		4.96	FALSE	0	0.006437	115317408	39.85
		TRUE	High	Sequest HT (A2)	Unambiguous	[W].NRKRISNcVADY.[S]	C8(Carbamidomethyl)	1	1	QHD43416.1_S2_RBD	QHD43416.1_S2_RBD	0	2	0.6161	0	1	1	748.375	1495.74	1495.74	-0.3	-0.00023	ETD (Electron Transfer Dissociation)	MS2	0	0.522	40.2333	10376	200428_Lumos_(LC1200)_nanoFlex_Ieva_SARS_CoV2_i1_Chy_Chymo_90min_ETD_HCD_2ul.raw	F11		2.24	FALSE	0	0.04766	4248025344	39.36
		TRUE	High	Sequest HT (A2)	Unambiguous	[W].NRKRISNcVADY.[S]	C8(Carbamidomethyl)	1	1	QHD43416.1_S2_RBD	QHD43416.1_S2_RBD	0	3	0.4684	0	1	1	499.253	1495.74	1495.74	0.79	0.00039	ETD (Electron Transfer Dissociation)	MS2	18.5234	0.256	40.4576	10445	200428_Lumos_(LC1200)_nanoFlex_Ieva_SARS_CoV2_i1_Chy_Chymo_90min_ETD_HCD_2ul.raw	F11		3.16	FALSE	0	0.1361	5464513024	39.67
		TRUE	High	Sequest HT (A2)	Unambiguous	[W].NRKRISNcVADY.[S]	C8(Carbamidomethyl)	1	1	QHD43416.1_S2_RBD	QHD43416.1_S2_RBD	0	4	0.5722	0	1	1	374.691	1495.74	1495.74	-0.48	-0.00018	ETD (Electron Transfer Dissociation)	MS2	9.15691	12.303	40.5267	10466	200428_Lumos_(LC1200)_nanoFlex_Ieva_SARS_CoV2_i1_Chy_Chymo_90min_ETD_HCD_2ul.raw	F11		3.74	FALSE	0	0.0491	115317408	39.85
		TRUE	High	Sequest HT (A2)	Unambiguous	[W].NRKRISNcVADY.[S]	C8(Carbamidomethyl)	1	1	QHD43416.1_S2_RBD	QHD43416.1_S2_RBD	0	2	0.5697	0	1	1	748.375	1495.74	1495.74	-0.47	-0.00035	ETD (Electron Transfer Dissociation)	MS2	0	1.531	40.6088	10489	200428_Lumos_(LC1200)_nanoFlex_Ieva_SARS_CoV2_i1_Chy_Chymo_90min_ETD_HCD_2ul.raw	F11		1.65	FALSE	0	0.07018	4248025344	39.36
		TRUE	High	Sequest HT (A2)	Unambiguous	[W].NRKRISNcVADY.[S]	C8(Carbamidomethyl)	1	1	QHD43416.1_S2_RBD	QHD43416.1_S2_RBD	0	3	0.5091	0	1	1	499.252	1495.74	1495.74	-0.31	-0.00016	ETD (Electron Transfer Dissociation)	MS2	18.1618	2.935	40.8223	10551	200428_Lumos_(LC1200)_nanoFlex_Ieva_SARS_CoV2_i1_Chy_Chymo_90min_ETD_HCD_2ul.raw	F11		3.28	FALSE	0	0.005722	5464513024	39.67
		TRUE	High	Sequest HT (A2)	Unambiguous	[W].NRKRISNcVADY.[S]	C8(Carbamidomethyl)	1	1	QHD43416.1_S2_RBD	QHD43416.1_S2_RBD	0	2	0.6624	0	1	1	748.376	1495.74	1495.74	0.27	0.0002	ETD (Electron Transfer Dissociation)	MS2	27.4642	34.088	41.019	10610	200428_Lumos_(LC1200)_nanoFlex_Ieva_SARS_CoV2_i1_Chy_Chymo_90min_ETD_HCD_2ul.raw	F11		2.34	FALSE	0	0.04792
		TRUE	High	Sequest HT (A2)	Unambiguous	[W].NRKRISNcVADY.[S]	C8(Carbamidomethyl)	1	1	QHD43416.1_S2_RBD	QHD43416.1_S2_RBD	0	3	0.5035	0	1	1	499.253	1495.74	1495.74	0.24	0.00012	ETD (Electron Transfer Dissociation)	MS2	7.86759	27.284	41.8727	10851	200428_Lumos_(LC1200)_nanoFlex_Ieva_SARS_CoV2_i1_Chy_Chymo_90min_ETD_HCD_2ul.raw	F11		2.82	FALSE	0.0009067	0.1945	7948508	42.17
		TRUE	High	Sequest HT (A2)	Unambiguous	[W].NRKRISNcVADY.[S]	C8(Carbamidomethyl)	1	1	QHD43416.1_S2_RBD	QHD43416.1_S2_RBD	0	2	0.5738	0	1	1	748.375	1495.74	1495.74	0.02	2e-05	ETD (Electron Transfer Dissociation)	MS2	0	31.08	42.1669	10933	200428_Lumos_(LC1200)_nanoFlex_Ieva_SARS_CoV2_i1_Chy_Chymo_90min_ETD_HCD_2ul.raw	F11		1.83	FALSE	0	0.04411	2.2513e+06	42.17
		TRUE	High	Sequest HT (A2)	Unambiguous	[W].NRKRISNcVADY.[S]	C8(Carbamidomethyl)	1	1	QHD43416.1_S2_RBD	QHD43416.1_S2_RBD	0	3	0.3561	0	1	1	499.253	1495.74	1495.74	0.12	6e-05	ETD (Electron Transfer Dissociation)	MS2	18.0919	16.345	42.2612	10961	200428_Lumos_(LC1200)_nanoFlex_Ieva_SARS_CoV2_i1_Chy_Chymo_90min_ETD_HCD_2ul.raw	F11		2.78	FALSE	0.002538	0.3131	7948508	42.17
		TRUE	Medium	Sequest HT (A14)	Ambiguous	[W].NRKRISNcVADY.[S]	C8(Carbamidomethyl)	1	1	QHD43416.1_S2_RBD	QHD43416.1_S2_RBD	0	3	0.1192	0	1	1	499.253	1495.74	1495.74	-0.07	-3e-05	ETD (Electron Transfer Dissociation)	MS2	17.4461	11.662	39.0688	10029	200428_Lumos_(LC1200)_nanoFlex_Ieva_SARS_CoV2_i1_Chy_Chymo_90min_ETD_HCD_2ul.raw	F11		1.51	FALSE	0.02244	0.3551	5605317632	39.49
		TRUE	Low	Sequest HT (A16)	Ambiguous	[W].NRKRISNcVADY.[S]	C8(Carbamidomethyl)	1	1	QHD43416.1_S2_RBD	QHD43416.1_S2_RBD	0	2	0.4437	0	1	1	748.376	1495.75	1495.74	1.17	0.00087	HCD (High Energy Collision Dissociation)	MS2	18.4971	54	36.355	9280	200428_Lumos_(LC1200)_nanoFlex_Ieva_SARS_CoV2_i1_Chy_Chymo_90min_ETD_HCD_2ul.raw	F11		1.42	FALSE	0.3883	0.9109	782939	36.28
		TRUE	Low	Sequest HT (A16)	Ambiguous	[W].NRKRISNcVADY.[S]	C8(Carbamidomethyl)	1	1	QHD43416.1_S2_RBD	QHD43416.1_S2_RBD	0	2	0.3919	0	1	1	748.374	1495.74	1495.74	-1.28	-0.00096	HCD (High Energy Collision Dissociation)	MS2	40.8576	44.899	37.3388	9542	200428_Lumos_(LC1200)_nanoFlex_Ieva_SARS_CoV2_i1_Chy_Chymo_90min_ETD_HCD_2ul.raw	F11		1.48	FALSE	0.3995	0.9165	5605302	37.19
		TRUE	High	Sequest HT (A16)	Unambiguous	[W].NRKRISNcVADY.[S]	C8(Carbamidomethyl)	1	1	QHD43416.1_S2_RBD	QHD43416.1_S2_RBD	0	3	0.4951	0	1	1	499.252	1495.74	1495.74	-0.62	-0.00031	HCD (High Energy Collision Dissociation)	MS2	31.377	15.734	37.3765	9553	200428_Lumos_(LC1200)_nanoFlex_Ieva_SARS_CoV2_i1_Chy_Chymo_90min_ETD_HCD_2ul.raw	F11		3.05	FALSE	0	0.05114	57432888	37.2
		TRUE	Low	Sequest HT (A16)	Ambiguous	[W].NRKRISNcVADY.[S]	C8(Carbamidomethyl)	1	1	QHD43416.1_S2_RBD	QHD43416.1_S2_RBD	0	3	0.1593	0	1	1	499.253	1495.74	1495.74	-0.07	-3e-05	HCD (High Energy Collision Dissociation)	MS2	17.4461	14.335	39.0767	10031	200428_Lumos_(LC1200)_nanoFlex_Ieva_SARS_CoV2_i1_Chy_Chymo_90min_ETD_HCD_2ul.raw	F11		1.82	FALSE	0.09645	0.6798	5605317632	39.49
		TRUE	High	Sequest HT (A16)	Unambiguous	[W].NRKRISNcVADY.[S]	C8(Carbamidomethyl)	1	1	QHD43416.1_S2_RBD	QHD43416.1_S2_RBD	0	2	0.6065	0	1	1	748.375	1495.74	1495.74	-0.3	-0.00023	HCD (High Energy Collision Dissociation)	MS2	1.53256	0.129	39.2066	10074	200428_Lumos_(LC1200)_nanoFlex_Ieva_SARS_CoV2_i1_Chy_Chymo_90min_ETD_HCD_2ul.raw	F11		2.16	FALSE	0.00437	0.2745	4248025344	39.36
		TRUE	High	Sequest HT (A16)	Unambiguous	[W].NRKRISNcVADY.[S]	C8(Carbamidomethyl)	1	1	QHD43416.1_S2_RBD	QHD43416.1_S2_RBD	0	3	0.4964	0	1	1	499.253	1495.74	1495.74	0.24	0.00012	HCD (High Energy Collision Dissociation)	MS2	0.500852	0.069	39.4243	10144	200428_Lumos_(LC1200)_nanoFlex_Ieva_SARS_CoV2_i1_Chy_Chymo_90min_ETD_HCD_2ul.raw	F11		2.8	FALSE	0	0.0719	5464513024	39.67
		TRUE	Medium	Sequest HT (A16)	Ambiguous	[W].NRKRISNcVADY.[S]	C8(Carbamidomethyl)	1	1	QHD43416.1_S2_RBD	QHD43416.1_S2_RBD	0	4	0.5803	0	1	1	374.691	1495.74	1495.74	-0.08	-3e-05	HCD (High Energy Collision Dissociation)	MS2	0	1.652	39.4939	10162	200428_Lumos_(LC1200)_nanoFlex_Ieva_SARS_CoV2_i1_Chy_Chymo_90min_ETD_HCD_2ul.raw	F11		2.74	FALSE	0.019	0.4119	115317408	39.85
		TRUE	Medium	Sequest HT (A16)	Ambiguous	[W].NRKRISNcVADY.[S]	C8(Carbamidomethyl)	1	1	QHD43416.1_S2_RBD	QHD43416.1_S2_RBD	0	2	0.5691	0	1	1	748.375	1495.74	1495.74	0.19	0.00014	HCD (High Energy Collision Dissociation)	MS2	0	0.153	39.5513	10178	200428_Lumos_(LC1200)_nanoFlex_Ieva_SARS_CoV2_i1_Chy_Chymo_90min_ETD_HCD_2ul.raw	F11		1.88	FALSE	0.04471	0.5295	4248025344	39.36
		TRUE	High	Sequest HT (A16)	Unambiguous	[W].NRKRISNcVADY.[S]	C8(Carbamidomethyl)	1	1	QHD43416.1_S2_RBD	QHD43416.1_S2_RBD	0	3	0.489	0	1	1	499.253	1495.74	1495.74	0.36	0.00018	HCD (High Energy Collision Dissociation)	MS2	0.233526	0.08	39.7825	10244	200428_Lumos_(LC1200)_nanoFlex_Ieva_SARS_CoV2_i1_Chy_Chymo_90min_ETD_HCD_2ul.raw	F11		2.72	FALSE	0	0.04019	5464513024	39.67
		TRUE	High	Sequest HT (A16)	Unambiguous	[W].NRKRISNcVADY.[S]	C8(Carbamidomethyl)	1	1	QHD43416.1_S2_RBD	QHD43416.1_S2_RBD	0	4	0.5285	0	1	1	374.691	1495.74	1495.74	-0.4	-0.00015	HCD (High Energy Collision Dissociation)	MS2	0	2.66	39.8348	10259	200428_Lumos_(LC1200)_nanoFlex_Ieva_SARS_CoV2_i1_Chy_Chymo_90min_ETD_HCD_2ul.raw	F11		3.16	FALSE	0.001846	0.1884	115317408	39.85
		TRUE	High	Sequest HT (A16)	Unambiguous	[W].NRKRISNcVADY.[S]	C8(Carbamidomethyl)	1	1	QHD43416.1_S2_RBD	QHD43416.1_S2_RBD	0	2	0.5444	0	1	1	748.375	1495.74	1495.74	-0.14	-0.0001	HCD (High Energy Collision Dissociation)	MS2	0.992338	0.199	39.89	10273	200428_Lumos_(LC1200)_nanoFlex_Ieva_SARS_CoV2_i1_Chy_Chymo_90min_ETD_HCD_2ul.raw	F11		1.8	FALSE	0.003547	0.2455	4248025344	39.36
		TRUE	Low	Sequest HT (A16)	Ambiguous	[W].NRKRISNcVADY.[S]	C8(Carbamidomethyl)	1	1	QHD43416.1_S2_RBD	QHD43416.1_S2_RBD	0	2	0.1504	0	1	1	748.375	1495.74	1495.74	-0.14	-0.0001	HCD (High Energy Collision Dissociation)	MS2	0	37.869	39.9452	10290	200428_Lumos_(LC1200)_nanoFlex_Ieva_SARS_CoV2_i1_Chy_Chymo_90min_ETD_HCD_2ul.raw	F11		1.33	FALSE	0.3054	0.8749	4248025344	39.36
		TRUE	High	Sequest HT (A16)	Unambiguous	[W].NRKRISNcVADY.[S]	C8(Carbamidomethyl)	1	1	QHD43416.1_S2_RBD	QHD43416.1_S2_RBD	0	3	0.5185	0	1	1	499.253	1495.74	1495.74	0.48	0.00024	HCD (High Energy Collision Dissociation)	MS2	0	0.097	40.1244	10342	200428_Lumos_(LC1200)_nanoFlex_Ieva_SARS_CoV2_i1_Chy_Chymo_90min_ETD_HCD_2ul.raw	F11		2.7	FALSE	0.0009362	0.1465	5464513024	39.67
		TRUE	Medium	Sequest HT (A16)	Ambiguous	[W].NRKRISNcVADY.[S]	C8(Carbamidomethyl)	1	1	QHD43416.1_S2_RBD	QHD43416.1_S2_RBD	0	4	0.6319	0	1	1	374.691	1495.74	1495.74	-0.48	-0.00018	HCD (High Energy Collision Dissociation)	MS2	0	3.124	40.1812	10359	200428_Lumos_(LC1200)_nanoFlex_Ieva_SARS_CoV2_i1_Chy_Chymo_90min_ETD_HCD_2ul.raw	F11		3.45	FALSE	0.01584	0.3901	115317408	39.85
		TRUE	High	Sequest HT (A16)	Unambiguous	[W].NRKRISNcVADY.[S]	C8(Carbamidomethyl)	1	1	QHD43416.1_S2_RBD	QHD43416.1_S2_RBD	0	2	0.5587	0	1	1	748.375	1495.74	1495.74	-0.3	-0.00023	HCD (High Energy Collision Dissociation)	MS2	0	0.307	40.2411	10377	200428_Lumos_(LC1200)_nanoFlex_Ieva_SARS_CoV2_i1_Chy_Chymo_90min_ETD_HCD_2ul.raw	F11		2.13	FALSE	0.008546	0.3343	4248025344	39.36
		TRUE	High	Sequest HT (A16)	Unambiguous	[W].NRKRISNcVADY.[S]	C8(Carbamidomethyl)	1	1	QHD43416.1_S2_RBD	QHD43416.1_S2_RBD	0	3	0.5	0	1	1	499.253	1495.74	1495.74	0.79	0.00039	HCD (High Energy Collision Dissociation)	MS2	18.5234	0.16	40.4675	10447	200428_Lumos_(LC1200)_nanoFlex_Ieva_SARS_CoV2_i1_Chy_Chymo_90min_ETD_HCD_2ul.raw	F11		2.64	FALSE	0.0009362	0.1456	5464513024	39.67
		TRUE	High	Sequest HT (A16)	Unambiguous	[W].NRKRISNcVADY.[S]	C8(Carbamidomethyl)	1	1	QHD43416.1_S2_RBD	QHD43416.1_S2_RBD	0	4	0.5505	0	1	1	374.691	1495.74	1495.74	-0.48	-0.00018	HCD (High Energy Collision Dissociation)	MS2	9.15691	4.418	40.5397	10468	200428_Lumos_(LC1200)_nanoFlex_Ieva_SARS_CoV2_i1_Chy_Chymo_90min_ETD_HCD_2ul.raw	F11		3.27	FALSE	0.003547	0.2262	115317408	39.85
		TRUE	Medium	Sequest HT (A16)	Ambiguous	[W].NRKRISNcVADY.[S]	C8(Carbamidomethyl)	1	1	QHD43416.1_S2_RBD	QHD43416.1_S2_RBD	0	2	0.5429	0	1	1	748.375	1495.74	1495.74	-0.47	-0.00035	HCD (High Energy Collision Dissociation)	MS2	0	1.115	40.617	10491	200428_Lumos_(LC1200)_nanoFlex_Ieva_SARS_CoV2_i1_Chy_Chymo_90min_ETD_HCD_2ul.raw	F11		1.75	FALSE	0.04728	0.5588	4248025344	39.36
		TRUE	High	Sequest HT (A16)	Unambiguous	[W].NRKRISNcVADY.[S]	C8(Carbamidomethyl)	1	1	QHD43416.1_S2_RBD	QHD43416.1_S2_RBD	0	3	0.5207	0	1	1	499.252	1495.74	1495.74	-0.31	-0.00016	HCD (High Energy Collision Dissociation)	MS2	18.1618	2.283	40.8328	10553	200428_Lumos_(LC1200)_nanoFlex_Ieva_SARS_CoV2_i1_Chy_Chymo_90min_ETD_HCD_2ul.raw	F11		2.9	FALSE	0.003547	0.2248	5464513024	39.67
		TRUE	High	Sequest HT (A16)	Unambiguous	[W].NRKRISNcVADY.[S]	C8(Carbamidomethyl)	1	1	QHD43416.1_S2_RBD	QHD43416.1_S2_RBD	0	2	0.5101	0	1	1	748.376	1495.74	1495.74	0.27	0.0002	HCD (High Energy Collision Dissociation)	MS2	27.4642	45.29	41.0265	10612	200428_Lumos_(LC1200)_nanoFlex_Ieva_SARS_CoV2_i1_Chy_Chymo_90min_ETD_HCD_2ul.raw	F11		1.98	FALSE	0.005195	0.2833
		TRUE	High	Sequest HT (A16)	Unambiguous	[W].NRKRISNcVADY.[S]	C8(Carbamidomethyl)	1	1	QHD43416.1_S2_RBD	QHD43416.1_S2_RBD	0	3	0.44	0	1	1	499.253	1495.74	1495.74	0.24	0.00012	HCD (High Energy Collision Dissociation)	MS2	7.86759	21.822	41.8852	10853	200428_Lumos_(LC1200)_nanoFlex_Ieva_SARS_CoV2_i1_Chy_Chymo_90min_ETD_HCD_2ul.raw	F11		2.75	FALSE	0.002712	0.2078	7948508	42.17
		TRUE	Low	Sequest HT (A16)	Ambiguous	[W].NRKRISNcVADY.[S]	C8(Carbamidomethyl)	1	1	QHD43416.1_S2_RBD	QHD43416.1_S2_RBD	0	2	0.1111	0	1	1	748.375	1495.74	1495.74	0.02	2e-05	HCD (High Energy Collision Dissociation)	MS2	0	16.023	42.1776	10936	200428_Lumos_(LC1200)_nanoFlex_Ieva_SARS_CoV2_i1_Chy_Chymo_90min_ETD_HCD_2ul.raw	F11		0.99	FALSE	0.4452	0.9381	2.2513e+06	42.17
		TRUE	High	Sequest HT (A16)	Unambiguous	[W].NRKRISNcVADY.[S]	C8(Carbamidomethyl)	1	1	QHD43416.1_S2_RBD	QHD43416.1_S2_RBD	0	3	0.3978	0	1	1	499.253	1495.74	1495.74	0.12	6e-05	HCD (High Energy Collision Dissociation)	MS2	18.0919	21.524	42.2727	10963	200428_Lumos_(LC1200)_nanoFlex_Ieva_SARS_CoV2_i1_Chy_Chymo_90min_ETD_HCD_2ul.raw	F11		2.74	FALSE	0.0009362	0.1203	7948508	42.17
		TRUE	Low	Sequest HT (A18)	Ambiguous	[W].NRKRISNcVADY.[S]	C8(Carbamidomethyl)	1	1	QHD43416.1_S2_RBD	QHD43416.1_S2_RBD	0	2	0.169	0	1	1	748.376	1495.75	1495.74	1.17	0.00087	HCD (High Energy Collision Dissociation)	MS2	18.4971	54	36.355	9280	200428_Lumos_(LC1200)_nanoFlex_Ieva_SARS_CoV2_i1_Chy_Chymo_90min_ETD_HCD_2ul.raw	F11		1.42	FALSE	0.3581	0.8656	782939	36.28
		TRUE	Low	Sequest HT (A18)	Ambiguous	[W].NRKRISNcVADY.[S]	C8(Carbamidomethyl)	1	1	QHD43416.1_S2_RBD	QHD43416.1_S2_RBD	0	2	0.1892	0	1	1	748.374	1495.74	1495.74	-1.28	-0.00096	HCD (High Energy Collision Dissociation)	MS2	40.8576	44.899	37.3388	9542	200428_Lumos_(LC1200)_nanoFlex_Ieva_SARS_CoV2_i1_Chy_Chymo_90min_ETD_HCD_2ul.raw	F11		1.48	FALSE	0.1203	0.6987	5605302	37.19
		TRUE	Low	Sequest HT (A18)	Ambiguous	[W].NRKRISNcVADY.[S]	C8(Carbamidomethyl)	1	1	QHD43416.1_S2_RBD	QHD43416.1_S2_RBD	0	3	0.1099	0	1	1	499.253	1495.74	1495.74	-0.07	-3e-05	HCD (High Energy Collision Dissociation)	MS2	17.4461	14.335	39.0767	10031	200428_Lumos_(LC1200)_nanoFlex_Ieva_SARS_CoV2_i1_Chy_Chymo_90min_ETD_HCD_2ul.raw	F11		1.82	FALSE	0.3917	0.892	5605317632	39.49
		TRUE	Low	Sequest HT (A18)	Ambiguous	[W].NRKRISNcVADY.[S]	C8(Carbamidomethyl)	1	1	QHD43416.1_S2_RBD	QHD43416.1_S2_RBD	0	4	0.4526	0	1	1	374.691	1495.74	1495.74	-0.08	-3e-05	HCD (High Energy Collision Dissociation)	MS2	0	1.652	39.4939	10162	200428_Lumos_(LC1200)_nanoFlex_Ieva_SARS_CoV2_i1_Chy_Chymo_90min_ETD_HCD_2ul.raw	F11		2.74	FALSE	0.9025	1	115317408	39.85
		TRUE	Medium	Sequest HT (A18)	Ambiguous	[W].NRKRISNcVADY.[S]	C8(Carbamidomethyl)	1	1	QHD43416.1_S2_RBD	QHD43416.1_S2_RBD	0	2	0.3191	0	1	1	748.375	1495.74	1495.74	0.19	0.00014	HCD (High Energy Collision Dissociation)	MS2	0	0.153	39.5513	10178	200428_Lumos_(LC1200)_nanoFlex_Ieva_SARS_CoV2_i1_Chy_Chymo_90min_ETD_HCD_2ul.raw	F11		1.88	FALSE	0.02017	0.4508	4248025344	39.36
		TRUE	Low	Sequest HT (A18)	Ambiguous	[W].NRKRISNcVADY.[S]	C8(Carbamidomethyl)	1	1	QHD43416.1_S2_RBD	QHD43416.1_S2_RBD	0	2	0.0526	0	1	1	748.375	1495.74	1495.74	-0.14	-0.0001	HCD (High Energy Collision Dissociation)	MS2	0	37.869	39.9452	10290	200428_Lumos_(LC1200)_nanoFlex_Ieva_SARS_CoV2_i1_Chy_Chymo_90min_ETD_HCD_2ul.raw	F11		1.33	FALSE	0.3011	0.835	4248025344	39.36
		TRUE	Low	Sequest HT (A18)	Ambiguous	[W].NRKRISNcVADY.[S]	C8(Carbamidomethyl)	1	1	QHD43416.1_S2_RBD	QHD43416.1_S2_RBD	0	4	0.4957	0	1	1	374.691	1495.74	1495.74	-0.48	-0.00018	HCD (High Energy Collision Dissociation)	MS2	0	3.124	40.1812	10359	200428_Lumos_(LC1200)_nanoFlex_Ieva_SARS_CoV2_i1_Chy_Chymo_90min_ETD_HCD_2ul.raw	F11		3.45	FALSE	0.9324	1	115317408	39.85
		TRUE	Low	Sequest HT (A18)	Ambiguous	[W].NRKRISNcVADY.[S]	C8(Carbamidomethyl)	1	1	QHD43416.1_S2_RBD	QHD43416.1_S2_RBD	0	2	0.2743	0	1	1	748.375	1495.74	1495.74	-0.47	-0.00035	HCD (High Energy Collision Dissociation)	MS2	0	1.115	40.617	10491	200428_Lumos_(LC1200)_nanoFlex_Ieva_SARS_CoV2_i1_Chy_Chymo_90min_ETD_HCD_2ul.raw	F11		1.75	FALSE	0.2219	0.7795	4248025344	39.36
	TRUE	High	[W].NRKRISNCVADY.[S]	1xCarbamidomethyl [C8]; 1xDeamidated [N]		FALSE	0.00033511	0	1	1	37	QHD43416.1_S2_RBD	QHD43416.1_S2_RBD [181-192]	0	1496.73	832654403		High	High	0	0.00096	5.79	47.75
		Checked	Confidence	Identifying Node	PSM Ambiguity	Annotated Sequence	Modifications	# Protein Groups	# Proteins	Master Protein Accessions	Protein Accessions	# Missed Cleavages	Charge	DeltaScore	DeltaCn	Rank	Search Engine Rank	m/z [Da]	MH+ [Da]	Theo. MH+ [Da]	DeltaM [ppm]	Deltam/z [Da]	Activation Type	MS Order	Isolation Interference [%]	Ion Inject Time [ms]	RT [min]	First Scan	Spectrum File	File ID	Quan Info	XCorr	Contaminant	Percolator q-Value	Percolator PEP	Precursor Abundance	Apex RT [min]
		TRUE	High	Sequest HT (A2)	Unambiguous	[W].NRKRISncVADY.[S]	N7(Deamidated); C8(Carbamidomethyl)	1	1	QHD43416.1_S2_RBD	QHD43416.1_S2_RBD	0	4	0.4957	0	1	1	374.937	1496.73	1496.73	-0.41	-0.00015	ETD (Electron Transfer Dissociation)	MS2	31.4622	6.999	40.5436	10471	200428_Lumos_(LC1200)_nanoFlex_Ieva_SARS_CoV2_i1_Chy_Chymo_90min_ETD_HCD_2ul.raw	F11	Not Reliable	5.79	FALSE	0	0.00096
		TRUE	High	Sequest HT (A2)	Unambiguous	[W].NRKRISncVADY.[S]	N7(Deamidated); C8(Carbamidomethyl)	1	1	QHD43416.1_S2_RBD	QHD43416.1_S2_RBD	0	3	0.3236	0	1	1	499.581	1496.73	1496.73	0.42	0.00021	ETD (Electron Transfer Dissociation)	MS2	37.1551	4.543	44.3972	11502	200428_Lumos_(LC1200)_nanoFlex_Ieva_SARS_CoV2_i1_Chy_Chymo_90min_ETD_HCD_2ul.raw	F11		3.43	FALSE	0	0.03293	41496140	44.4
		TRUE	High	Sequest HT (A2)	Unambiguous	[W].NRKRISncVADY.[S]	N7(Deamidated); C8(Carbamidomethyl)	1	1	QHD43416.1_S2_RBD	QHD43416.1_S2_RBD	0	2	0.4245	0	1	1	748.868	1496.73	1496.73	0.75	0.00056	ETD (Electron Transfer Dissociation)	MS2	25.5342	13.544	44.4016	11503	200428_Lumos_(LC1200)_nanoFlex_Ieva_SARS_CoV2_i1_Chy_Chymo_90min_ETD_HCD_2ul.raw	F11		2.12	FALSE	0	0.1094	14676650	44.4
		TRUE	High	Sequest HT (A2)	Unambiguous	[W].NRKRISncVADY.[S]	N7(Deamidated); C8(Carbamidomethyl)	1	1	QHD43416.1_S2_RBD	QHD43416.1_S2_RBD	0	3	0.2508	0	1	1	499.581	1496.73	1496.73	-0.01	-1e-05	ETD (Electron Transfer Dissociation)	MS2	62.4885	44.002	45.1861	11731	200428_Lumos_(LC1200)_nanoFlex_Ieva_SARS_CoV2_i1_Chy_Chymo_90min_ETD_HCD_2ul.raw	F11		3.19	FALSE	0	0.09434	33252606	45.3
		TRUE	High	Sequest HT (A2)	Unambiguous	[W].NRKRISncVADY.[S]	N7(Deamidated); C8(Carbamidomethyl)	1	1	QHD43416.1_S2_RBD	QHD43416.1_S2_RBD	0	2	0.5265	0	1	1	748.867	1496.73	1496.73	0.1	7e-05	ETD (Electron Transfer Dissociation)	MS2	7.9594	58.993	45.2422	11747	200428_Lumos_(LC1200)_nanoFlex_Ieva_SARS_CoV2_i1_Chy_Chymo_90min_ETD_HCD_2ul.raw	F11		2.26	FALSE	0	0.02808	15444330	45.29
		TRUE	High	Sequest HT (A2)	Unambiguous	[W].nRKRISNcVADY.[S]	N1(Deamidated); C8(Carbamidomethyl)	1	1	QHD43416.1_S2_RBD	QHD43416.1_S2_RBD	0	3	0.1529	0	1	1	499.581	1496.73	1496.73	1.03	0.00051	ETD (Electron Transfer Dissociation)	MS2	39.2053	9.389	47.6126	12435	200428_Lumos_(LC1200)_nanoFlex_Ieva_SARS_CoV2_i1_Chy_Chymo_90min_ETD_HCD_2ul.raw	F11		3.14	FALSE	0	0.09593	285890144	47.75
		TRUE	High	Sequest HT (A2)	Unambiguous	[W].nRKRISNcVADY.[S]	N1(Deamidated); C8(Carbamidomethyl)	1	1	QHD43416.1_S2_RBD	QHD43416.1_S2_RBD	0	2	0.1416	0	1	1	748.868	1496.73	1496.73	1.32	0.00099	ETD (Electron Transfer Dissociation)	MS2	20.5253	4.67	47.7033	12461	200428_Lumos_(LC1200)_nanoFlex_Ieva_SARS_CoV2_i1_Chy_Chymo_90min_ETD_HCD_2ul.raw	F11		2.26	FALSE	0	0.09501	110691896	47.77
		TRUE	High	Sequest HT (A2)	Unambiguous	[W].NRKRISncVADY.[S]	N7(Deamidated); C8(Carbamidomethyl)	1	1	QHD43416.1_S2_RBD	QHD43416.1_S2_RBD	0	4	0.526	0	1	1	374.938	1496.73	1496.73	1.22	0.00046	ETD (Electron Transfer Dissociation)	MS2	39.8047	20.869	47.8425	12502	200428_Lumos_(LC1200)_nanoFlex_Ieva_SARS_CoV2_i1_Chy_Chymo_90min_ETD_HCD_2ul.raw	F11		4.43	FALSE	0	0.005528	5440357	47.79
		TRUE	High	Sequest HT (A2)	Unambiguous	[W].NRKRISncVADY.[S]	N7(Deamidated); C8(Carbamidomethyl)	1	1	QHD43416.1_S2_RBD	QHD43416.1_S2_RBD	0	3	0.4441	0	1	1	499.582	1496.73	1496.73	1.95	0.00097	ETD (Electron Transfer Dissociation)	MS2	1.8584	3.358	47.9862	12542	200428_Lumos_(LC1200)_nanoFlex_Ieva_SARS_CoV2_i1_Chy_Chymo_90min_ETD_HCD_2ul.raw	F11		3.76	FALSE	0	0.03807	285890144	47.75
		TRUE	High	Sequest HT (A2)	Unambiguous	[W].nRKRISNcVADY.[S]	N1(Deamidated); C8(Carbamidomethyl)	1	1	QHD43416.1_S2_RBD	QHD43416.1_S2_RBD	0	3	0.125	0	1	1	499.582	1496.73	1496.73	2.19	0.00109	ETD (Electron Transfer Dissociation)	MS2	34.619	37.643	49.3858	12950	200428_Lumos_(LC1200)_nanoFlex_Ieva_SARS_CoV2_i1_Chy_Chymo_90min_ETD_HCD_2ul.raw	F11		2.96	FALSE	0.001755	0.231
		TRUE	High	Sequest HT (A2)	Unambiguous	[W].nRKRISNcVADY.[S]	N1(Deamidated); C8(Carbamidomethyl)	1	1	QHD43416.1_S2_RBD	QHD43416.1_S2_RBD	0	3	0.2212	0	1	1	499.582	1496.73	1496.73	2.13	0.00106	ETD (Electron Transfer Dissociation)	MS2	31.1894	29.007	50.3838	13240	200428_Lumos_(LC1200)_nanoFlex_Ieva_SARS_CoV2_i1_Chy_Chymo_90min_ETD_HCD_2ul.raw	F11		3.39	FALSE	0	0.0434	219169808	50.51
		TRUE	High	Sequest HT (A2)	Unambiguous	[W].nRKRISNcVADY.[S]	N1(Deamidated); C8(Carbamidomethyl)	1	1	QHD43416.1_S2_RBD	QHD43416.1_S2_RBD	0	2	0.4735	0	1	1	748.869	1496.73	1496.73	1.57	0.00117	ETD (Electron Transfer Dissociation)	MS2	47.3892	11.748	50.433	13254	200428_Lumos_(LC1200)_nanoFlex_Ieva_SARS_CoV2_i1_Chy_Chymo_90min_ETD_HCD_2ul.raw	F11		2.45	FALSE	0	0.05319	106592472	50.51
		TRUE	High	Sequest HT (A2)	Unambiguous	[W].nRKRISNcVADY.[S]	N1(Deamidated); C8(Carbamidomethyl)	1	1	QHD43416.1_S2_RBD	QHD43416.1_S2_RBD	0	3	0.2514	0	1	1	499.581	1496.73	1496.73	0.17	9e-05	ETD (Electron Transfer Dissociation)	MS2	3.39252	7.318	50.7552	13351	200428_Lumos_(LC1200)_nanoFlex_Ieva_SARS_CoV2_i1_Chy_Chymo_90min_ETD_HCD_2ul.raw	F11		3.58	FALSE	0	0.0345	219169808	50.51
		TRUE	High	Sequest HT (A16)	Unambiguous	[W].NRKRISncVADY.[S]	N7(Deamidated); C8(Carbamidomethyl)	1	1	QHD43416.1_S2_RBD	QHD43416.1_S2_RBD	0	4	0.4704	0	1	1	374.937	1496.73	1496.73	-0.41	-0.00015	HCD (High Energy Collision Dissociation)	MS2	31.4622	4.837	40.5563	10473	200428_Lumos_(LC1200)_nanoFlex_Ieva_SARS_CoV2_i1_Chy_Chymo_90min_ETD_HCD_2ul.raw	F11	Not Reliable	3.04	FALSE	0.0009362	0.1479
		TRUE	Low	Sequest HT (A16)	Ambiguous	[W].NRKRISncVADY.[S]	N7(Deamidated); C8(Carbamidomethyl)	1	1	QHD43416.1_S2_RBD	QHD43416.1_S2_RBD	0	2	0.1471	0	1	1	748.868	1496.73	1496.73	0.83	0.00062	HCD (High Energy Collision Dissociation)	MS2	0	47.39	40.5974	10485	200428_Lumos_(LC1200)_nanoFlex_Ieva_SARS_CoV2_i1_Chy_Chymo_90min_ETD_HCD_2ul.raw	F11		1.36	FALSE	0.4754	0.9533
		TRUE	High	Sequest HT (A16)	Unambiguous	[W].NRKRISncVADY.[S]	N7(Deamidated); C8(Carbamidomethyl)	1	1	QHD43416.1_S2_RBD	QHD43416.1_S2_RBD	0	3	0.2371	0	1	1	499.581	1496.73	1496.73	0.42	0.00021	HCD (High Energy Collision Dissociation)	MS2	37.1551	3.509	44.4086	11504	200428_Lumos_(LC1200)_nanoFlex_Ieva_SARS_CoV2_i1_Chy_Chymo_90min_ETD_HCD_2ul.raw	F11		2.91	FALSE	0.002712	0.2043	41496140	44.4
		TRUE	Low	Sequest HT (A16)	Ambiguous	[W].NRKRISncVADY.[S]	N7(Deamidated); C8(Carbamidomethyl)	1	1	QHD43416.1_S2_RBD	QHD43416.1_S2_RBD	0	2	0.4134	0	1	1	748.868	1496.73	1496.73	0.75	0.00056	HCD (High Energy Collision Dissociation)	MS2	25.5342	7.74	44.4106	11505	200428_Lumos_(LC1200)_nanoFlex_Ieva_SARS_CoV2_i1_Chy_Chymo_90min_ETD_HCD_2ul.raw	F11		1.79	FALSE	0.1235	0.7244	14676650	44.4
		TRUE	High	Sequest HT (A16)	Unambiguous	[W].NRKRISncVADY.[S]	N7(Deamidated); C8(Carbamidomethyl)	1	1	QHD43416.1_S2_RBD	QHD43416.1_S2_RBD	0	3	0.2357	0	1	1	499.581	1496.73	1496.73	-0.01	-1e-05	HCD (High Energy Collision Dissociation)	MS2	62.4885	20.456	45.1985	11733	200428_Lumos_(LC1200)_nanoFlex_Ieva_SARS_CoV2_i1_Chy_Chymo_90min_ETD_HCD_2ul.raw	F11		2.8	FALSE	0.0009362	0.1367	33252606	45.3
		TRUE	Low	Sequest HT (A16)	Ambiguous	[W].NRKRISncVADY.[S]	N7(Deamidated); C8(Carbamidomethyl)	1	1	QHD43416.1_S2_RBD	QHD43416.1_S2_RBD	0	2	0.4413	0	1	1	748.867	1496.73	1496.73	0.1	7e-05	HCD (High Energy Collision Dissociation)	MS2	7.9594	13.413	45.2538	11749	200428_Lumos_(LC1200)_nanoFlex_Ieva_SARS_CoV2_i1_Chy_Chymo_90min_ETD_HCD_2ul.raw	F11		1.79	FALSE	0.08158	0.6546	15444330	45.29
		TRUE	High	Sequest HT (A16)	Unambiguous	[W].NRKRISncVADY.[S]	N7(Deamidated); C8(Carbamidomethyl)	1	1	QHD43416.1_S2_RBD	QHD43416.1_S2_RBD	0	3	0.0502	0	1	1	499.581	1496.73	1496.73	1.03	0.00051	HCD (High Energy Collision Dissociation)	MS2	39.2053	2.557	47.6254	12437	200428_Lumos_(LC1200)_nanoFlex_Ieva_SARS_CoV2_i1_Chy_Chymo_90min_ETD_HCD_2ul.raw	F11		2.39	FALSE	0.003547	0.2252	285890144	47.75
		TRUE	Low	Sequest HT (A16)	Ambiguous	[W].nRKRISNcVADY.[S]	N1(Deamidated); C8(Carbamidomethyl)	1	1	QHD43416.1_S2_RBD	QHD43416.1_S2_RBD	0	2	0.0497	0	1	1	748.868	1496.73	1496.73	1.32	0.00099	HCD (High Energy Collision Dissociation)	MS2	20.5253	1.665	47.713	12463	200428_Lumos_(LC1200)_nanoFlex_Ieva_SARS_CoV2_i1_Chy_Chymo_90min_ETD_HCD_2ul.raw	F11		1.81	FALSE	0.1004	0.6833	110691896	47.77
		TRUE	Low	Sequest HT (A16)	Ambiguous	[W].NRKRISncVADY.[S]	N7(Deamidated); C8(Carbamidomethyl)	1	1	QHD43416.1_S2_RBD	QHD43416.1_S2_RBD	0	2		0.0497	2	2	748.868	1496.73	1496.73	1.32	0.00099	HCD (High Energy Collision Dissociation)	MS2	20.5253	1.665	47.713	12463	200428_Lumos_(LC1200)_nanoFlex_Ieva_SARS_CoV2_i1_Chy_Chymo_90min_ETD_HCD_2ul.raw	F11		1.72	FALSE	0.2542	0.8504	110691896	47.77
		TRUE	Medium	Sequest HT (A16)	Ambiguous	[W].NRKRISncVADY.[S]	N7(Deamidated); C8(Carbamidomethyl)	1	1	QHD43416.1_S2_RBD	QHD43416.1_S2_RBD	0	4	0.3393	0	1	1	374.938	1496.73	1496.73	1.22	0.00046	HCD (High Energy Collision Dissociation)	MS2	39.8047	53.804	47.8522	12504	200428_Lumos_(LC1200)_nanoFlex_Ieva_SARS_CoV2_i1_Chy_Chymo_90min_ETD_HCD_2ul.raw	F11		2.24	FALSE	0.04424	0.5203	5440357	47.79
		TRUE	High	Sequest HT (A16)	Unambiguous	[W].NRKRISncVADY.[S]	N7(Deamidated); C8(Carbamidomethyl)	1	1	QHD43416.1_S2_RBD	QHD43416.1_S2_RBD	0	3	0.2213	0	1	1	499.582	1496.73	1496.73	1.95	0.00097	HCD (High Energy Collision Dissociation)	MS2	1.8584	3.303	47.9993	12544	200428_Lumos_(LC1200)_nanoFlex_Ieva_SARS_CoV2_i1_Chy_Chymo_90min_ETD_HCD_2ul.raw	F11		2.53	FALSE	0.005195	0.2842	285890144	47.75
		TRUE	Low	Sequest HT (A16)	Ambiguous	[W].NRKRISncVADY.[S]	N7(Deamidated); C8(Carbamidomethyl)	1	1	QHD43416.1_S2_RBD	QHD43416.1_S2_RBD	0	3	0.1556	0	1	1	499.582	1496.73	1496.73	2.19	0.00109	HCD (High Energy Collision Dissociation)	MS2	34.619	36.736	49.395	12951	200428_Lumos_(LC1200)_nanoFlex_Ieva_SARS_CoV2_i1_Chy_Chymo_90min_ETD_HCD_2ul.raw	F11		2.7	FALSE	0.09913	0.6822
		TRUE	High	Sequest HT (A16)	Unambiguous	[W].NRKRISncVADY.[S]	N7(Deamidated); C8(Carbamidomethyl)	1	1	QHD43416.1_S2_RBD	QHD43416.1_S2_RBD	0	3	0.0519	0	1	1	499.582	1496.73	1496.73	2.13	0.00106	HCD (High Energy Collision Dissociation)	MS2	31.1894	14.59	50.3925	13241	200428_Lumos_(LC1200)_nanoFlex_Ieva_SARS_CoV2_i1_Chy_Chymo_90min_ETD_HCD_2ul.raw	F11		3.08	FALSE	0.0009362	0.1311	219169808	50.51
		TRUE	Low	Sequest HT (A16)	Ambiguous	[W].nRKRISNcVADY.[S]	N1(Deamidated); C8(Carbamidomethyl)	1	1	QHD43416.1_S2_RBD	QHD43416.1_S2_RBD	0	2	0.427	0	1	1	748.869	1496.73	1496.73	1.57	0.00117	HCD (High Energy Collision Dissociation)	MS2	47.3892	3.043	50.4426	13256	200428_Lumos_(LC1200)_nanoFlex_Ieva_SARS_CoV2_i1_Chy_Chymo_90min_ETD_HCD_2ul.raw	F11		1.85	FALSE	0.1308	0.7356	106592472	50.51
		TRUE	High	Sequest HT (A16)	Ambiguous	[W].NRKRISncVADY.[S]	N7(Deamidated); C8(Carbamidomethyl)	1	1	QHD43416.1_S2_RBD	QHD43416.1_S2_RBD	0	3	0.0496	0	1	1	499.581	1496.73	1496.73	0.17	9e-05	HCD (High Energy Collision Dissociation)	MS2	3.39252	12.632	50.7648	13353	200428_Lumos_(LC1200)_nanoFlex_Ieva_SARS_CoV2_i1_Chy_Chymo_90min_ETD_HCD_2ul.raw	F11		2.42	FALSE	0.006856	0.3266	219169808	50.51
		TRUE	Medium	Sequest HT (A16)	Ambiguous	[W].nRKRISNcVADY.[S]	N1(Deamidated); C8(Carbamidomethyl)	1	1	QHD43416.1_S2_RBD	QHD43416.1_S2_RBD	0	3		0.0496	2	2	499.581	1496.73	1496.73	0.17	9e-05	HCD (High Energy Collision Dissociation)	MS2	3.39252	12.632	50.7648	13353	200428_Lumos_(LC1200)_nanoFlex_Ieva_SARS_CoV2_i1_Chy_Chymo_90min_ETD_HCD_2ul.raw	F11		2.3	FALSE	0.01263	0.3685	219169808	50.51
		TRUE	Low	Sequest HT (A18)	Ambiguous	[W].NRKRISncVADY.[S]	N7(Deamidated); C8(Carbamidomethyl)	1	1	QHD43416.1_S2_RBD	QHD43416.1_S2_RBD	0	2	0.0809	0	1	1	748.868	1496.73	1496.73	0.83	0.00062	HCD (High Energy Collision Dissociation)	MS2	0	47.39	40.5974	10485	200428_Lumos_(LC1200)_nanoFlex_Ieva_SARS_CoV2_i1_Chy_Chymo_90min_ETD_HCD_2ul.raw	F11		1.36	FALSE	0.7629	1
		TRUE	Low	Sequest HT (A18)	Ambiguous	[W].NRKRISncVADY.[S]	N7(Deamidated); C8(Carbamidomethyl)	1	1	QHD43416.1_S2_RBD	QHD43416.1_S2_RBD	0	2	0.4134	0	1	1	748.868	1496.73	1496.73	0.75	0.00056	HCD (High Energy Collision Dissociation)	MS2	25.5342	7.74	44.4106	11505	200428_Lumos_(LC1200)_nanoFlex_Ieva_SARS_CoV2_i1_Chy_Chymo_90min_ETD_HCD_2ul.raw	F11		1.79	FALSE	0.3037	0.8369	14676650	44.4
		TRUE	Low	Sequest HT (A18)	Ambiguous	[W].NRKRISncVADY.[S]	N7(Deamidated); C8(Carbamidomethyl)	1	1	QHD43416.1_S2_RBD	QHD43416.1_S2_RBD	0	2	0.4022	0	1	1	748.867	1496.73	1496.73	0.1	7e-05	HCD (High Energy Collision Dissociation)	MS2	7.9594	13.413	45.2538	11749	200428_Lumos_(LC1200)_nanoFlex_Ieva_SARS_CoV2_i1_Chy_Chymo_90min_ETD_HCD_2ul.raw	F11		1.79	FALSE	0.0586	0.585	15444330	45.29
		TRUE	Low	Sequest HT (A18)	Ambiguous	[W].nRKRISNcVADY.[S]	N1(Deamidated); C8(Carbamidomethyl)	1	1	QHD43416.1_S2_RBD	QHD43416.1_S2_RBD	0	2	0.0497	0	1	1	748.868	1496.73	1496.73	1.32	0.00099	HCD (High Energy Collision Dissociation)	MS2	20.5253	1.665	47.713	12463	200428_Lumos_(LC1200)_nanoFlex_Ieva_SARS_CoV2_i1_Chy_Chymo_90min_ETD_HCD_2ul.raw	F11		1.81	FALSE	0.06784	0.5935	110691896	47.77
		TRUE	Low	Sequest HT (A18)	Ambiguous	[W].NRKRISncVADY.[S]	N7(Deamidated); C8(Carbamidomethyl)	1	1	QHD43416.1_S2_RBD	QHD43416.1_S2_RBD	0	2		0.0497	2	2	748.868	1496.73	1496.73	1.32	0.00099	HCD (High Energy Collision Dissociation)	MS2	20.5253	1.665	47.713	12463	200428_Lumos_(LC1200)_nanoFlex_Ieva_SARS_CoV2_i1_Chy_Chymo_90min_ETD_HCD_2ul.raw	F11		1.72	FALSE	0.3314	0.8501	110691896	47.77
		TRUE	Low	Sequest HT (A18)	Ambiguous	[W].NRKRISncVADY.[S]	N7(Deamidated); C8(Carbamidomethyl)	1	1	QHD43416.1_S2_RBD	QHD43416.1_S2_RBD	0	4	0.3393	0	1	1	374.938	1496.73	1496.73	1.22	0.00046	HCD (High Energy Collision Dissociation)	MS2	39.8047	53.804	47.8522	12504	200428_Lumos_(LC1200)_nanoFlex_Ieva_SARS_CoV2_i1_Chy_Chymo_90min_ETD_HCD_2ul.raw	F11		2.24	FALSE	0.8651	1	5440357	47.79
		TRUE	Low	Sequest HT (A18)	Ambiguous	[W].NRKRISncVADY.[S]	N7(Deamidated); C8(Carbamidomethyl)	1	1	QHD43416.1_S2_RBD	QHD43416.1_S2_RBD	0	3	0.1556	0	1	1	499.582	1496.73	1496.73	2.19	0.00109	HCD (High Energy Collision Dissociation)	MS2	34.619	36.736	49.395	12951	200428_Lumos_(LC1200)_nanoFlex_Ieva_SARS_CoV2_i1_Chy_Chymo_90min_ETD_HCD_2ul.raw	F11		2.7	FALSE	0.07025	0.6004
		TRUE	Low	Sequest HT (A18)	Ambiguous	[W].nRKRISNcVADY.[S]	N1(Deamidated); C8(Carbamidomethyl)	1	1	QHD43416.1_S2_RBD	QHD43416.1_S2_RBD	0	2	0.3514	0	1	1	748.869	1496.73	1496.73	1.57	0.00117	HCD (High Energy Collision Dissociation)	MS2	47.3892	3.043	50.4426	13256	200428_Lumos_(LC1200)_nanoFlex_Ieva_SARS_CoV2_i1_Chy_Chymo_90min_ETD_HCD_2ul.raw	F11		1.85	FALSE	0.5507	0.9499	106592472	50.51
	TRUE	High	[W].NRKRISNCVADY.[S]	1xCarbamidomethyl [C8]; 2xDeamidated [N1; N7]		FALSE	0.00388263	0	1	1	7	QHD43416.1_S2_RBD	QHD43416.1_S2_RBD [181-192]	0	1497.71	2.91966e+07		High	High	0	0.01003	3.51	48.52
		Checked	Confidence	Identifying Node	PSM Ambiguity	Annotated Sequence	Modifications	# Protein Groups	# Proteins	Master Protein Accessions	Protein Accessions	# Missed Cleavages	Charge	DeltaScore	DeltaCn	Rank	Search Engine Rank	m/z [Da]	MH+ [Da]	Theo. MH+ [Da]	DeltaM [ppm]	Deltam/z [Da]	Activation Type	MS Order	Isolation Interference [%]	Ion Inject Time [ms]	RT [min]	First Scan	Spectrum File	File ID	Quan Info	XCorr	Contaminant	Percolator q-Value	Percolator PEP	Precursor Abundance	Apex RT [min]
		TRUE	High	Sequest HT (A2)	Unambiguous	[W].nRKRISncVADY.[S]	N1(Deamidated); N7(Deamidated); C8(Carbamidomethyl)	1	1	QHD43416.1_S2_RBD	QHD43416.1_S2_RBD	0	3	0.6638	0	1	1	499.909	1497.71	1497.71	0.35	0.00018	ETD (Electron Transfer Dissociation)	MS2	34.9671	17.227	46.831	12208	200428_Lumos_(LC1200)_nanoFlex_Ieva_SARS_CoV2_i1_Chy_Chymo_90min_ETD_HCD_2ul.raw	F11		3.51	FALSE	0	0.01003	7.76929e+06	46.84
		TRUE	High	Sequest HT (A2)	Unambiguous	[W].nRKRISncVADY.[S]	N1(Deamidated); N7(Deamidated); C8(Carbamidomethyl)	1	1	QHD43416.1_S2_RBD	QHD43416.1_S2_RBD	0	3	0.6375	0	1	1	499.91	1497.71	1497.71	1.76	0.00088	ETD (Electron Transfer Dissociation)	MS2	54.4574	45.077	48.4394	12675	200428_Lumos_(LC1200)_nanoFlex_Ieva_SARS_CoV2_i1_Chy_Chymo_90min_ETD_HCD_2ul.raw	F11		3.31	FALSE	0	0.02992	12735594	48.52
		TRUE	High	Sequest HT (A2)	Unambiguous	[W].nRKRISncVADY.[S]	N1(Deamidated); N7(Deamidated); C8(Carbamidomethyl)	1	1	QHD43416.1_S2_RBD	QHD43416.1_S2_RBD	0	2	0.4203	0	1	1	749.361	1497.71	1497.71	1.81	0.00135	ETD (Electron Transfer Dissociation)	MS2	23.7326	28.449	48.522	12701	200428_Lumos_(LC1200)_nanoFlex_Ieva_SARS_CoV2_i1_Chy_Chymo_90min_ETD_HCD_2ul.raw	F11		2.07	FALSE	0	0.05488	8691728	48.5
		TRUE	High	Sequest HT (A16)	Unambiguous	[W].nRKRISncVADY.[S]	N1(Deamidated); N7(Deamidated); C8(Carbamidomethyl)	1	1	QHD43416.1_S2_RBD	QHD43416.1_S2_RBD	0	3	0.5145	0	1	1	499.909	1497.71	1497.71	0.35	0.00018	HCD (High Energy Collision Dissociation)	MS2	34.9671	25.528	46.8411	12210	200428_Lumos_(LC1200)_nanoFlex_Ieva_SARS_CoV2_i1_Chy_Chymo_90min_ETD_HCD_2ul.raw	F11		3.44	FALSE	0.0009362	0.0779	7.76929e+06	46.84
		TRUE	High	Sequest HT (A16)	Unambiguous	[W].nRKRISncVADY.[S]	N1(Deamidated); N7(Deamidated); C8(Carbamidomethyl)	1	1	QHD43416.1_S2_RBD	QHD43416.1_S2_RBD	0	3	0.5105	0	1	1	499.91	1497.71	1497.71	1.76	0.00088	HCD (High Energy Collision Dissociation)	MS2	54.4574	22.384	48.4508	12677	200428_Lumos_(LC1200)_nanoFlex_Ieva_SARS_CoV2_i1_Chy_Chymo_90min_ETD_HCD_2ul.raw	F11		3.33	FALSE	0.0009362	0.1428	12735594	48.52
		TRUE	Low	Sequest HT (A16)	Ambiguous	[W].nRKRISncVADY.[S]	N1(Deamidated); N7(Deamidated); C8(Carbamidomethyl)	1	1	QHD43416.1_S2_RBD	QHD43416.1_S2_RBD	0	2	0.4843	0	1	1	749.361	1497.71	1497.71	1.81	0.00135	HCD (High Energy Collision Dissociation)	MS2	23.7326	13.786	48.5324	12703	200428_Lumos_(LC1200)_nanoFlex_Ieva_SARS_CoV2_i1_Chy_Chymo_90min_ETD_HCD_2ul.raw	F11		1.59	FALSE	0.1839	0.7941	8691728	48.5
		TRUE	Low	Sequest HT (A18)	Ambiguous	[W].nRKRISncVADY.[S]	N1(Deamidated); N7(Deamidated); C8(Carbamidomethyl)	1	1	QHD43416.1_S2_RBD	QHD43416.1_S2_RBD	0	2	0.3082	0	1	1	749.361	1497.71	1497.71	1.81	0.00135	HCD (High Energy Collision Dissociation)	MS2	23.7326	13.786	48.5324	12703	200428_Lumos_(LC1200)_nanoFlex_Ieva_SARS_CoV2_i1_Chy_Chymo_90min_ETD_HCD_2ul.raw	F11		1.59	FALSE	0.8376	1	8691728	48.5
	TRUE	High	[W].NRKRISNCVADYSVL.[Y]	1xCarbamidomethyl [C8]		FALSE	0.00182155	0	1	1	5	QHD43416.1_S2_RBD	QHD43416.1_S2_RBD [181-195]	1	1794.93	45588876		High	High	0	0.004864	4.64	63.01
		Checked	Confidence	Identifying Node	PSM Ambiguity	Annotated Sequence	Modifications	# Protein Groups	# Proteins	Master Protein Accessions	Protein Accessions	# Missed Cleavages	Charge	DeltaScore	DeltaCn	Rank	Search Engine Rank	m/z [Da]	MH+ [Da]	Theo. MH+ [Da]	DeltaM [ppm]	Deltam/z [Da]	Activation Type	MS Order	Isolation Interference [%]	Ion Inject Time [ms]	RT [min]	First Scan	Spectrum File	File ID	Quan Info	XCorr	Contaminant	Percolator q-Value	Percolator PEP	Precursor Abundance	Apex RT [min]
		TRUE	Low	Sequest HT (A2)	Ambiguous	[W].NRKRISNcVADYSVL.[Y]	C8(Carbamidomethyl)	1	1	QHD43416.1_S2_RBD	QHD43416.1_S2_RBD	1	3	0.2663	0	1	1	598.981	1794.93	1794.93	0.42	0.00025	ETD (Electron Transfer Dissociation)	MS2	60.8501	5.979	63.0183	17030	200428_Lumos_(LC1200)_nanoFlex_Ieva_SARS_CoV2_i1_Chy_Chymo_90min_ETD_HCD_2ul.raw	F11		1.69	FALSE	0.879	1	23762978	63.01
		TRUE	High	Sequest HT (A2)	Unambiguous	[W].NRKRISNcVADYSVL.[Y]	C8(Carbamidomethyl)	1	1	QHD43416.1_S2_RBD	QHD43416.1_S2_RBD	1	3	0.5366	0	1	1	598.981	1794.93	1794.93	0.93	0.00056	ETD (Electron Transfer Dissociation)	MS2	27.5157	16.22	66.4768	18122	200428_Lumos_(LC1200)_nanoFlex_Ieva_SARS_CoV2_i1_Chy_Chymo_90min_ETD_HCD_2ul.raw	F11		4.64	FALSE	0	0.004864	21825898	66.49
		TRUE	Low	Sequest HT (A14)	Ambiguous	[W].NRKRISNcVADYSVL.[Y]	C8(Carbamidomethyl)	1	1	QHD43416.1_S2_RBD	QHD43416.1_S2_RBD	1	3	0.0592	0	1	1	598.981	1794.93	1794.93	0.42	0.00025	ETD (Electron Transfer Dissociation)	MS2	60.8501	5.979	63.0183	17030	200428_Lumos_(LC1200)_nanoFlex_Ieva_SARS_CoV2_i1_Chy_Chymo_90min_ETD_HCD_2ul.raw	F11		1.69	FALSE	0.7782	1	23762978	63.01
		TRUE	Low	Sequest HT (A16)	Ambiguous	[W].NRKRISNcVADYSVL.[Y]	C8(Carbamidomethyl)	1	1	QHD43416.1_S2_RBD	QHD43416.1_S2_RBD	1	3	0.4392	0	1	1	598.981	1794.93	1794.93	0.93	0.00056	HCD (High Energy Collision Dissociation)	MS2	27.5157	5.145	66.4871	18124	200428_Lumos_(LC1200)_nanoFlex_Ieva_SARS_CoV2_i1_Chy_Chymo_90min_ETD_HCD_2ul.raw	F11		1.89	FALSE	0.05139	0.5737	21825898	66.49
		TRUE	Low	Sequest HT (A18)	Ambiguous	[W].NRKRISNcVADYSVL.[Y]	C8(Carbamidomethyl)	1	1	QHD43416.1_S2_RBD	QHD43416.1_S2_RBD	1	3	0.4392	0	1	1	598.981	1794.93	1794.93	0.93	0.00056	HCD (High Energy Collision Dissociation)	MS2	27.5157	5.145	66.4871	18124	200428_Lumos_(LC1200)_nanoFlex_Ieva_SARS_CoV2_i1_Chy_Chymo_90min_ETD_HCD_2ul.raw	F11		1.89	FALSE	0.2219	0.7758	21825898	66.49
	TRUE	High	[W].NRKRISNCVADYSVLY.[N]	1xCarbamidomethyl [C8]		FALSE	0.00146368	0	1	1	5	QHD43416.1_S2_RBD	QHD43416.1_S2_RBD [181-196]	2	1957.99	33961284		High	High	0	0.00395	3.65	72.98
		Checked	Confidence	Identifying Node	PSM Ambiguity	Annotated Sequence	Modifications	# Protein Groups	# Proteins	Master Protein Accessions	Protein Accessions	# Missed Cleavages	Charge	DeltaScore	DeltaCn	Rank	Search Engine Rank	m/z [Da]	MH+ [Da]	Theo. MH+ [Da]	DeltaM [ppm]	Deltam/z [Da]	Activation Type	MS Order	Isolation Interference [%]	Ion Inject Time [ms]	RT [min]	First Scan	Spectrum File	File ID	Quan Info	XCorr	Contaminant	Percolator q-Value	Percolator PEP	Precursor Abundance	Apex RT [min]
		TRUE	High	Sequest HT (A2)	Unambiguous	[W].NRKRISNcVADYSVLY.[N]	C8(Carbamidomethyl)	1	1	QHD43416.1_S2_RBD	QHD43416.1_S2_RBD	2	3	0.6192	0	1	1	653.335	1957.99	1957.99	0.28	0.00018	ETD (Electron Transfer Dissociation)	MS2	37.5862	9.098	73.0301	20184	200428_Lumos_(LC1200)_nanoFlex_Ieva_SARS_CoV2_i1_Chy_Chymo_90min_ETD_HCD_2ul.raw	F11		3.65	FALSE	0	0.00395	33961284	72.98
		TRUE	High	Sequest HT (A2)	Unambiguous	[W].NRKRISNcVADYSVLY.[N]	C8(Carbamidomethyl)	1	1	QHD43416.1_S2_RBD	QHD43416.1_S2_RBD	2	2	0.5312	0	1	1	979.499	1957.99	1957.99	0.13	0.00012	ETD (Electron Transfer Dissociation)	MS2	0	14.596	73.0944	20205	200428_Lumos_(LC1200)_nanoFlex_Ieva_SARS_CoV2_i1_Chy_Chymo_90min_ETD_HCD_2ul.raw	F11		2.24	FALSE	0	0.01608	30844072	73.06
		TRUE	High	Sequest HT (A16)	Unambiguous	[W].NRKRISNcVADYSVLY.[N]	C8(Carbamidomethyl)	1	1	QHD43416.1_S2_RBD	QHD43416.1_S2_RBD	2	3	0.504	0	1	1	653.335	1957.99	1957.99	0.28	0.00018	HCD (High Energy Collision Dissociation)	MS2	37.5862	4.751	73.0395	20187	200428_Lumos_(LC1200)_nanoFlex_Ieva_SARS_CoV2_i1_Chy_Chymo_90min_ETD_HCD_2ul.raw	F11		2.5	FALSE	0.0009362	0.104	33961284	72.98
		TRUE	Low	Sequest HT (A16)	Ambiguous	[W].NRKRISNcVADYSVLY.[N]	C8(Carbamidomethyl)	1	1	QHD43416.1_S2_RBD	QHD43416.1_S2_RBD	2	2	0.3383	0	1	1	979.499	1957.99	1957.99	0.13	0.00012	HCD (High Energy Collision Dissociation)	MS2	0	11.068	73.1036	20207	200428_Lumos_(LC1200)_nanoFlex_Ieva_SARS_CoV2_i1_Chy_Chymo_90min_ETD_HCD_2ul.raw	F11		1.33	FALSE	0.1442	0.7553
		TRUE	Low	Sequest HT (A18)	Ambiguous	[W].NRKRISNcVADYSVLY.[N]	C8(Carbamidomethyl)	1	1	QHD43416.1_S2_RBD	QHD43416.1_S2_RBD	2	2	0.3083	0	1	1	979.499	1957.99	1957.99	0.13	0.00012	HCD (High Energy Collision Dissociation)	MS2	0	11.068	73.1036	20207	200428_Lumos_(LC1200)_nanoFlex_Ieva_SARS_CoV2_i1_Chy_Chymo_90min_ETD_HCD_2ul.raw	F11		1.33	FALSE	0.8383	1
	TRUE	High	[W].NSNNLDSKVG.[G]			FALSE	0.0941847	0.00936225	1	1	2	QHD43416.1_S2_RBD	QHD43416.1_S2_RBD [264-273]	1	1047.51	48630956		High	High	0.003676	0.1125	3.13	33.97
		Checked	Confidence	Identifying Node	PSM Ambiguity	Annotated Sequence	Modifications	# Protein Groups	# Proteins	Master Protein Accessions	Protein Accessions	# Missed Cleavages	Charge	DeltaScore	DeltaCn	Rank	Search Engine Rank	m/z [Da]	MH+ [Da]	Theo. MH+ [Da]	DeltaM [ppm]	Deltam/z [Da]	Activation Type	MS Order	Isolation Interference [%]	Ion Inject Time [ms]	RT [min]	First Scan	Spectrum File	File ID	Quan Info	XCorr	Contaminant	Percolator q-Value	Percolator PEP	Precursor Abundance	Apex RT [min]
		TRUE	High	Sequest HT (A14)	Ambiguous	[W].NSNNLDSKVG.[G]		1	1	QHD43416.1_S2_RBD	QHD43416.1_S2_RBD	1	2	0.6337	0	1	1	524.258	1047.51	1047.51	1.27	0.00067	ETD (Electron Transfer Dissociation)	MS2	7.04102	9.756	33.9799	8639	200428_Lumos_(LC1200)_nanoFlex_Ieva_SARS_CoV2_i1_Chy_Chymo_90min_ETD_HCD_2ul.raw	F11		2.73	FALSE	0	0.1755	48630956	33.97
		TRUE	High	Sequest HT (A18)	Ambiguous	[W].NSNNLDSKVG.[G]		1	1	QHD43416.1_S2_RBD	QHD43416.1_S2_RBD	1	2	0.5399	0	1	1	524.258	1047.51	1047.51	1.27	0.00067	HCD (High Energy Collision Dissociation)	MS2	7.04102	3.904	33.9893	8641	200428_Lumos_(LC1200)_nanoFlex_Ieva_SARS_CoV2_i1_Chy_Chymo_90min_ETD_HCD_2ul.raw	F11		3.13	FALSE	0.003676	0.1125	48630956	33.97
	TRUE	High	[W].NSNNLDSKVGGN.[Y]			FALSE	0.0103343	0	1	1	2	QHD43416.1_S2_RBD	QHD43416.1_S2_RBD [264-275]	1	1218.57	44417868		High	High	0	0.01434	3.67	35.49
		Checked	Confidence	Identifying Node	PSM Ambiguity	Annotated Sequence	Modifications	# Protein Groups	# Proteins	Master Protein Accessions	Protein Accessions	# Missed Cleavages	Charge	DeltaScore	DeltaCn	Rank	Search Engine Rank	m/z [Da]	MH+ [Da]	Theo. MH+ [Da]	DeltaM [ppm]	Deltam/z [Da]	Activation Type	MS Order	Isolation Interference [%]	Ion Inject Time [ms]	RT [min]	First Scan	Spectrum File	File ID	Quan Info	XCorr	Contaminant	Percolator q-Value	Percolator PEP	Precursor Abundance	Apex RT [min]
		TRUE	High	Sequest HT (A14)	Ambiguous	[W].NSNNLDSKVGGN.[Y]		1	1	QHD43416.1_S2_RBD	QHD43416.1_S2_RBD	1	2	0.6703	0	1	1	609.789	1218.57	1218.57	0.04	3e-05	ETD (Electron Transfer Dissociation)	MS2	0	25.497	35.3892	9016	200428_Lumos_(LC1200)_nanoFlex_Ieva_SARS_CoV2_i1_Chy_Chymo_90min_ETD_HCD_2ul.raw	F11		3.67	FALSE	0	0.01434	44417868	35.49
		TRUE	High	Sequest HT (A18)	Ambiguous	[W].NSNNLDSKVGGN.[Y]		1	1	QHD43416.1_S2_RBD	QHD43416.1_S2_RBD	1	2	0.6123	0	1	1	609.789	1218.57	1218.57	0.04	3e-05	HCD (High Energy Collision Dissociation)	MS2	0	8.895	35.3989	9017	200428_Lumos_(LC1200)_nanoFlex_Ieva_SARS_CoV2_i1_Chy_Chymo_90min_ETD_HCD_2ul.raw	F11		3.25	FALSE	0	0.01861	44417868	35.49
	TRUE	High	[W].NSNNLDSKVGGNY.[N]			FALSE	8.59656e-05	0	1	1	89	QHD43416.1_S2_RBD	QHD43416.1_S2_RBD [264-276]	1	1381.63	1.14663e+10		High	High	0	0.001147	4.39	54.08
		Checked	Confidence	Identifying Node	PSM Ambiguity	Annotated Sequence	Modifications	# Protein Groups	# Proteins	Master Protein Accessions	Protein Accessions	# Missed Cleavages	Charge	DeltaScore	DeltaCn	Rank	Search Engine Rank	m/z [Da]	MH+ [Da]	Theo. MH+ [Da]	DeltaM [ppm]	Deltam/z [Da]	Activation Type	MS Order	Isolation Interference [%]	Ion Inject Time [ms]	RT [min]	First Scan	Spectrum File	File ID	Quan Info	XCorr	Contaminant	Percolator q-Value	Percolator PEP	Precursor Abundance	Apex RT [min]
		TRUE	High	Sequest HT (A2)	Unambiguous	[W].NSNNLDSKVGGNY.[N]		1	1	QHD43416.1_S2_RBD	QHD43416.1_S2_RBD	1	3	0.6993	0	1	1	461.217	1381.64	1381.63	0.89	0.00041	ETD (Electron Transfer Dissociation)	MS2	15.9363	35.093	44.8988	11649	200428_Lumos_(LC1200)_nanoFlex_Ieva_SARS_CoV2_i1_Chy_Chymo_90min_ETD_HCD_2ul.raw	F11		4.39	FALSE	0	0.001147	5113171	44.85
		TRUE	High	Sequest HT (A2)	Unambiguous	[W].NSNNLDSKVGGNY.[N]		1	1	QHD43416.1_S2_RBD	QHD43416.1_S2_RBD	1	2	0.6507	0	1	1	691.321	1381.63	1381.63	0.41	0.00028	ETD (Electron Transfer Dissociation)	MS2	31.477	23.716	44.9342	11659	200428_Lumos_(LC1200)_nanoFlex_Ieva_SARS_CoV2_i1_Chy_Chymo_90min_ETD_HCD_2ul.raw	F11		2.29	FALSE	0	0.05862	3.70318e+06	44.86
		TRUE	High	Sequest HT (A2)	Unambiguous	[W].NSNNLDSKVGGNY.[N]		1	1	QHD43416.1_S2_RBD	QHD43416.1_S2_RBD	1	2	0.7218	0	1	1	691.321	1381.63	1381.63	0.14	0.0001	ETD (Electron Transfer Dissociation)	MS2	7.04865	12.51	51.7271	13643	200428_Lumos_(LC1200)_nanoFlex_Ieva_SARS_CoV2_i1_Chy_Chymo_90min_ETD_HCD_2ul.raw	F11		3.81	FALSE	0	0.00511	378244992	51.85
		TRUE	High	Sequest HT (A2)	Unambiguous	[W].NSNNLDSKVGGNY.[N]		1	1	QHD43416.1_S2_RBD	QHD43416.1_S2_RBD	1	2	0.7449	0	1	1	691.321	1381.63	1381.63	0.14	0.0001	ETD (Electron Transfer Dissociation)	MS2	16.4947	16.725	52.1101	13752	200428_Lumos_(LC1200)_nanoFlex_Ieva_SARS_CoV2_i1_Chy_Chymo_90min_ETD_HCD_2ul.raw	F11		3.96	FALSE	0	0.0009252	378244992	51.85
		TRUE	High	Sequest HT (A2)	Unambiguous	[W].NSNNLDSKVGGNY.[N]		1	1	QHD43416.1_S2_RBD	QHD43416.1_S2_RBD	1	2	0.7379	0	1	1	691.321	1381.63	1381.63	0.06	4e-05	ETD (Electron Transfer Dissociation)	MS2	3.02963	6.275	52.4887	13862	200428_Lumos_(LC1200)_nanoFlex_Ieva_SARS_CoV2_i1_Chy_Chymo_90min_ETD_HCD_2ul.raw	F11		3.51	FALSE	0	0.001025	49607416	52.51
		TRUE	High	Sequest HT (A2)	Unambiguous	[W].NSNNLDSKVGGNY.[N]		1	1	QHD43416.1_S2_RBD	QHD43416.1_S2_RBD	1	2	0.7299	0	1	1	691.321	1381.63	1381.63	0.5	0.00034	ETD (Electron Transfer Dissociation)	MS2	0	5.695	53.4108	14126	200428_Lumos_(LC1200)_nanoFlex_Ieva_SARS_CoV2_i1_Chy_Chymo_90min_ETD_HCD_2ul.raw	F11		2.74	FALSE	0	0.03443	10996945920	54.08
		TRUE	High	Sequest HT (A2)	Unambiguous	[W].NSNNLDSKVGGNY.[N]		1	1	QHD43416.1_S2_RBD	QHD43416.1_S2_RBD	1	2	0.7354	0	1	1	691.321	1381.64	1381.63	0.94	0.00065	ETD (Electron Transfer Dissociation)	MS2	0.154719	0.124	53.7457	14233	200428_Lumos_(LC1200)_nanoFlex_Ieva_SARS_CoV2_i1_Chy_Chymo_90min_ETD_HCD_2ul.raw	F11		3.59	FALSE	0	0.001187	10996945920	54.08
		TRUE	High	Sequest HT (A2)	Unambiguous	[W].NSNNLDSKVGGNY.[N]		1	1	QHD43416.1_S2_RBD	QHD43416.1_S2_RBD	1	2	0.742	0	1	1	691.321	1381.64	1381.63	0.67	0.00047	ETD (Electron Transfer Dissociation)	MS2	0	0.073	54.0902	14322	200428_Lumos_(LC1200)_nanoFlex_Ieva_SARS_CoV2_i1_Chy_Chymo_90min_ETD_HCD_2ul.raw	F11		3.76	FALSE	0	0.002025	10996945920	54.08
		TRUE	High	Sequest HT (A2)	Unambiguous	[W].NSNNLDSKVGGNY.[N]		1	1	QHD43416.1_S2_RBD	QHD43416.1_S2_RBD	1	2	0.7187	0	1	1	691.321	1381.64	1381.63	0.76	0.00053	ETD (Electron Transfer Dissociation)	MS2	0	0.108	54.4282	14417	200428_Lumos_(LC1200)_nanoFlex_Ieva_SARS_CoV2_i1_Chy_Chymo_90min_ETD_HCD_2ul.raw	F11		3.27	FALSE	0	0.002112	10996945920	54.08
		TRUE	High	Sequest HT (A2)	Unambiguous	[W].NSNNLDSKVGGNY.[N]		1	1	QHD43416.1_S2_RBD	QHD43416.1_S2_RBD	1	2	0.7367	0	1	1	691.322	1381.64	1381.63	1.2	0.00083	ETD (Electron Transfer Dissociation)	MS2	0	0.147	54.7761	14515	200428_Lumos_(LC1200)_nanoFlex_Ieva_SARS_CoV2_i1_Chy_Chymo_90min_ETD_HCD_2ul.raw	F11		3.57	FALSE	0	0.002715	10996945920	54.08
		TRUE	High	Sequest HT (A2)	Unambiguous	[W].NSNNLDSKVGGNY.[N]		1	1	QHD43416.1_S2_RBD	QHD43416.1_S2_RBD	1	2	0.7386	0	1	1	691.321	1381.64	1381.63	0.94	0.00065	ETD (Electron Transfer Dissociation)	MS2	0.0764142	0.15	55.1246	14613	200428_Lumos_(LC1200)_nanoFlex_Ieva_SARS_CoV2_i1_Chy_Chymo_90min_ETD_HCD_2ul.raw	F11		3.52	FALSE	0	0.005391	10996945920	54.08
		TRUE	High	Sequest HT (A2)	Unambiguous	[W].NSNNLDSKVGGNY.[N]		1	1	QHD43416.1_S2_RBD	QHD43416.1_S2_RBD	1	2	0.7428	0	1	1	691.322	1381.64	1381.63	1.74	0.0012	ETD (Electron Transfer Dissociation)	MS2	0.330596	0.26	55.4978	14720	200428_Lumos_(LC1200)_nanoFlex_Ieva_SARS_CoV2_i1_Chy_Chymo_90min_ETD_HCD_2ul.raw	F11		3.46	FALSE	0	0.001672	10996945920	54.08
		TRUE	High	Sequest HT (A2)	Unambiguous	[W].NSNNLDSKVGGNY.[N]		1	1	QHD43416.1_S2_RBD	QHD43416.1_S2_RBD	1	2	0.7413	0	1	1	691.322	1381.64	1381.63	1.29	0.00089	ETD (Electron Transfer Dissociation)	MS2	0.944714	1.141	55.886	14842	200428_Lumos_(LC1200)_nanoFlex_Ieva_SARS_CoV2_i1_Chy_Chymo_90min_ETD_HCD_2ul.raw	F11		3.44	FALSE	0	0.001623	10996945920	54.08
		TRUE	High	Sequest HT (A2)	Unambiguous	[W].NSNNLDSKVGGNY.[N]		1	1	QHD43416.1_S2_RBD	QHD43416.1_S2_RBD	1	2	0.7211	0	1	1	691.321	1381.64	1381.63	0.59	0.00041	ETD (Electron Transfer Dissociation)	MS2	2.9171	3.813	56.2501	14952	200428_Lumos_(LC1200)_nanoFlex_Ieva_SARS_CoV2_i1_Chy_Chymo_90min_ETD_HCD_2ul.raw	F11		3.55	FALSE	0	0.004578	10996945920	54.08
		TRUE	High	Sequest HT (A2)	Unambiguous	[W].NSNNLDSKVGGNY.[N]		1	1	QHD43416.1_S2_RBD	QHD43416.1_S2_RBD	1	2	0.7249	0	1	1	691.321	1381.63	1381.63	0.14	0.0001	ETD (Electron Transfer Dissociation)	MS2	2.74475	3.358	56.6394	15073	200428_Lumos_(LC1200)_nanoFlex_Ieva_SARS_CoV2_i1_Chy_Chymo_90min_ETD_HCD_2ul.raw	F11		3.49	FALSE	0	0.004336
		TRUE	High	Sequest HT (A2)	Unambiguous	[W].NSNNLDSKVGGNY.[N]		1	1	QHD43416.1_S2_RBD	QHD43416.1_S2_RBD	1	2	0.723	0	1	1	691.321	1381.64	1381.63	0.76	0.00053	ETD (Electron Transfer Dissociation)	MS2	5.39285	8.014	56.9848	15176	200428_Lumos_(LC1200)_nanoFlex_Ieva_SARS_CoV2_i1_Chy_Chymo_90min_ETD_HCD_2ul.raw	F11		3.43	FALSE	0	0.004991
		TRUE	High	Sequest HT (A2)	Unambiguous	[W].NSNNLDSKVGGNY.[N]		1	1	QHD43416.1_S2_RBD	QHD43416.1_S2_RBD	1	2	0.7459	0	1	1	691.321	1381.63	1381.63	0.5	0.00034	ETD (Electron Transfer Dissociation)	MS2	0	6.791	57.3394	15291	200428_Lumos_(LC1200)_nanoFlex_Ieva_SARS_CoV2_i1_Chy_Chymo_90min_ETD_HCD_2ul.raw	F11		3.07	FALSE	0	0.002258
		TRUE	High	Sequest HT (A2)	Unambiguous	[W].NSNNLDSKVGGNY.[N]		1	1	QHD43416.1_S2_RBD	QHD43416.1_S2_RBD	1	2	0.7806	0	1	1	691.321	1381.63	1381.63	0.5	0.00034	ETD (Electron Transfer Dissociation)	MS2	13.4479	6.874	57.6998	15406	200428_Lumos_(LC1200)_nanoFlex_Ieva_SARS_CoV2_i1_Chy_Chymo_90min_ETD_HCD_2ul.raw	F11		3.19	FALSE	0	0.002643
		TRUE	High	Sequest HT (A2)	Unambiguous	[W].NSNNLDSKVGGNY.[N]		1	1	QHD43416.1_S2_RBD	QHD43416.1_S2_RBD	1	2	0.655	0	1	1	691.321	1381.63	1381.63	0.5	0.00034	ETD (Electron Transfer Dissociation)	MS2	80.1248	2.372	58.9386	15785	200428_Lumos_(LC1200)_nanoFlex_Ieva_SARS_CoV2_i1_Chy_Chymo_90min_ETD_HCD_2ul.raw	F11		2.29	FALSE	0	0.007779
		TRUE	High	Sequest HT (A2)	Unambiguous	[W].NSNNLDSKVGGNY.[N]		1	1	QHD43416.1_S2_RBD	QHD43416.1_S2_RBD	1	2	0.6931	0	1	1	691.321	1381.64	1381.63	1.03	0.00071	ETD (Electron Transfer Dissociation)	MS2	26.8223	7.454	59.7812	16047	200428_Lumos_(LC1200)_nanoFlex_Ieva_SARS_CoV2_i1_Chy_Chymo_90min_ETD_HCD_2ul.raw	F11		2.9	FALSE	0	0.01161
		TRUE	High	Sequest HT (A2)	Unambiguous	[W].NSNNLDSKVGGNY.[N]		1	1	QHD43416.1_S2_RBD	QHD43416.1_S2_RBD	1	2	0.7024	0	1	1	691.322	1381.64	1381.63	1.12	0.00077	ETD (Electron Transfer Dissociation)	MS2	19.2841	7.921	60.1572	16157	200428_Lumos_(LC1200)_nanoFlex_Ieva_SARS_CoV2_i1_Chy_Chymo_90min_ETD_HCD_2ul.raw	F11		2.89	FALSE	0	0.0112
		TRUE	High	Sequest HT (A2)	Unambiguous	[W].NSNNLDSKVGGNY.[N]		1	1	QHD43416.1_S2_RBD	QHD43416.1_S2_RBD	1	2	0.7188	0	1	1	691.321	1381.64	1381.63	0.67	0.00047	ETD (Electron Transfer Dissociation)	MS2	3.90708	8.67	60.5405	16278	200428_Lumos_(LC1200)_nanoFlex_Ieva_SARS_CoV2_i1_Chy_Chymo_90min_ETD_HCD_2ul.raw	F11		3.45	FALSE	0	0.002417
		TRUE	High	Sequest HT (A2)	Unambiguous	[W].NSNNLDSKVGGNY.[N]		1	1	QHD43416.1_S2_RBD	QHD43416.1_S2_RBD	1	2	0.7258	0	1	1	691.321	1381.64	1381.63	0.67	0.00047	ETD (Electron Transfer Dissociation)	MS2	18.7522	9.561	60.9144	16388	200428_Lumos_(LC1200)_nanoFlex_Ieva_SARS_CoV2_i1_Chy_Chymo_90min_ETD_HCD_2ul.raw	F11		3.1	FALSE	0	0.002369
		TRUE	High	Sequest HT (A2)	Unambiguous	[W].NSNNLDSKVGGNY.[N]		1	1	QHD43416.1_S2_RBD	QHD43416.1_S2_RBD	1	2	0.7267	0	1	1	691.321	1381.63	1381.63	0.41	0.00028	ETD (Electron Transfer Dissociation)	MS2	10.4867	8.642	61.4125	16535	200428_Lumos_(LC1200)_nanoFlex_Ieva_SARS_CoV2_i1_Chy_Chymo_90min_ETD_HCD_2ul.raw	F11		3.44	FALSE	0	0.005609
		TRUE	High	Sequest HT (A2)	Unambiguous	[W].NSNNLDSKVGGNY.[N]		1	1	QHD43416.1_S2_RBD	QHD43416.1_S2_RBD	1	2	0.7774	0	1	1	691.321	1381.63	1381.63	0.06	4e-05	ETD (Electron Transfer Dissociation)	MS2	45.39	9.294	61.8208	16664	200428_Lumos_(LC1200)_nanoFlex_Ieva_SARS_CoV2_i1_Chy_Chymo_90min_ETD_HCD_2ul.raw	F11		3.1	FALSE	0	0.002287
		TRUE	High	Sequest HT (A2)	Unambiguous	[W].NSNNLDSKVGGNY.[N]		1	1	QHD43416.1_S2_RBD	QHD43416.1_S2_RBD	1	2	0.6923	0	1	1	691.321	1381.63	1381.63	-0.21	-0.00014	ETD (Electron Transfer Dissociation)	MS2	25.9169	12.781	62.7917	16960	200428_Lumos_(LC1200)_nanoFlex_Ieva_SARS_CoV2_i1_Chy_Chymo_90min_ETD_HCD_2ul.raw	F11		3.12	FALSE	0	0.002084	19556176	63.24
		TRUE	High	Sequest HT (A2)	Unambiguous	[W].NSNNLDSKVGGNY.[N]		1	1	QHD43416.1_S2_RBD	QHD43416.1_S2_RBD	1	2	0.7299	0	1	1	691.322	1381.64	1381.63	1.2	0.00083	ETD (Electron Transfer Dissociation)	MS2	68.0055	10.414	63.1756	17082	200428_Lumos_(LC1200)_nanoFlex_Ieva_SARS_CoV2_i1_Chy_Chymo_90min_ETD_HCD_2ul.raw	F11		3.11	FALSE	0	0.00391	19556176	63.24
		TRUE	High	Sequest HT (A2)	Unambiguous	[W].NSNNLDSKVGGNY.[N]		1	1	QHD43416.1_S2_RBD	QHD43416.1_S2_RBD	1	2	0.7215	0	1	1	691.321	1381.63	1381.63	0.5	0.00034	ETD (Electron Transfer Dissociation)	MS2	45.9782	9.454	63.6862	17237	200428_Lumos_(LC1200)_nanoFlex_Ieva_SARS_CoV2_i1_Chy_Chymo_90min_ETD_HCD_2ul.raw	F11		3.77	FALSE	0	0.0009634	19556176	63.24
		TRUE	High	Sequest HT (A2)	Unambiguous	[W].NSNNLDSKVGGNY.[N]		1	1	QHD43416.1_S2_RBD	QHD43416.1_S2_RBD	1	2	0.75	0	1	1	691.321	1381.63	1381.63	-0.03	-2e-05	ETD (Electron Transfer Dissociation)	MS2	58.7982	7.047	64.065	17357	200428_Lumos_(LC1200)_nanoFlex_Ieva_SARS_CoV2_i1_Chy_Chymo_90min_ETD_HCD_2ul.raw	F11		2.92	FALSE	0	0.004369	19556176	63.24
		TRUE	High	Sequest HT (A2)	Unambiguous	[W].NSNNLDSKVGGNY.[N]		1	1	QHD43416.1_S2_RBD	QHD43416.1_S2_RBD	1	2	0.7139	0	1	1	691.321	1381.63	1381.63	-0.03	-2e-05	ETD (Electron Transfer Dissociation)	MS2	17.8302	9.851	64.426	17475	200428_Lumos_(LC1200)_nanoFlex_Ieva_SARS_CoV2_i1_Chy_Chymo_90min_ETD_HCD_2ul.raw	F11		3.46	FALSE	0	0.001551	19556176	63.24
		TRUE	High	Sequest HT (A2)	Unambiguous	[W].NSNNLDSKVGGNY.[N]		1	1	QHD43416.1_S2_RBD	QHD43416.1_S2_RBD	1	2	0.6718	0	1	1	691.321	1381.63	1381.63	0.14	0.0001	ETD (Electron Transfer Dissociation)	MS2	45.6287	8.401	65.4079	17777	200428_Lumos_(LC1200)_nanoFlex_Ieva_SARS_CoV2_i1_Chy_Chymo_90min_ETD_HCD_2ul.raw	F11		3.26	FALSE	0	0.005226	14968111	65.05
		TRUE	High	Sequest HT (A2)	Unambiguous	[W].NSNNLDSKVGGNY.[N]		1	1	QHD43416.1_S2_RBD	QHD43416.1_S2_RBD	1	2	0.7077	0	1	1	691.321	1381.63	1381.63	0.14	0.0001	ETD (Electron Transfer Dissociation)	MS2	32.7314	8.702	65.804	17902	200428_Lumos_(LC1200)_nanoFlex_Ieva_SARS_CoV2_i1_Chy_Chymo_90min_ETD_HCD_2ul.raw	F11		3.49	FALSE	0	0.001413	14968111	65.05
		TRUE	High	Sequest HT (A2)	Unambiguous	[W].NSNNLDSKVGGNY.[N]		1	1	QHD43416.1_S2_RBD	QHD43416.1_S2_RBD	1	2	0.7108	0	1	1	691.321	1381.63	1381.63	-0.21	-0.00014	ETD (Electron Transfer Dissociation)	MS2	13.2287	11.19	66.299	18063	200428_Lumos_(LC1200)_nanoFlex_Ieva_SARS_CoV2_i1_Chy_Chymo_90min_ETD_HCD_2ul.raw	F11		3.32	FALSE	0	0.005649
		TRUE	High	Sequest HT (A2)	Unambiguous	[W].NSNNLDSKVGGNY.[N]		1	1	QHD43416.1_S2_RBD	QHD43416.1_S2_RBD	1	2	0.695	0	1	1	691.321	1381.63	1381.63	-0.21	-0.00014	ETD (Electron Transfer Dissociation)	MS2	0	23.067	66.6558	18179	200428_Lumos_(LC1200)_nanoFlex_Ieva_SARS_CoV2_i1_Chy_Chymo_90min_ETD_HCD_2ul.raw	F11		3.41	FALSE	0	0.005002
		TRUE	High	Sequest HT (A2)	Unambiguous	[W].NSNNLDSKVGGNY.[N]		1	1	QHD43416.1_S2_RBD	QHD43416.1_S2_RBD	1	2	0.6825	0	1	1	691.321	1381.63	1381.63	0.32	0.00022	ETD (Electron Transfer Dissociation)	MS2	42.45	10.916	68.5223	18770	200428_Lumos_(LC1200)_nanoFlex_Ieva_SARS_CoV2_i1_Chy_Chymo_90min_ETD_HCD_2ul.raw	F11		2.52	FALSE	0	0.01352	8209169	69.13
		TRUE	High	Sequest HT (A2)	Unambiguous	[W].NSNNLDSKVGGNY.[N]		1	1	QHD43416.1_S2_RBD	QHD43416.1_S2_RBD	1	2	0.7461	0	1	1	691.322	1381.64	1381.63	2.27	0.00156	ETD (Electron Transfer Dissociation)	MS2	23.8103	27.12	68.9859	18919	200428_Lumos_(LC1200)_nanoFlex_Ieva_SARS_CoV2_i1_Chy_Chymo_90min_ETD_HCD_2ul.raw	F11		3.19	FALSE	0	0.006634	8209169	69.13
		TRUE	High	Sequest HT (A2)	Unambiguous	[W].NSNNLDSKVGGNY.[N]		1	1	QHD43416.1_S2_RBD	QHD43416.1_S2_RBD	1	2	0.7158	0	1	1	691.322	1381.64	1381.63	1.12	0.00077	ETD (Electron Transfer Dissociation)	MS2	60.652	20.079	69.4042	19051	200428_Lumos_(LC1200)_nanoFlex_Ieva_SARS_CoV2_i1_Chy_Chymo_90min_ETD_HCD_2ul.raw	F11		3.73	FALSE	0	0.001298	8209169	69.13
		TRUE	High	Sequest HT (A2)	Unambiguous	[W].NSNNLDSKVGGNY.[N]		1	1	QHD43416.1_S2_RBD	QHD43416.1_S2_RBD	1	2	0.7019	0	1	1	691.321	1381.63	1381.63	0.32	0.00022	ETD (Electron Transfer Dissociation)	MS2	77.4587	21.682	70.3282	19351	200428_Lumos_(LC1200)_nanoFlex_Ieva_SARS_CoV2_i1_Chy_Chymo_90min_ETD_HCD_2ul.raw	F11		3.12	FALSE	0	0.002757	8209169	69.13
		TRUE	High	Sequest HT (A2)	Unambiguous	[W].NSNNLDSKVGGNY.[N]		1	1	QHD43416.1_S2_RBD	QHD43416.1_S2_RBD	1	2	0.7339	0	1	1	691.319	1381.63	1381.63	-2.51	-0.00173	ETD (Electron Transfer Dissociation)	MS2	34.0632	12.682	72.5544	20031	200428_Lumos_(LC1200)_nanoFlex_Ieva_SARS_CoV2_i1_Chy_Chymo_90min_ETD_HCD_2ul.raw	F11		3.42	FALSE	0	0.005123	5.93917e+06	72.53
		TRUE	High	Sequest HT (A2)	Unambiguous	[W].NSNNLDSKVGGNY.[N]		1	1	QHD43416.1_S2_RBD	QHD43416.1_S2_RBD	1	2	0.6837	0	1	1	691.321	1381.63	1381.63	-0.39	-0.00027	ETD (Electron Transfer Dissociation)	MS2	39.0683	16.07	75.4087	20930	200428_Lumos_(LC1200)_nanoFlex_Ieva_SARS_CoV2_i1_Chy_Chymo_90min_ETD_HCD_2ul.raw	F11		2.94	FALSE	0	0.005114
		TRUE	High	Sequest HT (A2)	Unambiguous	[W].NSNNLDSKVGGNY.[N]		1	1	QHD43416.1_S2_RBD	QHD43416.1_S2_RBD	1	2	0.7034	0	1	1	691.32	1381.63	1381.63	-1.53	-0.00106	ETD (Electron Transfer Dissociation)	MS2	37.8047	17.162	76.9787	21435	200428_Lumos_(LC1200)_nanoFlex_Ieva_SARS_CoV2_i1_Chy_Chymo_90min_ETD_HCD_2ul.raw	F11		2.9	FALSE	0	0.006375
		TRUE	High	Sequest HT (A2)	Unambiguous	[W].NSNNLDSKVGGNY.[N]		1	1	QHD43416.1_S2_RBD	QHD43416.1_S2_RBD	1	2	0.7105	0	1	1	691.321	1381.63	1381.63	0.14	0.0001	ETD (Electron Transfer Dissociation)	MS2	52.2574	12.152	77.5862	21629	200428_Lumos_(LC1200)_nanoFlex_Ieva_SARS_CoV2_i1_Chy_Chymo_90min_ETD_HCD_2ul.raw	F11		2.66	FALSE	0	0.1054
		TRUE	High	Sequest HT (A2)	Unambiguous	[W].NSNNLDSKVGGNY.[N]		1	1	QHD43416.1_S2_RBD	QHD43416.1_S2_RBD	1	2	0.6707	0	1	1	691.321	1381.63	1381.63	-0.12	-8e-05	ETD (Electron Transfer Dissociation)	MS2	65.5216	18.902	79.6264	22294	200428_Lumos_(LC1200)_nanoFlex_Ieva_SARS_CoV2_i1_Chy_Chymo_90min_ETD_HCD_2ul.raw	F11		2.49	FALSE	0	0.0162	3.52777e+06	79.2
		TRUE	High	Sequest HT (A2)	Unambiguous	[W].NSNNLDSKVGGNY.[N]		1	1	QHD43416.1_S2_RBD	QHD43416.1_S2_RBD	1	2	0.6698	0	1	1	691.321	1381.64	1381.63	1.03	0.00071	ETD (Electron Transfer Dissociation)	MS2	44.3522	22.611	83.2015	23448	200428_Lumos_(LC1200)_nanoFlex_Ieva_SARS_CoV2_i1_Chy_Chymo_90min_ETD_HCD_2ul.raw	F11		2.12	FALSE	0	0.02505
		TRUE	Low	Sequest HT (A16)	Ambiguous	[W].NSNNLDSKVGGNY.[N]		1	1	QHD43416.1_S2_RBD	QHD43416.1_S2_RBD	1	3	0.2722	0	1	1	461.217	1381.64	1381.63	0.89	0.00041	HCD (High Energy Collision Dissociation)	MS2	15.9363	22.778	44.9083	11651	200428_Lumos_(LC1200)_nanoFlex_Ieva_SARS_CoV2_i1_Chy_Chymo_90min_ETD_HCD_2ul.raw	F11		1.69	FALSE	0.8099	1	5113171	44.85
		TRUE	High	Sequest HT (A16)	Unambiguous	[W].NSNNLDSKVGGNY.[N]		1	1	QHD43416.1_S2_RBD	QHD43416.1_S2_RBD	1	2	0.488	0	1	1	691.321	1381.63	1381.63	0.41	0.00028	HCD (High Energy Collision Dissociation)	MS2	31.477	54	44.9452	11662	200428_Lumos_(LC1200)_nanoFlex_Ieva_SARS_CoV2_i1_Chy_Chymo_90min_ETD_HCD_2ul.raw	F11		2.91	FALSE	0	0.06743	3.70318e+06	44.86
		TRUE	High	Sequest HT (A16)	Unambiguous	[W].NSNNLDSKVGGNY.[N]		1	1	QHD43416.1_S2_RBD	QHD43416.1_S2_RBD	1	2	0.6395	0	1	1	691.321	1381.63	1381.63	0.14	0.0001	HCD (High Energy Collision Dissociation)	MS2	7.04865	4.374	51.7365	13645	200428_Lumos_(LC1200)_nanoFlex_Ieva_SARS_CoV2_i1_Chy_Chymo_90min_ETD_HCD_2ul.raw	F11		4.05	FALSE	0	0.001449	378244992	51.85
		TRUE	High	Sequest HT (A16)	Unambiguous	[W].NSNNLDSKVGGNY.[N]		1	1	QHD43416.1_S2_RBD	QHD43416.1_S2_RBD	1	2	0.6501	0	1	1	691.321	1381.63	1381.63	0.14	0.0001	HCD (High Energy Collision Dissociation)	MS2	16.4947	7.845	52.1212	13754	200428_Lumos_(LC1200)_nanoFlex_Ieva_SARS_CoV2_i1_Chy_Chymo_90min_ETD_HCD_2ul.raw	F11		3.83	FALSE	0	0.003326	378244992	51.85
		TRUE	High	Sequest HT (A16)	Unambiguous	[W].NSNNLDSKVGGNY.[N]		1	1	QHD43416.1_S2_RBD	QHD43416.1_S2_RBD	1	2	0.6398	0	1	1	691.321	1381.63	1381.63	0.06	4e-05	HCD (High Energy Collision Dissociation)	MS2	3.02963	3.45	52.4991	13864	200428_Lumos_(LC1200)_nanoFlex_Ieva_SARS_CoV2_i1_Chy_Chymo_90min_ETD_HCD_2ul.raw	F11		4.22	FALSE	0	0.003583	49607416	52.51
		TRUE	High	Sequest HT (A16)	Unambiguous	[W].NSNNLDSKVGGNY.[N]		1	1	QHD43416.1_S2_RBD	QHD43416.1_S2_RBD	1	2	0.6704	0	1	1	691.321	1381.63	1381.63	0.5	0.00034	HCD (High Energy Collision Dissociation)	MS2	0	0.423	53.4189	14127	200428_Lumos_(LC1200)_nanoFlex_Ieva_SARS_CoV2_i1_Chy_Chymo_90min_ETD_HCD_2ul.raw	F11		3.55	FALSE	0	0.001666	10996945920	54.08
		TRUE	High	Sequest HT (A16)	Unambiguous	[W].NSNNLDSKVGGNY.[N]		1	1	QHD43416.1_S2_RBD	QHD43416.1_S2_RBD	1	2	0.5874	0	1	1	691.321	1381.64	1381.63	0.94	0.00065	HCD (High Energy Collision Dissociation)	MS2	0.154719	0.067	53.7533	14234	200428_Lumos_(LC1200)_nanoFlex_Ieva_SARS_CoV2_i1_Chy_Chymo_90min_ETD_HCD_2ul.raw	F11		3.49	FALSE	0	0.01174	10996945920	54.08
		TRUE	High	Sequest HT (A16)	Unambiguous	[W].NSNNLDSKVGGNY.[N]		1	1	QHD43416.1_S2_RBD	QHD43416.1_S2_RBD	1	2	0.6818	0	1	1	691.321	1381.64	1381.63	0.67	0.00047	HCD (High Energy Collision Dissociation)	MS2	0	0.042	54.0978	14323	200428_Lumos_(LC1200)_nanoFlex_Ieva_SARS_CoV2_i1_Chy_Chymo_90min_ETD_HCD_2ul.raw	F11		3.96	FALSE	0	0.002623	10996945920	54.08
		TRUE	High	Sequest HT (A16)	Unambiguous	[W].NSNNLDSKVGGNY.[N]		1	1	QHD43416.1_S2_RBD	QHD43416.1_S2_RBD	1	2	0.6545	0	1	1	691.321	1381.64	1381.63	0.76	0.00053	HCD (High Energy Collision Dissociation)	MS2	0	0.064	54.4357	14418	200428_Lumos_(LC1200)_nanoFlex_Ieva_SARS_CoV2_i1_Chy_Chymo_90min_ETD_HCD_2ul.raw	F11		3.85	FALSE	0	0.0008636	10996945920	54.08
		TRUE	High	Sequest HT (A16)	Unambiguous	[W].NSNNLDSKVGGNY.[N]		1	1	QHD43416.1_S2_RBD	QHD43416.1_S2_RBD	1	2	0.6515	0	1	1	691.322	1381.64	1381.63	1.2	0.00083	HCD (High Energy Collision Dissociation)	MS2	0	0.085	54.7861	14517	200428_Lumos_(LC1200)_nanoFlex_Ieva_SARS_CoV2_i1_Chy_Chymo_90min_ETD_HCD_2ul.raw	F11		3.73	FALSE	0	0.009203	10996945920	54.08
		TRUE	High	Sequest HT (A16)	Unambiguous	[W].NSNNLDSKVGGNY.[N]		1	1	QHD43416.1_S2_RBD	QHD43416.1_S2_RBD	1	2	0.6408	0	1	1	691.321	1381.64	1381.63	0.94	0.00065	HCD (High Energy Collision Dissociation)	MS2	0.0764142	0.086	55.1321	14614	200428_Lumos_(LC1200)_nanoFlex_Ieva_SARS_CoV2_i1_Chy_Chymo_90min_ETD_HCD_2ul.raw	F11		4.12	FALSE	0	9.746e-05	10996945920	54.08
		TRUE	High	Sequest HT (A16)	Unambiguous	[W].NSNNLDSKVGGNY.[N]		1	1	QHD43416.1_S2_RBD	QHD43416.1_S2_RBD	1	2	0.6643	0	1	1	691.322	1381.64	1381.63	1.74	0.0012	HCD (High Energy Collision Dissociation)	MS2	0.330596	0.19	55.5076	14722	200428_Lumos_(LC1200)_nanoFlex_Ieva_SARS_CoV2_i1_Chy_Chymo_90min_ETD_HCD_2ul.raw	F11		4.14	FALSE	0	0.001364	10996945920	54.08
		TRUE	High	Sequest HT (A16)	Unambiguous	[W].NSNNLDSKVGGNY.[N]		1	1	QHD43416.1_S2_RBD	QHD43416.1_S2_RBD	1	2	0.6559	0	1	1	691.322	1381.64	1381.63	1.29	0.00089	HCD (High Energy Collision Dissociation)	MS2	0.944714	0.798	55.8957	14844	200428_Lumos_(LC1200)_nanoFlex_Ieva_SARS_CoV2_i1_Chy_Chymo_90min_ETD_HCD_2ul.raw	F11		4.01	FALSE	0	0.007329	10996945920	54.08
		TRUE	High	Sequest HT (A16)	Unambiguous	[W].NSNNLDSKVGGNY.[N]		1	1	QHD43416.1_S2_RBD	QHD43416.1_S2_RBD	1	2	0.6974	0	1	1	691.321	1381.64	1381.63	0.59	0.00041	HCD (High Energy Collision Dissociation)	MS2	2.9171	1.699	56.2589	14954	200428_Lumos_(LC1200)_nanoFlex_Ieva_SARS_CoV2_i1_Chy_Chymo_90min_ETD_HCD_2ul.raw	F11		3.8	FALSE	0	0.004011	10996945920	54.08
		TRUE	High	Sequest HT (A16)	Unambiguous	[W].NSNNLDSKVGGNY.[N]		1	1	QHD43416.1_S2_RBD	QHD43416.1_S2_RBD	1	2	0.6735	0	1	1	691.321	1381.63	1381.63	0.14	0.0001	HCD (High Energy Collision Dissociation)	MS2	2.74475	2.048	56.649	15075	200428_Lumos_(LC1200)_nanoFlex_Ieva_SARS_CoV2_i1_Chy_Chymo_90min_ETD_HCD_2ul.raw	F11		3.89	FALSE	0	0.005674
		TRUE	High	Sequest HT (A16)	Unambiguous	[W].NSNNLDSKVGGNY.[N]		1	1	QHD43416.1_S2_RBD	QHD43416.1_S2_RBD	1	2	0.6724	0	1	1	691.321	1381.64	1381.63	0.76	0.00053	HCD (High Energy Collision Dissociation)	MS2	5.39285	5.804	56.9945	15178	200428_Lumos_(LC1200)_nanoFlex_Ieva_SARS_CoV2_i1_Chy_Chymo_90min_ETD_HCD_2ul.raw	F11		4.09	FALSE	0	0.001631
		TRUE	High	Sequest HT (A16)	Unambiguous	[W].NSNNLDSKVGGNY.[N]		1	1	QHD43416.1_S2_RBD	QHD43416.1_S2_RBD	1	2	0.6386	0	1	1	691.321	1381.63	1381.63	0.5	0.00034	HCD (High Energy Collision Dissociation)	MS2	0	3.257	57.3495	15293	200428_Lumos_(LC1200)_nanoFlex_Ieva_SARS_CoV2_i1_Chy_Chymo_90min_ETD_HCD_2ul.raw	F11		3.68	FALSE	0	0.009118
		TRUE	High	Sequest HT (A16)	Unambiguous	[W].NSNNLDSKVGGNY.[N]		1	1	QHD43416.1_S2_RBD	QHD43416.1_S2_RBD	1	2	0.6439	0	1	1	691.321	1381.63	1381.63	0.5	0.00034	HCD (High Energy Collision Dissociation)	MS2	13.4479	6.578	57.7094	15408	200428_Lumos_(LC1200)_nanoFlex_Ieva_SARS_CoV2_i1_Chy_Chymo_90min_ETD_HCD_2ul.raw	F11		3.96	FALSE	0	0.001259
		TRUE	High	Sequest HT (A16)	Unambiguous	[W].NSNNLDSKVGGNY.[N]		1	1	QHD43416.1_S2_RBD	QHD43416.1_S2_RBD	1	2	0.692	0	1	1	691.321	1381.63	1381.63	0.5	0.00034	HCD (High Energy Collision Dissociation)	MS2	80.1248	2.62	58.948	15787	200428_Lumos_(LC1200)_nanoFlex_Ieva_SARS_CoV2_i1_Chy_Chymo_90min_ETD_HCD_2ul.raw	F11		2.89	FALSE	0	0.03665
		TRUE	High	Sequest HT (A16)	Unambiguous	[W].NSNNLDSKVGGNY.[N]		1	1	QHD43416.1_S2_RBD	QHD43416.1_S2_RBD	1	2	0.626	0	1	1	691.321	1381.64	1381.63	1.03	0.00071	HCD (High Energy Collision Dissociation)	MS2	26.8223	9.213	59.7912	16049	200428_Lumos_(LC1200)_nanoFlex_Ieva_SARS_CoV2_i1_Chy_Chymo_90min_ETD_HCD_2ul.raw	F11		3.77	FALSE	0	0.00498
		TRUE	High	Sequest HT (A16)	Unambiguous	[W].NSNNLDSKVGGNY.[N]		1	1	QHD43416.1_S2_RBD	QHD43416.1_S2_RBD	1	2	0.663	0	1	1	691.322	1381.64	1381.63	1.12	0.00077	HCD (High Energy Collision Dissociation)	MS2	19.2841	5.643	60.166	16159	200428_Lumos_(LC1200)_nanoFlex_Ieva_SARS_CoV2_i1_Chy_Chymo_90min_ETD_HCD_2ul.raw	F11		3.62	FALSE	0	0.008864
		TRUE	High	Sequest HT (A16)	Unambiguous	[W].NSNNLDSKVGGNY.[N]		1	1	QHD43416.1_S2_RBD	QHD43416.1_S2_RBD	1	2	0.6779	0	1	1	691.321	1381.64	1381.63	0.67	0.00047	HCD (High Energy Collision Dissociation)	MS2	3.90708	5.033	60.5495	16280	200428_Lumos_(LC1200)_nanoFlex_Ieva_SARS_CoV2_i1_Chy_Chymo_90min_ETD_HCD_2ul.raw	F11		3.85	FALSE	0	0.001582
		TRUE	High	Sequest HT (A16)	Unambiguous	[W].NSNNLDSKVGGNY.[N]		1	1	QHD43416.1_S2_RBD	QHD43416.1_S2_RBD	1	2	0.5958	0	1	1	691.321	1381.64	1381.63	0.67	0.00047	HCD (High Energy Collision Dissociation)	MS2	18.7522	6.2	60.9248	16390	200428_Lumos_(LC1200)_nanoFlex_Ieva_SARS_CoV2_i1_Chy_Chymo_90min_ETD_HCD_2ul.raw	F11		3.81	FALSE	0	0.004032
		TRUE	High	Sequest HT (A16)	Unambiguous	[W].NSNNLDSKVGGNY.[N]		1	1	QHD43416.1_S2_RBD	QHD43416.1_S2_RBD	1	2	0.6625	0	1	1	691.321	1381.63	1381.63	0.41	0.00028	HCD (High Energy Collision Dissociation)	MS2	10.4867	5.169	61.4208	16537	200428_Lumos_(LC1200)_nanoFlex_Ieva_SARS_CoV2_i1_Chy_Chymo_90min_ETD_HCD_2ul.raw	F11		3.23	FALSE	0	0.01653
		TRUE	High	Sequest HT (A16)	Unambiguous	[W].NSNNLDSKVGGNY.[N]		1	1	QHD43416.1_S2_RBD	QHD43416.1_S2_RBD	1	2	0.645	0	1	1	691.321	1381.63	1381.63	0.06	4e-05	HCD (High Energy Collision Dissociation)	MS2	45.39	9.582	61.8279	16666	200428_Lumos_(LC1200)_nanoFlex_Ieva_SARS_CoV2_i1_Chy_Chymo_90min_ETD_HCD_2ul.raw	F11		4	FALSE	0	0.00248
		TRUE	High	Sequest HT (A16)	Unambiguous	[W].NSNNLDSKVGGNY.[N]		1	1	QHD43416.1_S2_RBD	QHD43416.1_S2_RBD	1	2	0.6817	0	1	1	691.321	1381.63	1381.63	-0.21	-0.00014	HCD (High Energy Collision Dissociation)	MS2	25.9169	6.63	62.801	16962	200428_Lumos_(LC1200)_nanoFlex_Ieva_SARS_CoV2_i1_Chy_Chymo_90min_ETD_HCD_2ul.raw	F11		3.77	FALSE	0	0.001223	19556176	63.24
		TRUE	High	Sequest HT (A16)	Unambiguous	[W].NSNNLDSKVGGNY.[N]		1	1	QHD43416.1_S2_RBD	QHD43416.1_S2_RBD	1	2	0.6599	0	1	1	691.322	1381.64	1381.63	1.2	0.00083	HCD (High Energy Collision Dissociation)	MS2	68.0055	7.759	63.1834	17083	200428_Lumos_(LC1200)_nanoFlex_Ieva_SARS_CoV2_i1_Chy_Chymo_90min_ETD_HCD_2ul.raw	F11		3.44	FALSE	0	0.02853	19556176	63.24
		TRUE	High	Sequest HT (A16)	Unambiguous	[W].NSNNLDSKVGGNY.[N]		1	1	QHD43416.1_S2_RBD	QHD43416.1_S2_RBD	1	2	0.5992	0	1	1	691.321	1381.63	1381.63	0.5	0.00034	HCD (High Energy Collision Dissociation)	MS2	45.9782	10.37	63.694	17239	200428_Lumos_(LC1200)_nanoFlex_Ieva_SARS_CoV2_i1_Chy_Chymo_90min_ETD_HCD_2ul.raw	F11		2.52	FALSE	0.0009362	0.1484	19556176	63.24
		TRUE	High	Sequest HT (A16)	Unambiguous	[W].NSNNLDSKVGGNY.[N]		1	1	QHD43416.1_S2_RBD	QHD43416.1_S2_RBD	1	2	0.6436	0	1	1	691.321	1381.63	1381.63	-0.03	-2e-05	HCD (High Energy Collision Dissociation)	MS2	58.7982	9.486	64.0729	17359	200428_Lumos_(LC1200)_nanoFlex_Ieva_SARS_CoV2_i1_Chy_Chymo_90min_ETD_HCD_2ul.raw	F11		3.76	FALSE	0	0.008364	19556176	63.24
		TRUE	High	Sequest HT (A16)	Unambiguous	[W].NSNNLDSKVGGNY.[N]		1	1	QHD43416.1_S2_RBD	QHD43416.1_S2_RBD	1	2	0.6465	0	1	1	691.321	1381.63	1381.63	-0.03	-2e-05	HCD (High Energy Collision Dissociation)	MS2	17.8302	7.455	64.4353	17477	200428_Lumos_(LC1200)_nanoFlex_Ieva_SARS_CoV2_i1_Chy_Chymo_90min_ETD_HCD_2ul.raw	F11		2.97	FALSE	0	0.01356	19556176	63.24
		TRUE	High	Sequest HT (A16)	Unambiguous	[W].NSNNLDSKVGGNY.[N]		1	1	QHD43416.1_S2_RBD	QHD43416.1_S2_RBD	1	2	0.6503	0	1	1	691.321	1381.63	1381.63	0.14	0.0001	HCD (High Energy Collision Dissociation)	MS2	45.6287	6.389	65.4163	17779	200428_Lumos_(LC1200)_nanoFlex_Ieva_SARS_CoV2_i1_Chy_Chymo_90min_ETD_HCD_2ul.raw	F11		3.66	FALSE	0	0.0005211	14968111	65.05
		TRUE	High	Sequest HT (A16)	Unambiguous	[W].NSNNLDSKVGGNY.[N]		1	1	QHD43416.1_S2_RBD	QHD43416.1_S2_RBD	1	2	0.6258	0	1	1	691.321	1381.63	1381.63	0.14	0.0001	HCD (High Energy Collision Dissociation)	MS2	32.7314	5.118	65.8115	17904	200428_Lumos_(LC1200)_nanoFlex_Ieva_SARS_CoV2_i1_Chy_Chymo_90min_ETD_HCD_2ul.raw	F11		3.26	FALSE	0	0.007289	14968111	65.05
		TRUE	High	Sequest HT (A16)	Unambiguous	[W].NSNNLDSKVGGNY.[N]		1	1	QHD43416.1_S2_RBD	QHD43416.1_S2_RBD	1	2	0.5636	0	1	1	691.321	1381.63	1381.63	-0.21	-0.00014	HCD (High Energy Collision Dissociation)	MS2	13.2287	8.304	66.3089	18065	200428_Lumos_(LC1200)_nanoFlex_Ieva_SARS_CoV2_i1_Chy_Chymo_90min_ETD_HCD_2ul.raw	F11		2.75	FALSE	0	0.02106
		TRUE	High	Sequest HT (A16)	Unambiguous	[W].NSNNLDSKVGGNY.[N]		1	1	QHD43416.1_S2_RBD	QHD43416.1_S2_RBD	1	2	0.6215	0	1	1	691.321	1381.63	1381.63	-0.21	-0.00014	HCD (High Energy Collision Dissociation)	MS2	0	15.261	66.6634	18181	200428_Lumos_(LC1200)_nanoFlex_Ieva_SARS_CoV2_i1_Chy_Chymo_90min_ETD_HCD_2ul.raw	F11		2.88	FALSE	0	0.05453
[truncated: 897 more rows]

## Sheet: PeptideGroups i1 GluTry
Checked	Confidence	Annotated Sequence	Modifications	Modifications in Proteins	Contaminant	Qvality PEP	Qvality q-value	# Protein Groups	# Proteins	# PSMs	Master Protein Accessions	Positions in Master Proteins	# Missed Cleavages	Theo. MH+ [Da]	# Razor Quan Results	Abundance: F12: Sample	Quan Info	Found in Sample: [S12] F12: Sample	Confidence (by Search Engine): Sequest HT	Percolator q-Value (by Search Engine): Sequest HT	Percolator PEP (by Search Engine): Sequest HT	XCorr (by Search Engine): Sequest HT	Top Apex RT [min]	Manual validation of PTM assignment	Position(s) in SARS-CoV2 spike
[truncated: 107 more rows]

[truncated: 9 more sheets: PSMs i1 GluTry, PeptideGroups i3 Chy, PSMs i3 Chy, PeptideGroups i3 GluTry, PSMs i3 GluTry, PeptideGroups h3m Chy, PSMs h3m Chy, PeptideGroups h3m GluTry, PSMs h3m GluTry]
